# Supplementary material for: Critical scales to explain urban hydrological response: an application in Cranbrook, London
Source: Copernicus journal article supplement (doi:10.5194/hess-22-2425-2018), 2018-04-23
Supplement: Supplementary file 1 [file hess-22-2425-2018-supplement.zip]

Archive with 205 entries (200 files):
- Frame/
- Frame/frame tex test/
- Frame/frame tex test/d-paper-frame-test.tex
- Frame/frame tex test/d-paper-frame-test.aux
- Frame/frame tex test/sub_bgdiscuss_05062017_last.pdf
- Frame/frame tex test/acp-2017-561-manuscript-version3new.pdf
- Frame/frame tex test/d-paper-frame-test.log
- Frame/frame tex test/d-paper-frame-test.tex~
- Order/
- Order/RE_S7_loc9.png
- Order/RE_SVI_loc2.png
- Order/RE_S7_loc1.png
- Order/R2_OchoaT_loc9.png
- Order/RE_SVI_loc1.png
- Order/R2_SVI_loc5.png
- Order/R2_SVI_loc8.png
- Order/RE_OchoaS_loc8.png
- Order/RE_T7plus_loc12.png
- Order/R2_SVI_loc1.png
- Order/R2_OchoaT_loc3.png
- Order/R2_OchoaS_loc3.png
- Order/RE_OchoaS_loc10.png
- Order/R2_OchoaT_loc8.png
- Order/R2_OchoaT_loc4.png
- Order/R2_OchoaS_loc5.png
- Order/R2_OchoaS_loc13.png
- Order/R2_SVI_loc12.png
- Order/RE_OchoaT_loc12.png
- Order/RE_OchoaT_loc9.png
- Order/RE_SVI_loc4.png
- Order/R2_SVI_loc10.png
- Order/RE_SVI_loc11.png
- Order/RE_S7_loc10.png
- Order/RE_OchoaS_loc2.png
- Order/RE_OchoaT_loc3.png
- Order/RE_S7_loc12.png
- Order/RE_OchoaS_loc6.png
- Order/RE_OchoaT_loc10.png
- Order/R2_SVI_loc2.png
- Order/RE_T7plus_loc13.png
- Order/RE_SVI_loc6.png
- Order/RE_OchoaT_loc6.png
- Order/R2_OchoaS_loc7.png
- Order/R2_S7_loc5.png
- Order/R2_S22_loc5.png
- Order/RE_T7plus_loc6.png
- Order/RE_T7plus_loc1.png
- Order/RE_S22_loc2.png
- Order/RE_S22_loc8.png
- Order/RE_OchoaT_loc5.png
- Order/R2_S22_loc10.png
- Order/R2_S22_loc8.png
- Order/RE_SVI_loc12.png
- Order/R2_T7plus_loc8.png
- Order/R2_SVI_loc6.png
- Order/R2_SVI_loc7.png
- Order/R2_SVI_loc13.png
- Order/RE_T7plus_loc2.png
- Order/R2_T7plus_loc13.png
- Order/RE_S7_loc7.png
- Order/RE_SVI_loc8.png
- Order/RE_S7_loc13.png
- Order/RE_OchoaT_loc4.png
- Order/R2_S22_loc13.png
- Order/R2_OchoaT_loc5.png
- Order/RE_OchoaS_loc5.png
- Order/RE_OchoaT_loc2.png
- Order/RE_OchoaT_loc1.png
- Order/RE_S7_loc4.png
- Order/RE_S22_loc10.png
- Order/R2_OchoaT_loc2.png
- Order/RE_S22_loc4.png
- Order/R2_S7_loc6.png
- Order/R2_OchoaS_loc11.png
- Order/R2_S7_loc12.png
- Order/R2_S22_loc7.png
- Order/R2_S22_loc11.png
- Order/R2_S22_loc4.png
- Order/RE_T7plus_loc10.png
- Order/R2_OchoaS_loc12.png
- Order/R2_T7plus_loc2.png
- Order/RE_OchoaS_loc9.png
- Order/RE_OchoaS_loc13.png
- Order/R2_SVI_loc9.png
- Order/RE_OchoaS_loc11.png
- Order/RE_S22_loc9.png
- Order/R2_OchoaT_loc1.png
- Order/R2_OchoaT_loc10.png
- Order/RE_S7_loc2.png
- Order/RE_OchoaS_loc4.png
- Order/RE_S7_loc5.png
- Order/R2_S22_loc6.png
- Order/RE_S7_loc8.png
- Order/RE_OchoaT_loc11.png
- Order/R2_OchoaS_loc6.png
- Order/RE_T7plus_loc9.png
- Order/R2_OchoaS_loc1.png
- Order/R2_OchoaT_loc6.png
- Order/R2_S22_loc9.png
- Order/RE_T7plus_loc5.png
- Order/RE_SVI_loc10.png
- Order/RE_T7plus_loc8.png
- Order/R2_S7_loc11.png
- Order/RE_OchoaT_loc8.png
- Order/RE_OchoaS_loc7.png
- Order/RE_S22_loc1.png
- Order/R2_OchoaS_loc2.png
- Order/RE_OchoaS_loc12.png
- Order/RE_T7plus_loc11.png
- Order/R2_T7plus_loc9.png
- Order/RE_SVI_loc3.png
- Order/RE_OchoaS_loc3.png
- Order/R2_T7plus_loc4.png
- Order/R2_T7plus_loc3.png
- Order/R2_T7plus_loc12.png
- Order/R2_T7plus_loc11.png
- Order/R2_S7_loc9.png
- Order/RE_T7plus_loc3.png
- Order/R2_OchoaS_loc9.png
- Order/R2_S7_loc3.png
- Order/RE_SVI_loc13.png
- Order/RE_S22_loc11.png
- Order/R2_S7_loc10.png
- Order/R2_S22_loc2.png
- Order/RE_S22_loc7.png
- Order/R2_S22_loc1.png
- Order/R2_S7_loc7.png
- Order/RE_S7_loc11.png
- Order/R2_OchoaT_loc7.png
- Order/RE_SVI_loc9.png
- Order/RE_SVI_loc5.png
- Order/RE_OchoaT_loc13.png
- Order/R2_OchoaS_loc10.png
- Order/R2_S7_loc4.png
- Order/R2_T7plus_loc5.png
- Order/R2_OchoaT_loc12.png
- Order/R2_T7plus_loc10.png
- Order/R2_T7plus_loc1.png
- Order/R2_T7plus_loc7.png
- Order/RE_S22_loc6.png
- Order/R2_SVI_loc4.png
- Order/RE_S7_loc3.png
- Order/RE_T7plus_loc7.png
- Order/R2_S22_loc3.png
- Order/RE_S22_loc12.png
- Order/R2_S7_loc8.png
- Order/RE_S22_loc5.png
- Order/R2_OchoaT_loc13.png
- Order/R2_OchoaS_loc8.png
- Order/R2_OchoaT_loc11.png
- Order/RE_S22_loc3.png
- Order/RE_SVI_loc7.png
- Order/RE_OchoaS_loc1.png
- Order/R2_SVI_loc11.png
- Order/RE_S22_loc13.png
- Order/RE_S7_loc6.png
- Order/R2_T7plus_loc6.png
- Order/R2_S22_loc12.png
- Order/R2_OchoaS_loc4.png
- Order/RE_OchoaT_loc7.png
- Order/R2_S7_loc2.png
- Order/R2_S7_loc1.png
- Order/RE_T7plus_loc4.png
- Order/R2_S7_loc13.png
- Order/R2_SVI_loc3.png
- Rainfall/
- Rainfall/WA2_rainfall_R2_E4.png
- Rainfall/WA2_rainfall_RE_E2.png
- Rainfall/WA2_rainfall_RE_E9.png
- Rainfall/WA2_rainfall_RE_E4.png
- Rainfall/WA2_rainfall_R2_E5.png
- Rainfall/WA2_rainfall_R2_E7.png
- Rainfall/WA2_rainfall_R2_E8.png
- Rainfall/WA2_rainfall_RE_E5.png
- Rainfall/WA2_rainfall_RE_E1.png
- Rainfall/WA2_rainfall_RE_E3.png
- Rainfall/WA2_rainfall_R2_E9.png
- Rainfall/WA2_rainfall_R2_E6.png
- Rainfall/WA2_rainfall_RE_E8.png
- Rainfall/WA2_rainfall_R2_E2.png
- Rainfall/WA2_rainfall_R2_E3.png
- Rainfall/WA2_rainfall_RE_E7.png
- Rainfall/WA2_rainfall_RE_E6.png
- Rainfall/WA2_rainfall_R2_E1.png
- hess-22-2425-2018-supplement-title-page.pdf
- Flow/
- Flow/Flow3_RE_E9.png
- Flow/Flow3_R2_E8.png
- Flow/Flow3_RE_E6.png
- Flow/Flow3_RE_E4.png
- Flow/Flow3_RE_E7.png
- Flow/Flow3_R2_E6.png
- Flow/Flow3_R2_E9.png
- Flow/Flow3_RE_E5.png
- Flow/Flow3_RE_E1.png
- Flow/Flow3_R2_E5.png
- Flow/Flow3_R2_E2.png
- Flow/Flow3_RE_E2.png
- Flow/Flow3_RE_E8.png
- Flow/Flow3_RE_E3.png
- Flow/Legg.png
- Flow/Flow3_R2_E7.png
- Flow/Flow3_R2_E3.png
- Flow/Flow3_R2_E4.png
- Flow/Flow3_R2_E1.png
