# Supplementary material for: Critical scales to explain urban hydrological response: an application in Cranbrook, London
Source: Copernicus journal article supplement (doi:10.5194/hess-22-2425-2018), 2018-04-23
Supplement: Supplementary file 1 [file hess-22-2425-2018-supplement.zip › hess-22-2425-2018-supplement-title-page.pdf]

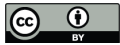

## *Supplement of*

# **Critical scales to explain urban hydrological response: an application in Cranbrook, London**

**Elena Cristiano et al.**

*Correspondence to:* Elena Cristiano (e.cristiano@tudelft.nl)

- hess-22-2425-2018-supplement-title-page.pdf
- Flow
  - Flow3\_R2\_E1.png
  - Flow3\_R2\_E2.png
  - Flow3\_R2\_E3.png
  - Flow3\_R2\_E4.png
  - Flow3\_R2\_E5.png
  - Flow3\_R2\_E6.png
  - Flow3\_R2\_E7.png
  - Flow3\_R2\_E8.png
  - Flow3\_R2\_E9.png
  - Flow3\_RE\_E1.png
  - Flow3\_RE\_E2.png
  - Flow3\_RE\_E3.png
  - Flow3\_RE\_E4.png
  - Flow3\_RE\_E5.png
  - Flow3\_RE\_E6.png
  - Flow3\_RE\_E7.png
  - Flow3\_RE\_E8.png
  - Flow3\_RE\_E9.png
  - Legg.png
- Frame
  - frame tex test
    - \* acp-2017-561-manuscript-version3new.pdf

- \* d-paper-frame-test.aux
- \* d-paper-frame-test.log
- \* d-paper-frame-test.tex
- \* d-paper-frame-test.tex
- \* sub\_bgdiscuss\_05062017\_last.pdf

- Order

- R2\_OchoaS\_loc1.png
- R2\_OchoaS\_loc10.png
- R2\_OchoaS\_loc11.png
- R2\_OchoaS\_loc12.png
- R2\_OchoaS\_loc13.png
- R2\_OchoaS\_loc2.png
- R2\_OchoaS\_loc3.png
- R2\_OchoaS\_loc4.png
- R2\_OchoaS\_loc5.png
- R2\_OchoaS\_loc6.png
- R2\_OchoaS\_loc7.png
- R2\_OchoaS\_loc8.png
- R2\_OchoaS\_loc9.png
- R2\_OchoaT\_loc1.png
- R2\_OchoaT\_loc10.png
- R2\_OchoaT\_loc11.png
- R2\_OchoaT\_loc12.png
- R2\_OchoaT\_loc13.png
- R2\_OchoaT\_loc2.png
- R2\_OchoaT\_loc3.png
- R2\_OchoaT\_loc4.png
- R2\_OchoaT\_loc5.png
- R2\_OchoaT\_loc6.png
- R2\_OchoaT\_loc7.png
- R2\_OchoaT\_loc8.png
- R2\_OchoaT\_loc9.png
- R2\_S22\_loc1.png
- R2\_S22\_loc10.png
- R2\_S22\_loc11.png
- R2\_S22\_loc12.png
- R2\_S22\_loc13.png
- R2\_S22\_loc2.png
- R2\_S22\_loc3.png
- R2\_S22\_loc4.png
- R2\_S22\_loc5.png
- R2\_S22\_loc6.png

- R2\_S22\_loc7.png
- R2\_S22\_loc8.png
- R2\_S22\_loc9.png
- R2\_S7\_loc1.png
- R2\_S7\_loc10.png
- R2\_S7\_loc11.png
- R2\_S7\_loc12.png
- R2\_S7\_loc13.png
- R2\_S7\_loc2.png
- R2\_S7\_loc3.png
- R2\_S7\_loc4.png
- R2\_S7\_loc5.png
- R2\_S7\_loc6.png
- R2\_S7\_loc7.png
- R2\_S7\_loc8.png
- R2\_S7\_loc9.png
- R2\_SVI\_loc1.png
- R2\_SVI\_loc10.png
- R2\_SVI\_loc11.png
- R2\_SVI\_loc12.png
- R2\_SVI\_loc13.png
- R2\_SVI\_loc2.png
- R2\_SVI\_loc3.png
- R2\_SVI\_loc4.png
- R2\_SVI\_loc5.png
- R2\_SVI\_loc6.png
- R2\_SVI\_loc7.png
- R2\_SVI\_loc8.png
- R2\_SVI\_loc9.png
- R2\_T7plus\_loc1.png
- R2\_T7plus\_loc10.png
- R2\_T7plus\_loc11.png
- R2\_T7plus\_loc12.png
- R2\_T7plus\_loc13.png
- R2\_T7plus\_loc2.png
- R2\_T7plus\_loc3.png
- R2\_T7plus\_loc4.png
- R2\_T7plus\_loc5.png
- R2\_T7plus\_loc6.png
- R2\_T7plus\_loc7.png
- R2\_T7plus\_loc8.png
- R2\_T7plus\_loc9.png

- RE\_OchoaS\_loc1.png
- RE\_OchoaS\_loc10.png
- RE\_OchoaS\_loc11.png
- RE\_OchoaS\_loc12.png
- RE\_OchoaS\_loc13.png
- RE\_OchoaS\_loc2.png
- RE\_OchoaS\_loc3.png
- RE\_OchoaS\_loc4.png
- RE\_OchoaS\_loc5.png
- RE\_OchoaS\_loc6.png
- RE\_OchoaS\_loc7.png
- RE\_OchoaS\_loc8.png
- RE\_OchoaS\_loc9.png
- RE\_OchoaT\_loc1.png
- RE\_OchoaT\_loc10.png
- RE\_OchoaT\_loc11.png
- RE\_OchoaT\_loc12.png
- RE\_OchoaT\_loc13.png
- RE\_OchoaT\_loc2.png
- RE\_OchoaT\_loc3.png
- RE\_OchoaT\_loc4.png
- RE\_OchoaT\_loc5.png
- RE\_OchoaT\_loc6.png
- RE\_OchoaT\_loc7.png
- RE\_OchoaT\_loc8.png
- RE\_OchoaT\_loc9.png
- RE\_S22\_loc1.png
- RE\_S22\_loc10.png
- RE\_S22\_loc11.png
- RE\_S22\_loc12.png
- RE\_S22\_loc13.png
- RE\_S22\_loc2.png
- RE\_S22\_loc3.png
- RE\_S22\_loc4.png
- RE\_S22\_loc5.png
- RE\_S22\_loc6.png
- RE\_S22\_loc7.png
- RE\_S22\_loc8.png
- RE\_S22\_loc9.png
- RE\_S7\_loc1.png
- RE\_S7\_loc10.png
- RE\_S7\_loc11.png

- RE\_S7\_loc12.png
- RE\_S7\_loc13.png
- RE\_S7\_loc2.png
- RE\_S7\_loc3.png
- RE\_S7\_loc4.png
- RE\_S7\_loc5.png
- RE\_S7\_loc6.png
- RE\_S7\_loc7.png
- RE\_S7\_loc8.png
- RE\_S7\_loc9.png
- RE\_SVI\_loc1.png
- RE\_SVI\_loc10.png
- RE\_SVI\_loc11.png
- RE\_SVI\_loc12.png
- RE\_SVI\_loc13.png
- RE\_SVI\_loc2.png
- RE\_SVI\_loc3.png
- RE\_SVI\_loc4.png
- RE\_SVI\_loc5.png
- RE\_SVI\_loc6.png
- RE\_SVI\_loc7.png
- RE\_SVI\_loc8.png
- RE\_SVI\_loc9.png
- RE\_T7plus\_loc1.png
- RE\_T7plus\_loc10.png
- RE\_T7plus\_loc11.png
- RE\_T7plus\_loc12.png
- RE\_T7plus\_loc13.png
- RE\_T7plus\_loc2.png
- RE\_T7plus\_loc3.png
- RE\_T7plus\_loc4.png
- RE\_T7plus\_loc5.png
- RE\_T7plus\_loc6.png
- RE\_T7plus\_loc7.png
- RE\_T7plus\_loc8.png
- RE\_T7plus\_loc9.png

- Rainfall

- WA2\_rainfall\_R2\_E1.png
- WA2\_rainfall\_R2\_E2.png
- WA2\_rainfall\_R2\_E3.png
- WA2\_rainfall\_R2\_E4.png

- WA2\_rainfall\_R2\_E5.png
- WA2\_rainfall\_R2\_E6.png
- WA2\_rainfall\_R2\_E7.png
- WA2\_rainfall\_R2\_E8.png
- WA2\_rainfall\_R2\_E9.png
- WA2\_rainfall\_RE\_E1.png
- WA2\_rainfall\_RE\_E2.png
- WA2\_rainfall\_RE\_E3.png
- WA2\_rainfall\_RE\_E4.png
- WA2\_rainfall\_RE\_E5.png
- WA2\_rainfall\_RE\_E6.png
- WA2\_rainfall\_RE\_E7.png
- WA2\_rainfall\_RE\_E8.png
- WA2\_rainfall\_RE\_E9.png

The copyright of individual parts of the supplement might differ from the CC BY 4.0 License.
