# Supplementary figures and images for: Critical scales to explain urban hydrological response: an application in Cranbrook, London (part 2 of 2)
Source: Copernicus journal article supplement (doi:10.5194/hess-22-2425-2018), 2018-04-23

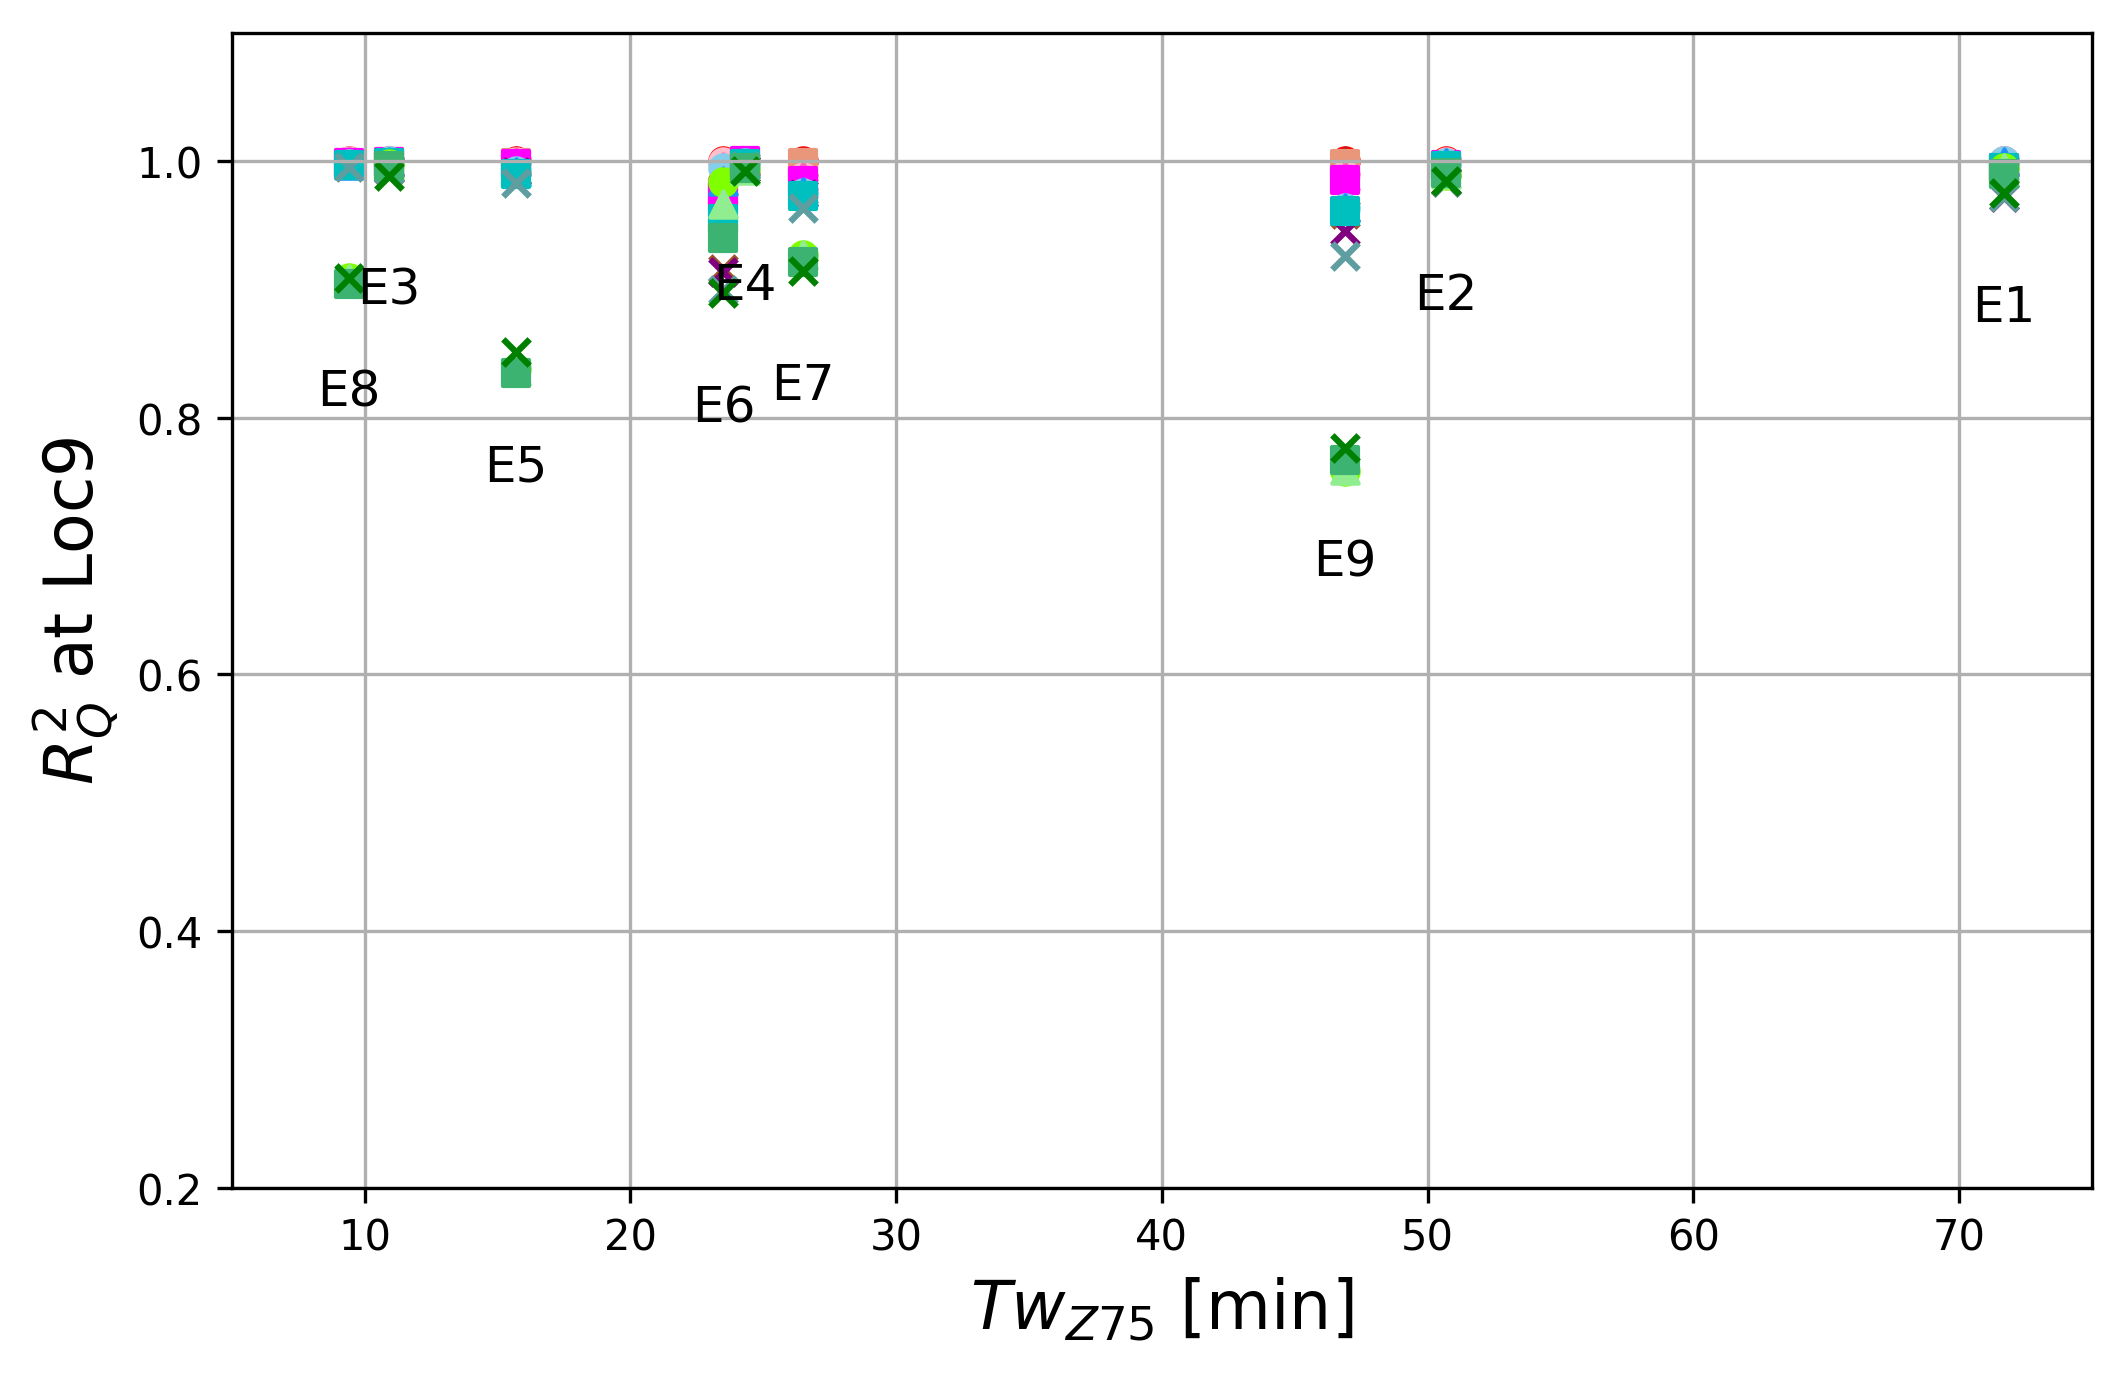

Supplement: Supplementary file 1 [file hess-22-2425-2018-supplement.zip › Order/R2_T7plus_loc9.png]

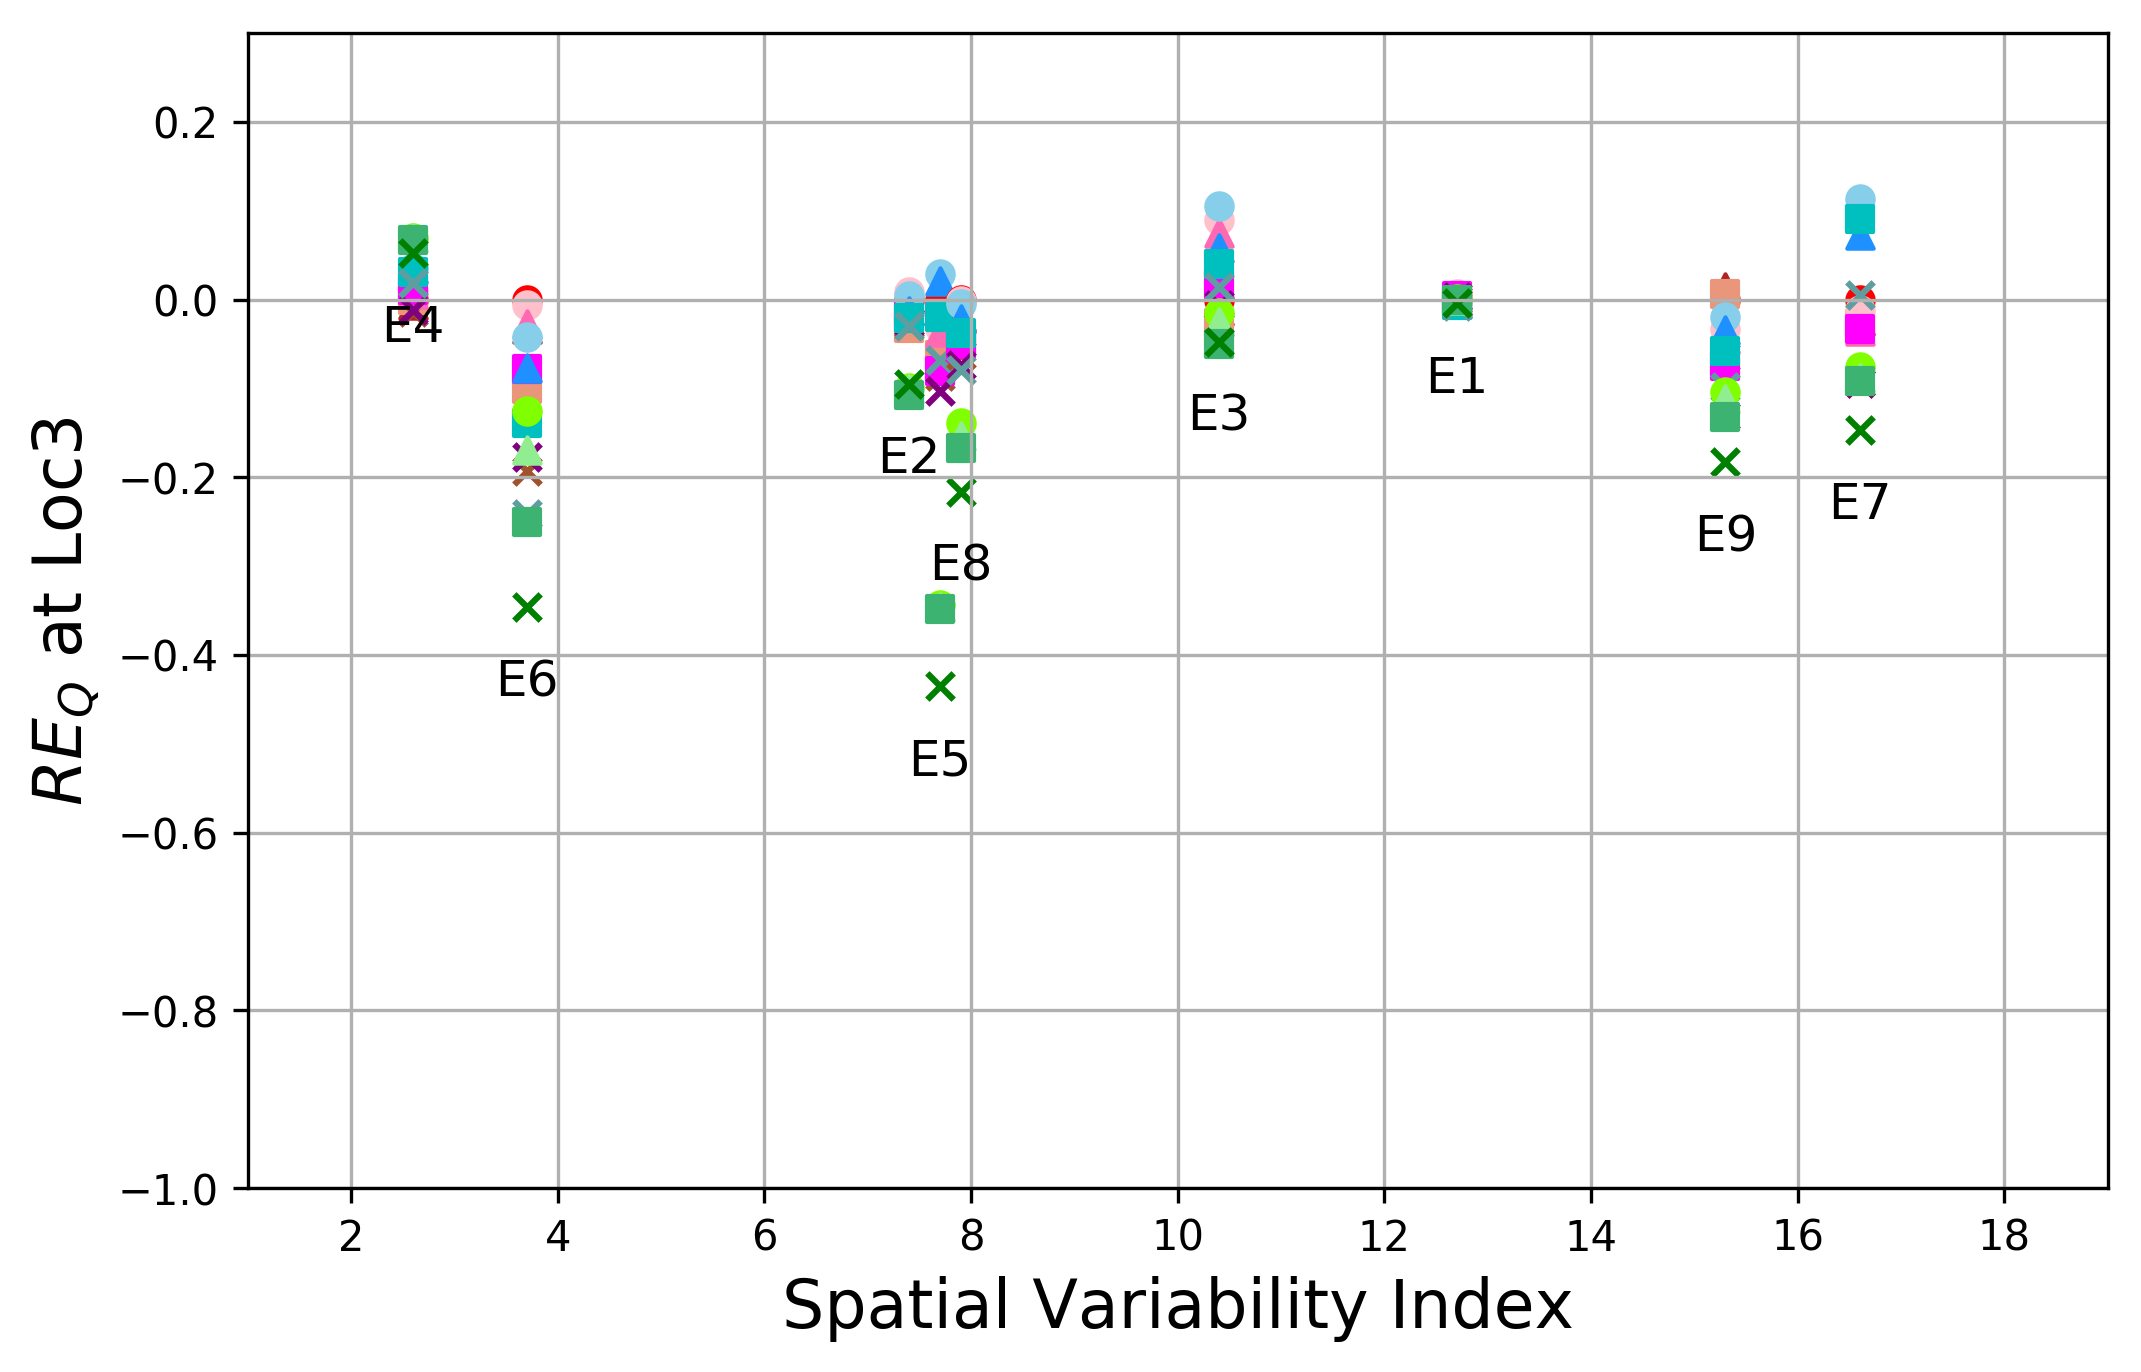

Supplement: Supplementary file 1 [file hess-22-2425-2018-supplement.zip › Order/RE_SVI_loc3.png]

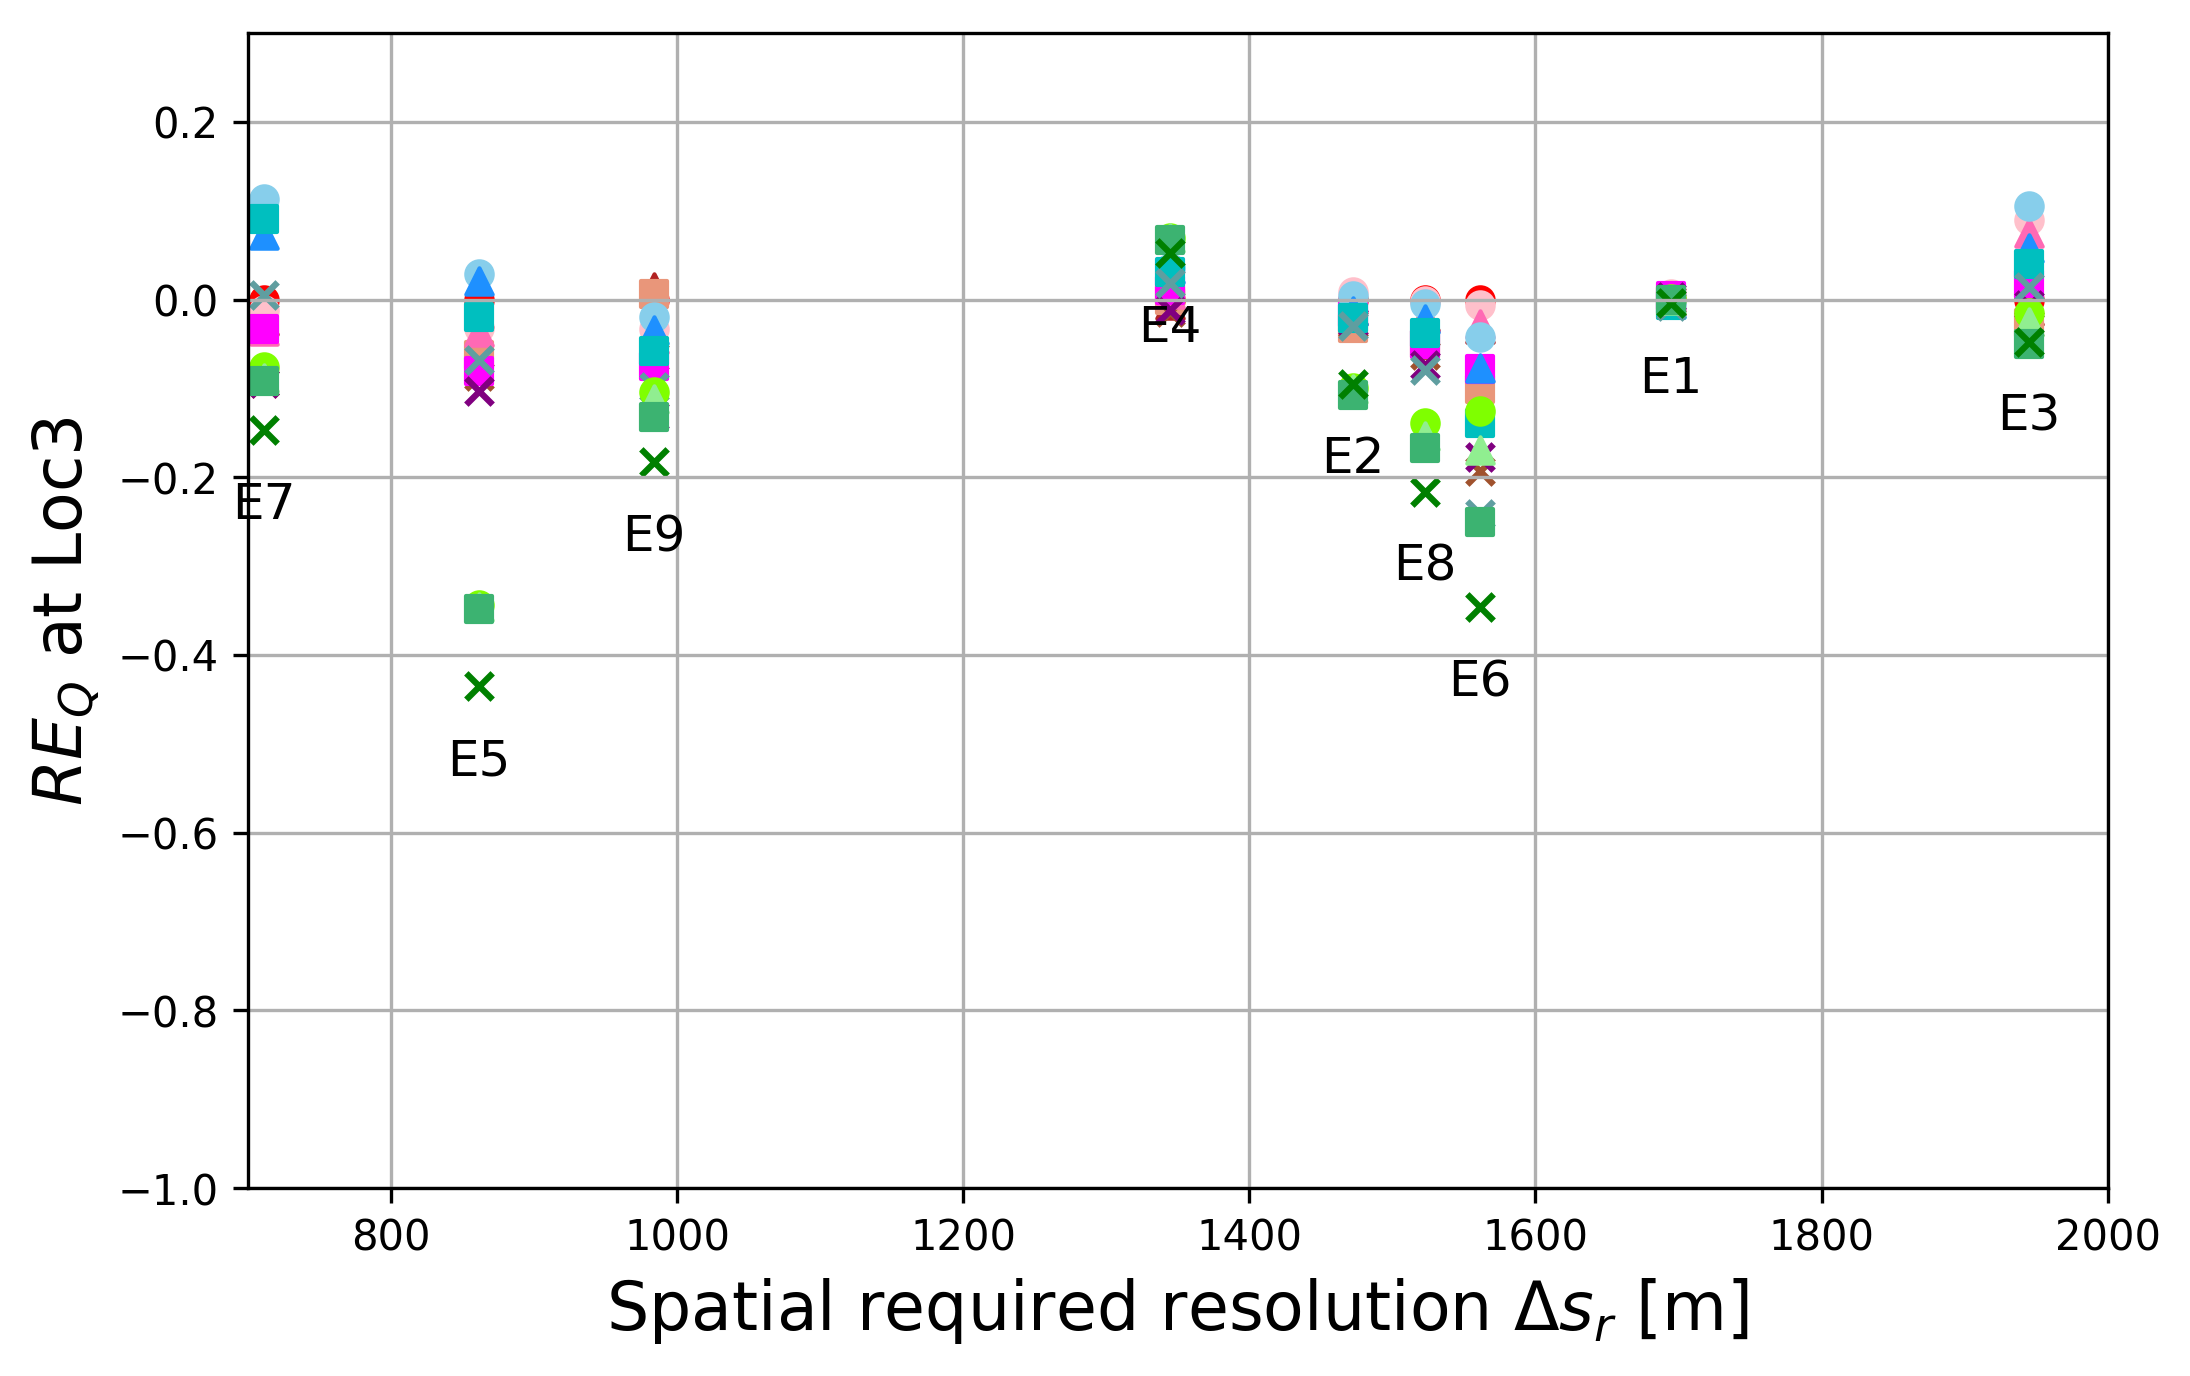

Supplement: Supplementary file 1 [file hess-22-2425-2018-supplement.zip › Order/RE_OchoaS_loc3.png]

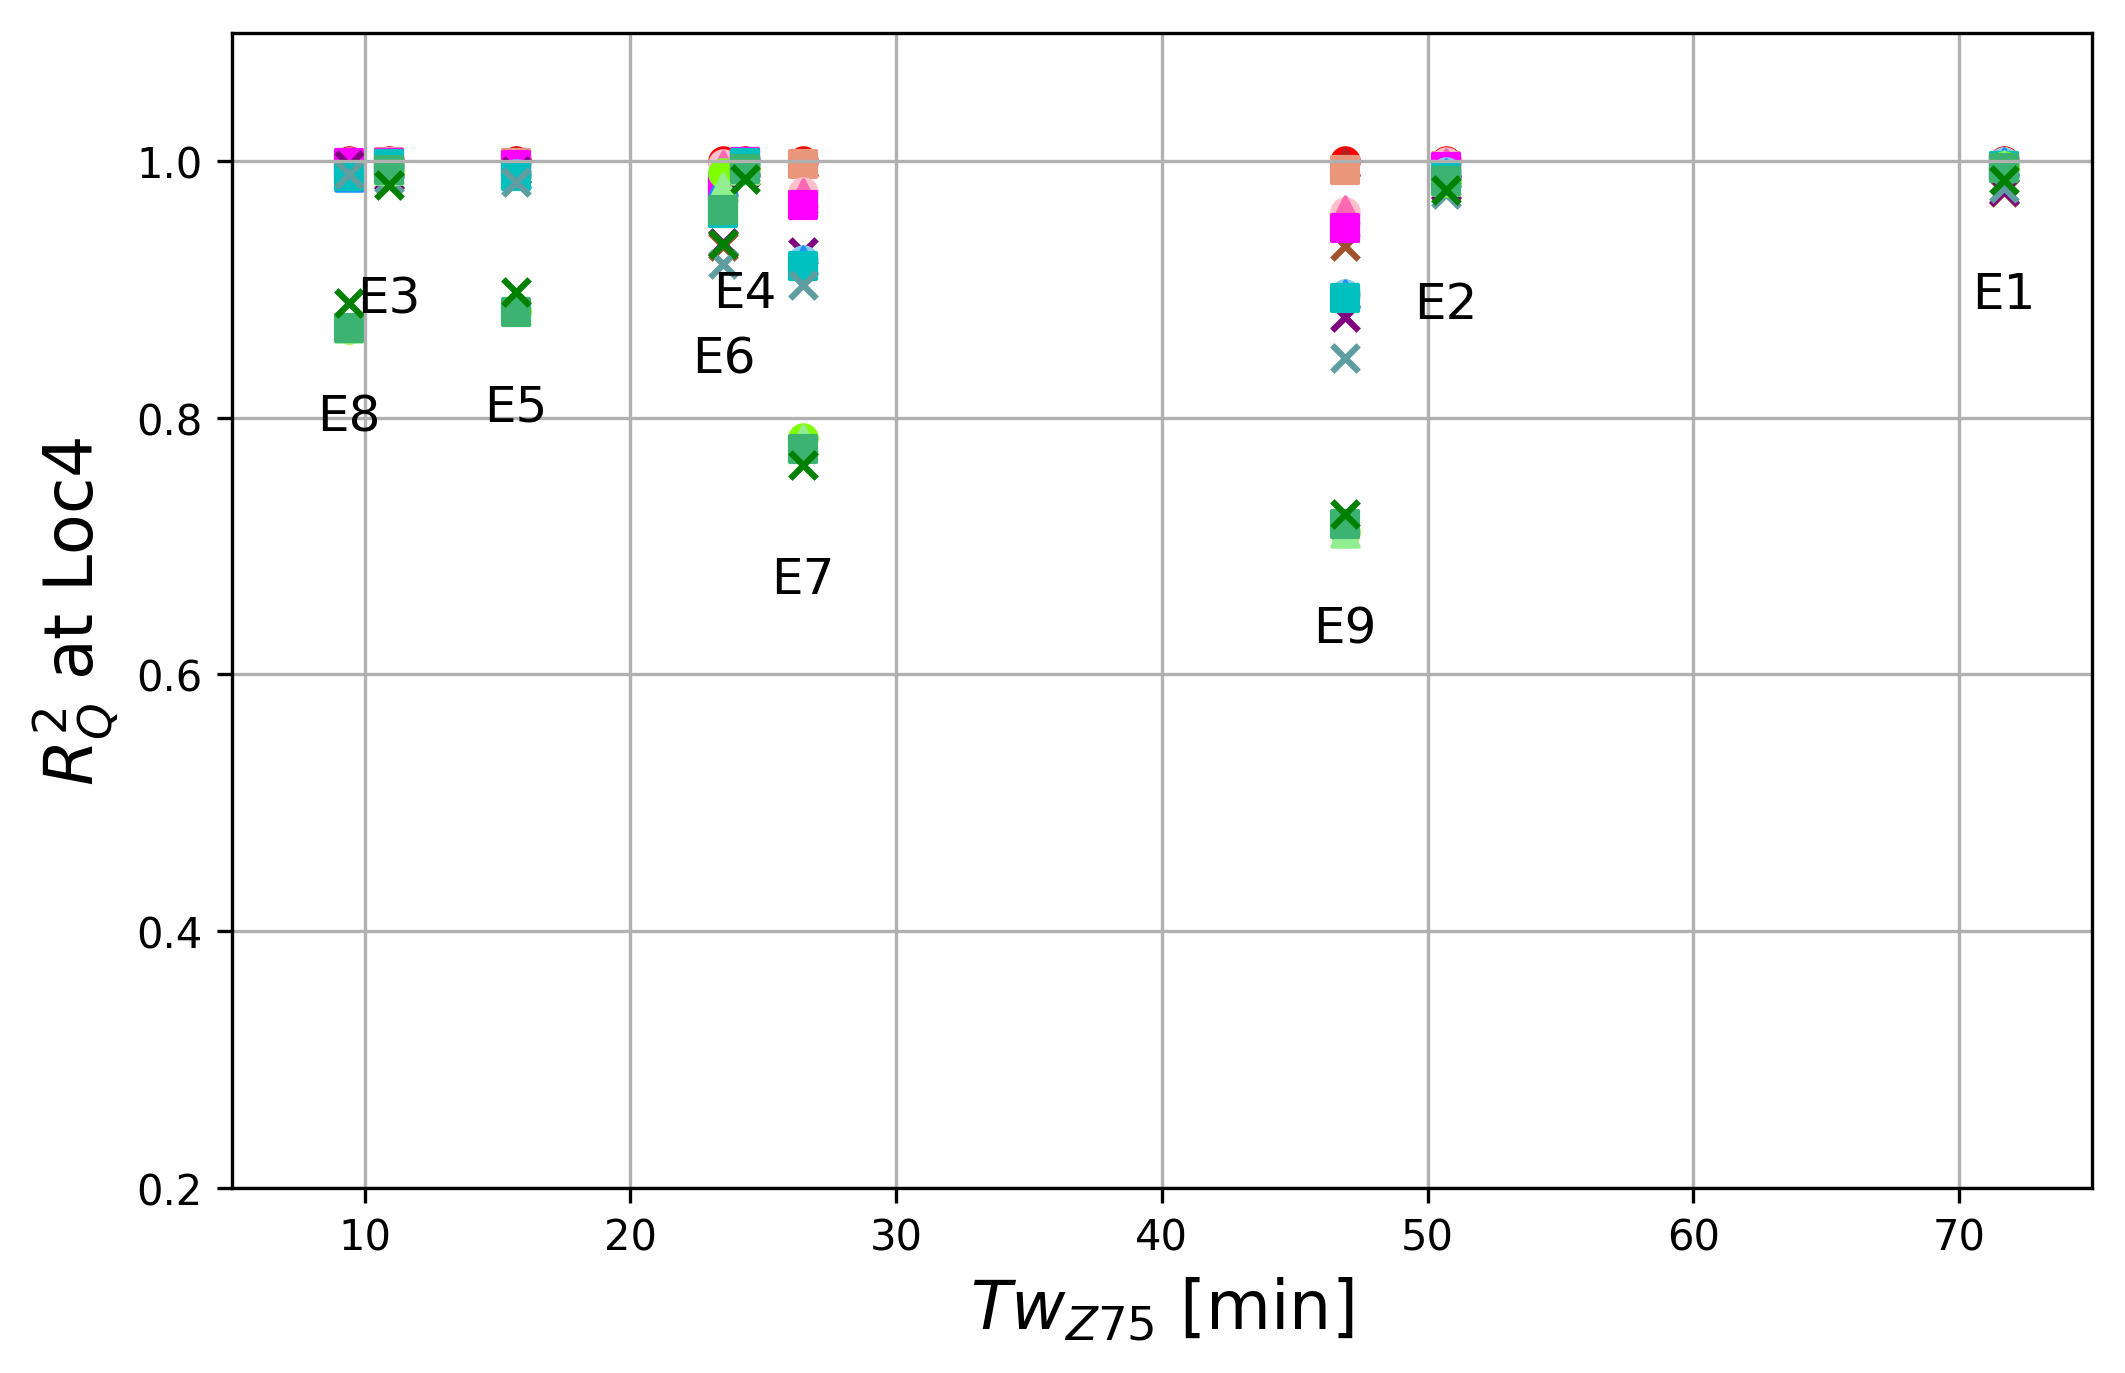

Supplement: Supplementary file 1 [file hess-22-2425-2018-supplement.zip › Order/R2_T7plus_loc4.png]

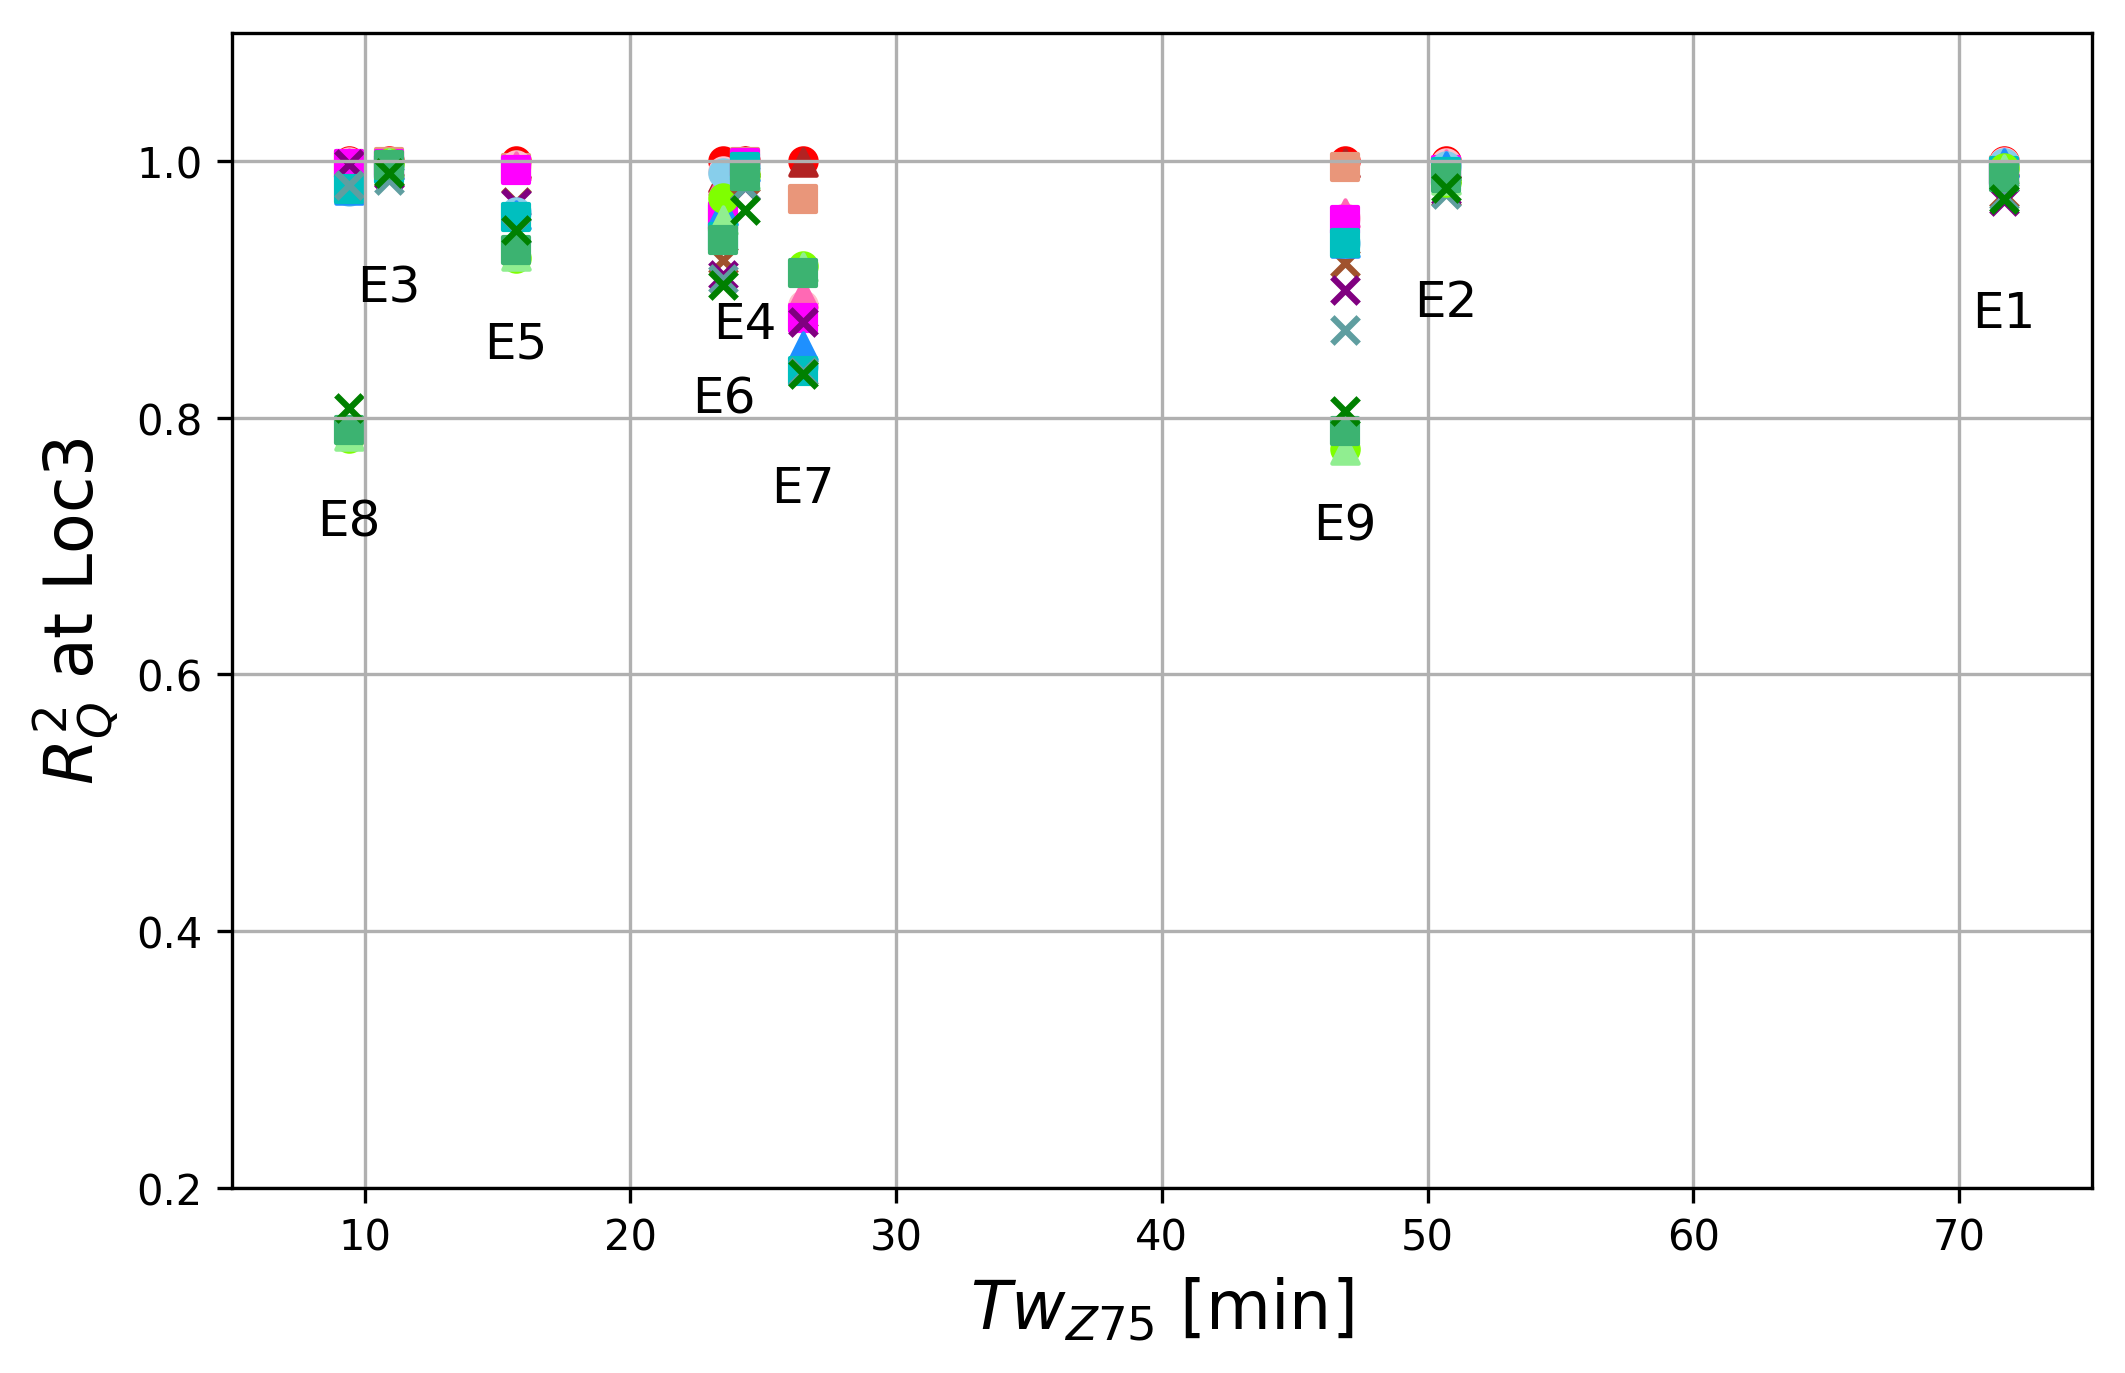

Supplement: Supplementary file 1 [file hess-22-2425-2018-supplement.zip › Order/R2_T7plus_loc3.png]

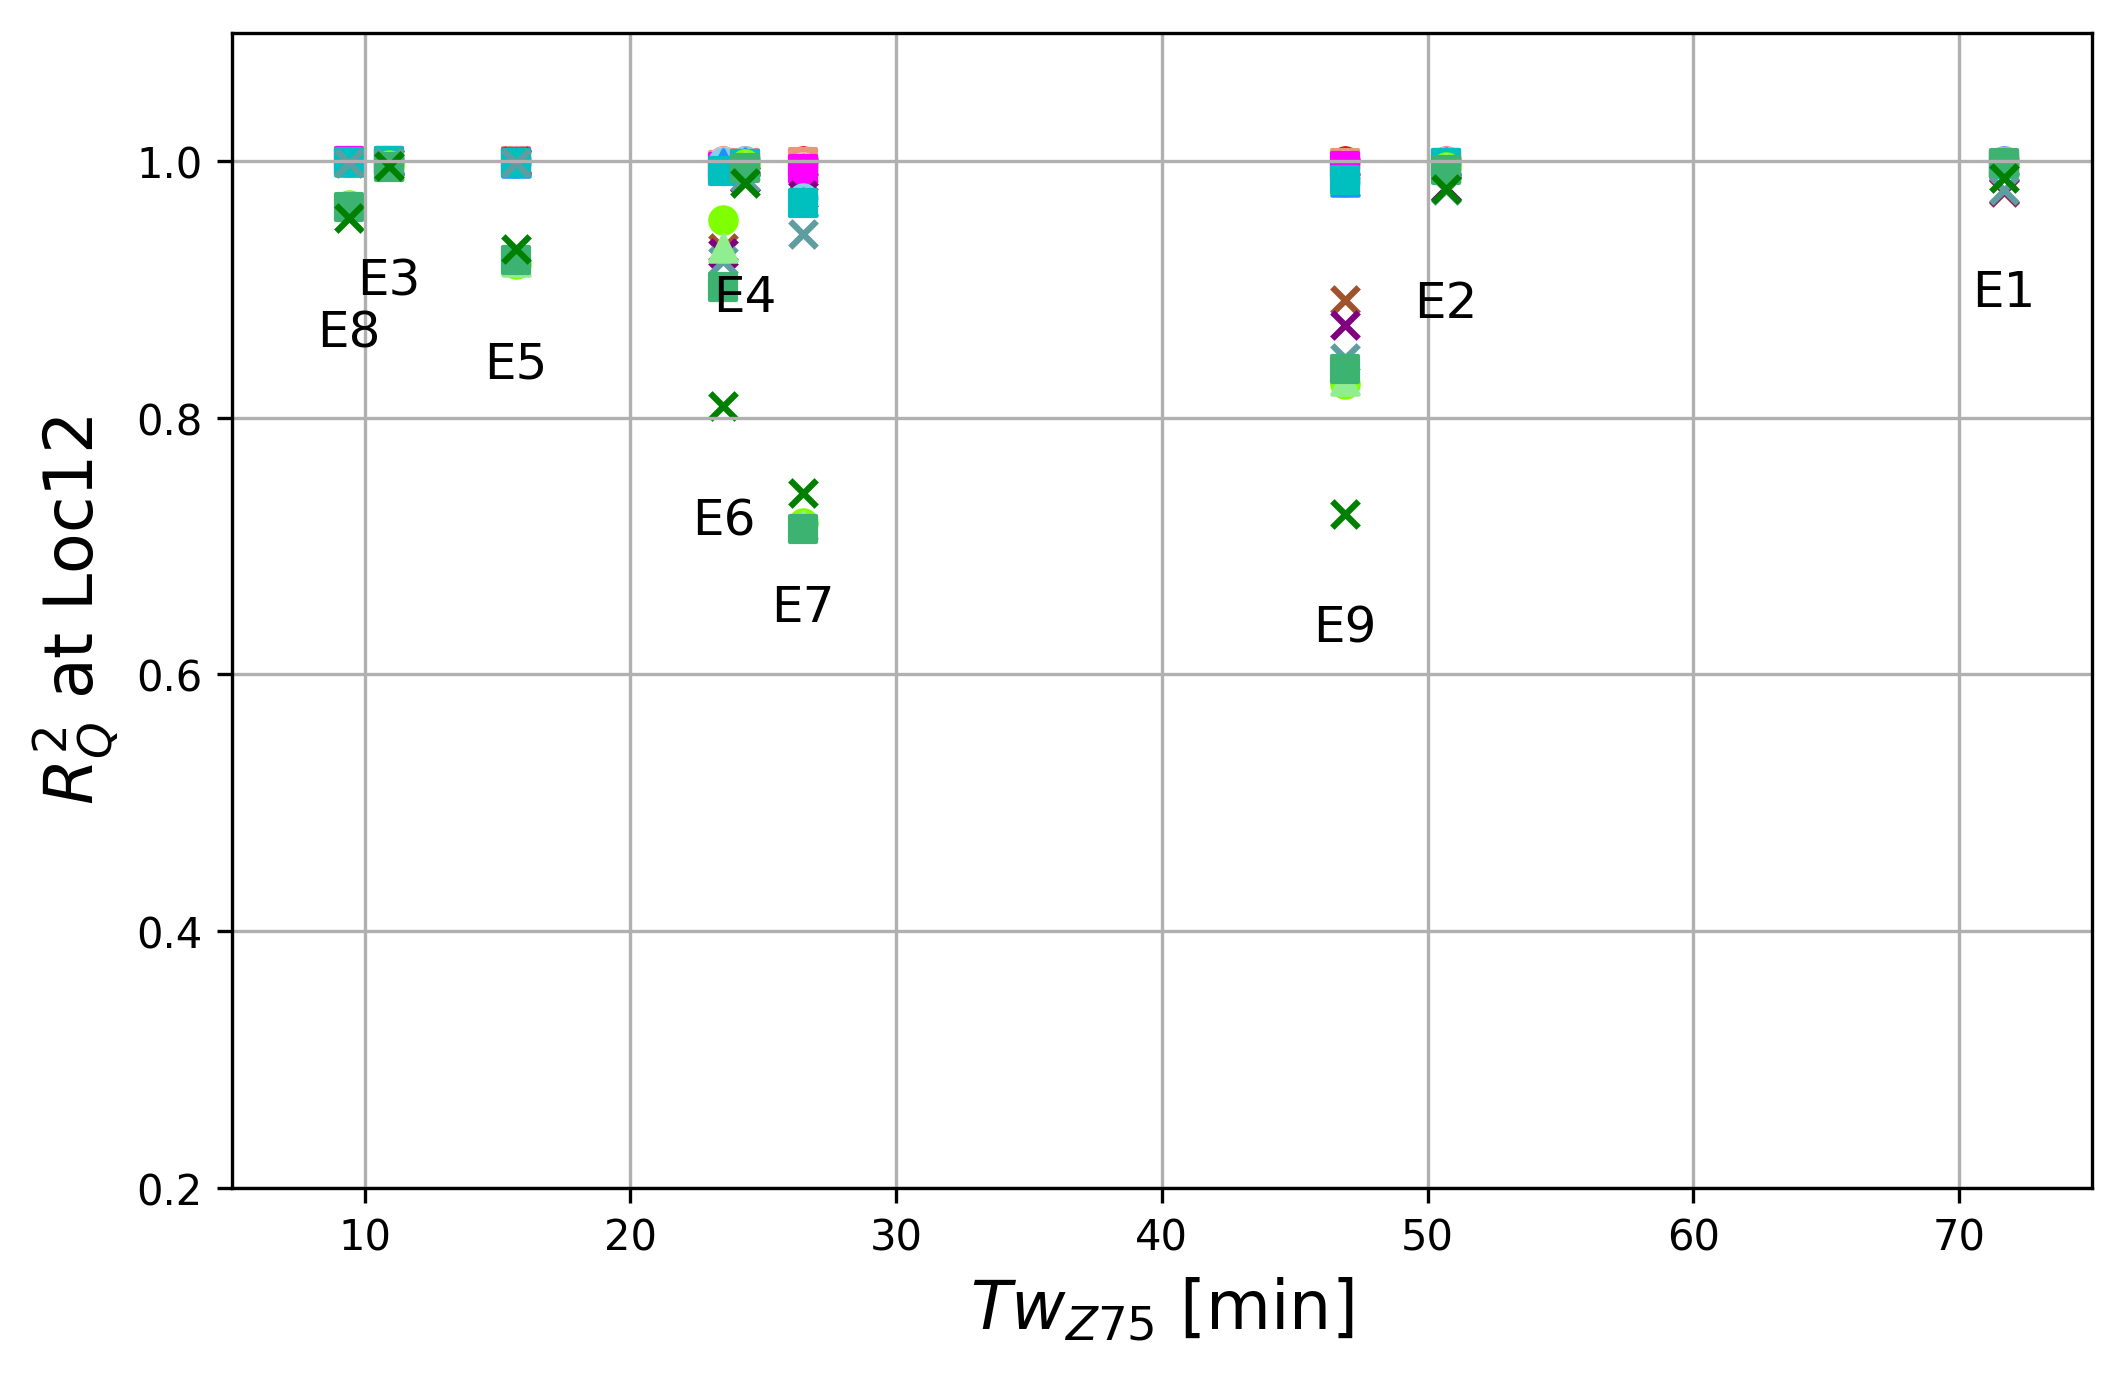

Supplement: Supplementary file 1 [file hess-22-2425-2018-supplement.zip › Order/R2_T7plus_loc12.png]

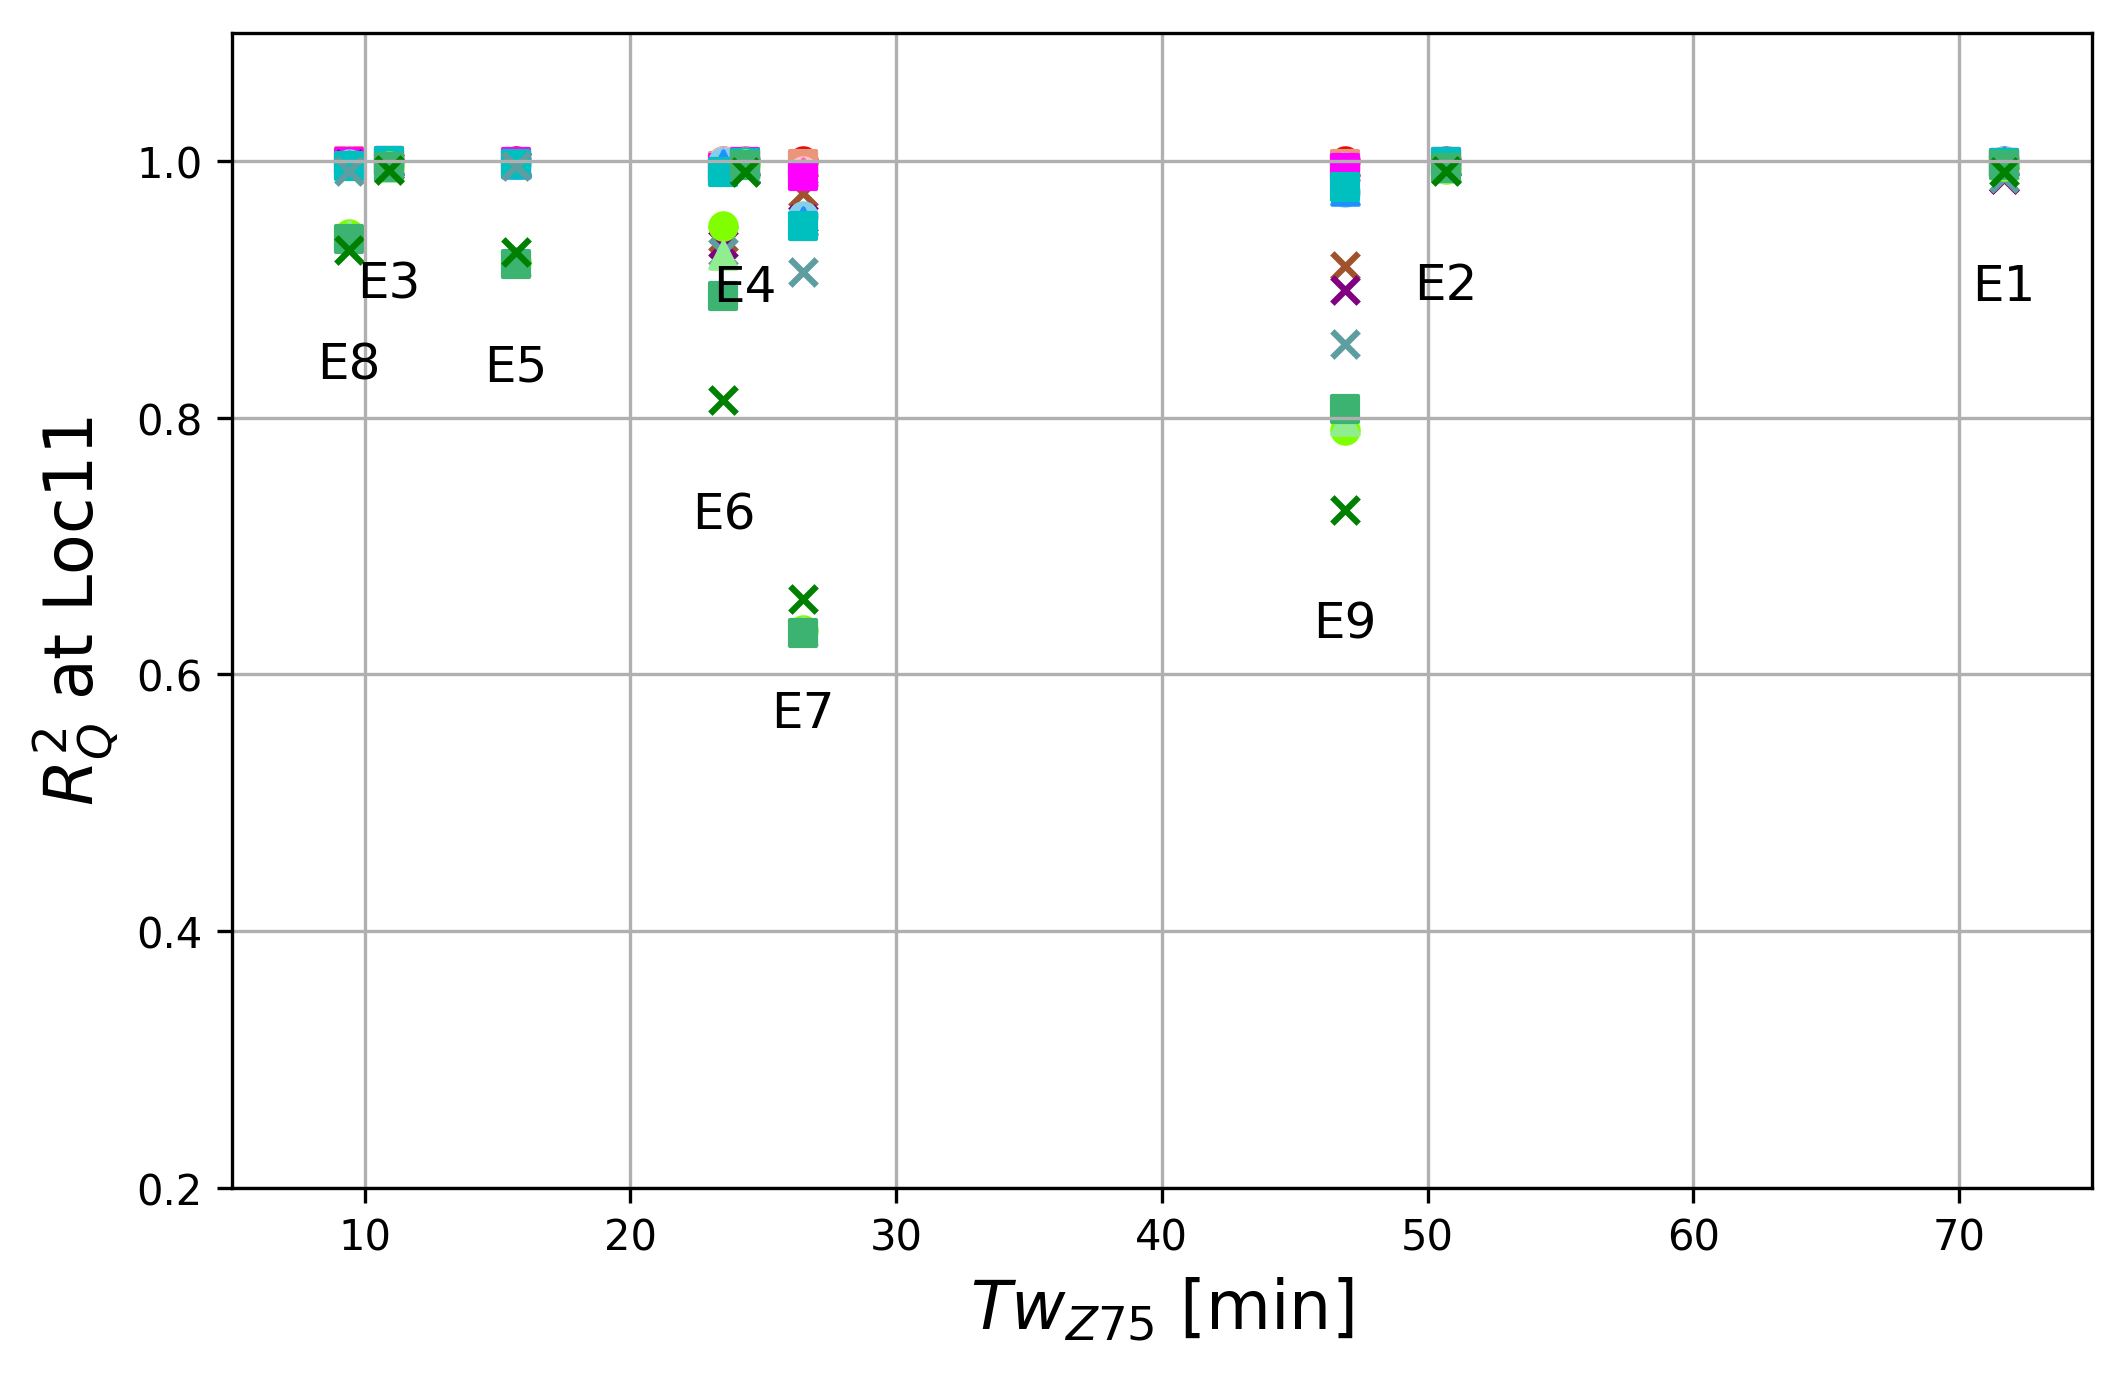

Supplement: Supplementary file 1 [file hess-22-2425-2018-supplement.zip › Order/R2_T7plus_loc11.png]

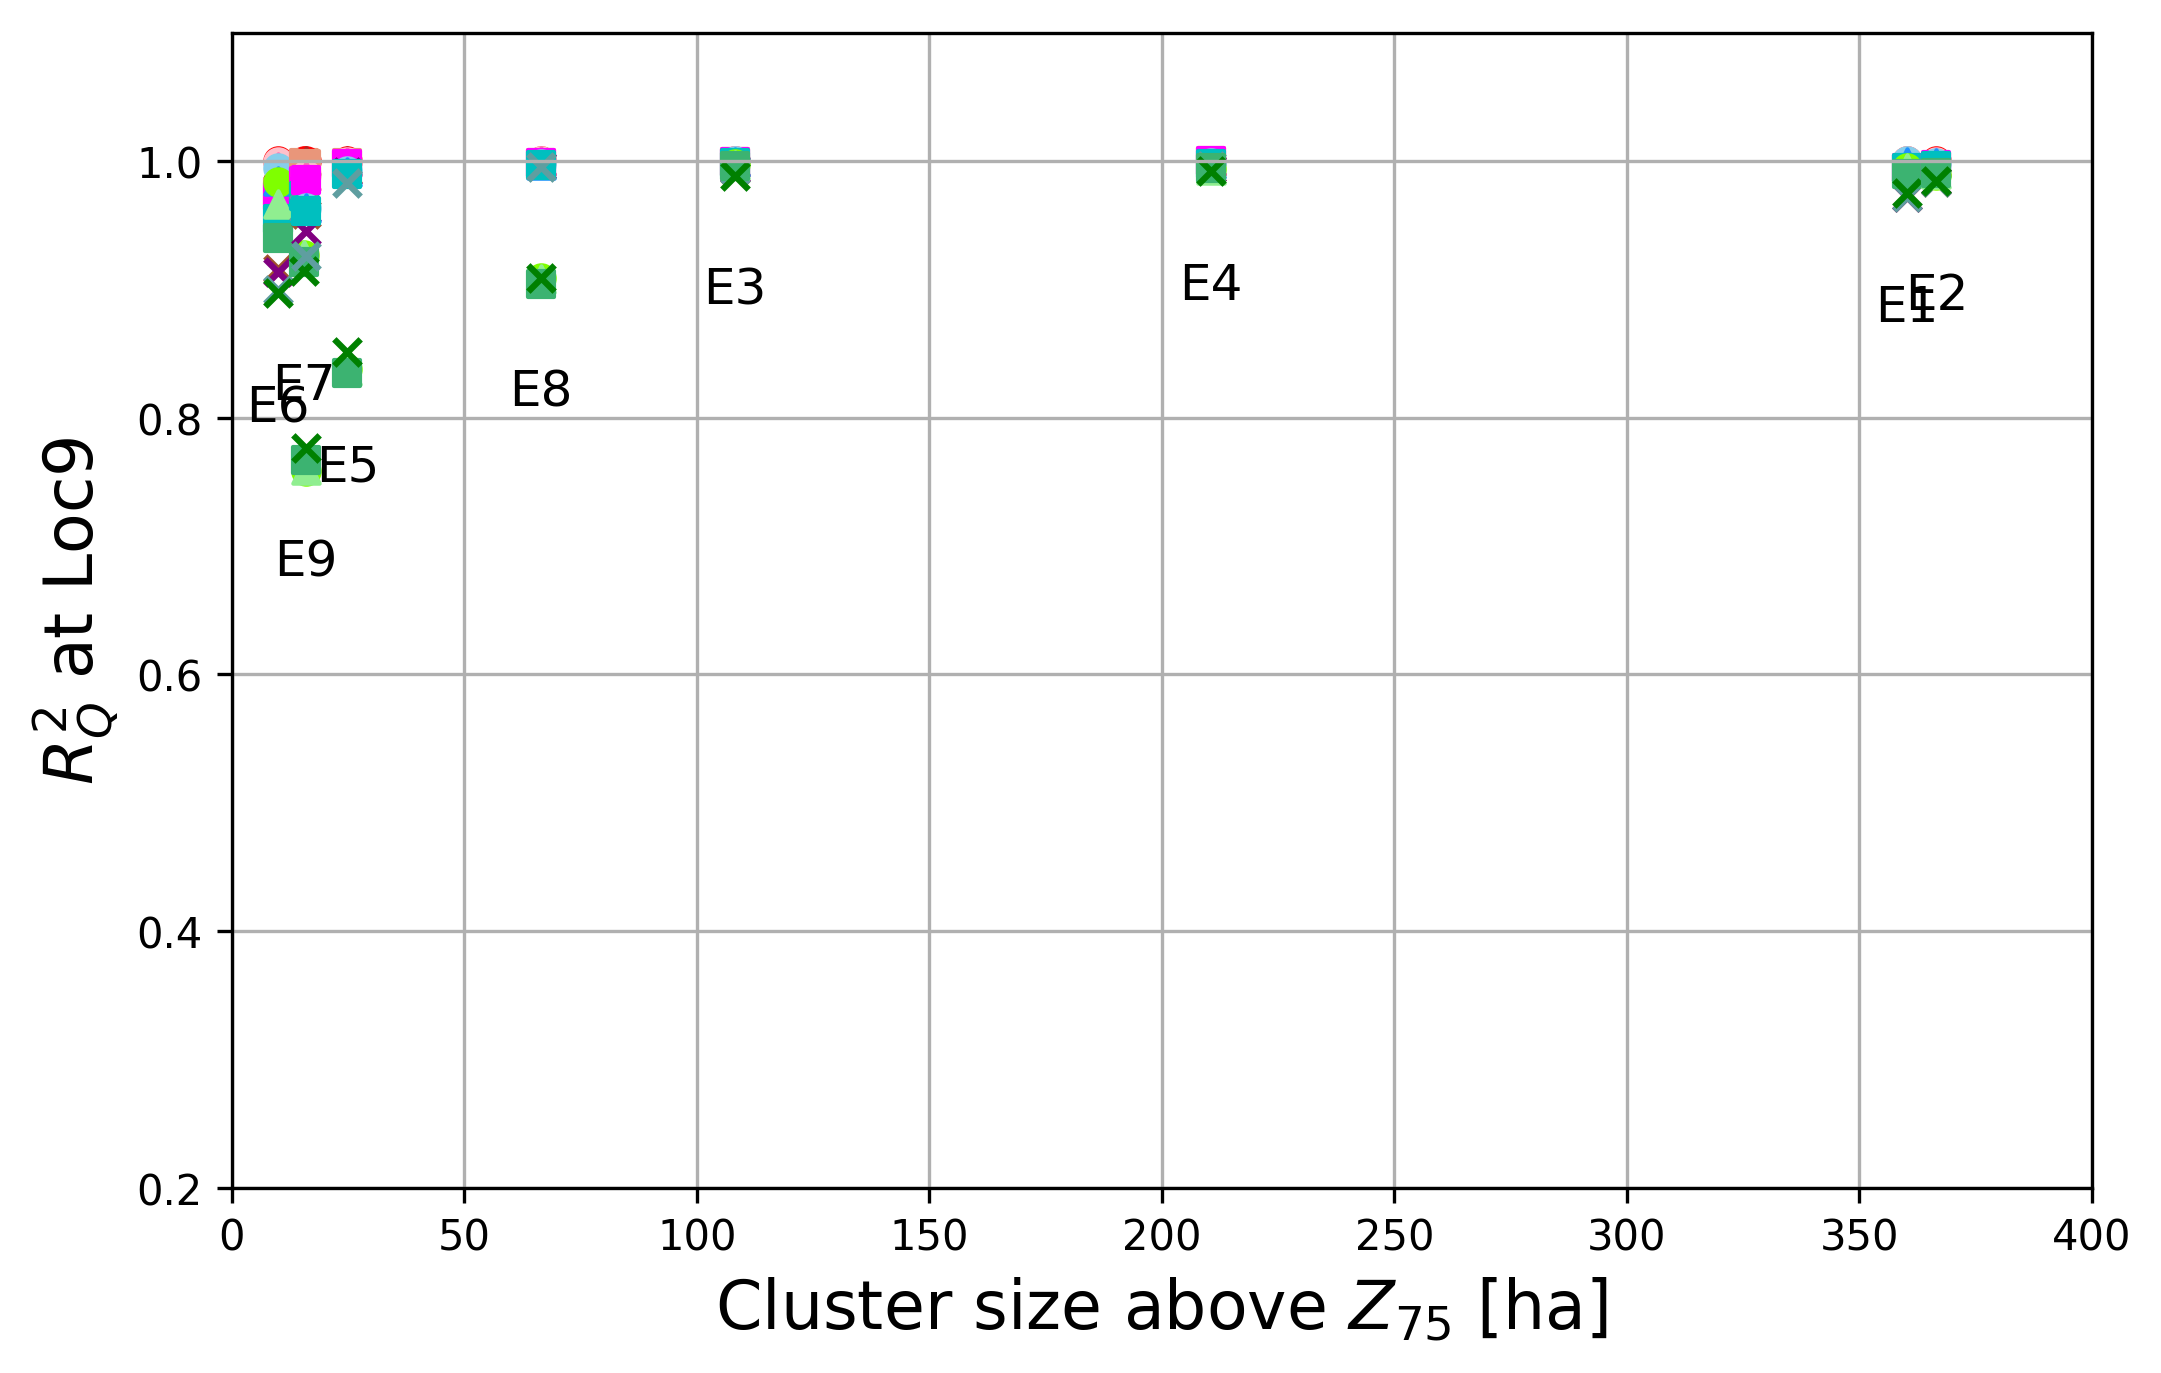

Supplement: Supplementary file 1 [file hess-22-2425-2018-supplement.zip › Order/R2_S7_loc9.png]

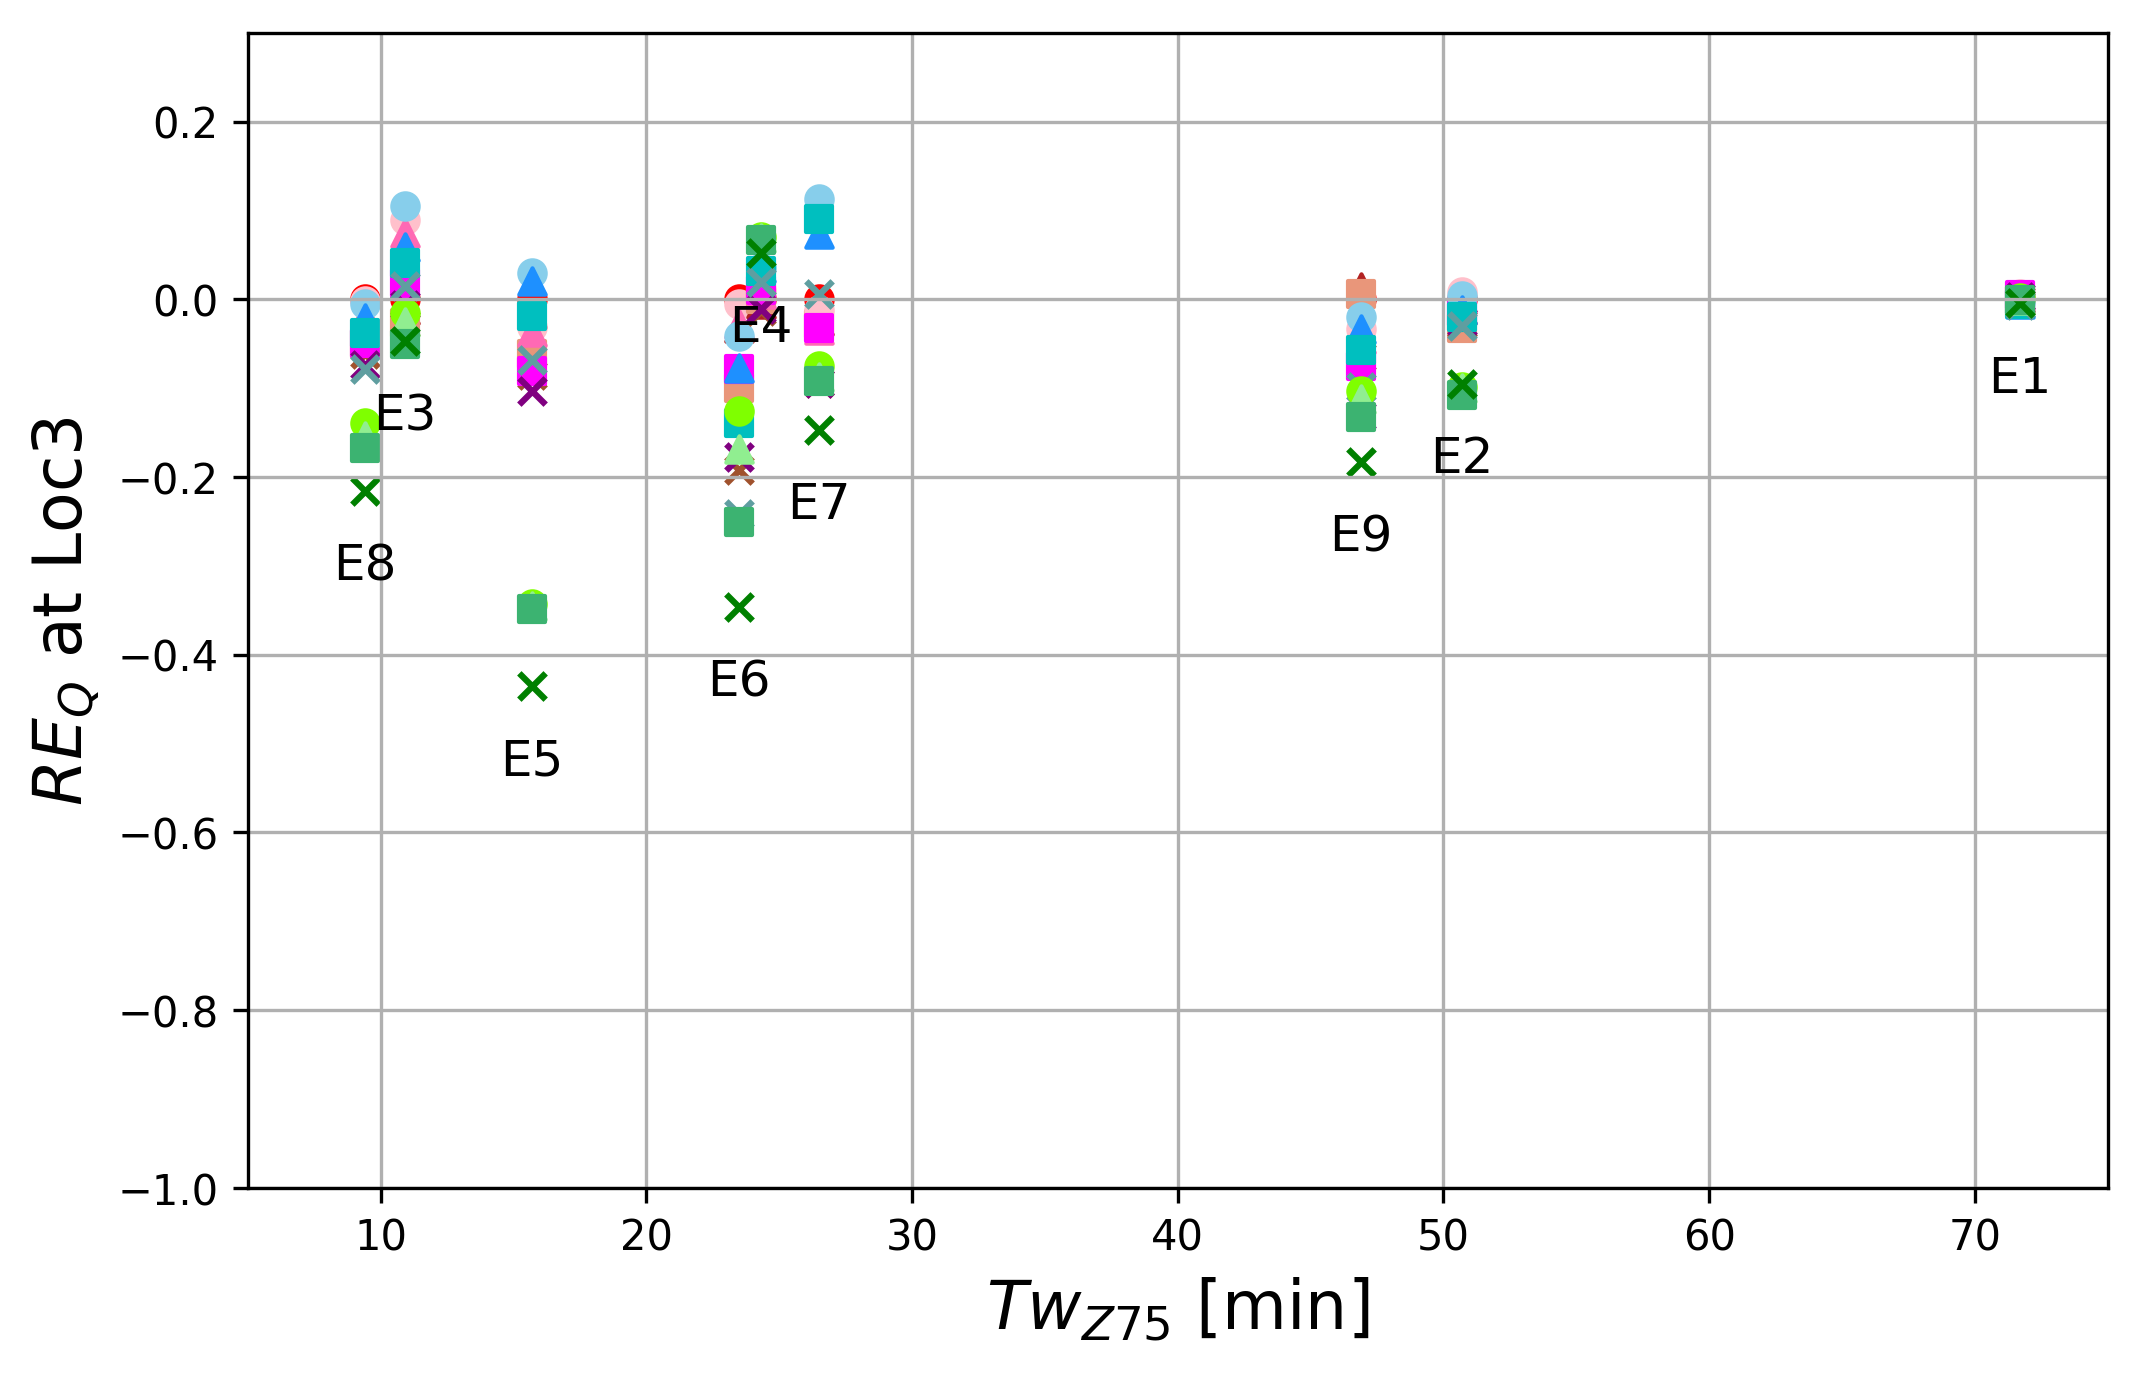

Supplement: Supplementary file 1 [file hess-22-2425-2018-supplement.zip › Order/RE_T7plus_loc3.png]

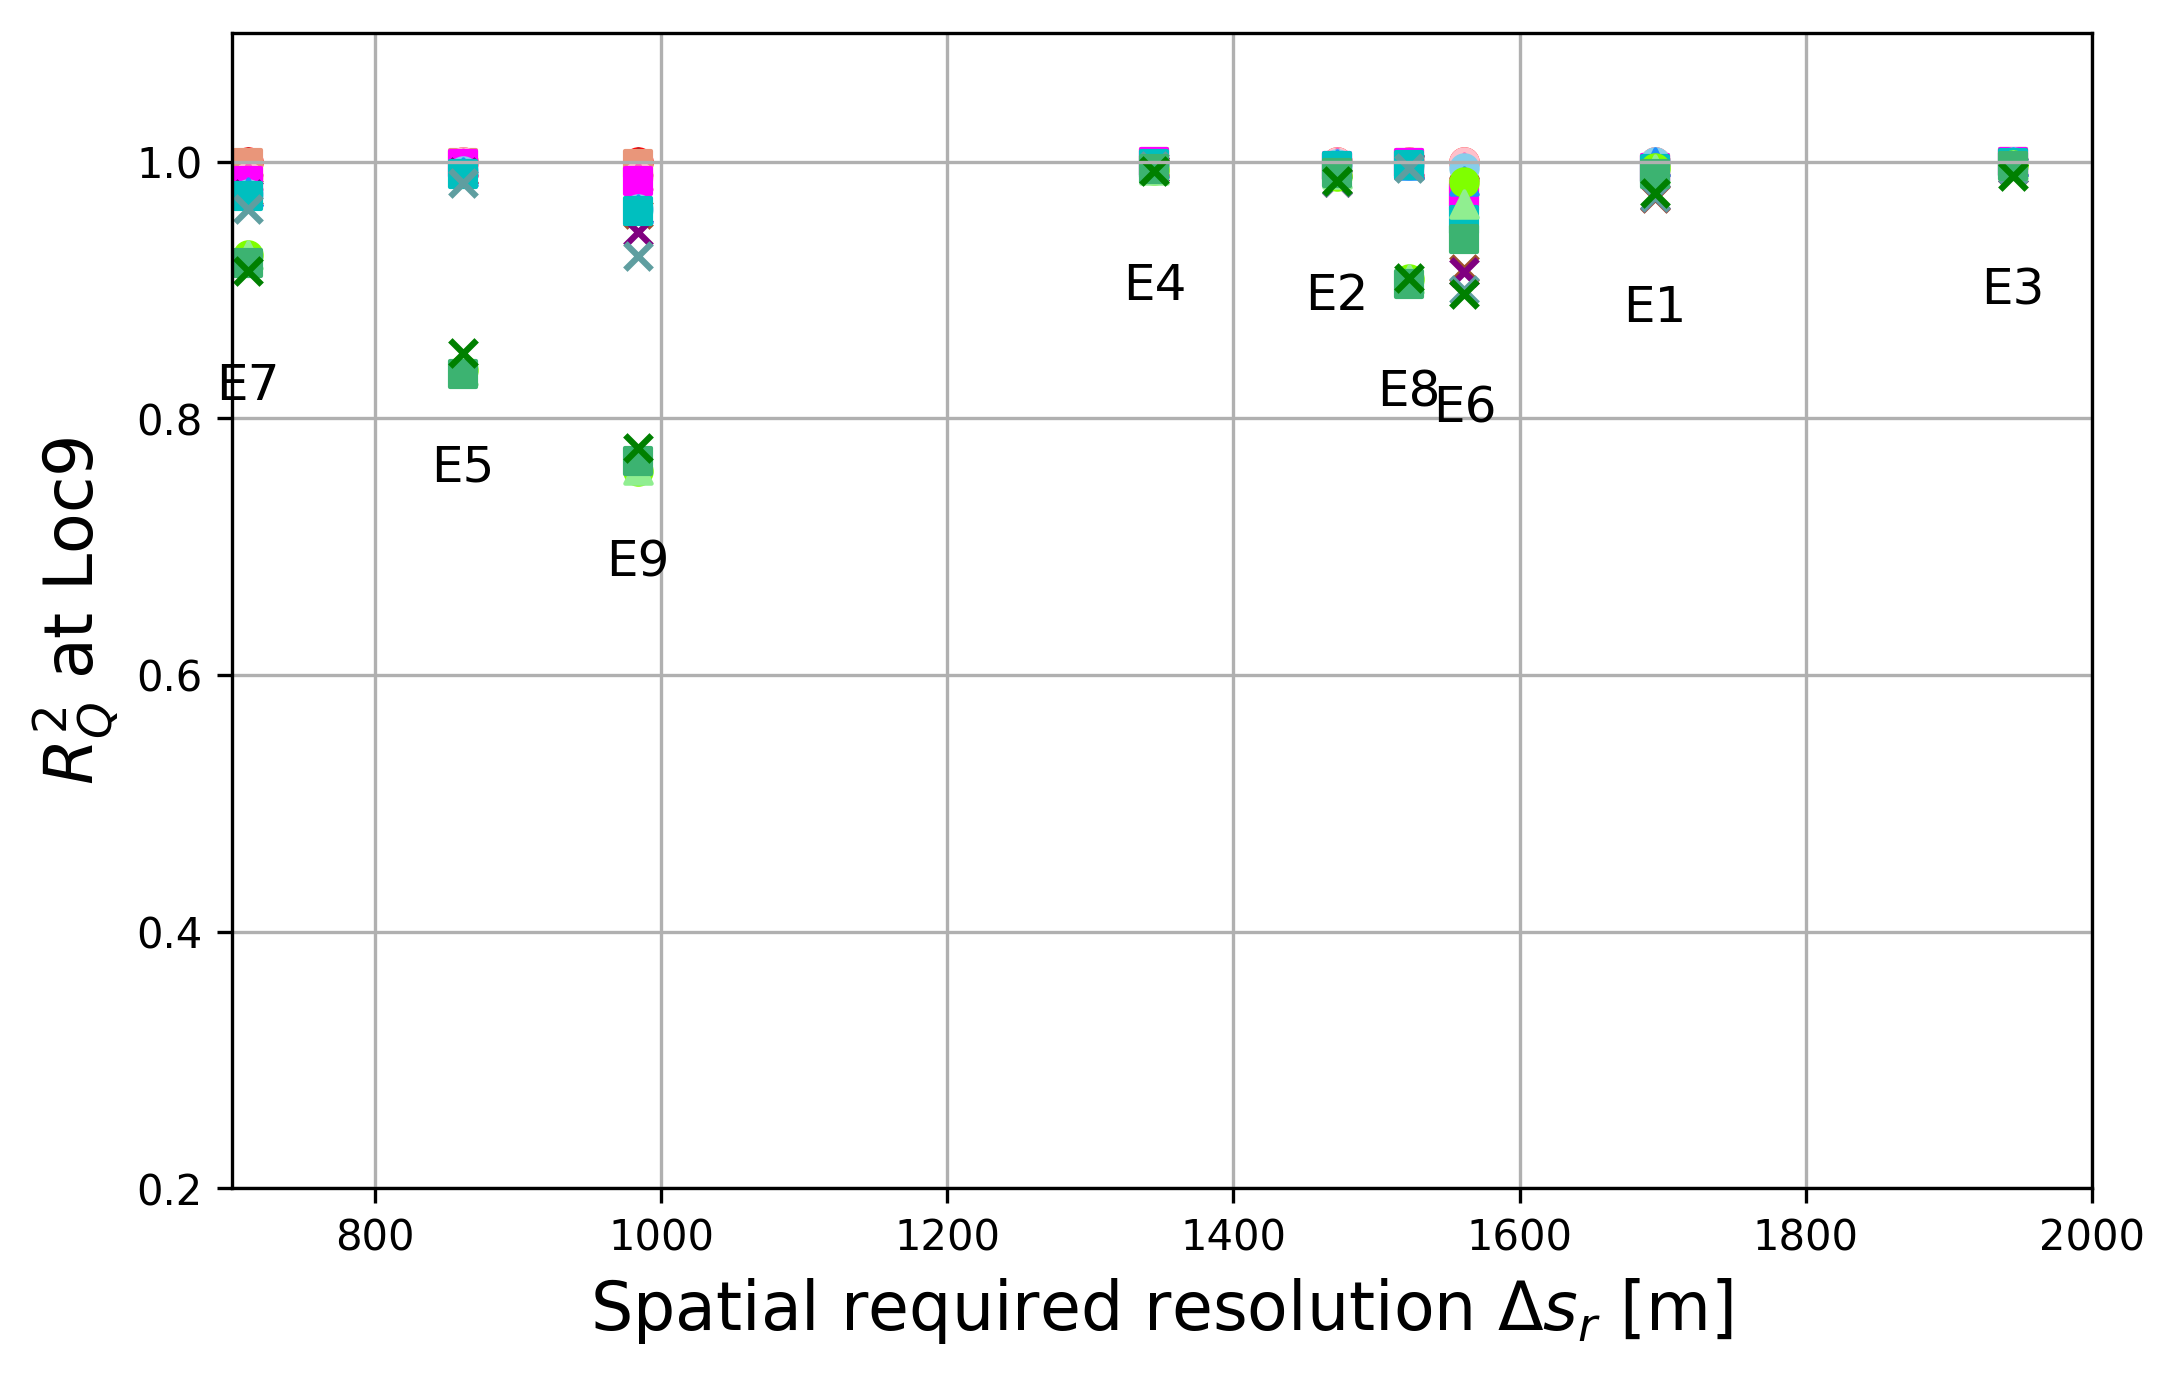

Supplement: Supplementary file 1 [file hess-22-2425-2018-supplement.zip › Order/R2_OchoaS_loc9.png]

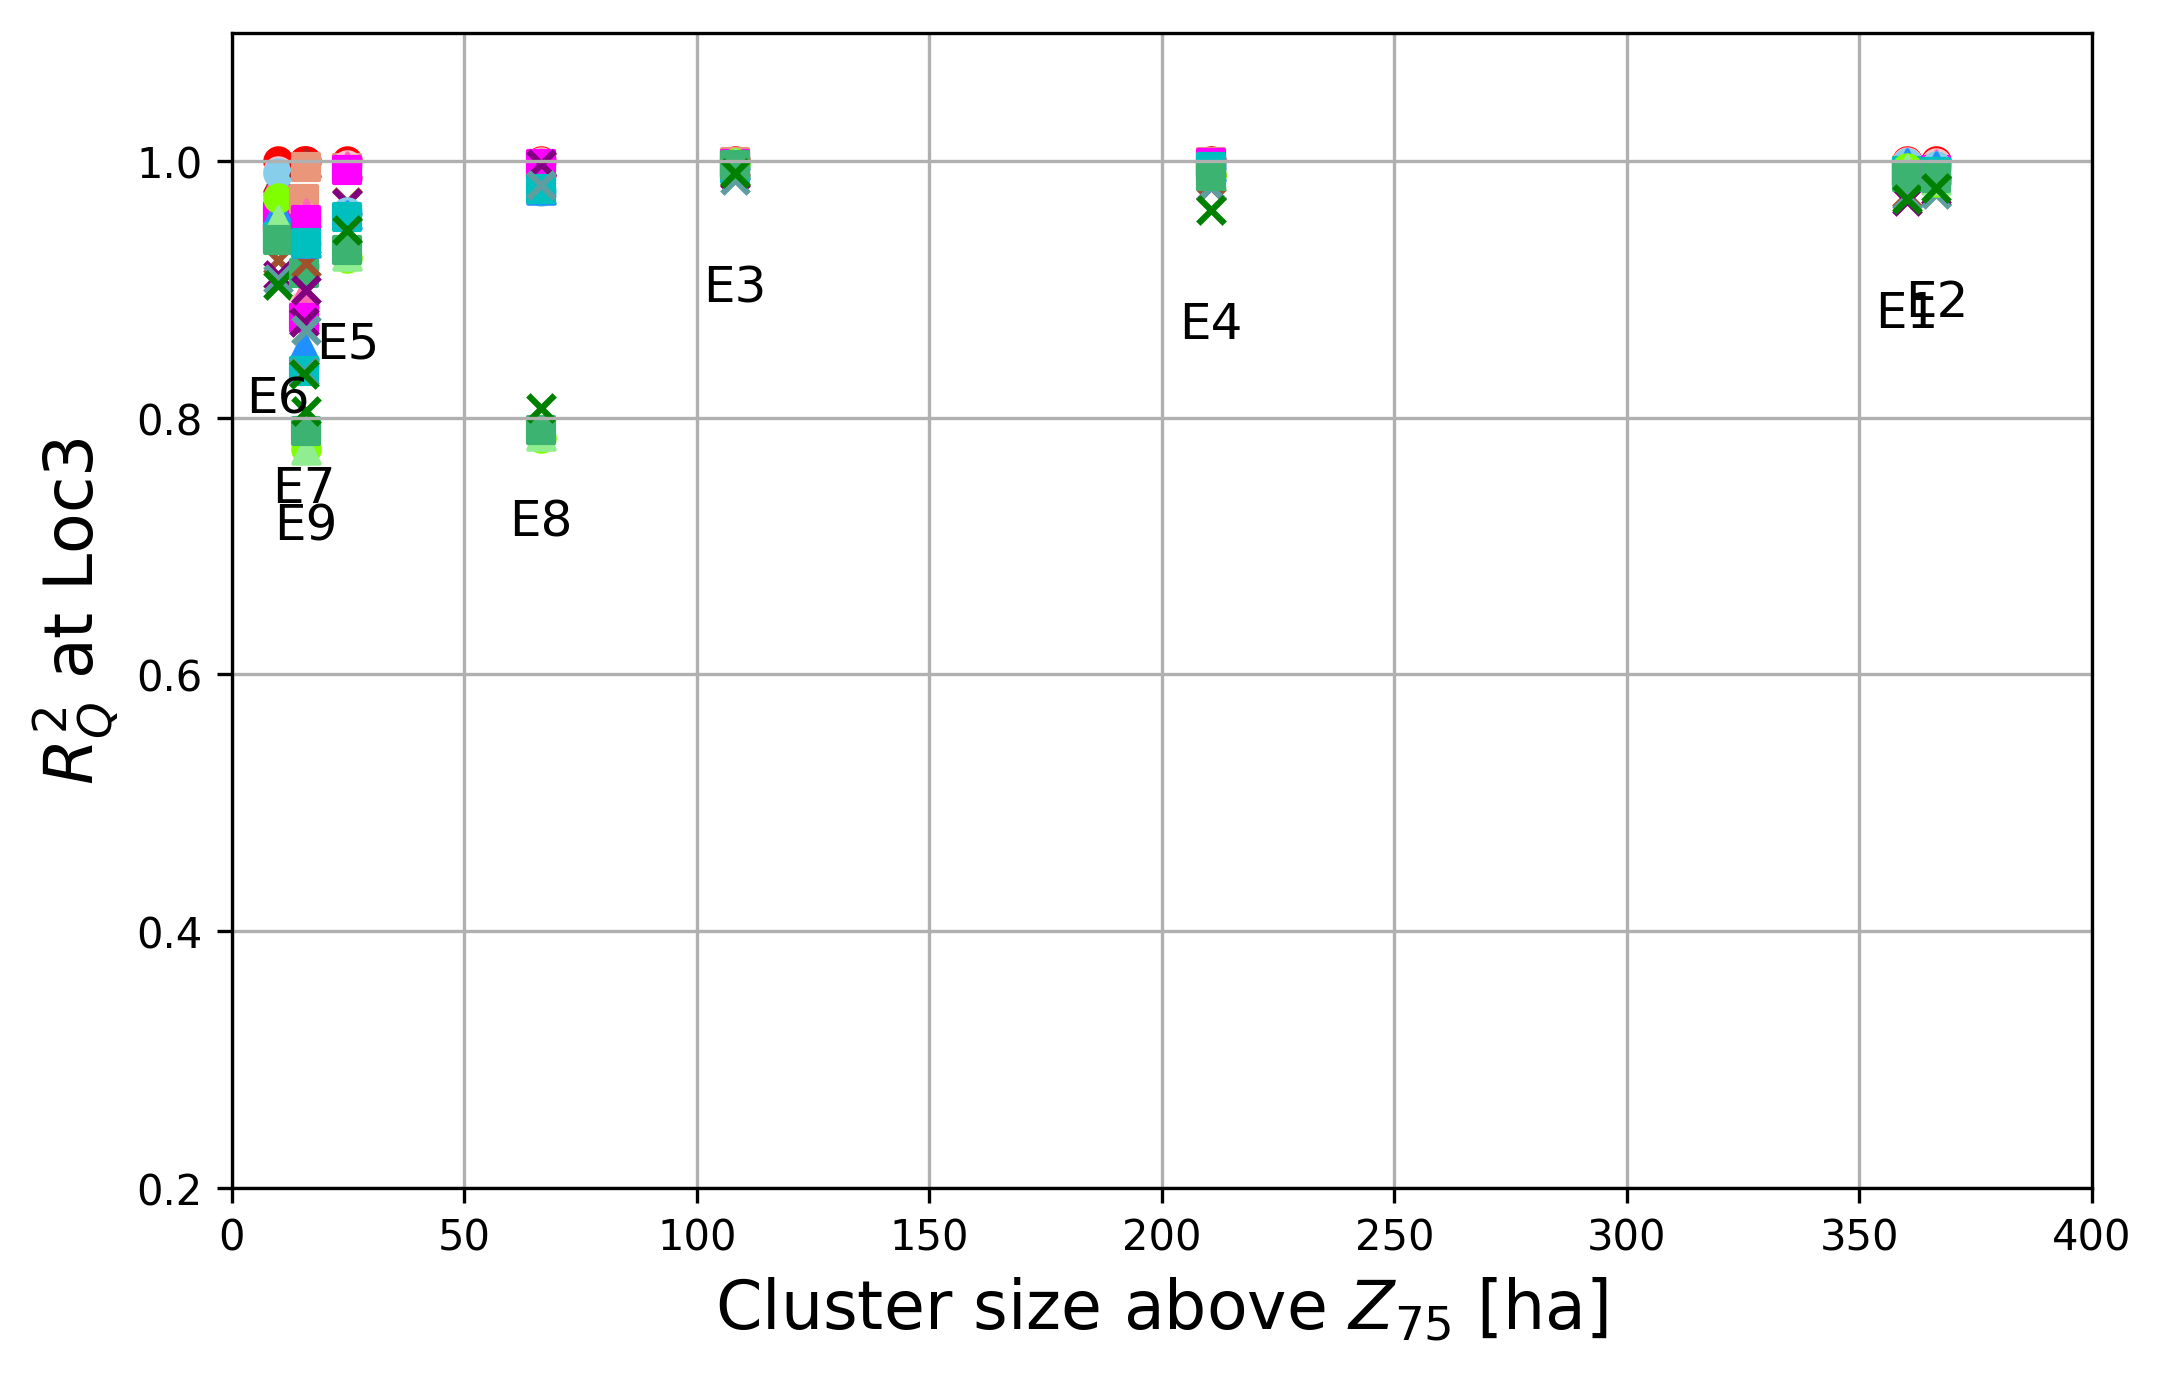

Supplement: Supplementary file 1 [file hess-22-2425-2018-supplement.zip › Order/R2_S7_loc3.png]

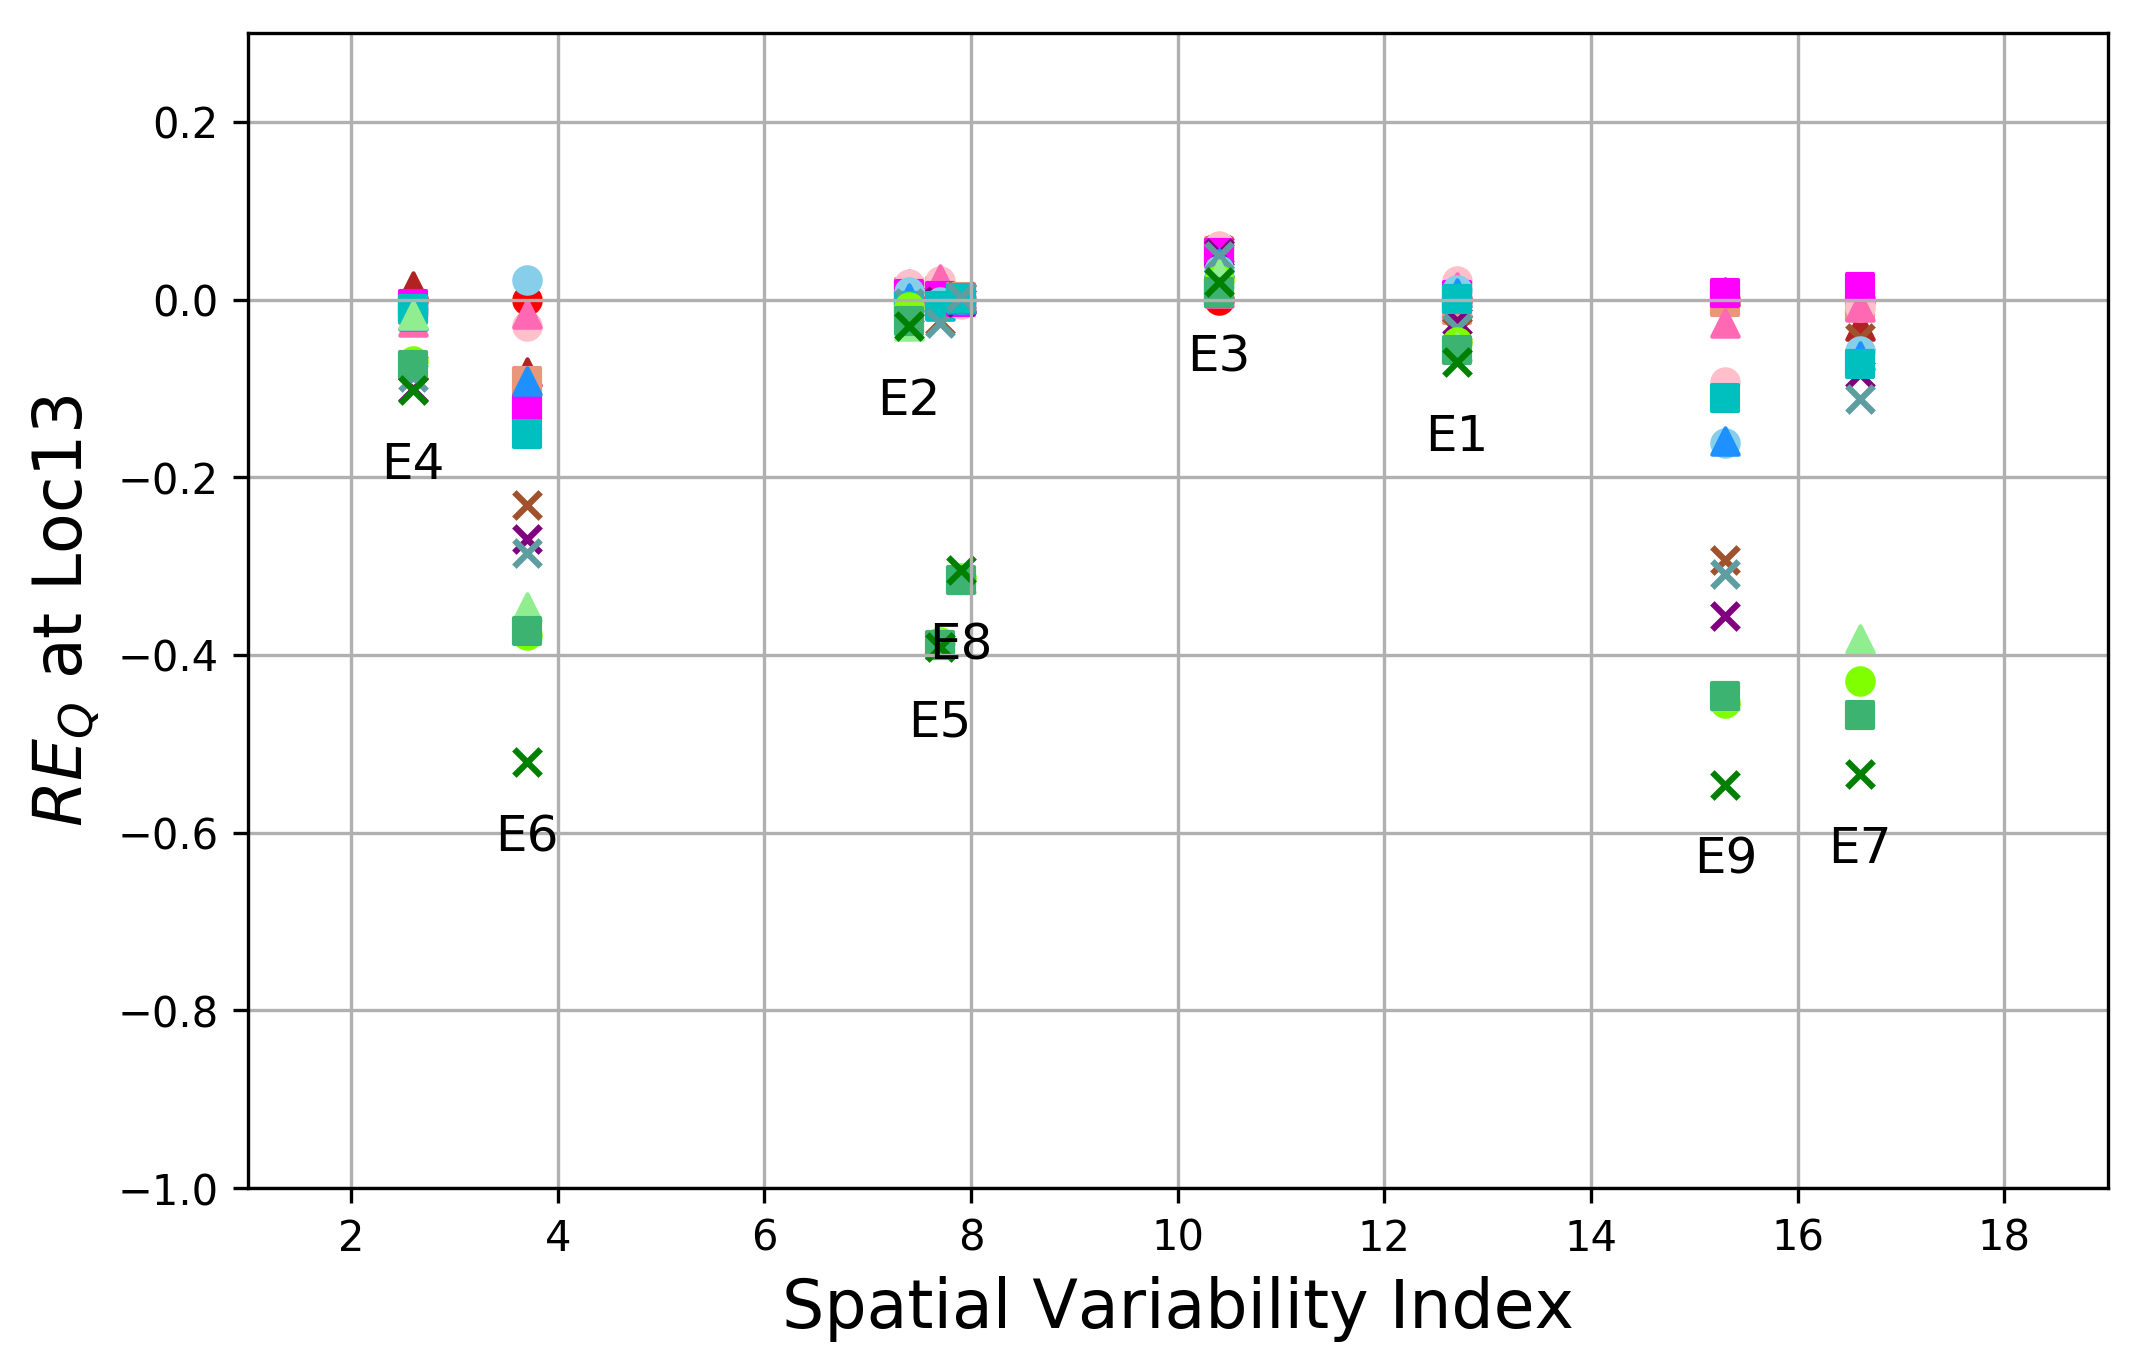

Supplement: Supplementary file 1 [file hess-22-2425-2018-supplement.zip › Order/RE_SVI_loc13.png]

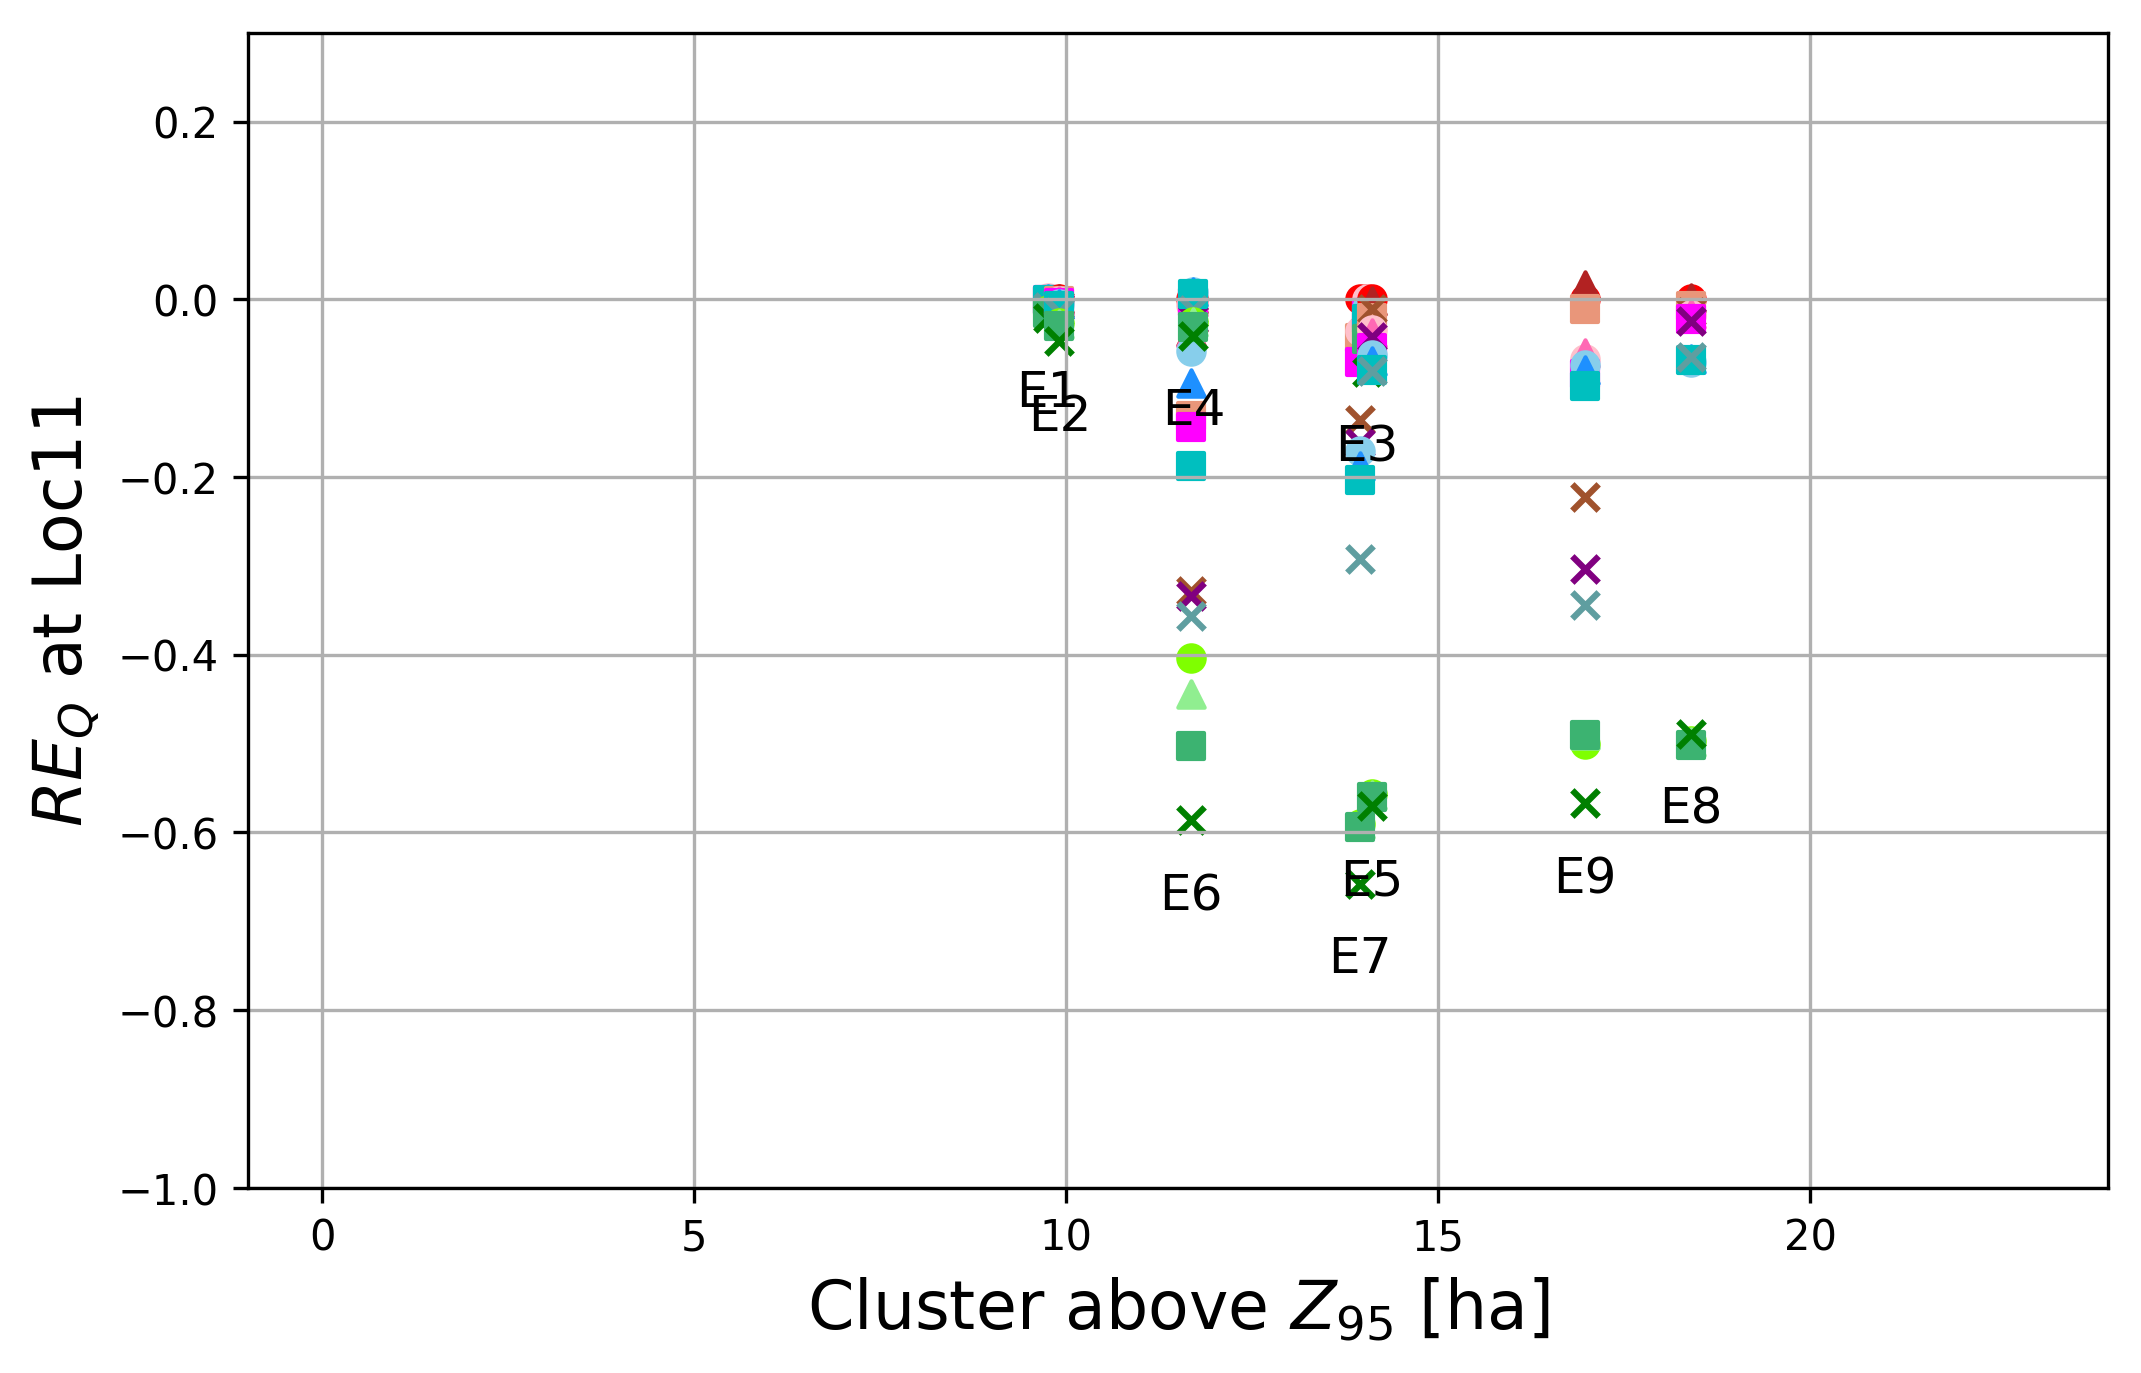

Supplement: Supplementary file 1 [file hess-22-2425-2018-supplement.zip › Order/RE_S22_loc11.png]

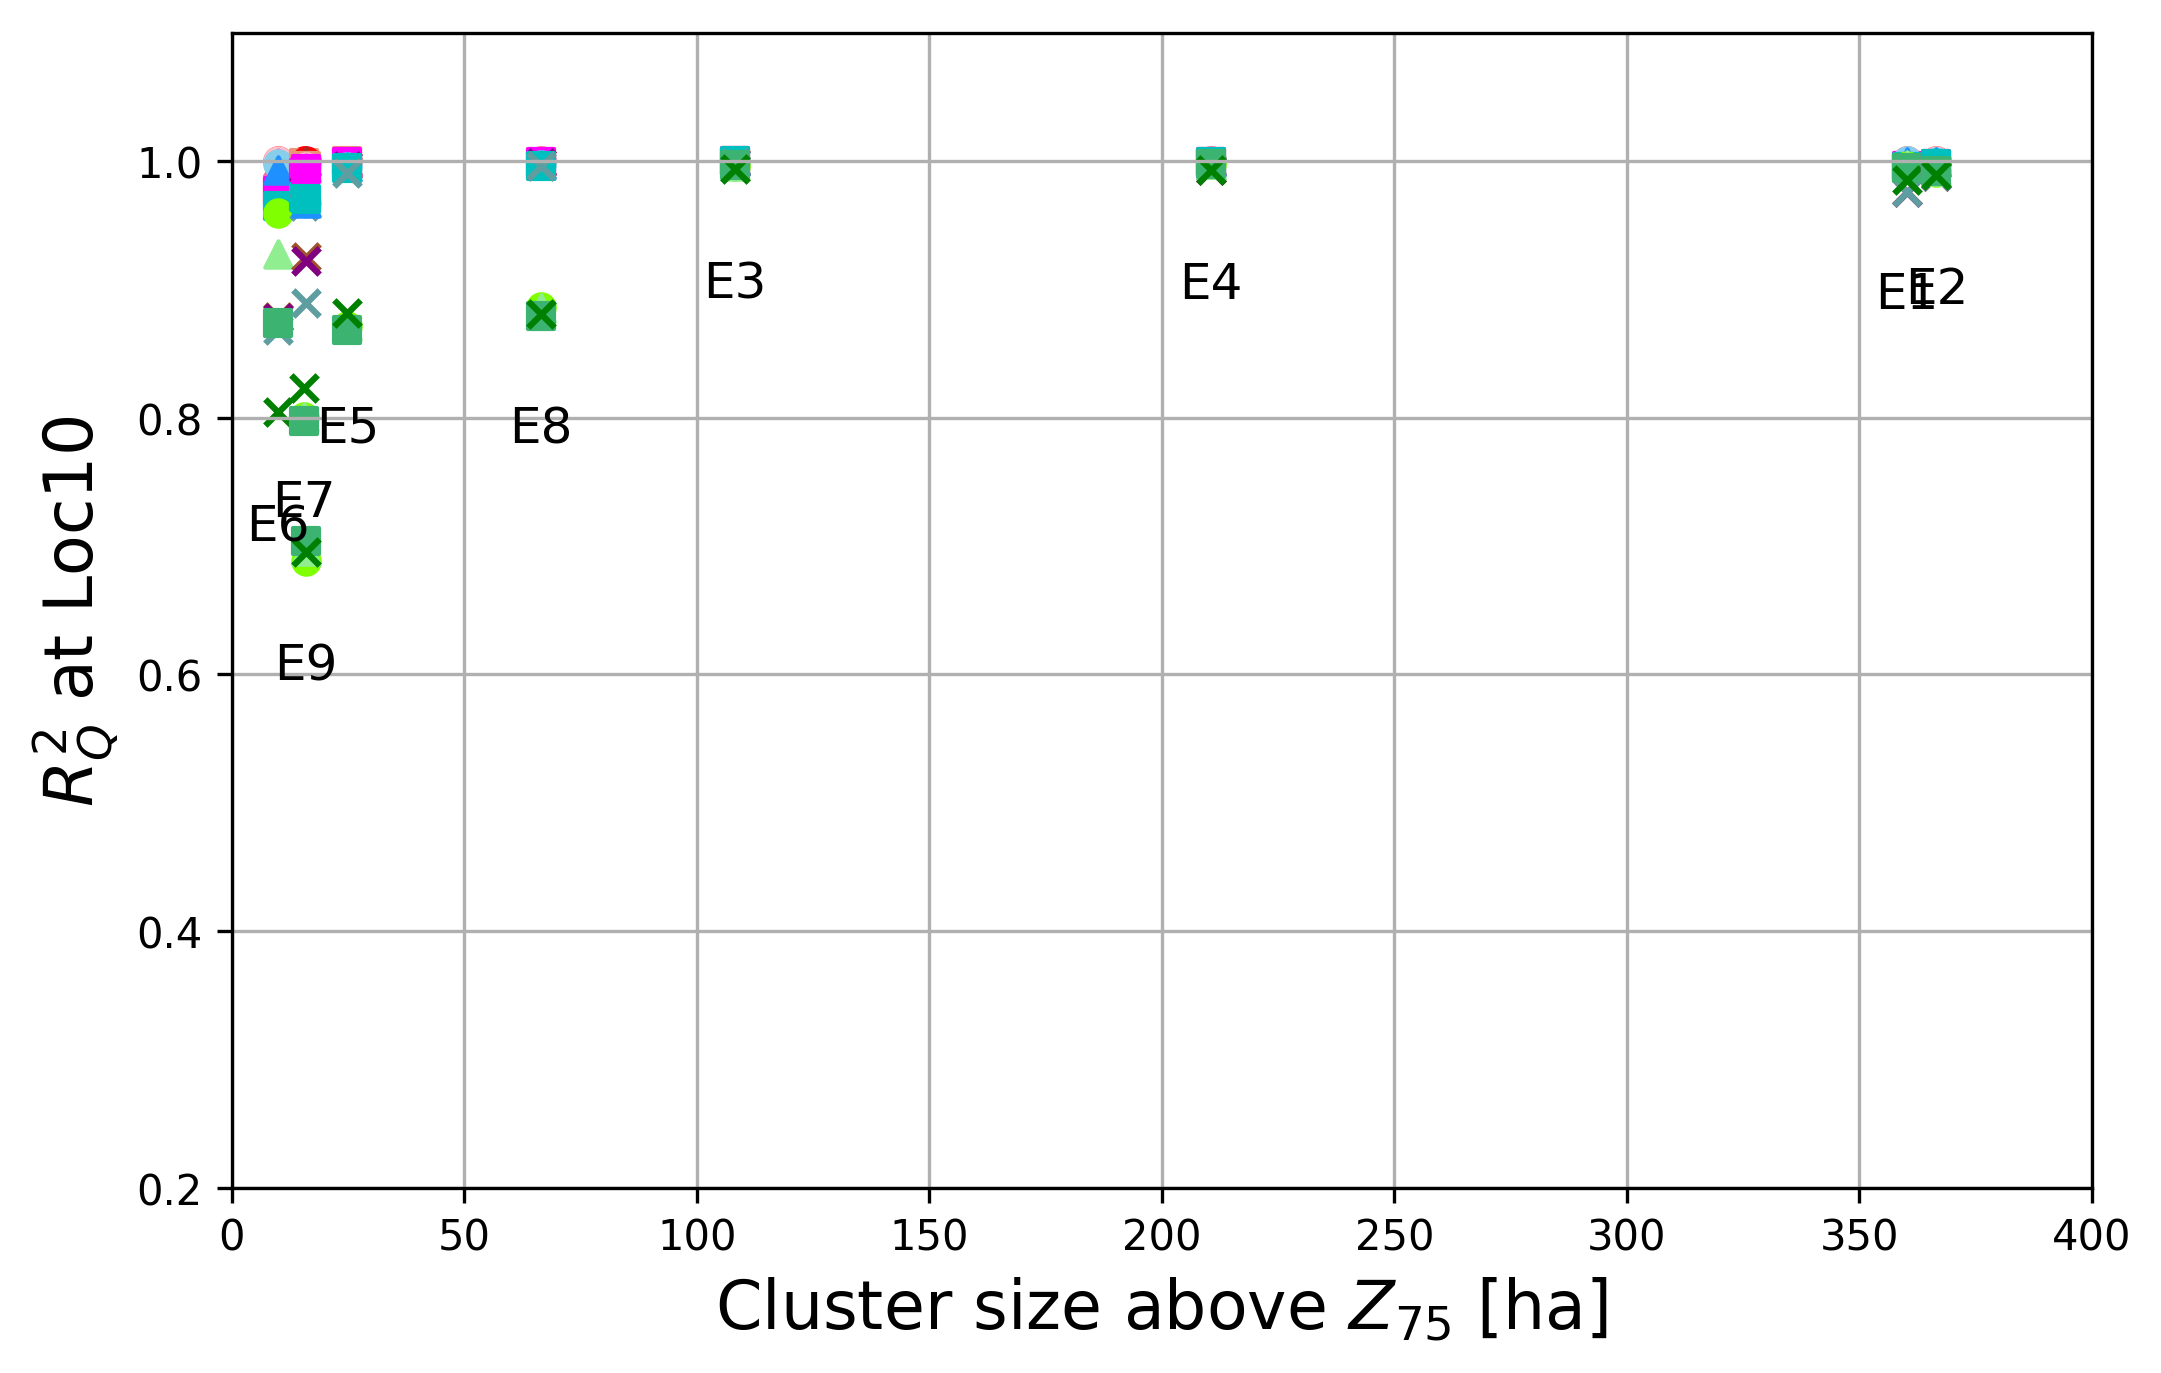

Supplement: Supplementary file 1 [file hess-22-2425-2018-supplement.zip › Order/R2_S7_loc10.png]

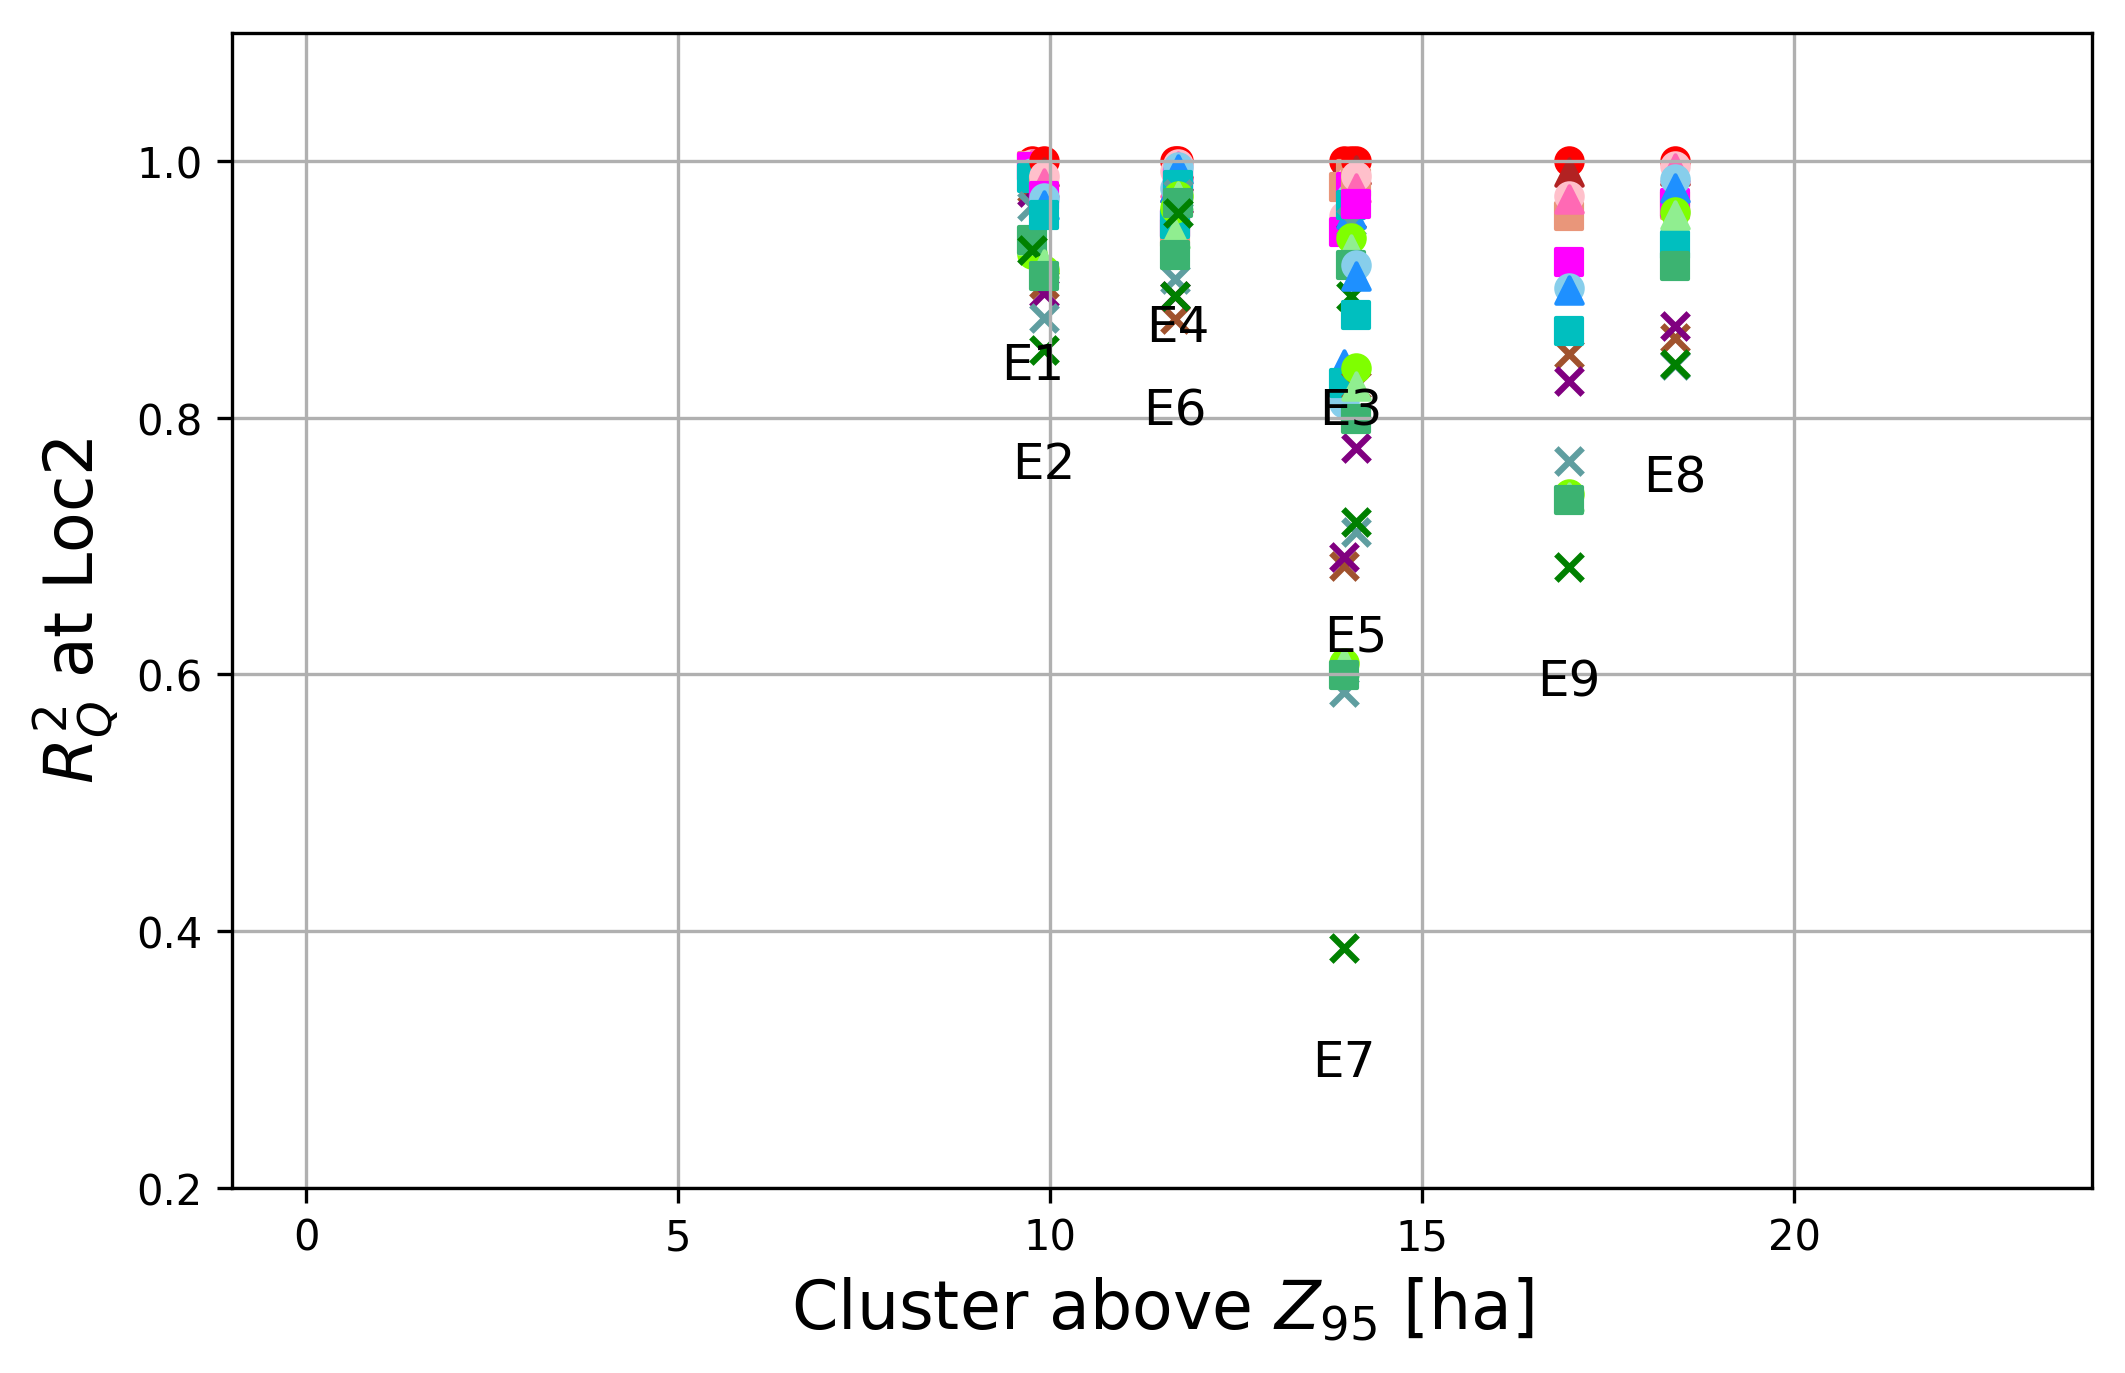

Supplement: Supplementary file 1 [file hess-22-2425-2018-supplement.zip › Order/R2_S22_loc2.png]

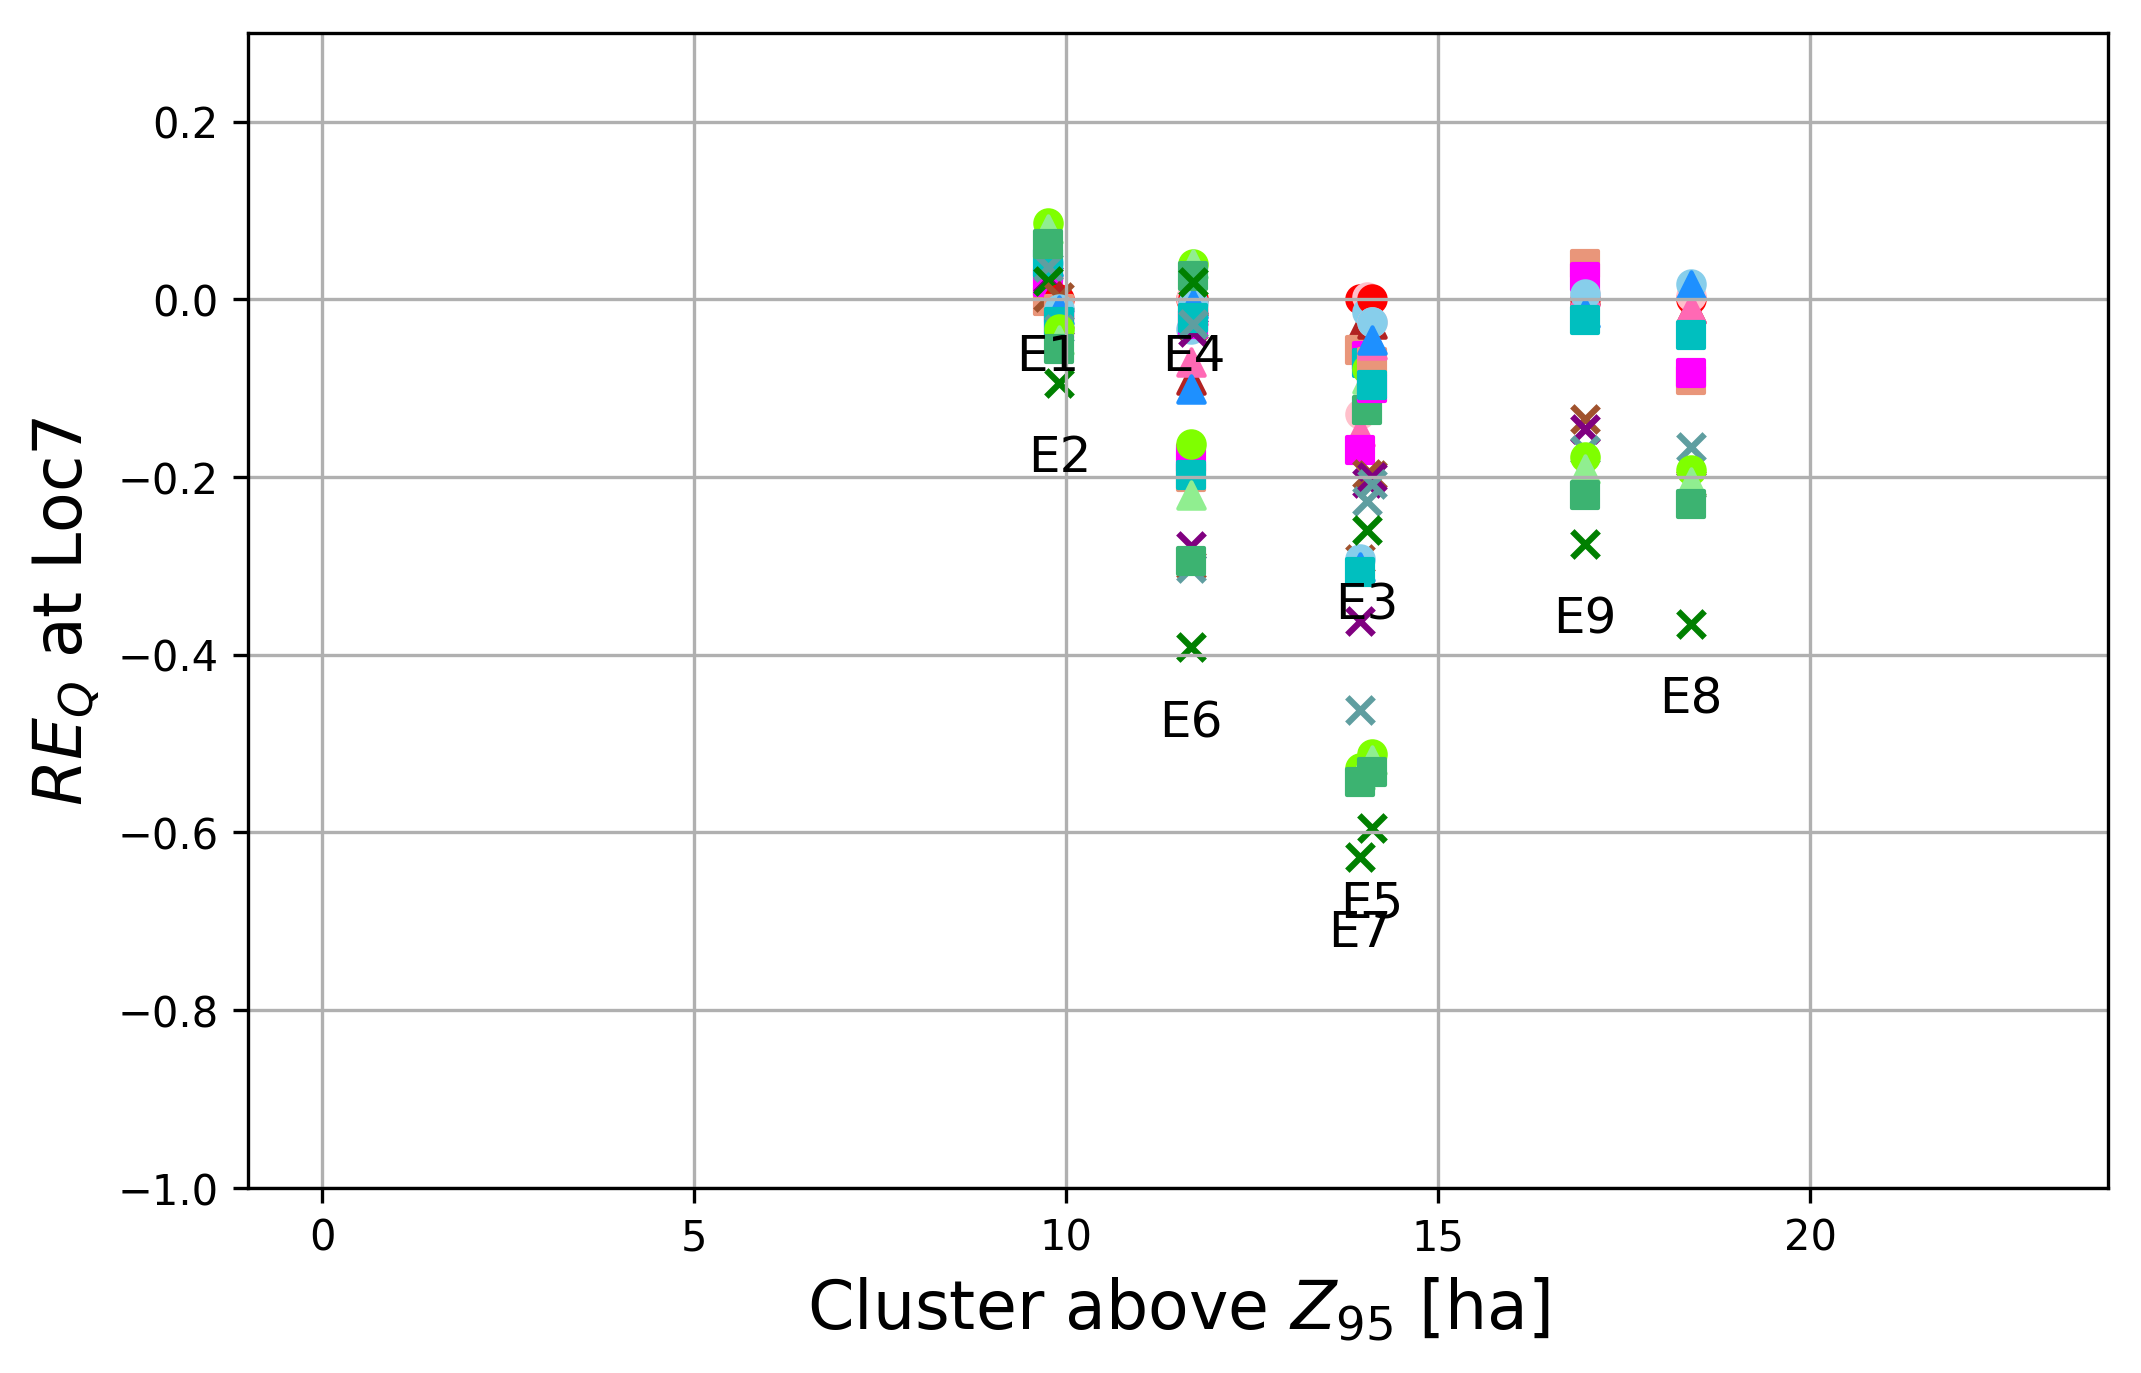

Supplement: Supplementary file 1 [file hess-22-2425-2018-supplement.zip › Order/RE_S22_loc7.png]

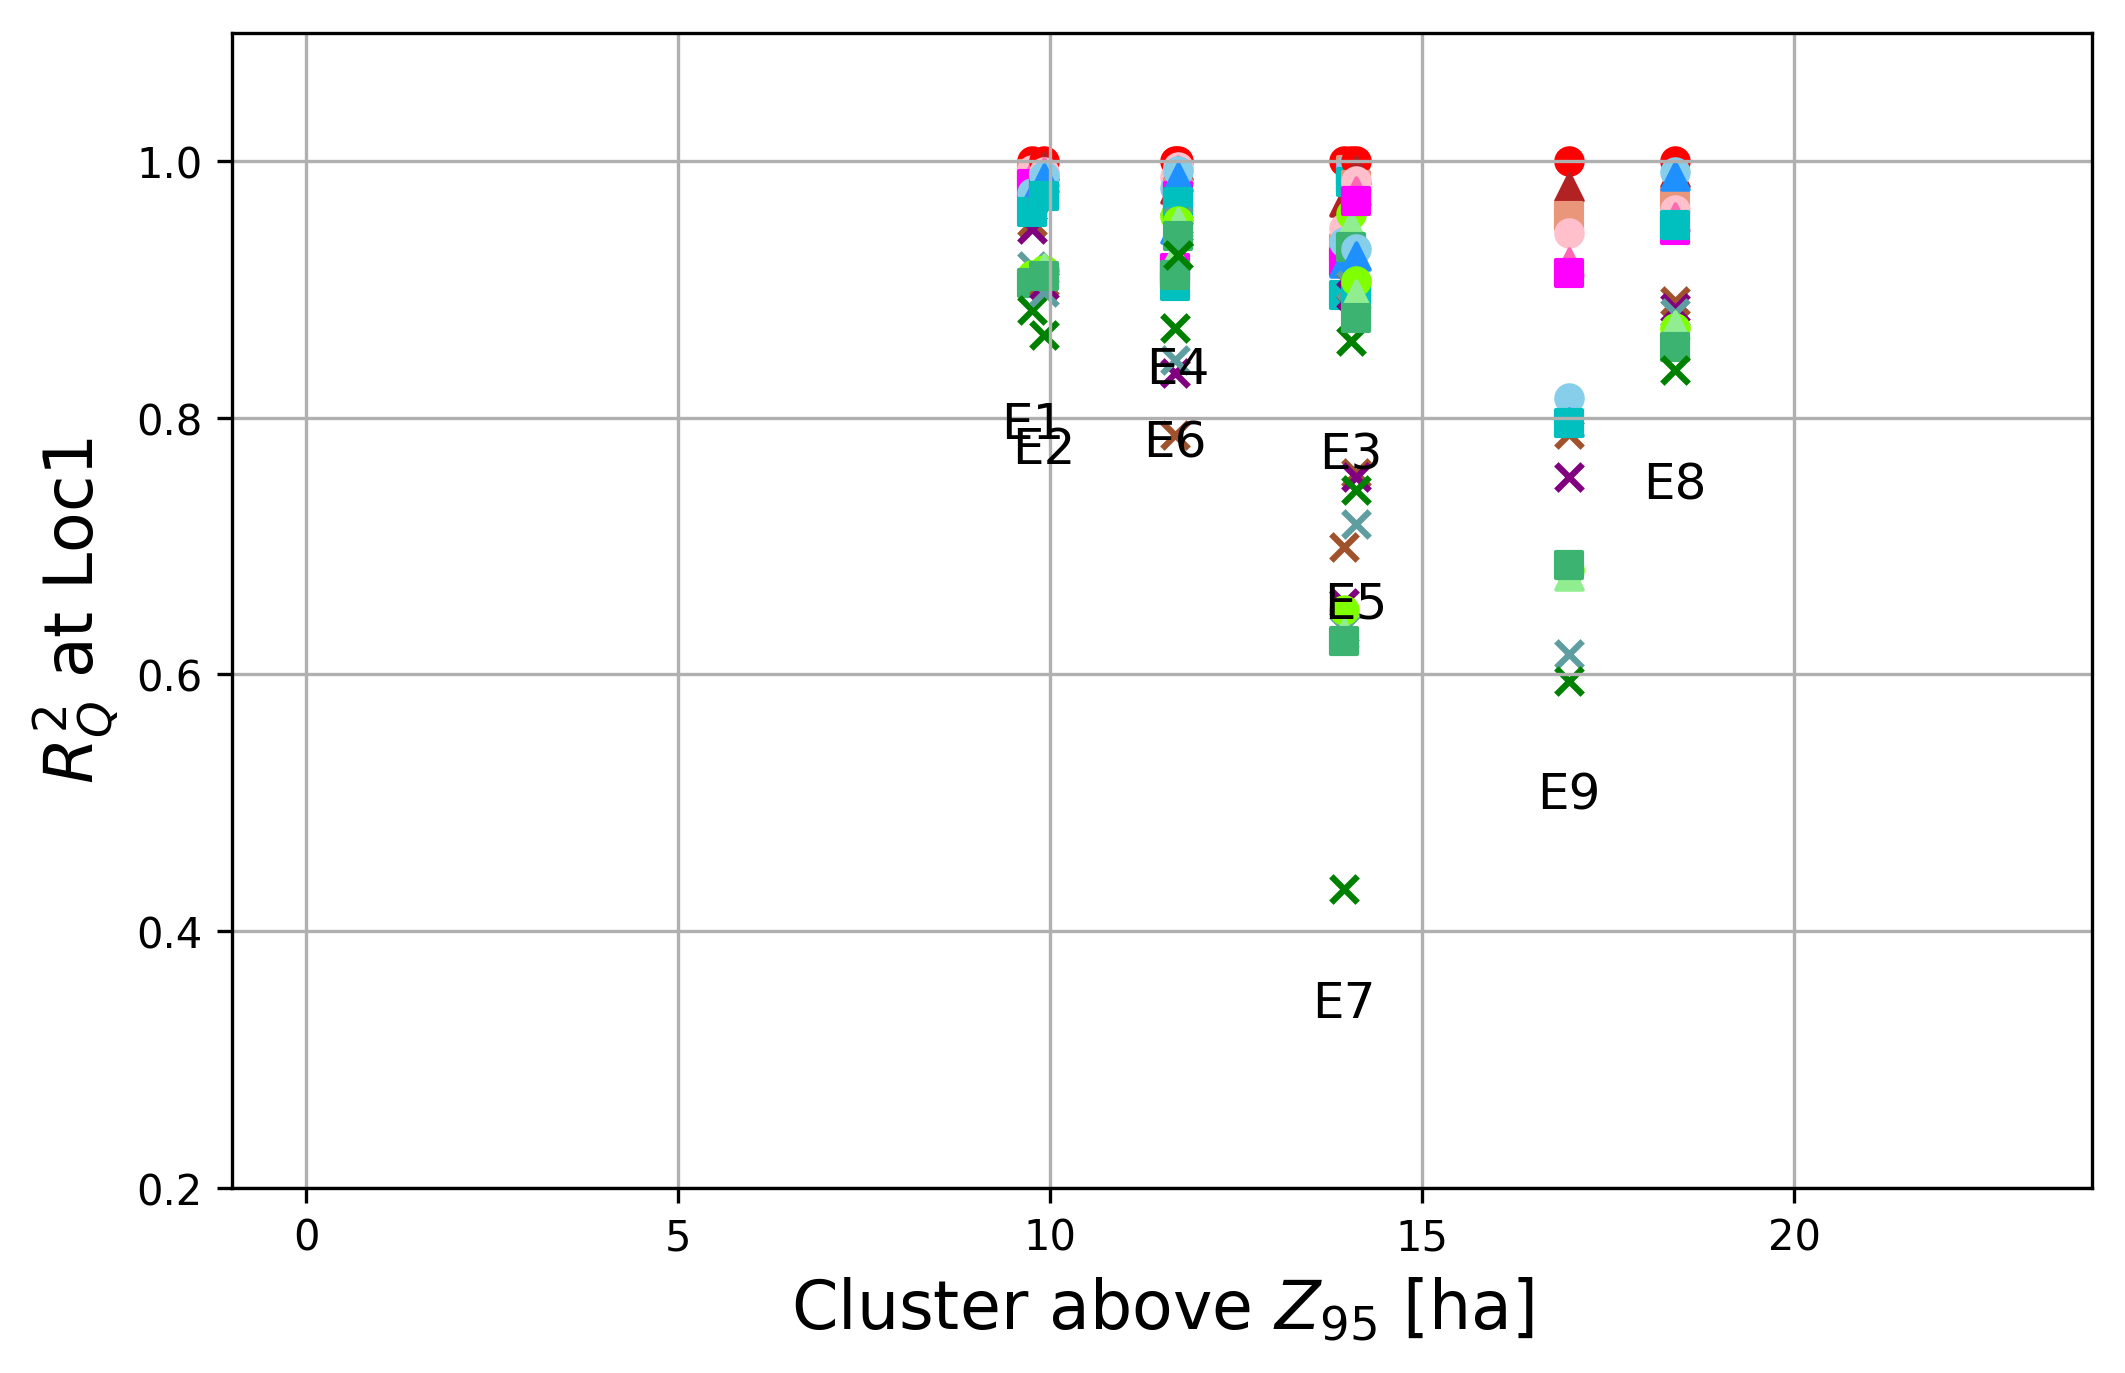

Supplement: Supplementary file 1 [file hess-22-2425-2018-supplement.zip › Order/R2_S22_loc1.png]

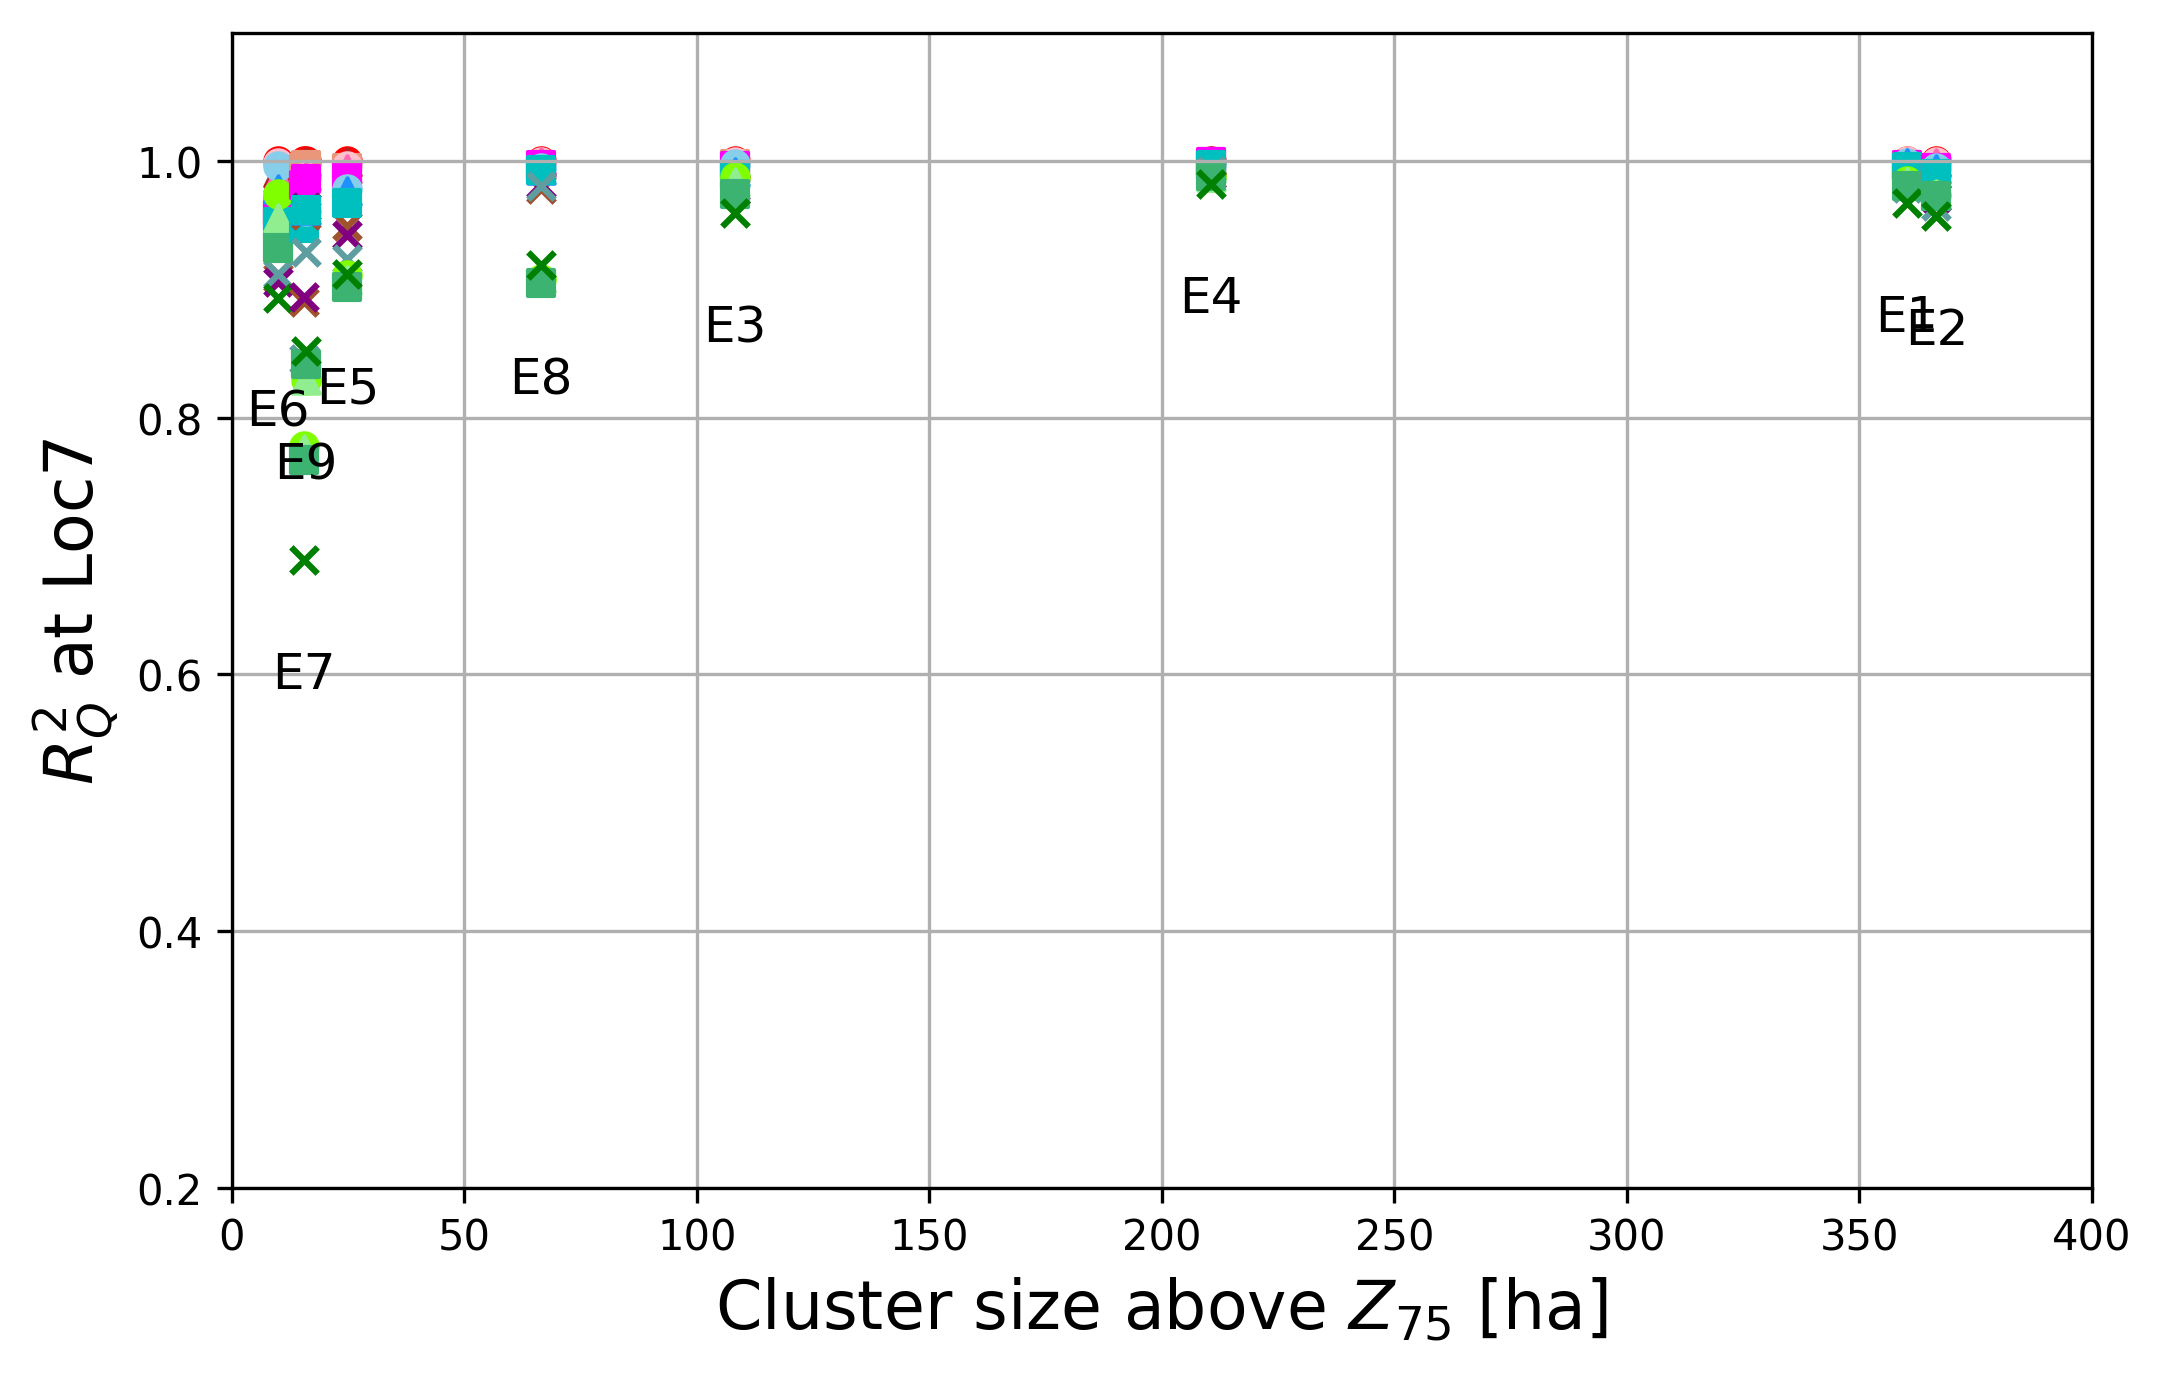

Supplement: Supplementary file 1 [file hess-22-2425-2018-supplement.zip › Order/R2_S7_loc7.png]

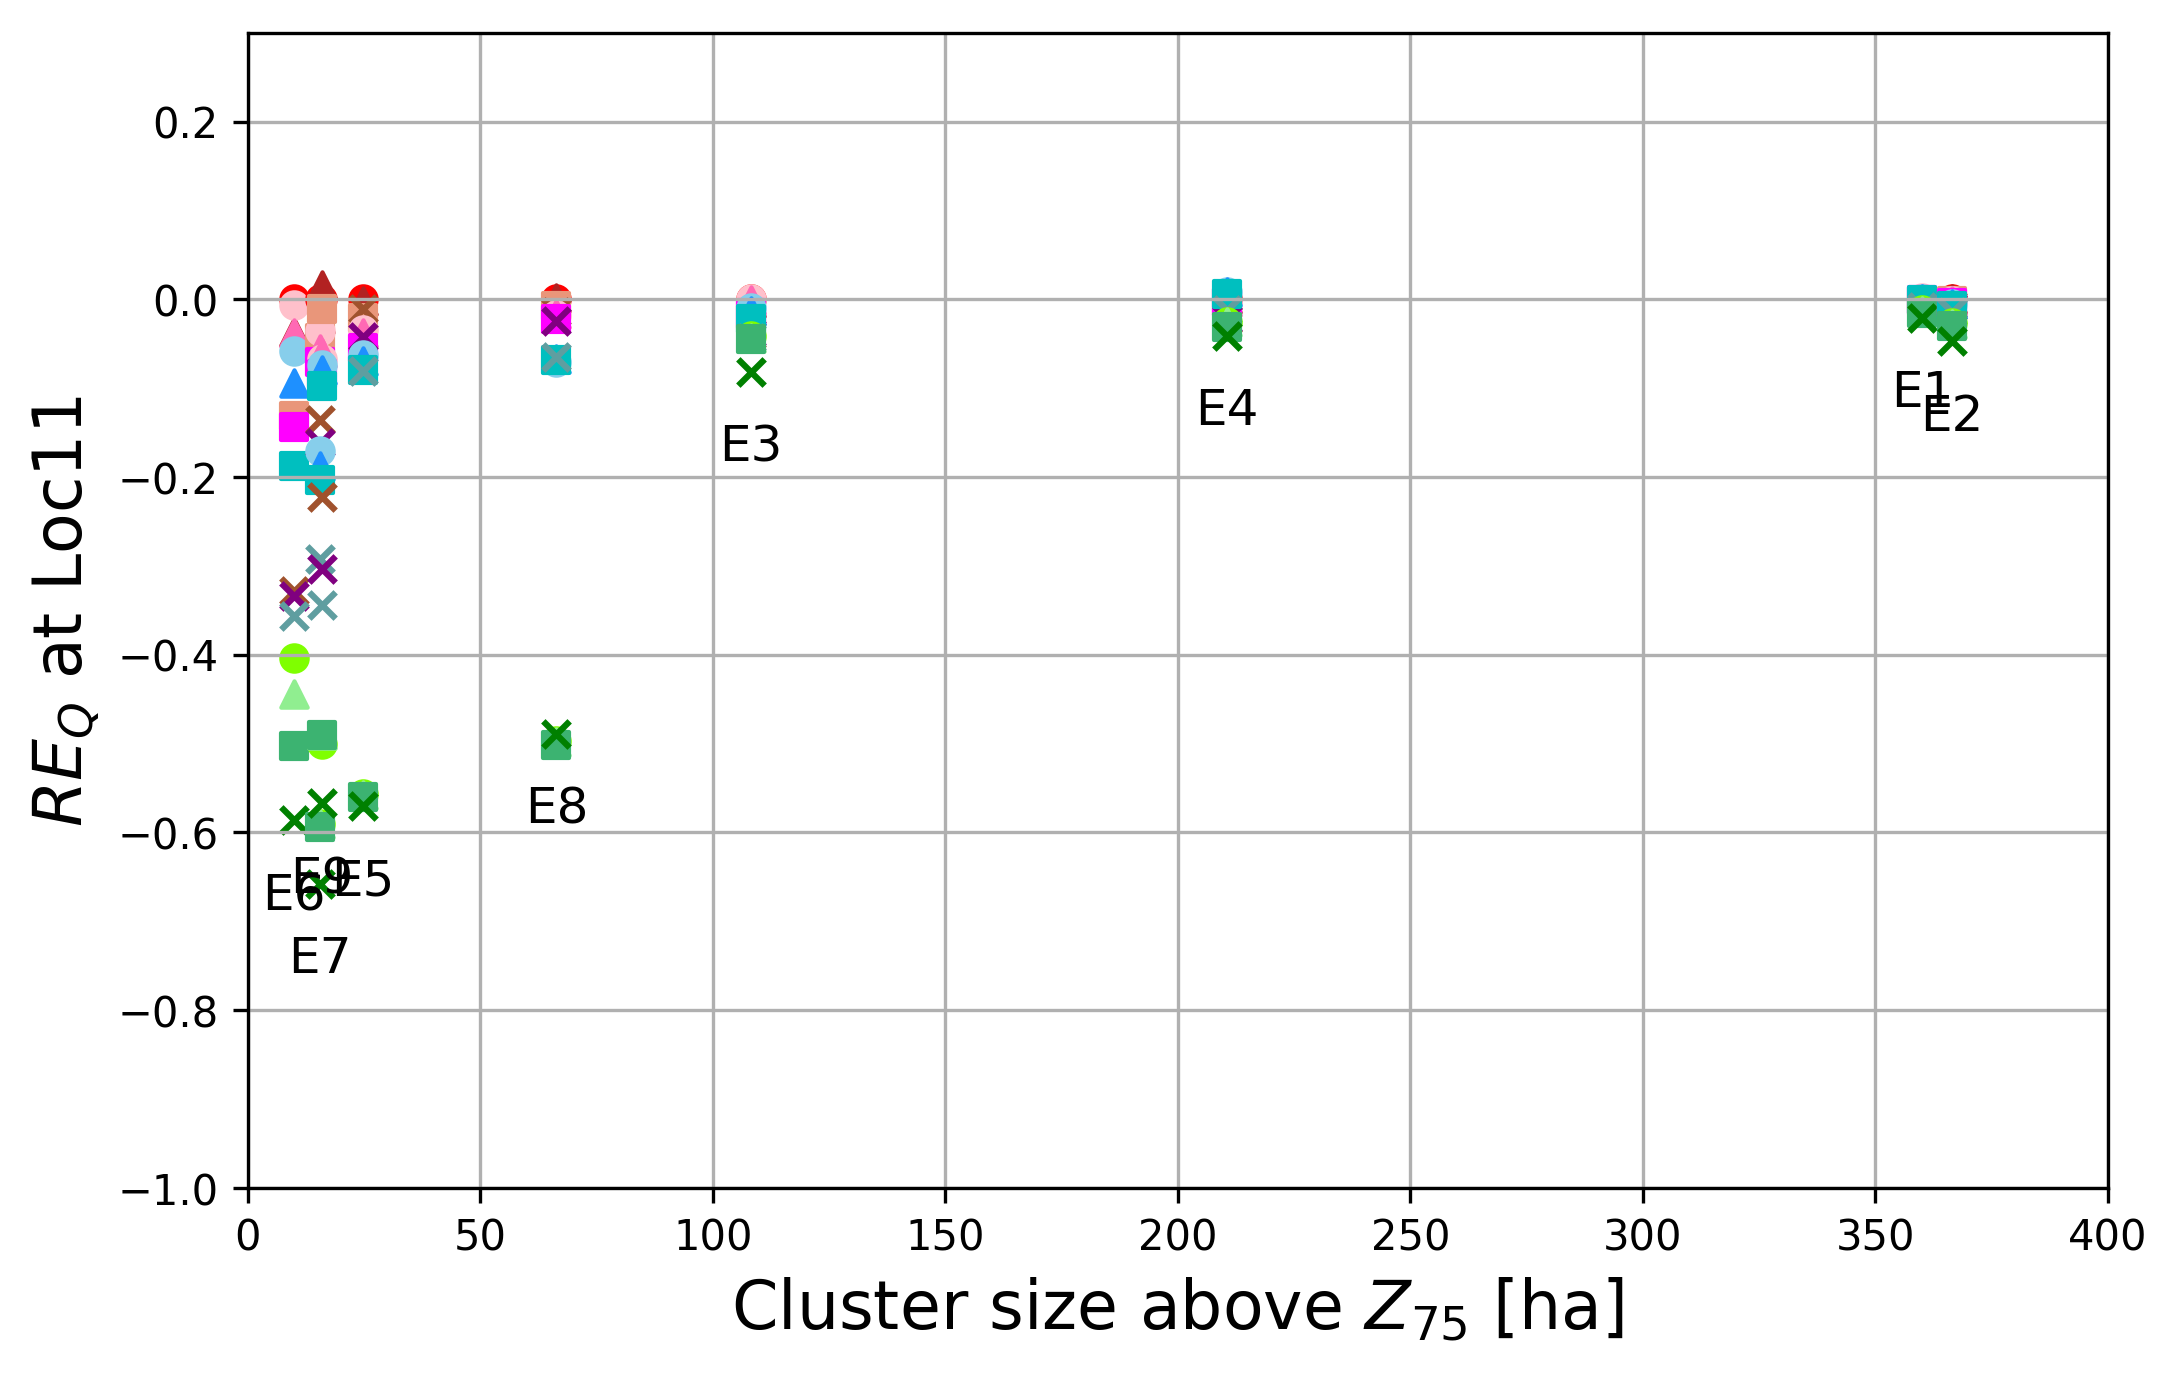

Supplement: Supplementary file 1 [file hess-22-2425-2018-supplement.zip › Order/RE_S7_loc11.png]

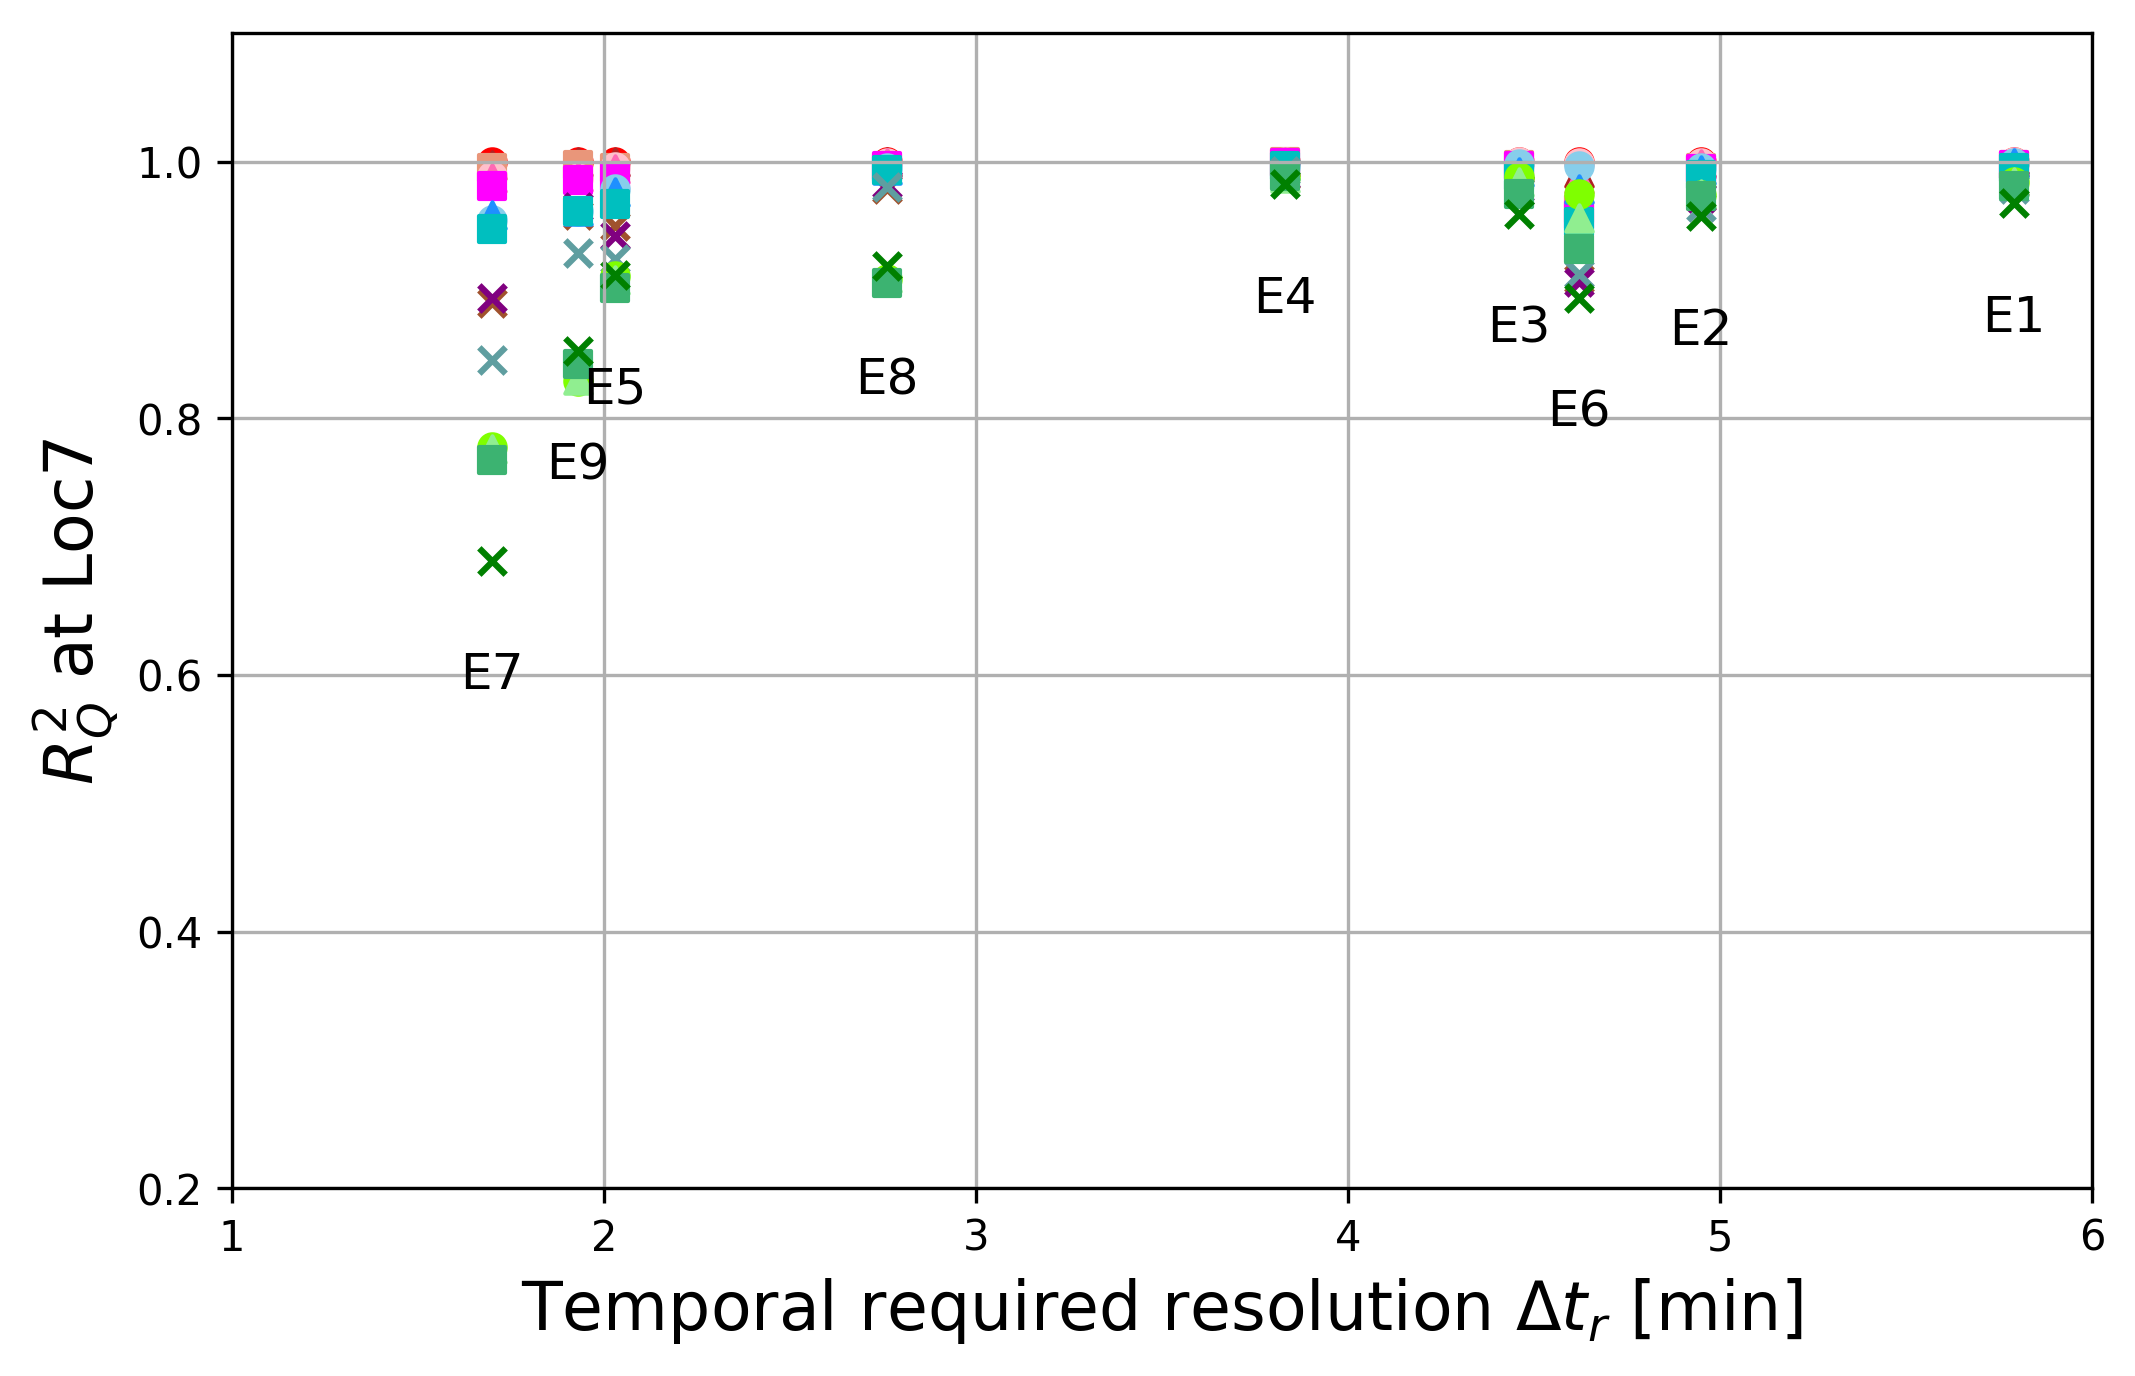

Supplement: Supplementary file 1 [file hess-22-2425-2018-supplement.zip › Order/R2_OchoaT_loc7.png]

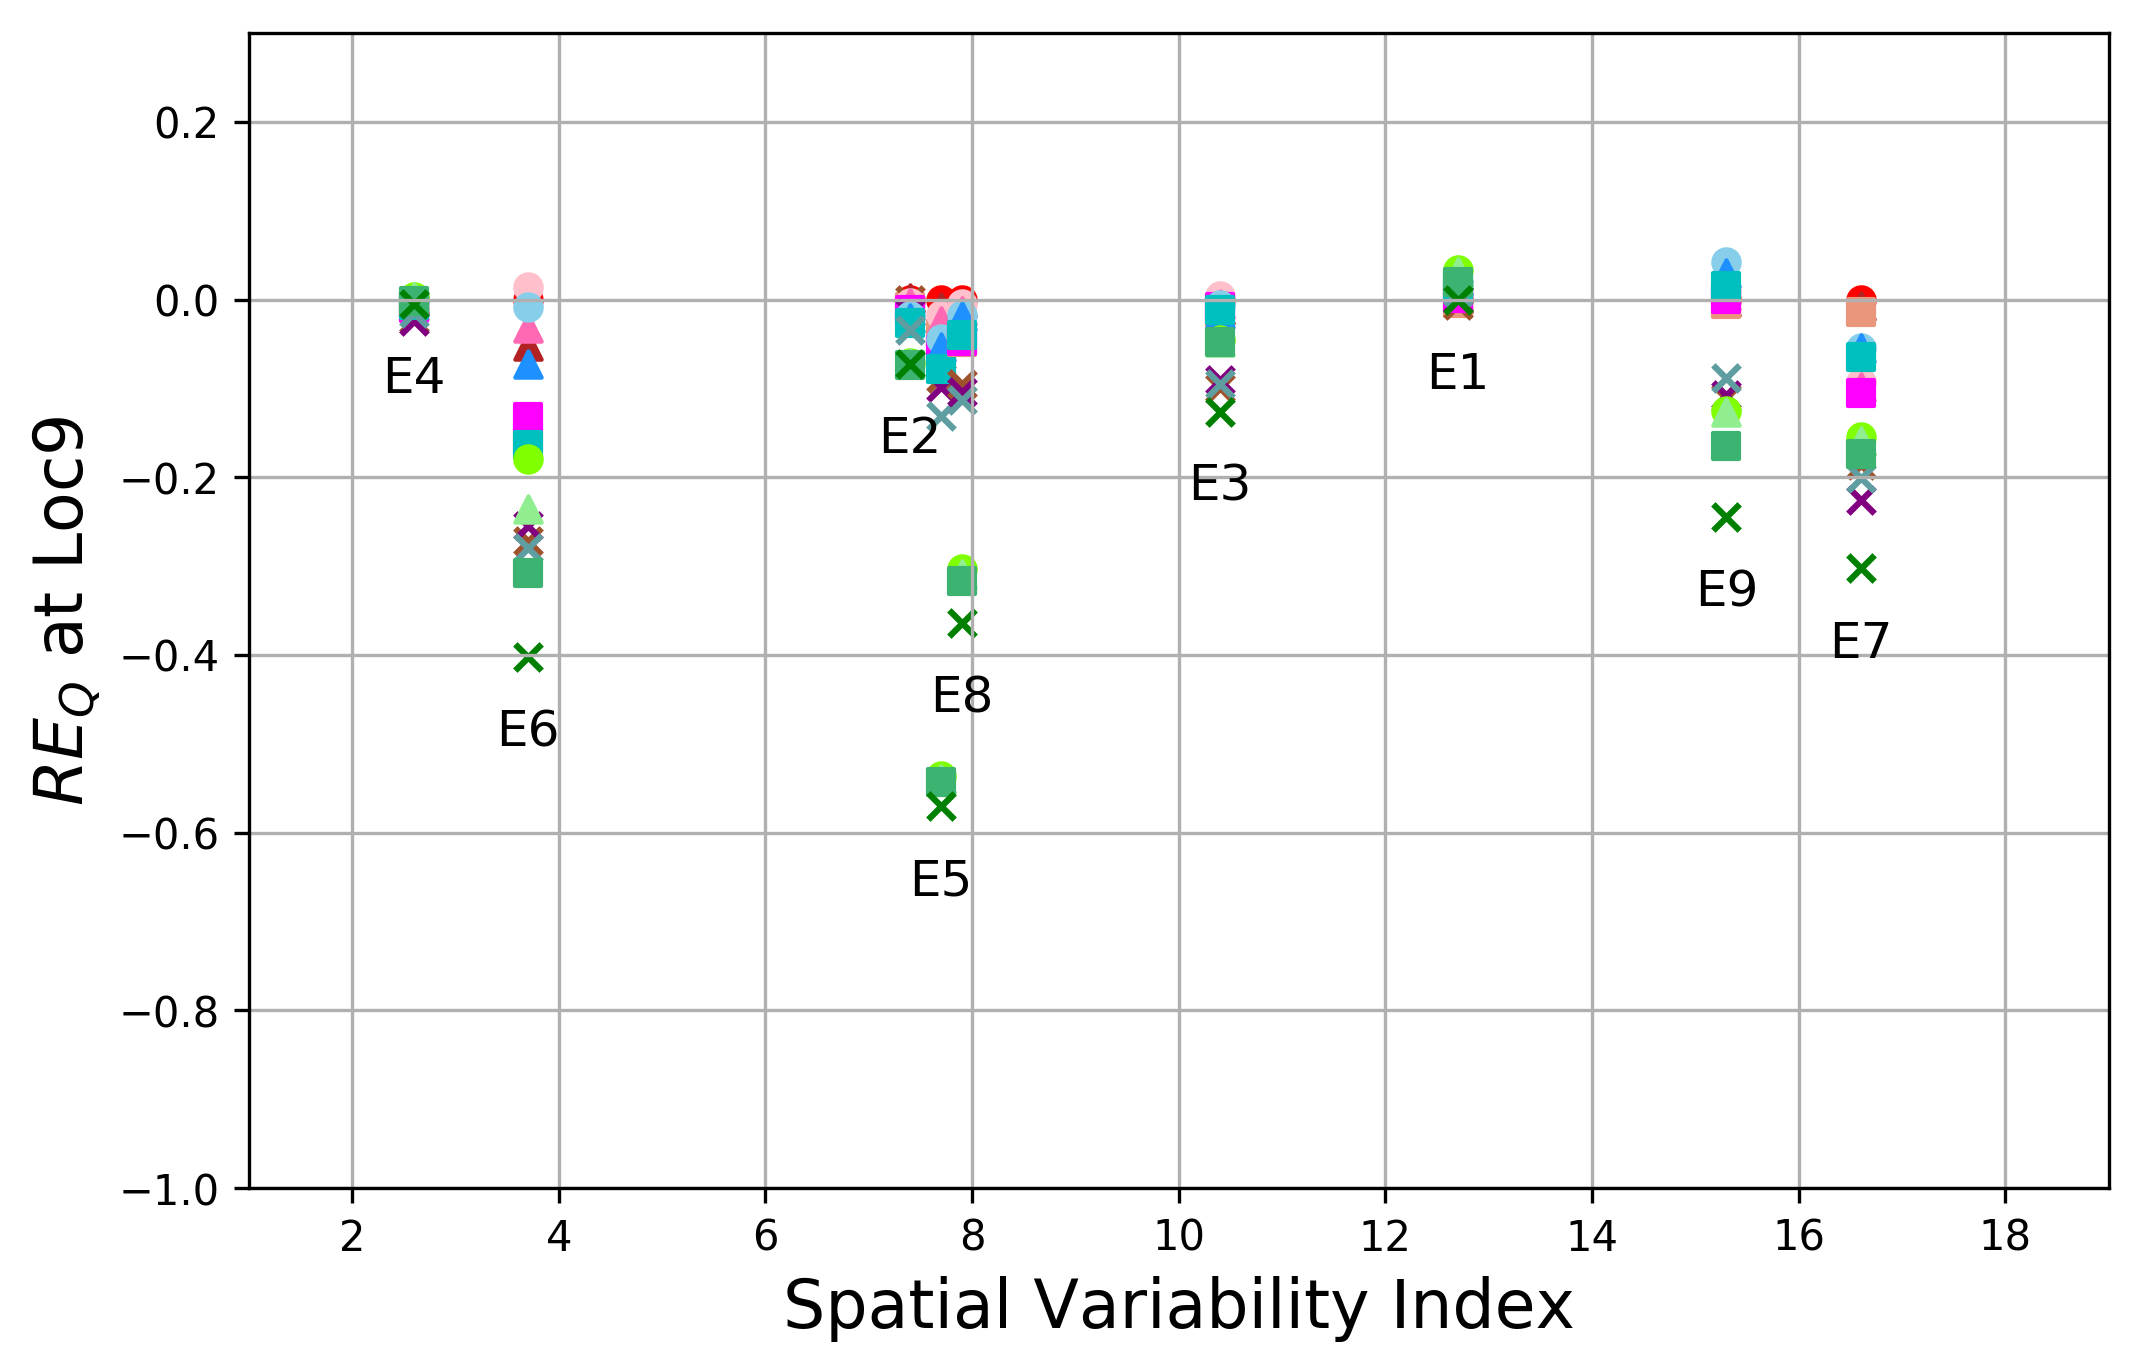

Supplement: Supplementary file 1 [file hess-22-2425-2018-supplement.zip › Order/RE_SVI_loc9.png]

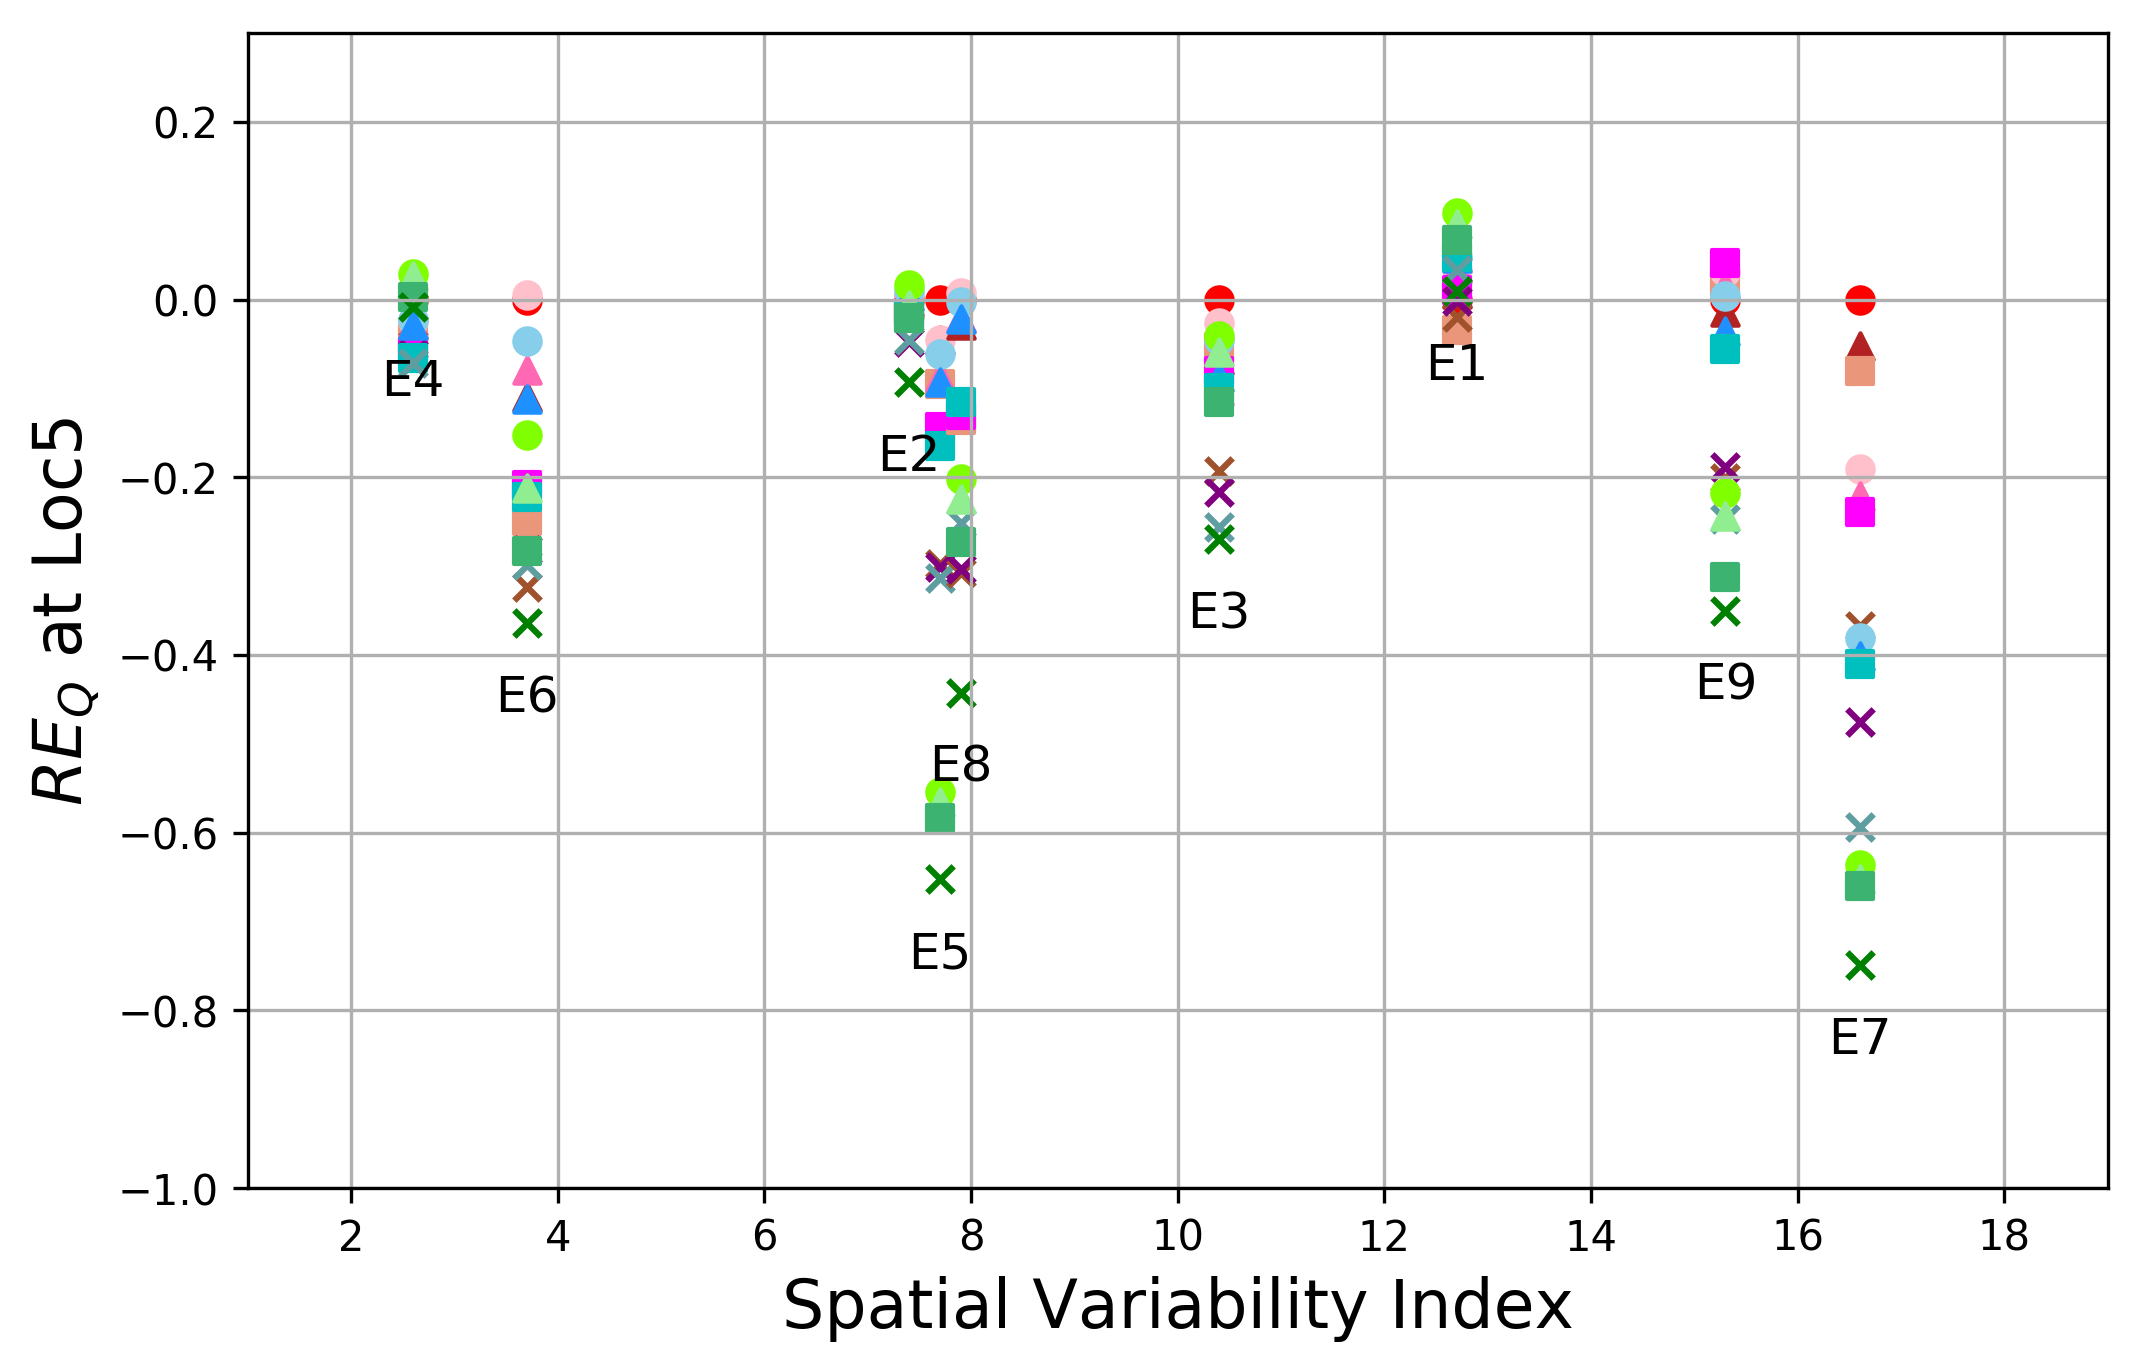

Supplement: Supplementary file 1 [file hess-22-2425-2018-supplement.zip › Order/RE_SVI_loc5.png]

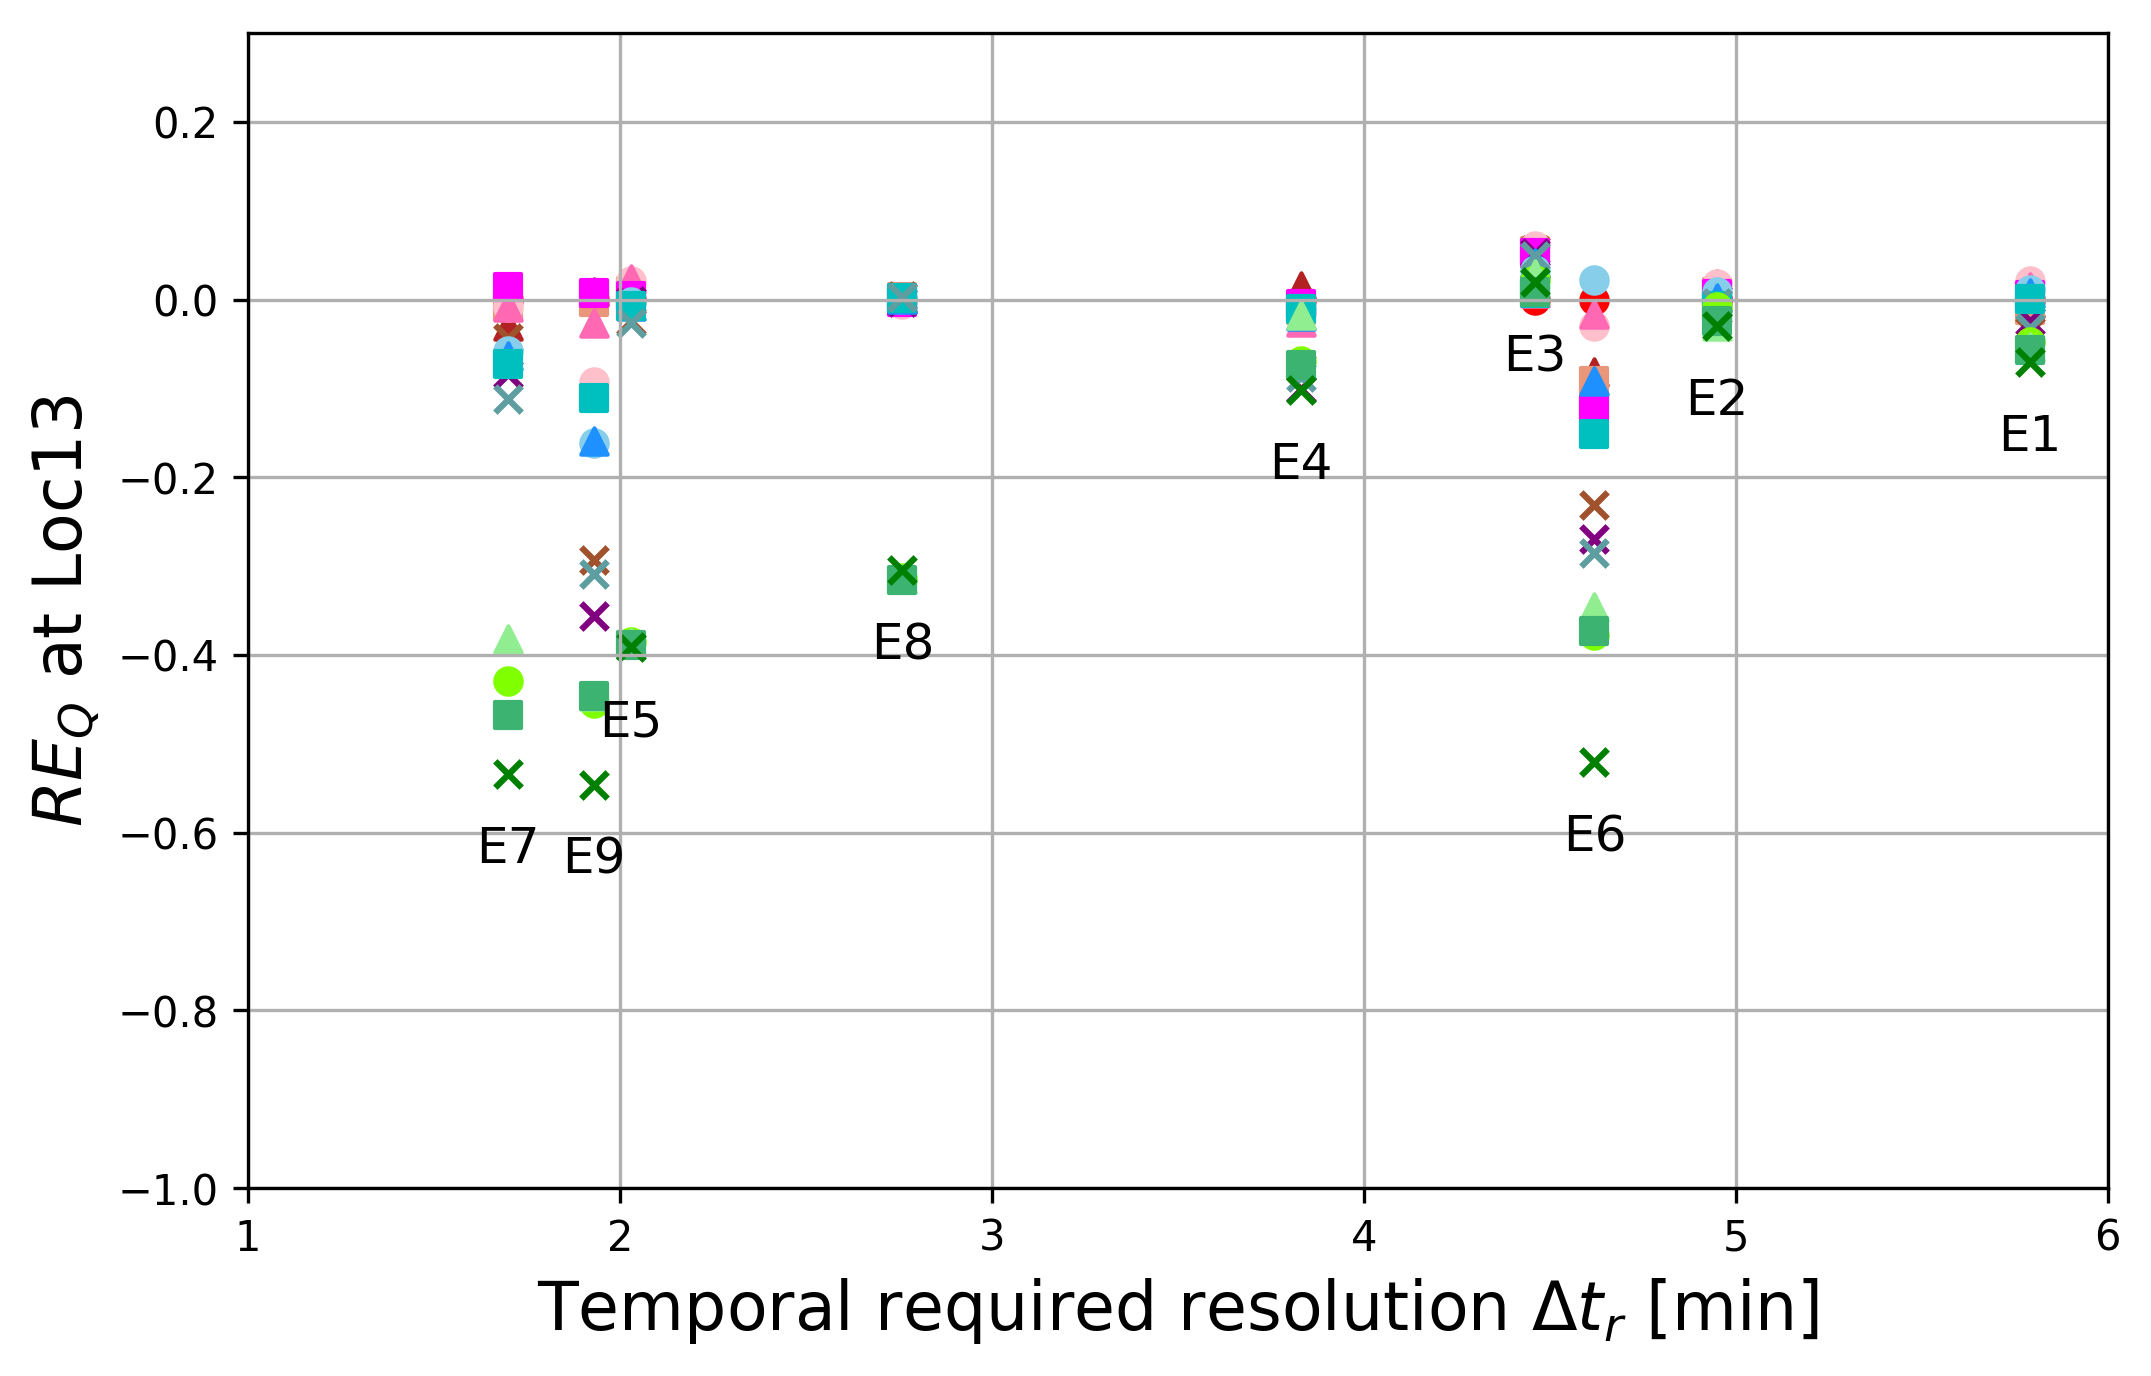

Supplement: Supplementary file 1 [file hess-22-2425-2018-supplement.zip › Order/RE_OchoaT_loc13.png]

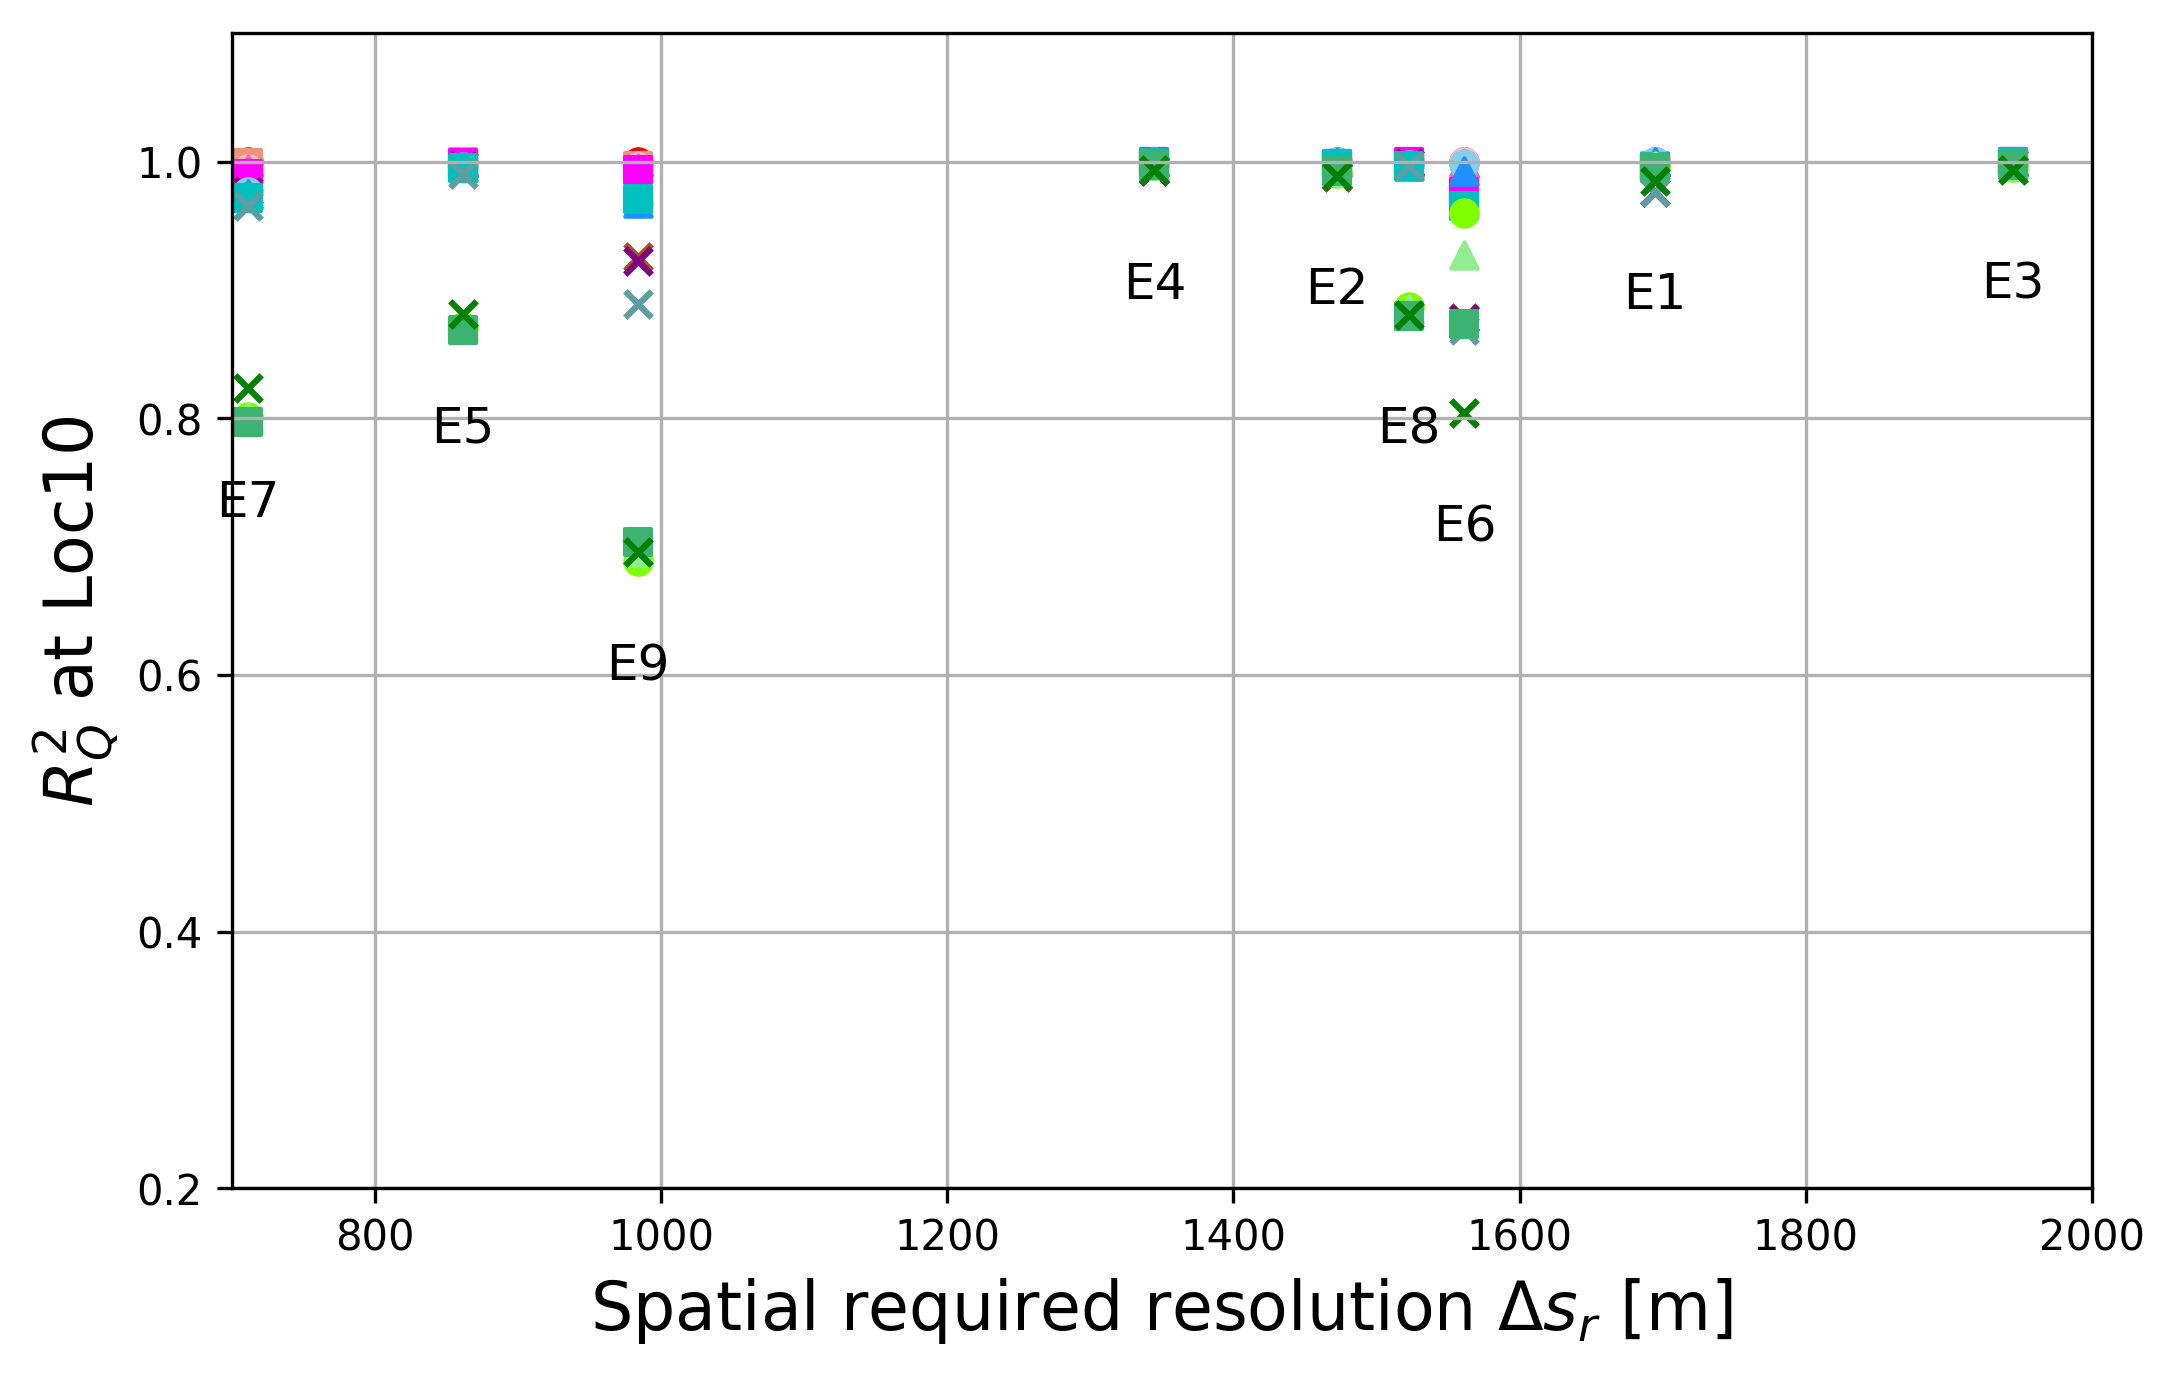

Supplement: Supplementary file 1 [file hess-22-2425-2018-supplement.zip › Order/R2_OchoaS_loc10.png]

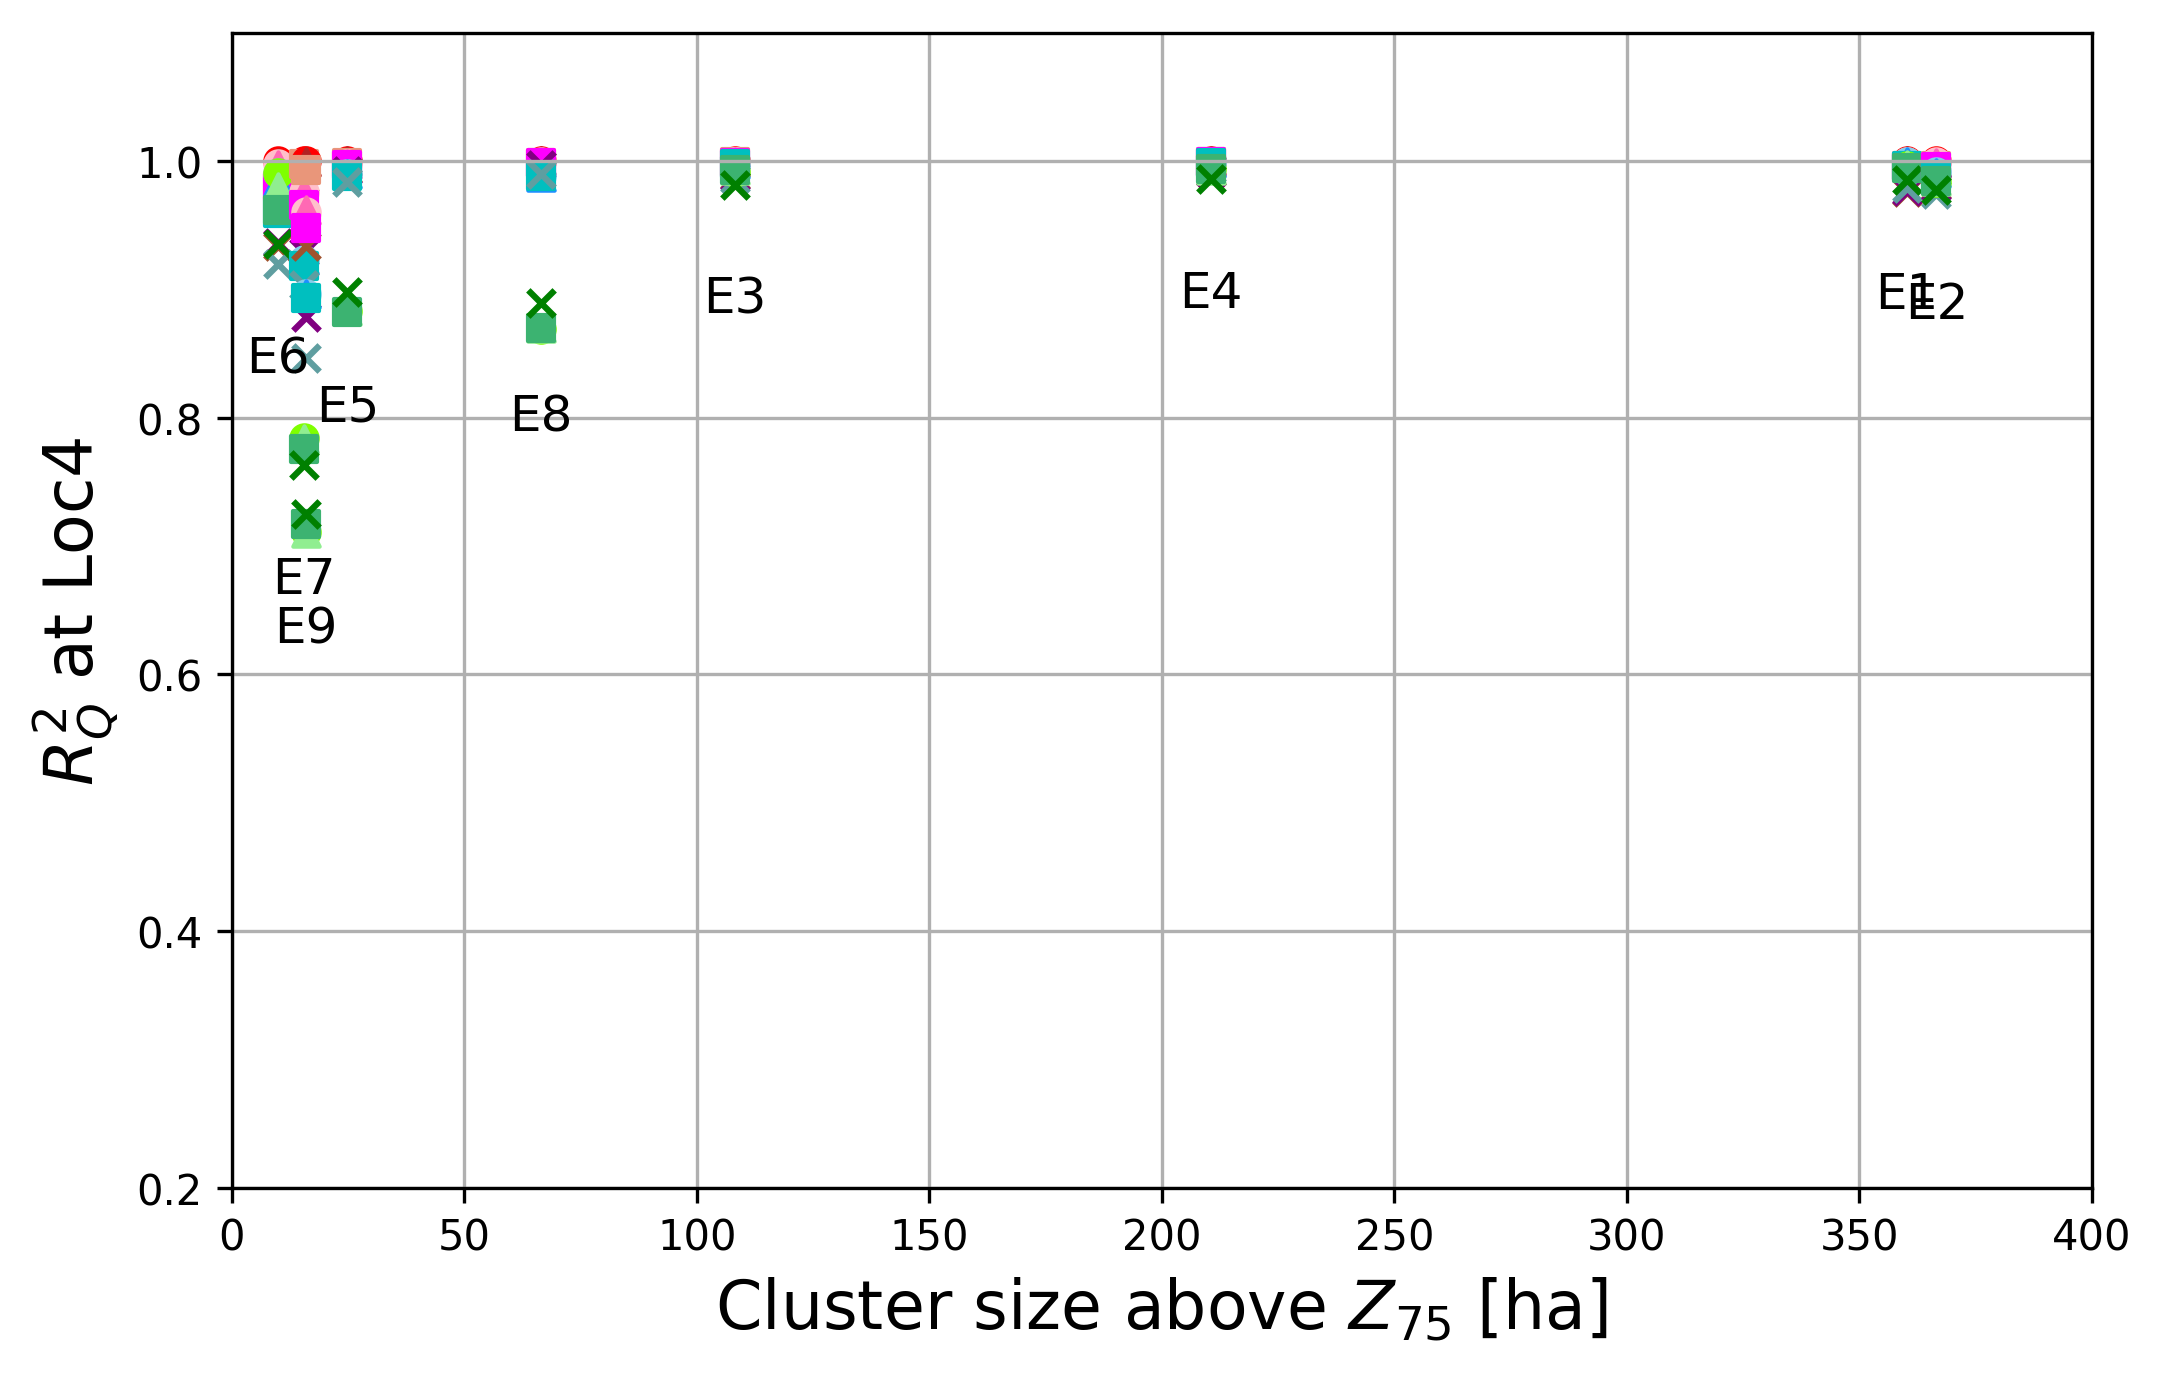

Supplement: Supplementary file 1 [file hess-22-2425-2018-supplement.zip › Order/R2_S7_loc4.png]

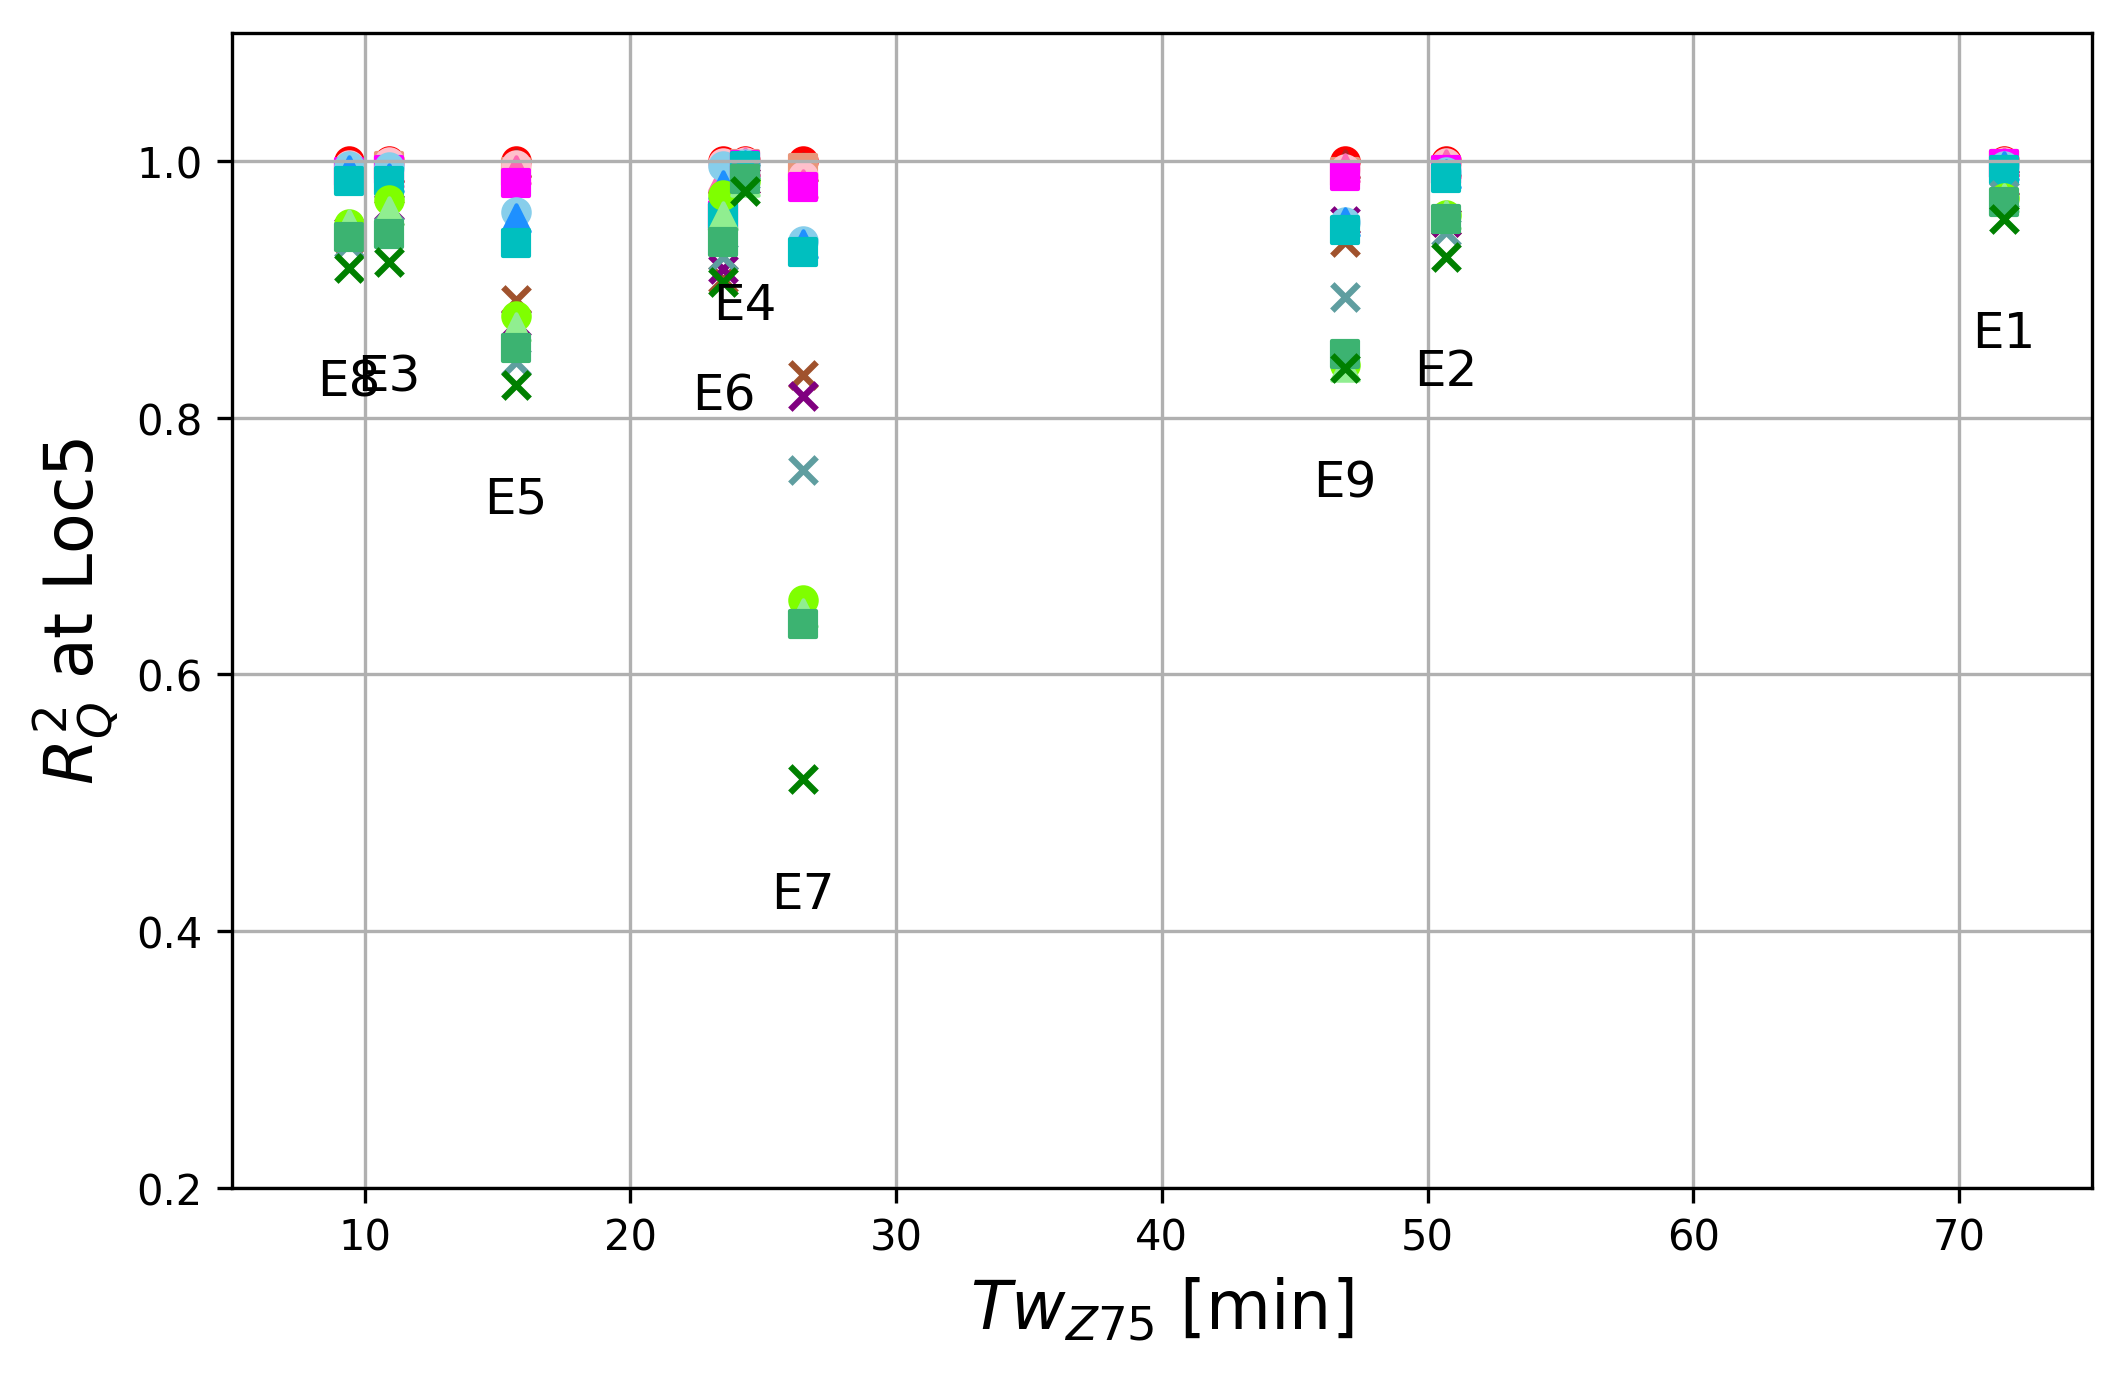

Supplement: Supplementary file 1 [file hess-22-2425-2018-supplement.zip › Order/R2_T7plus_loc5.png]

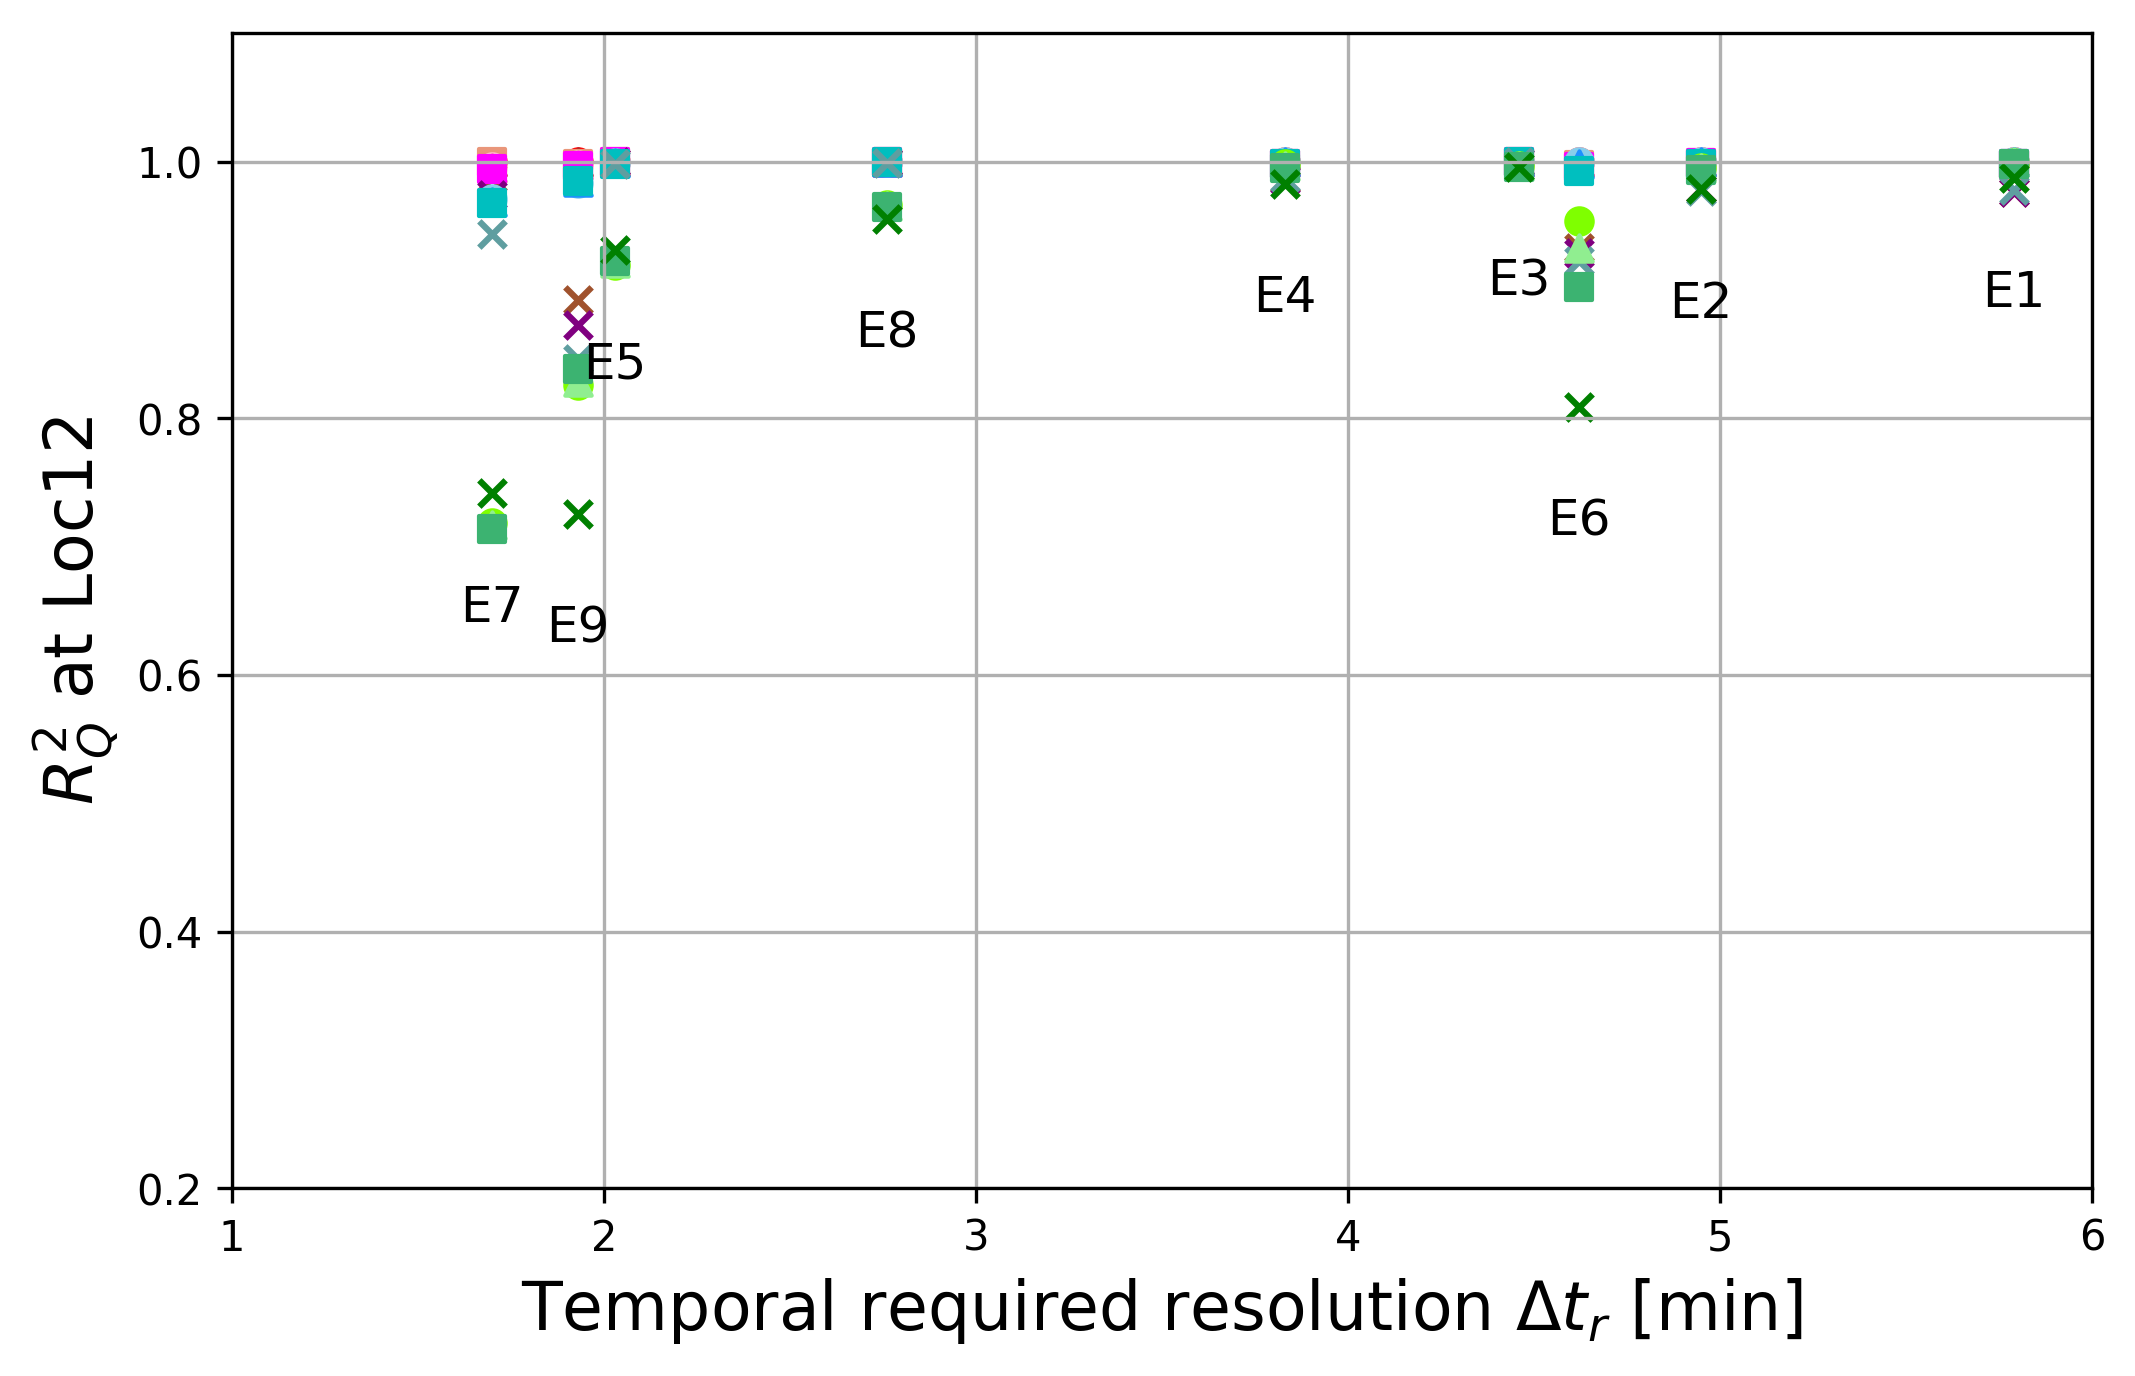

Supplement: Supplementary file 1 [file hess-22-2425-2018-supplement.zip › Order/R2_OchoaT_loc12.png]

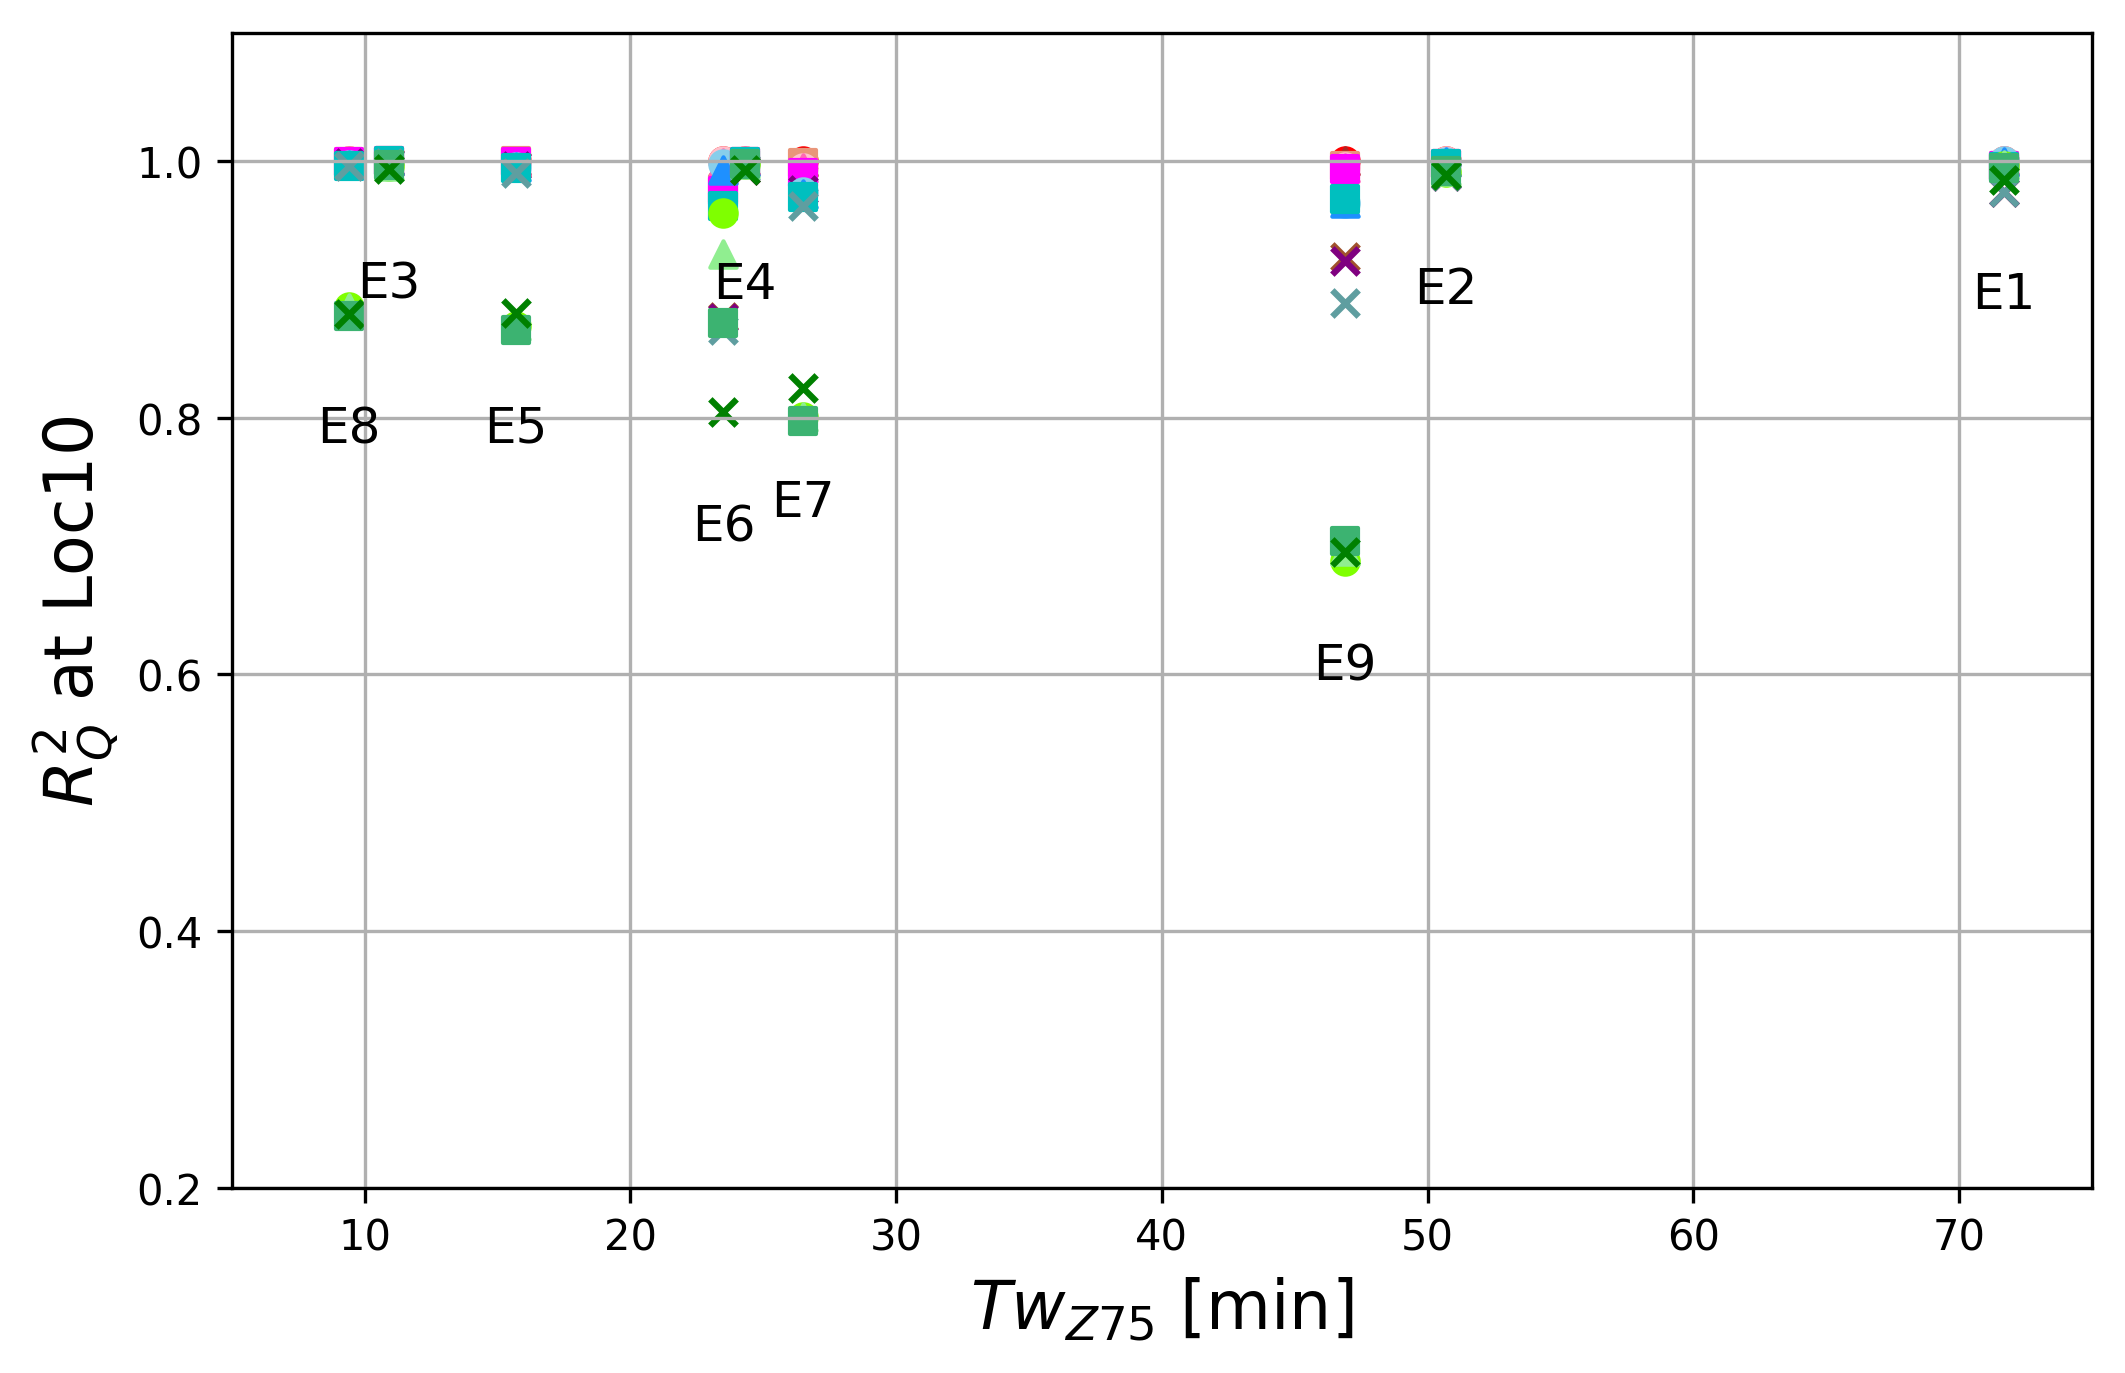

Supplement: Supplementary file 1 [file hess-22-2425-2018-supplement.zip › Order/R2_T7plus_loc10.png]

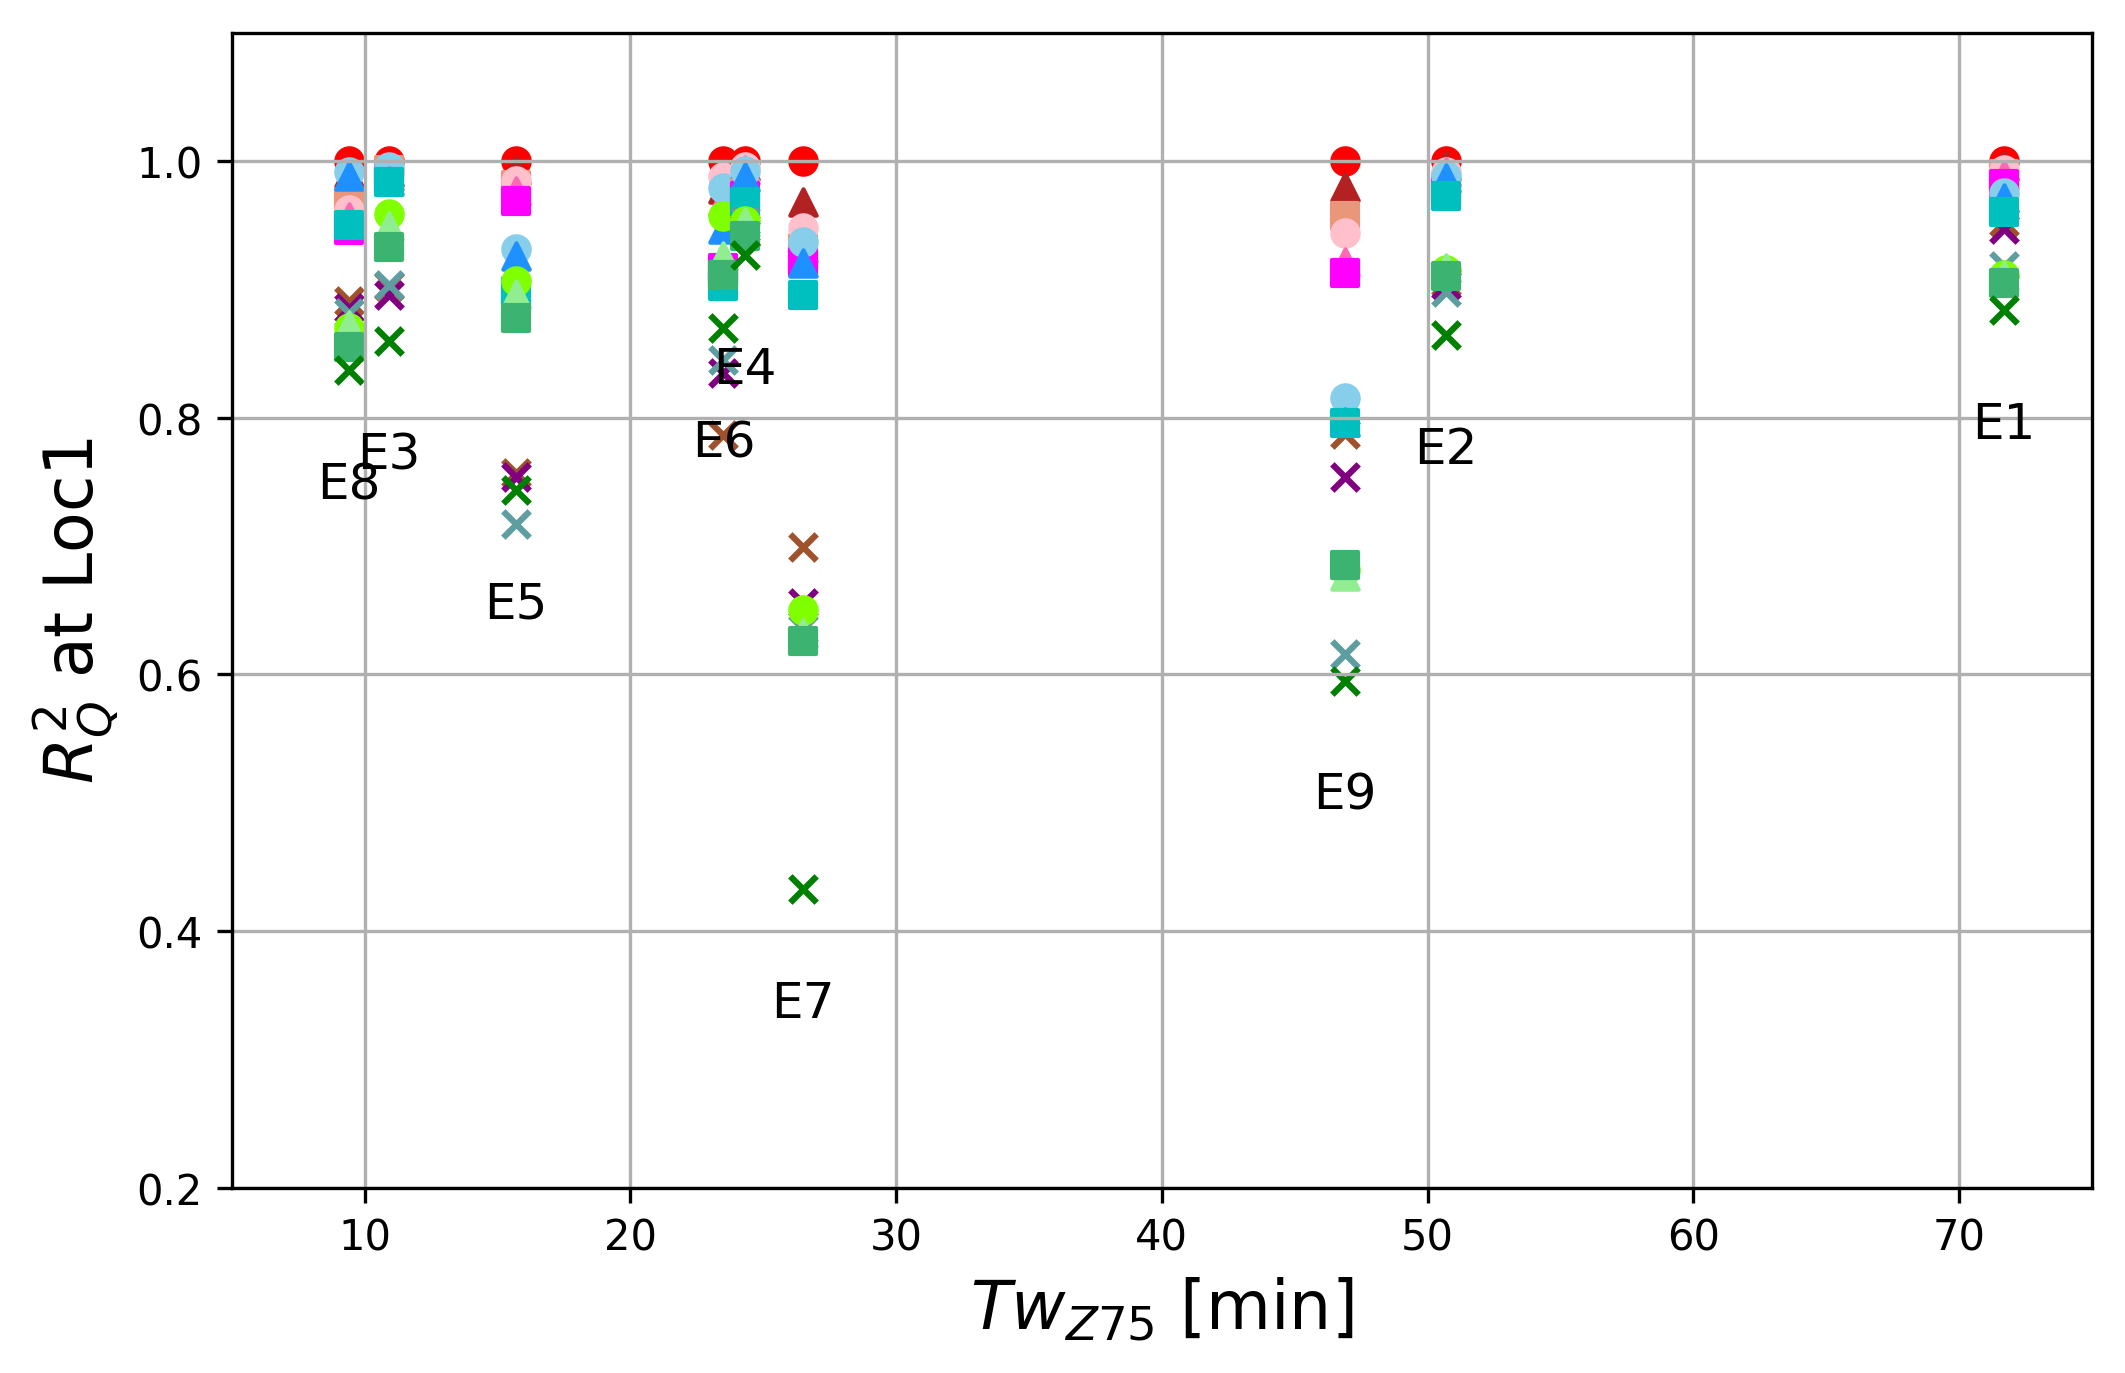

Supplement: Supplementary file 1 [file hess-22-2425-2018-supplement.zip › Order/R2_T7plus_loc1.png]

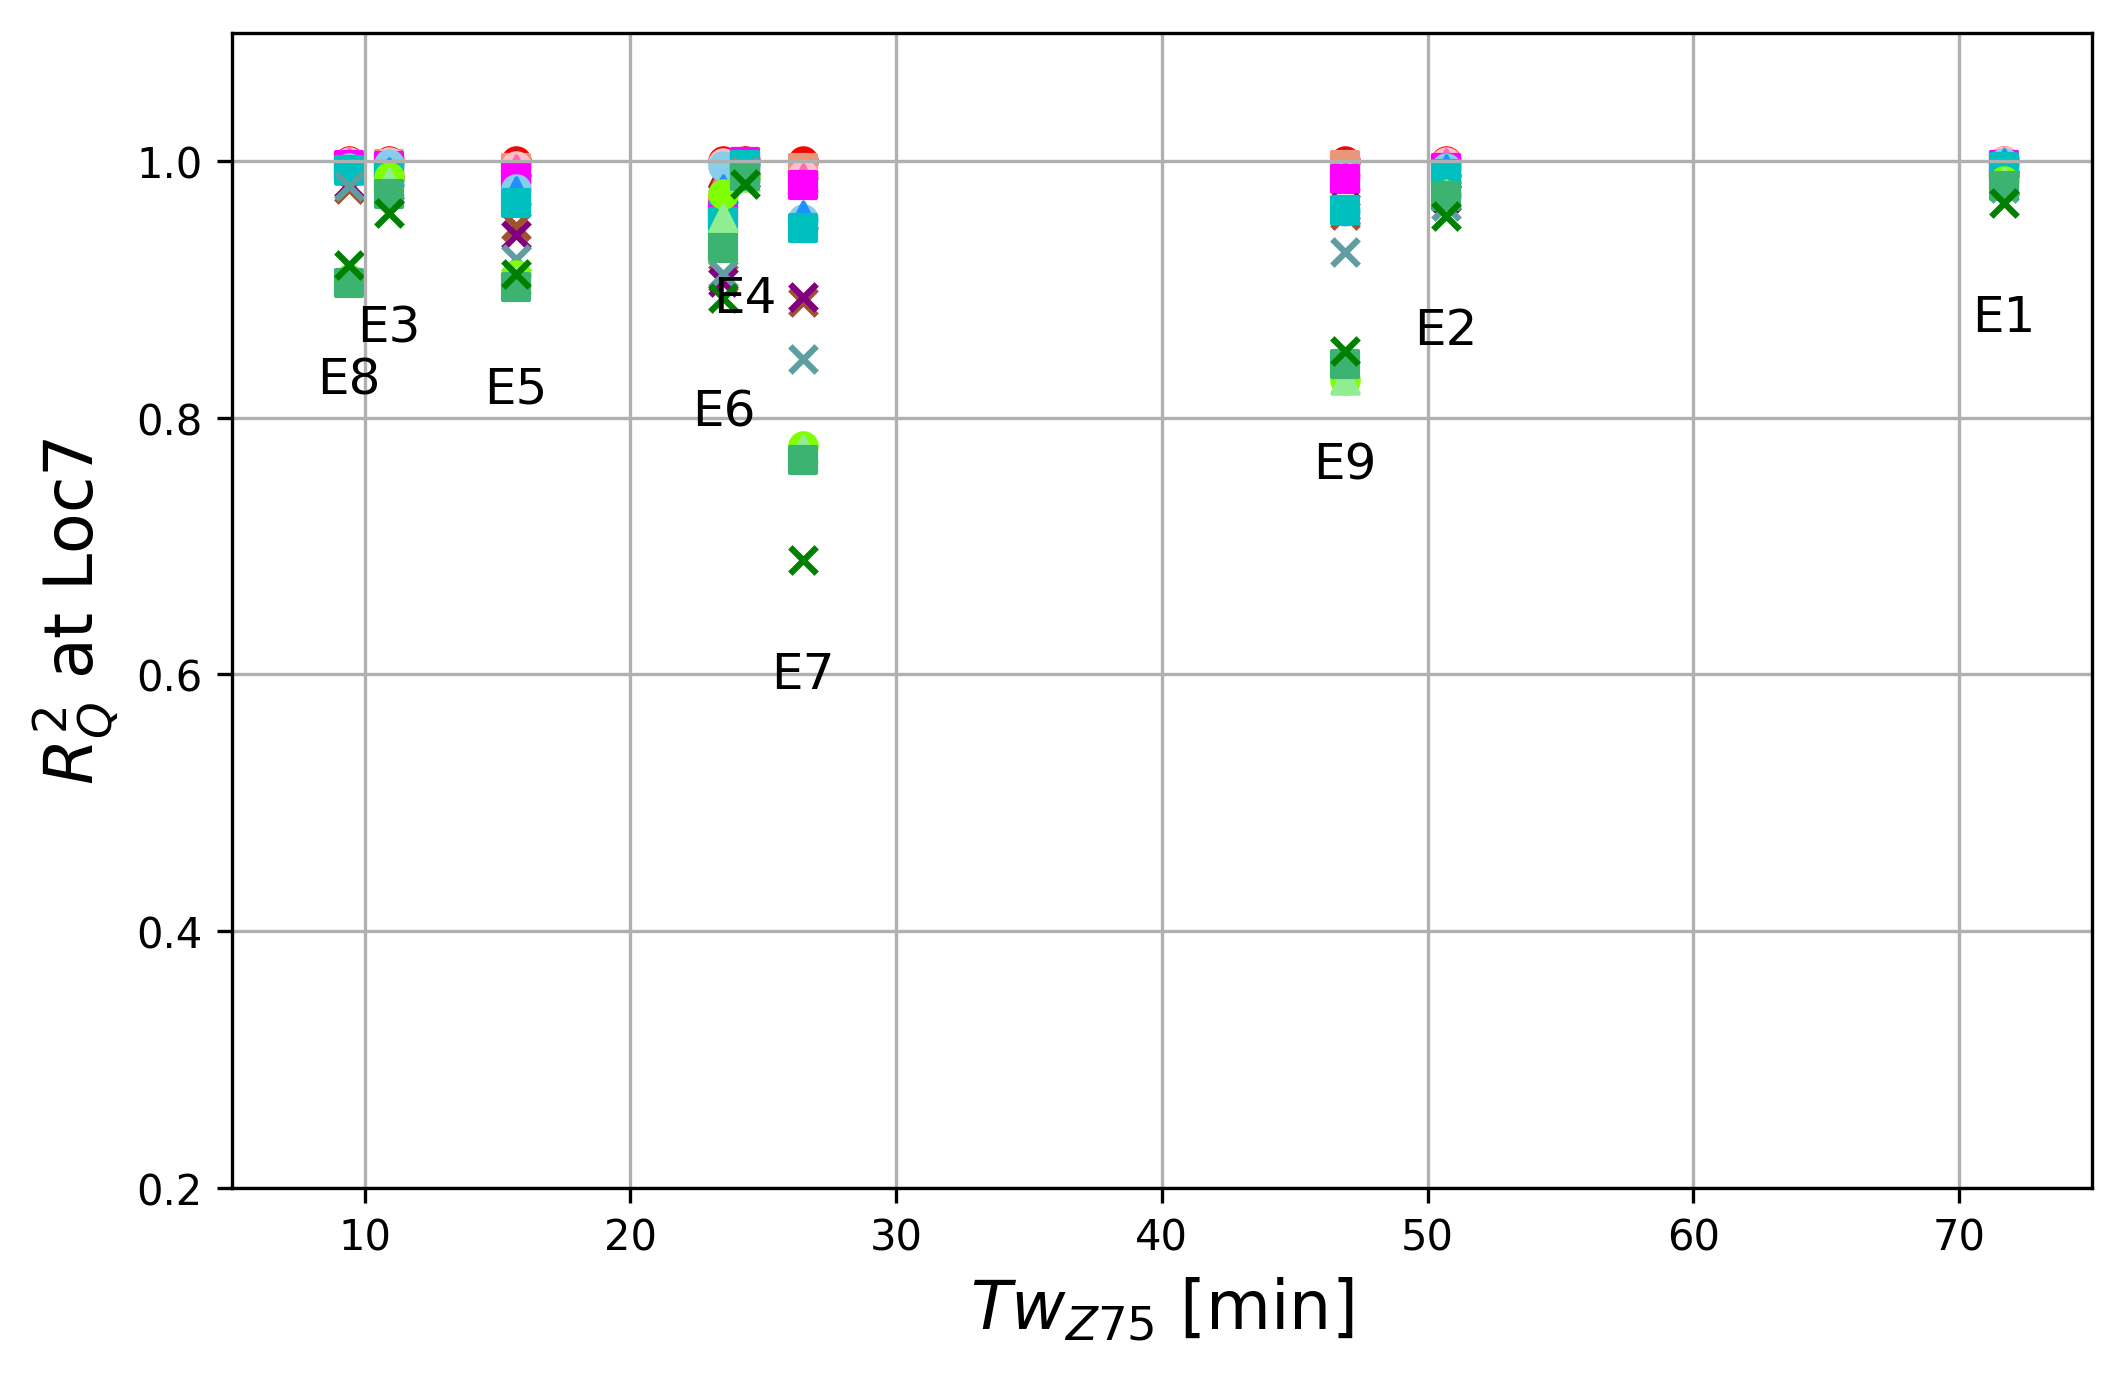

Supplement: Supplementary file 1 [file hess-22-2425-2018-supplement.zip › Order/R2_T7plus_loc7.png]

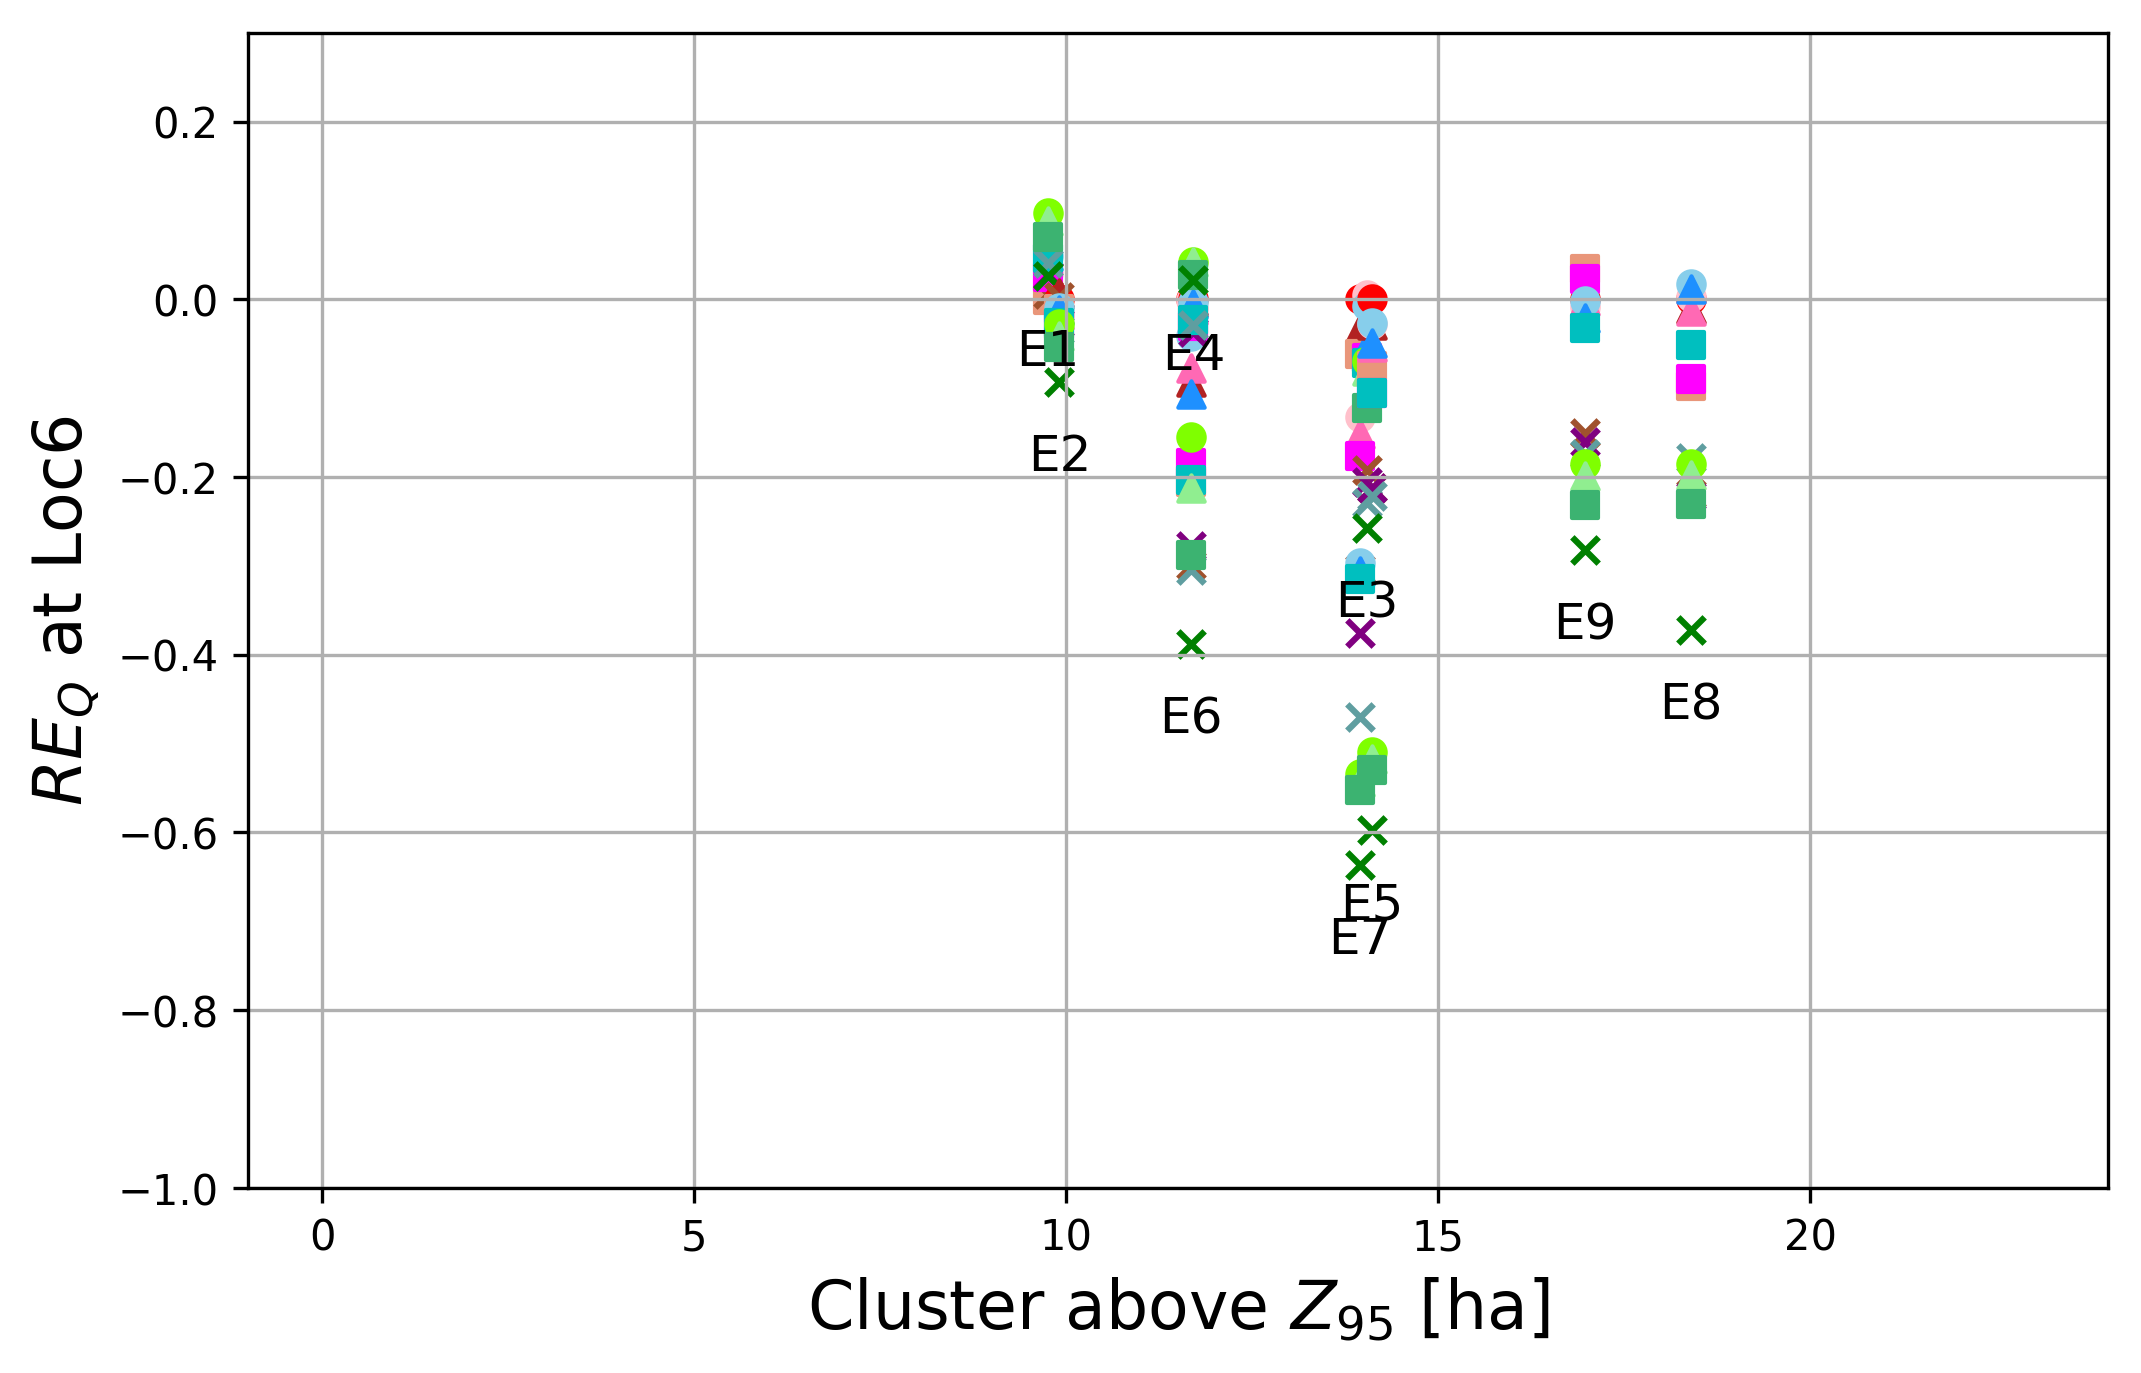

Supplement: Supplementary file 1 [file hess-22-2425-2018-supplement.zip › Order/RE_S22_loc6.png]

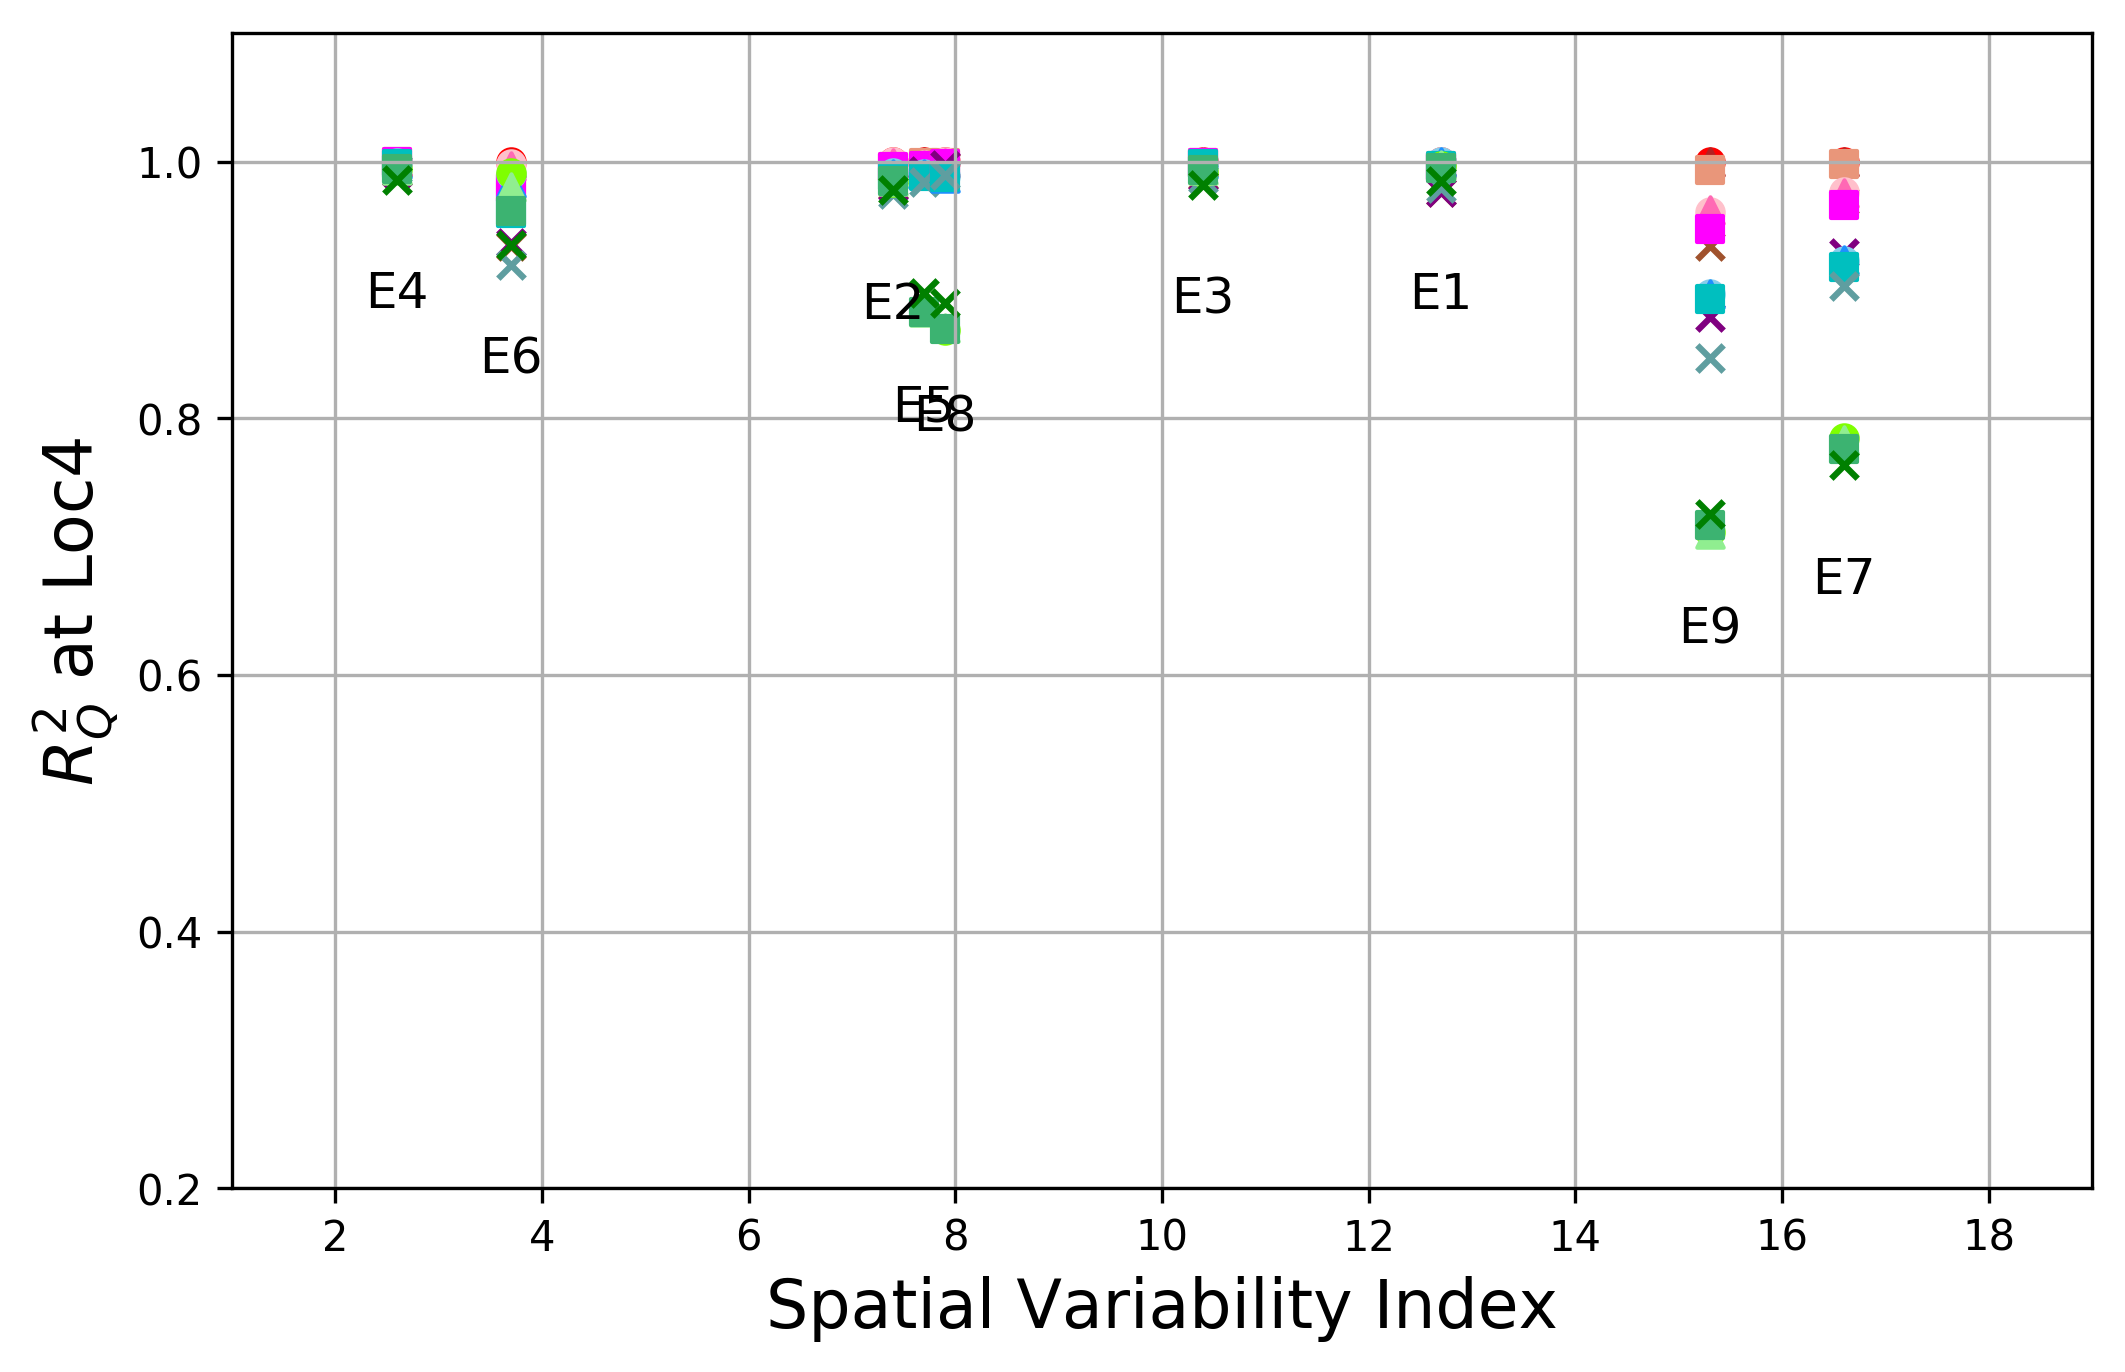

Supplement: Supplementary file 1 [file hess-22-2425-2018-supplement.zip › Order/R2_SVI_loc4.png]

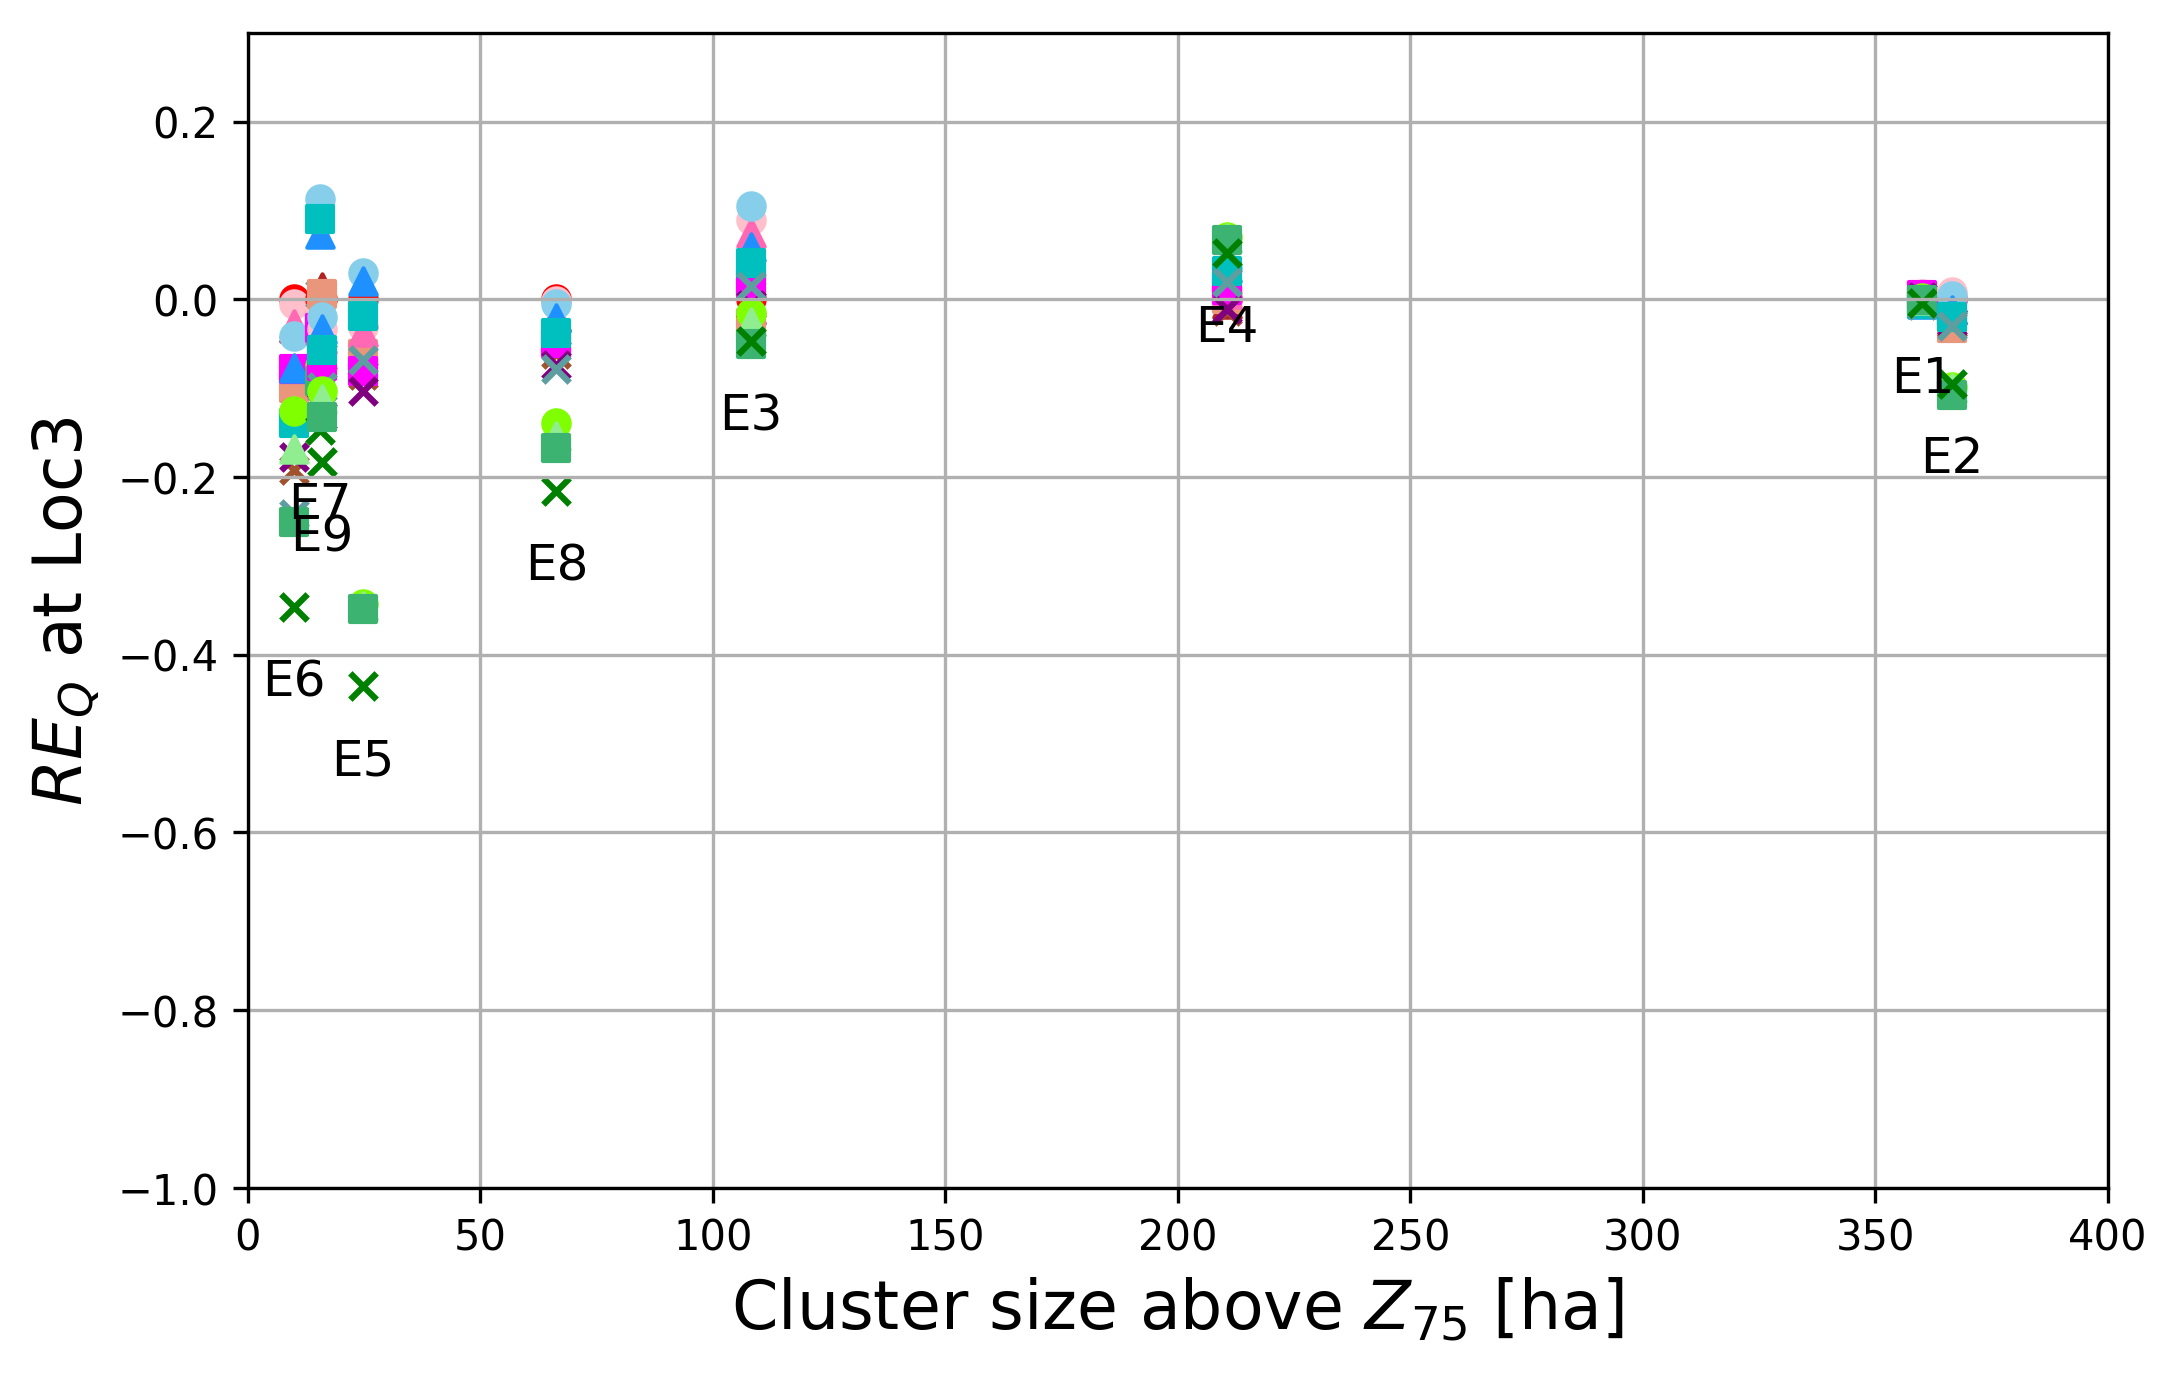

Supplement: Supplementary file 1 [file hess-22-2425-2018-supplement.zip › Order/RE_S7_loc3.png]

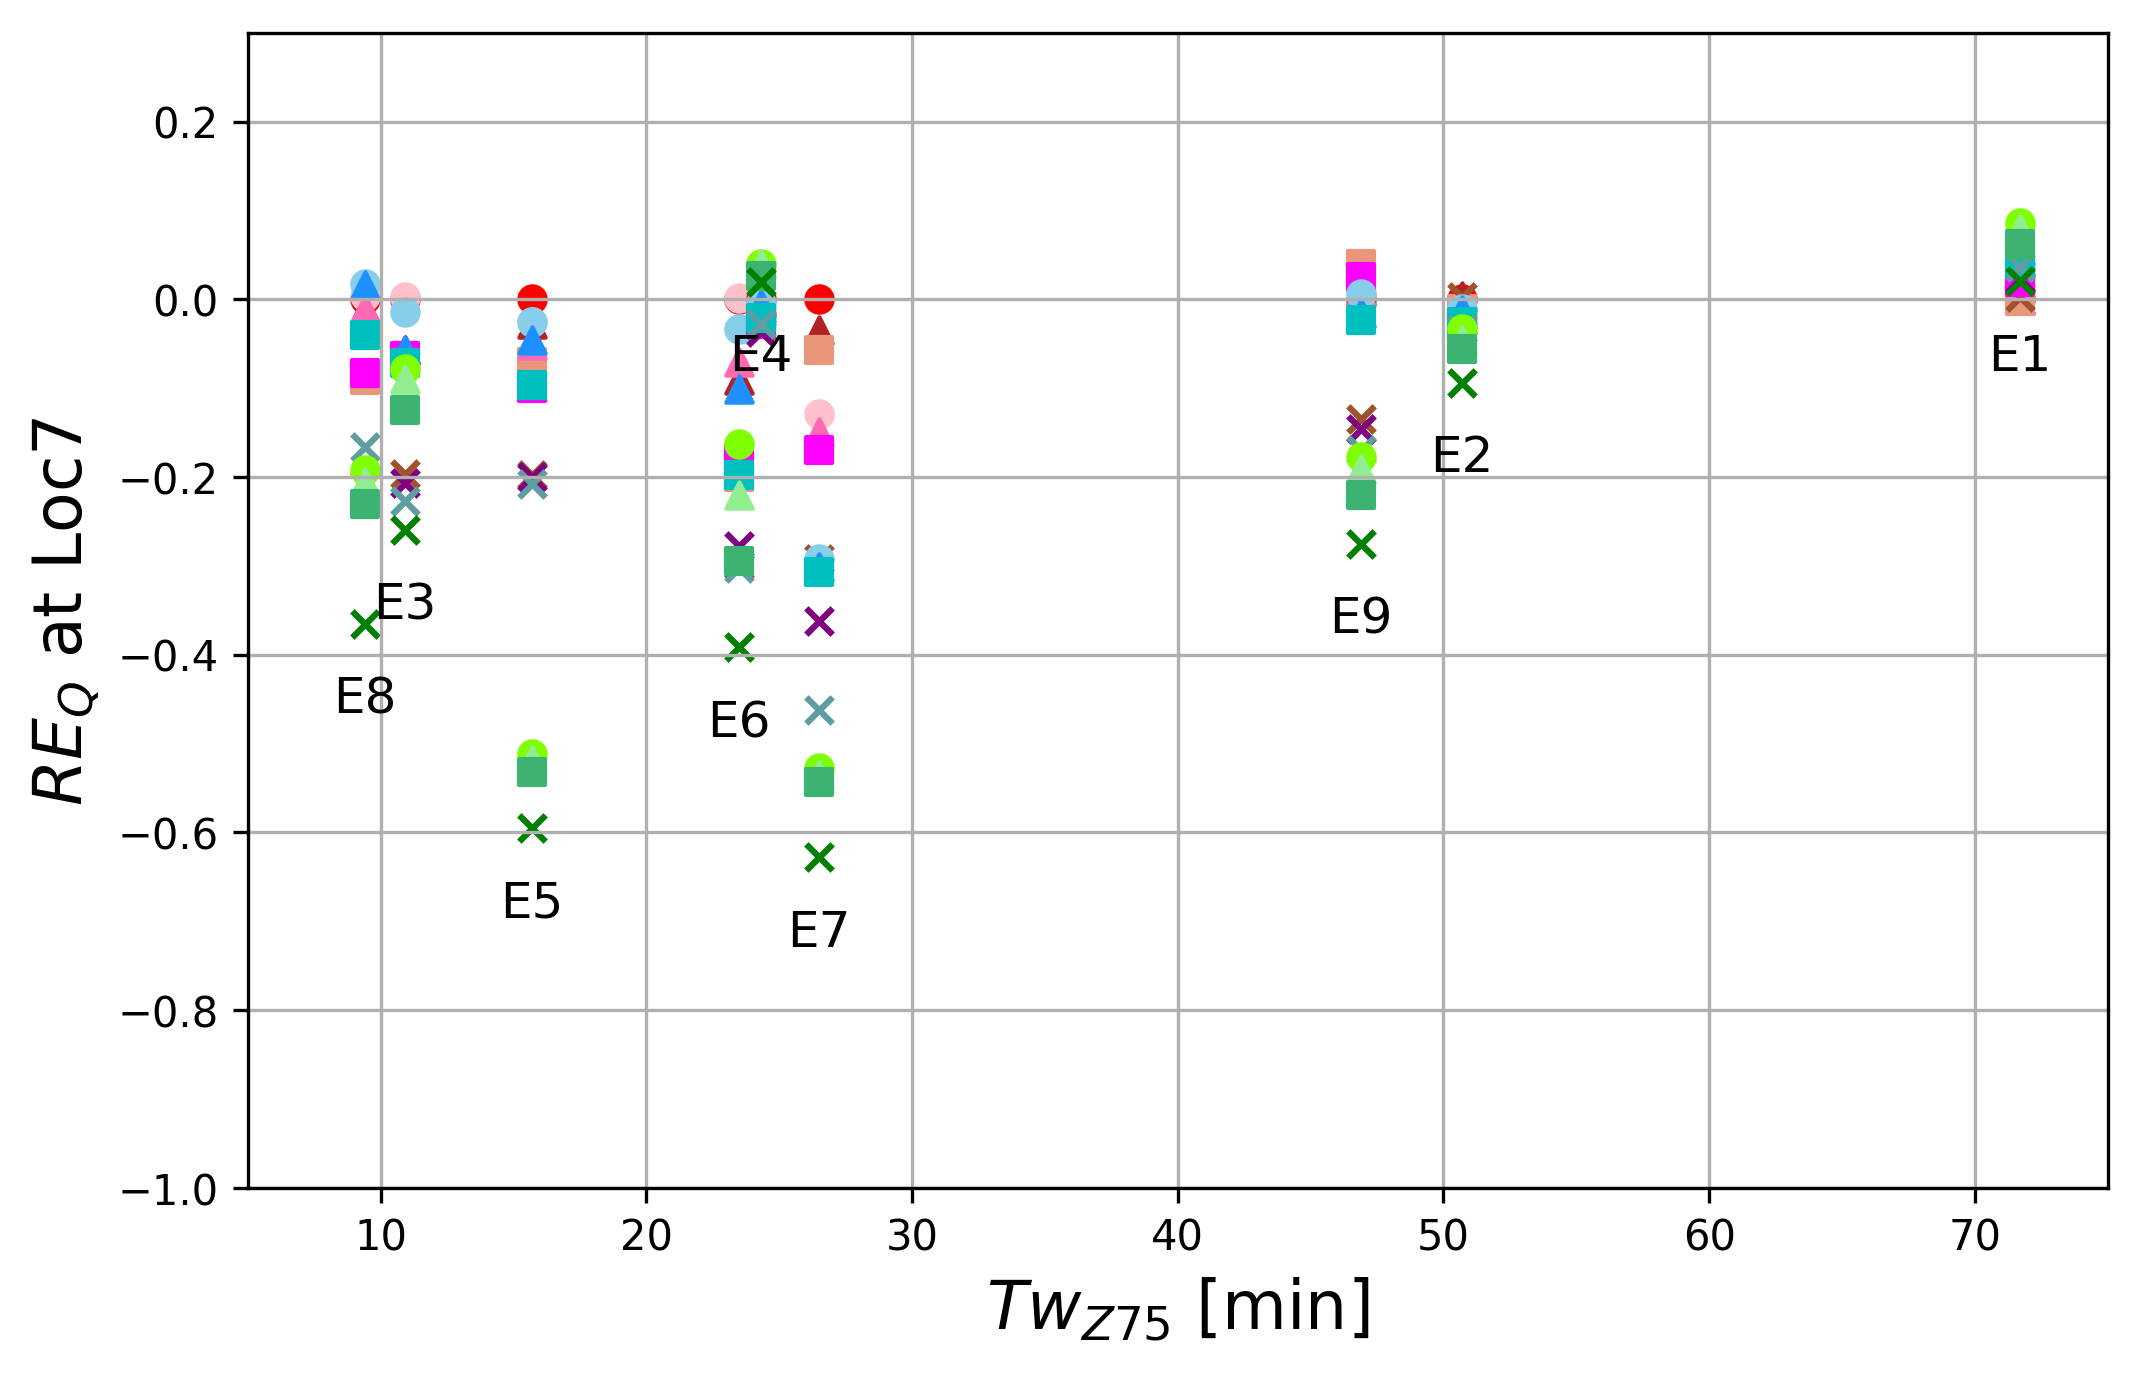

Supplement: Supplementary file 1 [file hess-22-2425-2018-supplement.zip › Order/RE_T7plus_loc7.png]

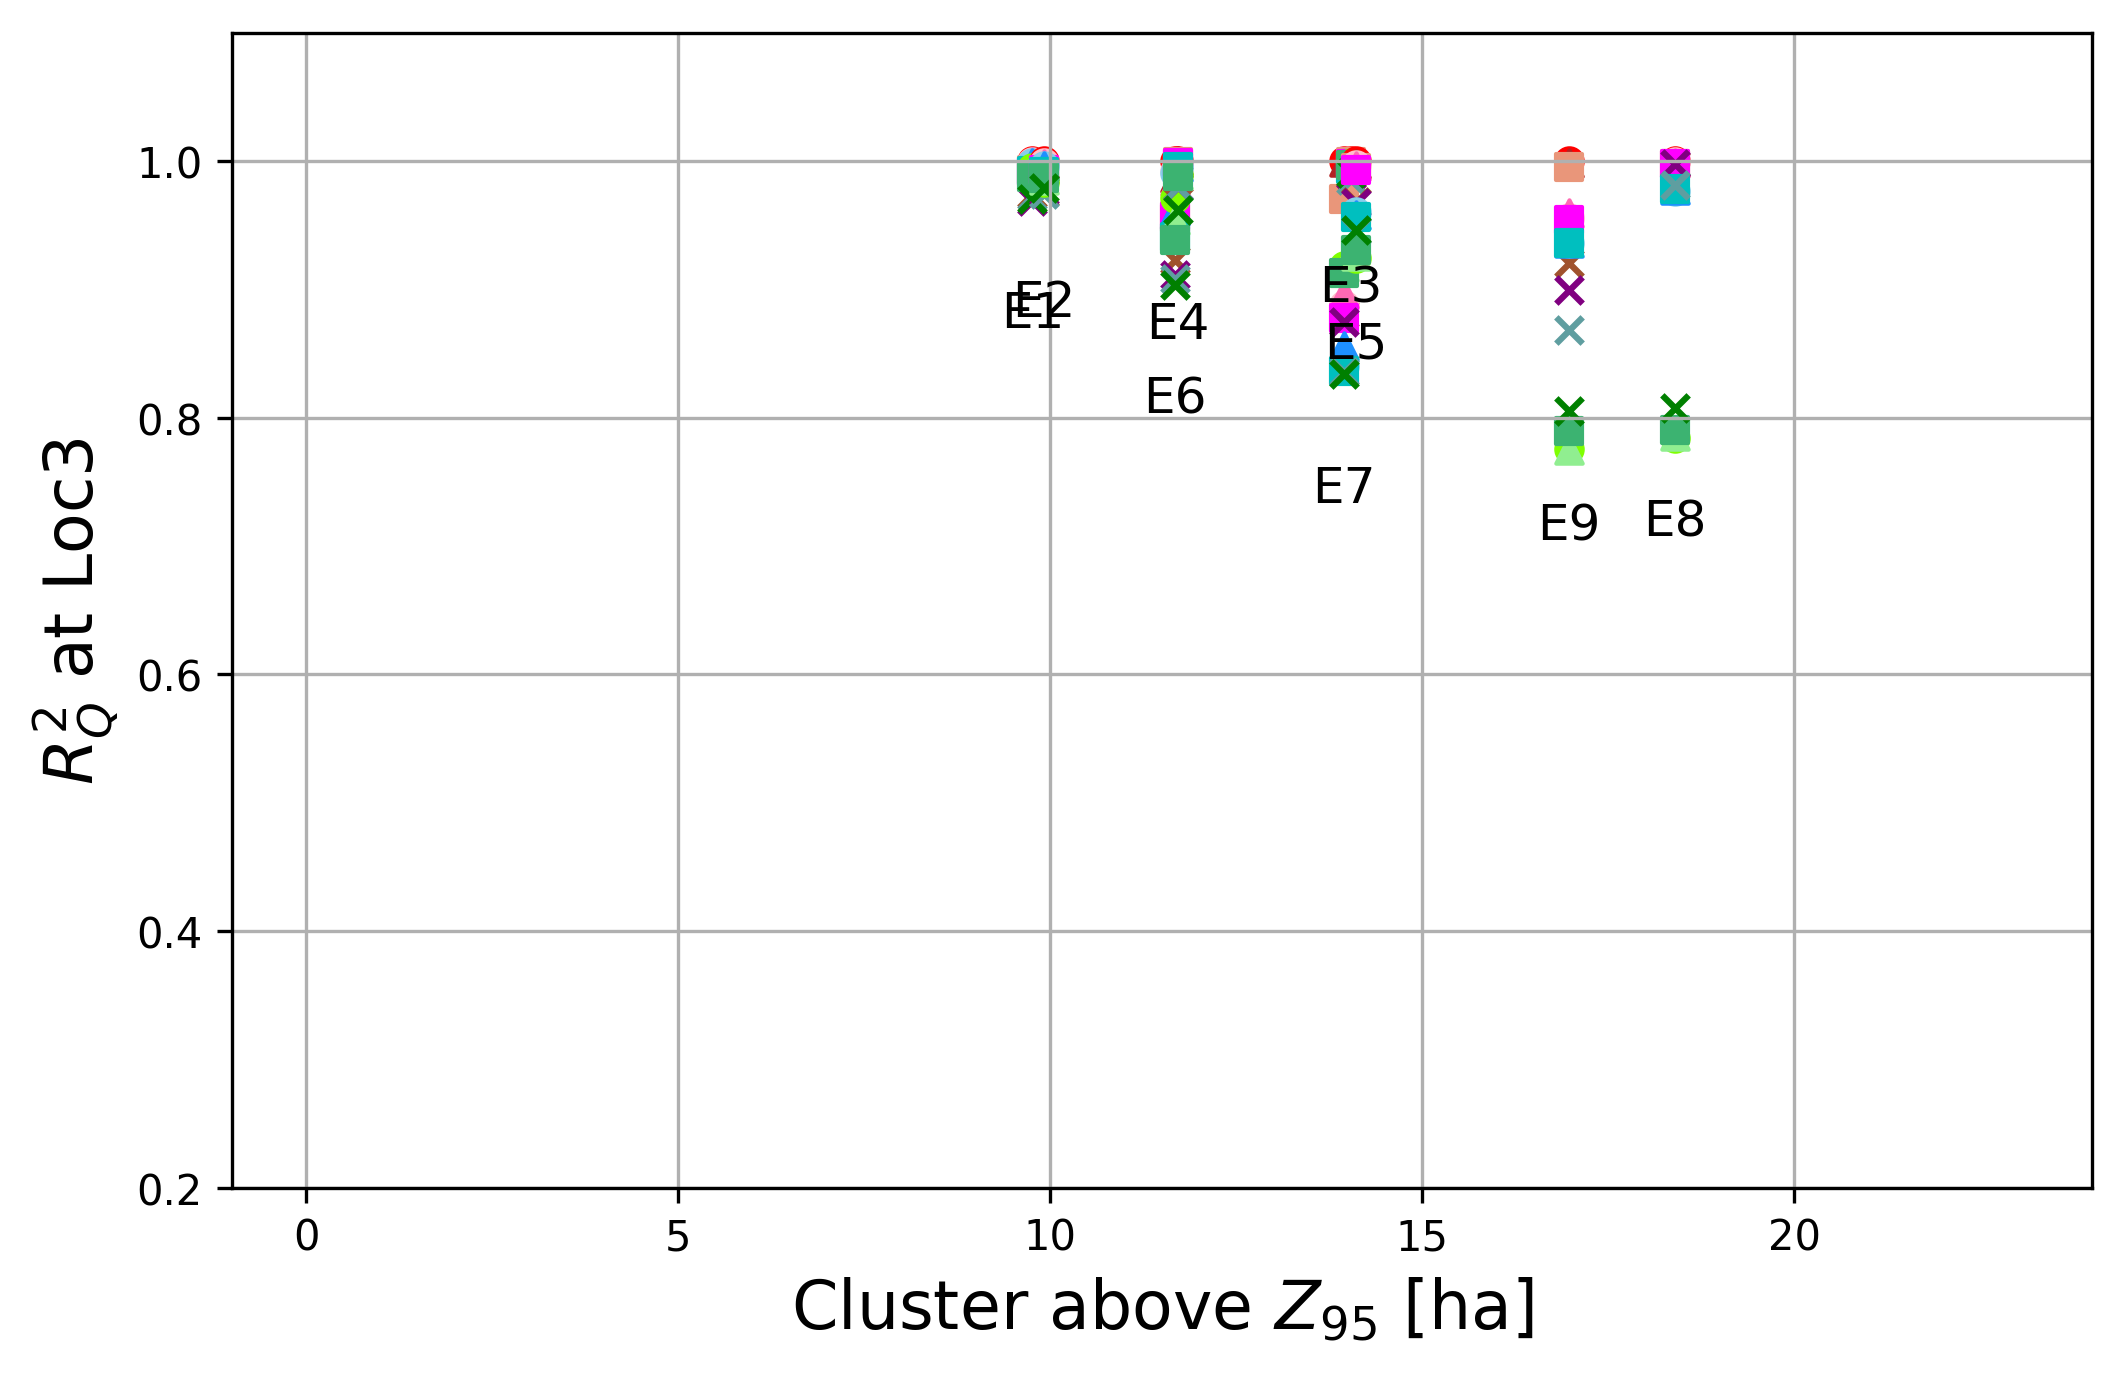

Supplement: Supplementary file 1 [file hess-22-2425-2018-supplement.zip › Order/R2_S22_loc3.png]

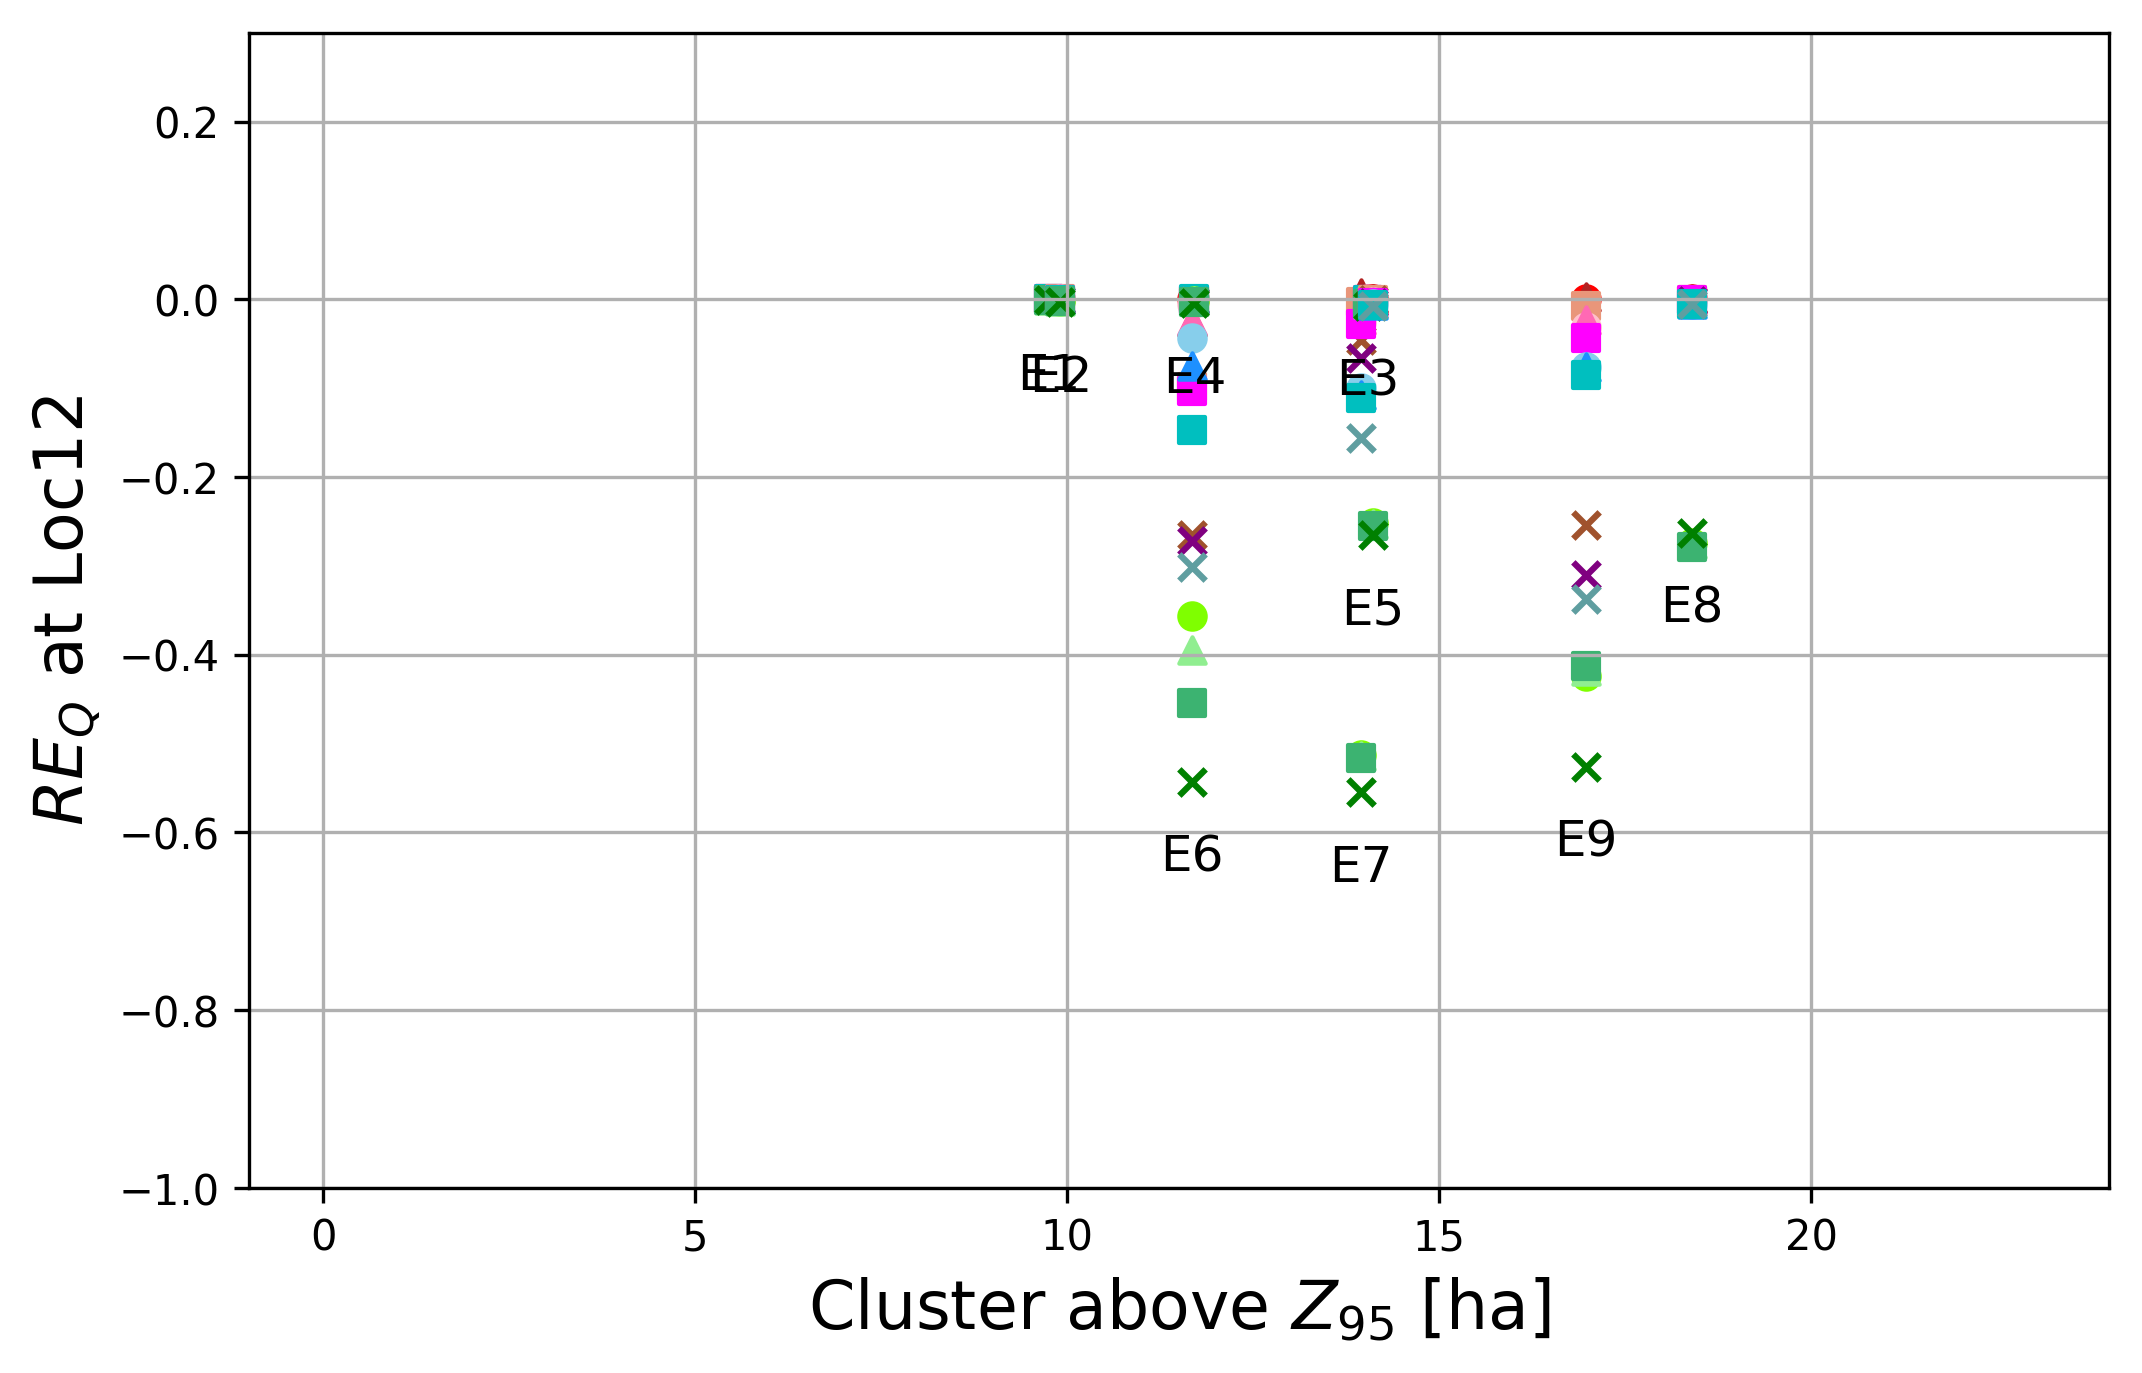

Supplement: Supplementary file 1 [file hess-22-2425-2018-supplement.zip › Order/RE_S22_loc12.png]

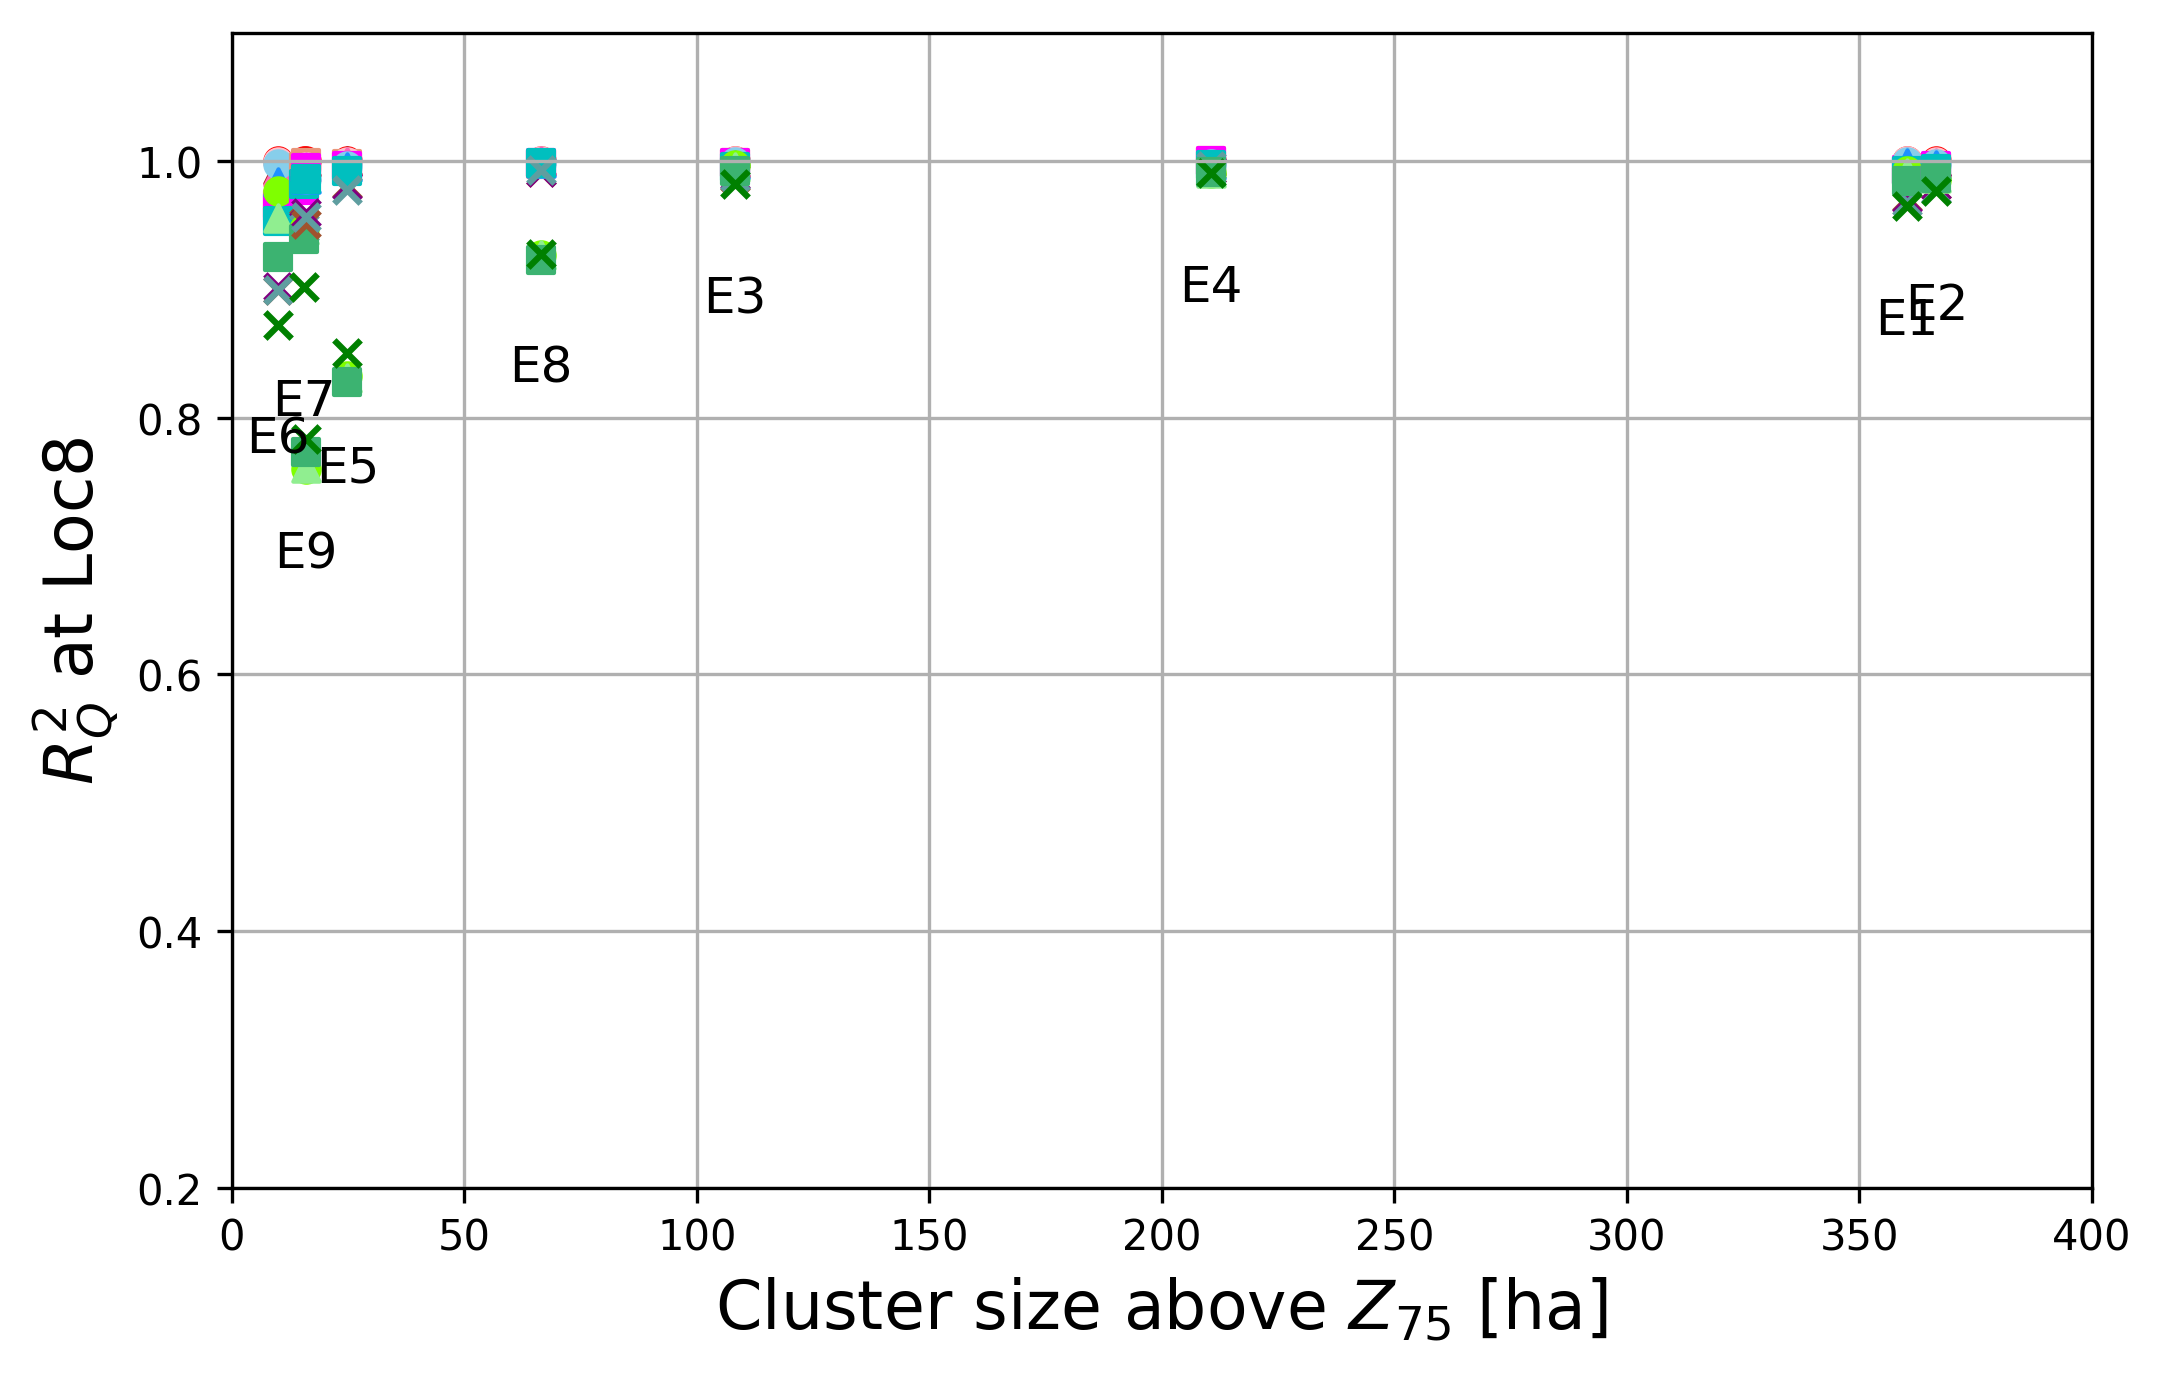

Supplement: Supplementary file 1 [file hess-22-2425-2018-supplement.zip › Order/R2_S7_loc8.png]

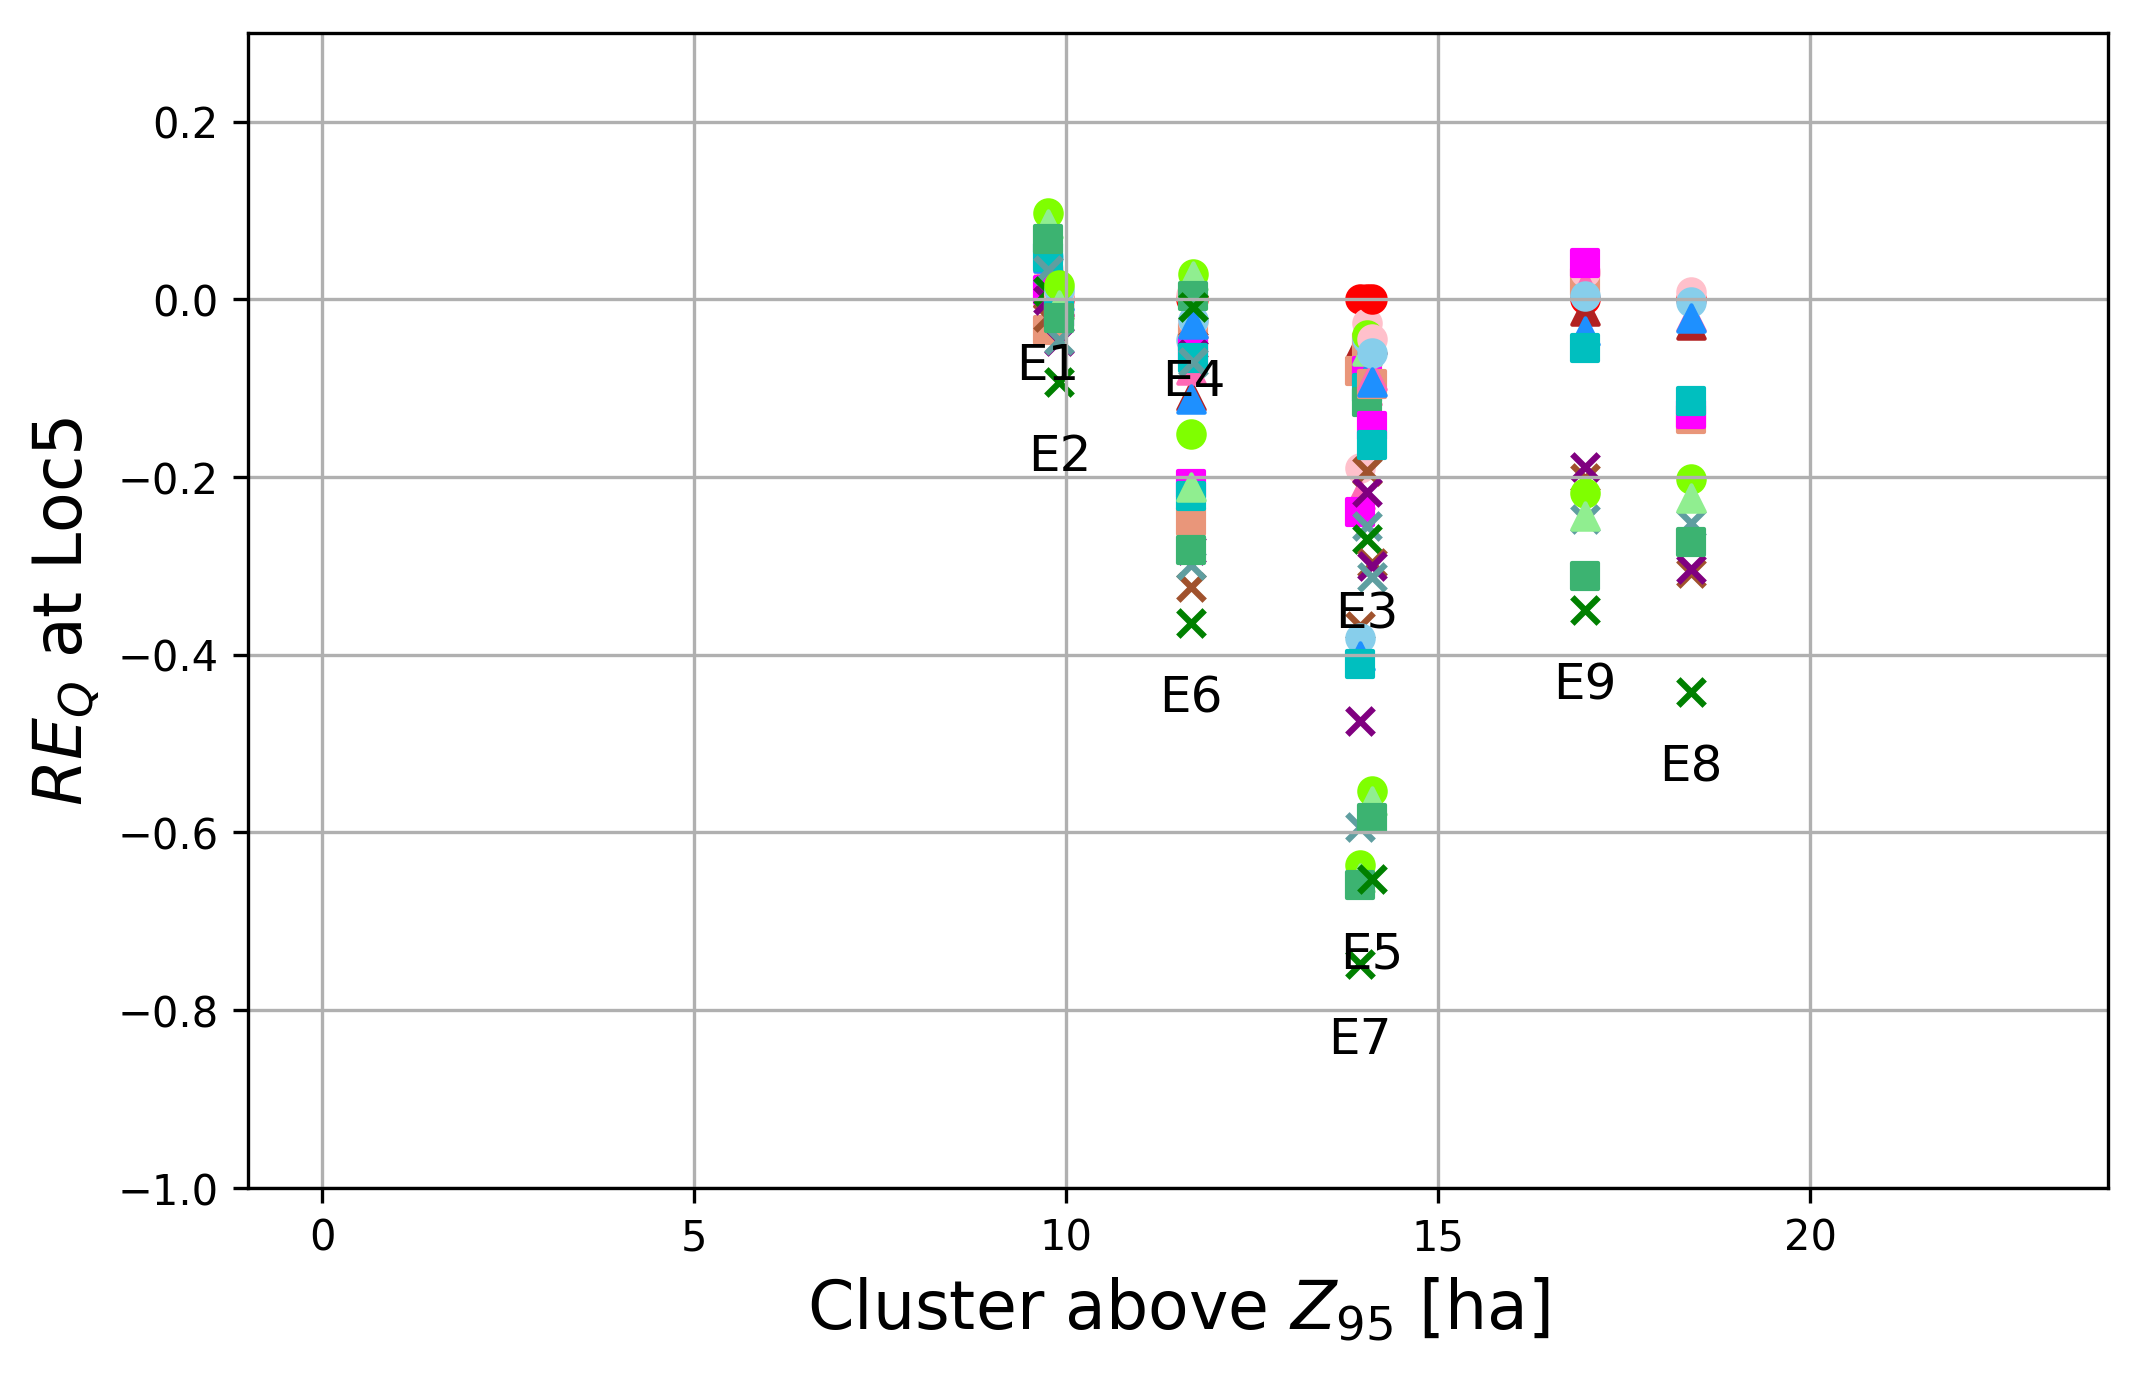

Supplement: Supplementary file 1 [file hess-22-2425-2018-supplement.zip › Order/RE_S22_loc5.png]

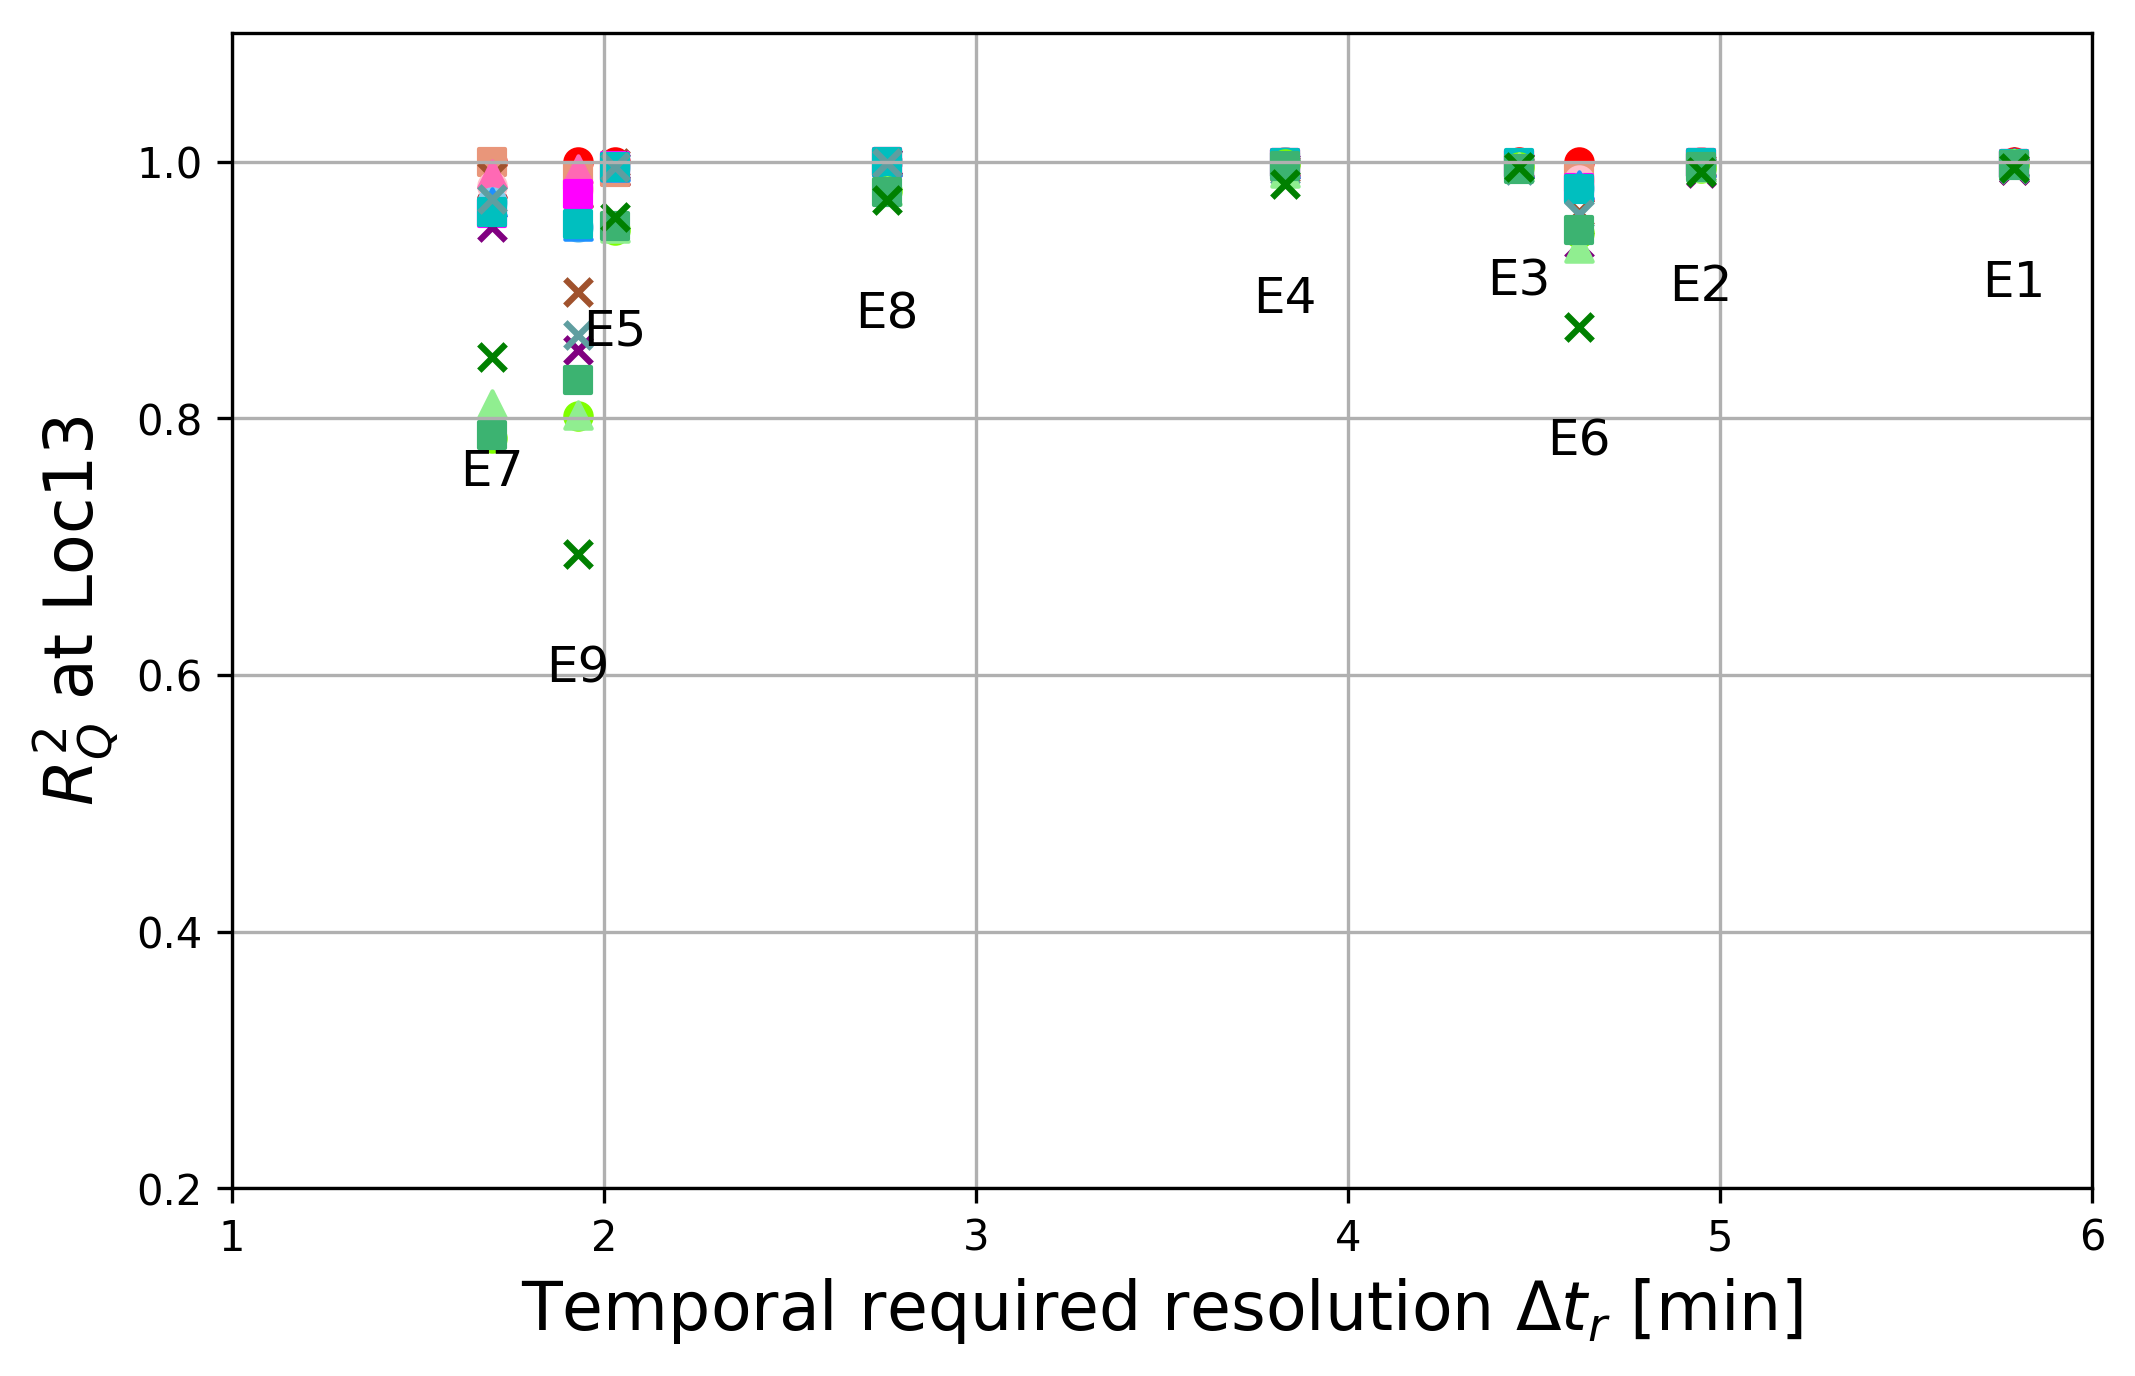

Supplement: Supplementary file 1 [file hess-22-2425-2018-supplement.zip › Order/R2_OchoaT_loc13.png]

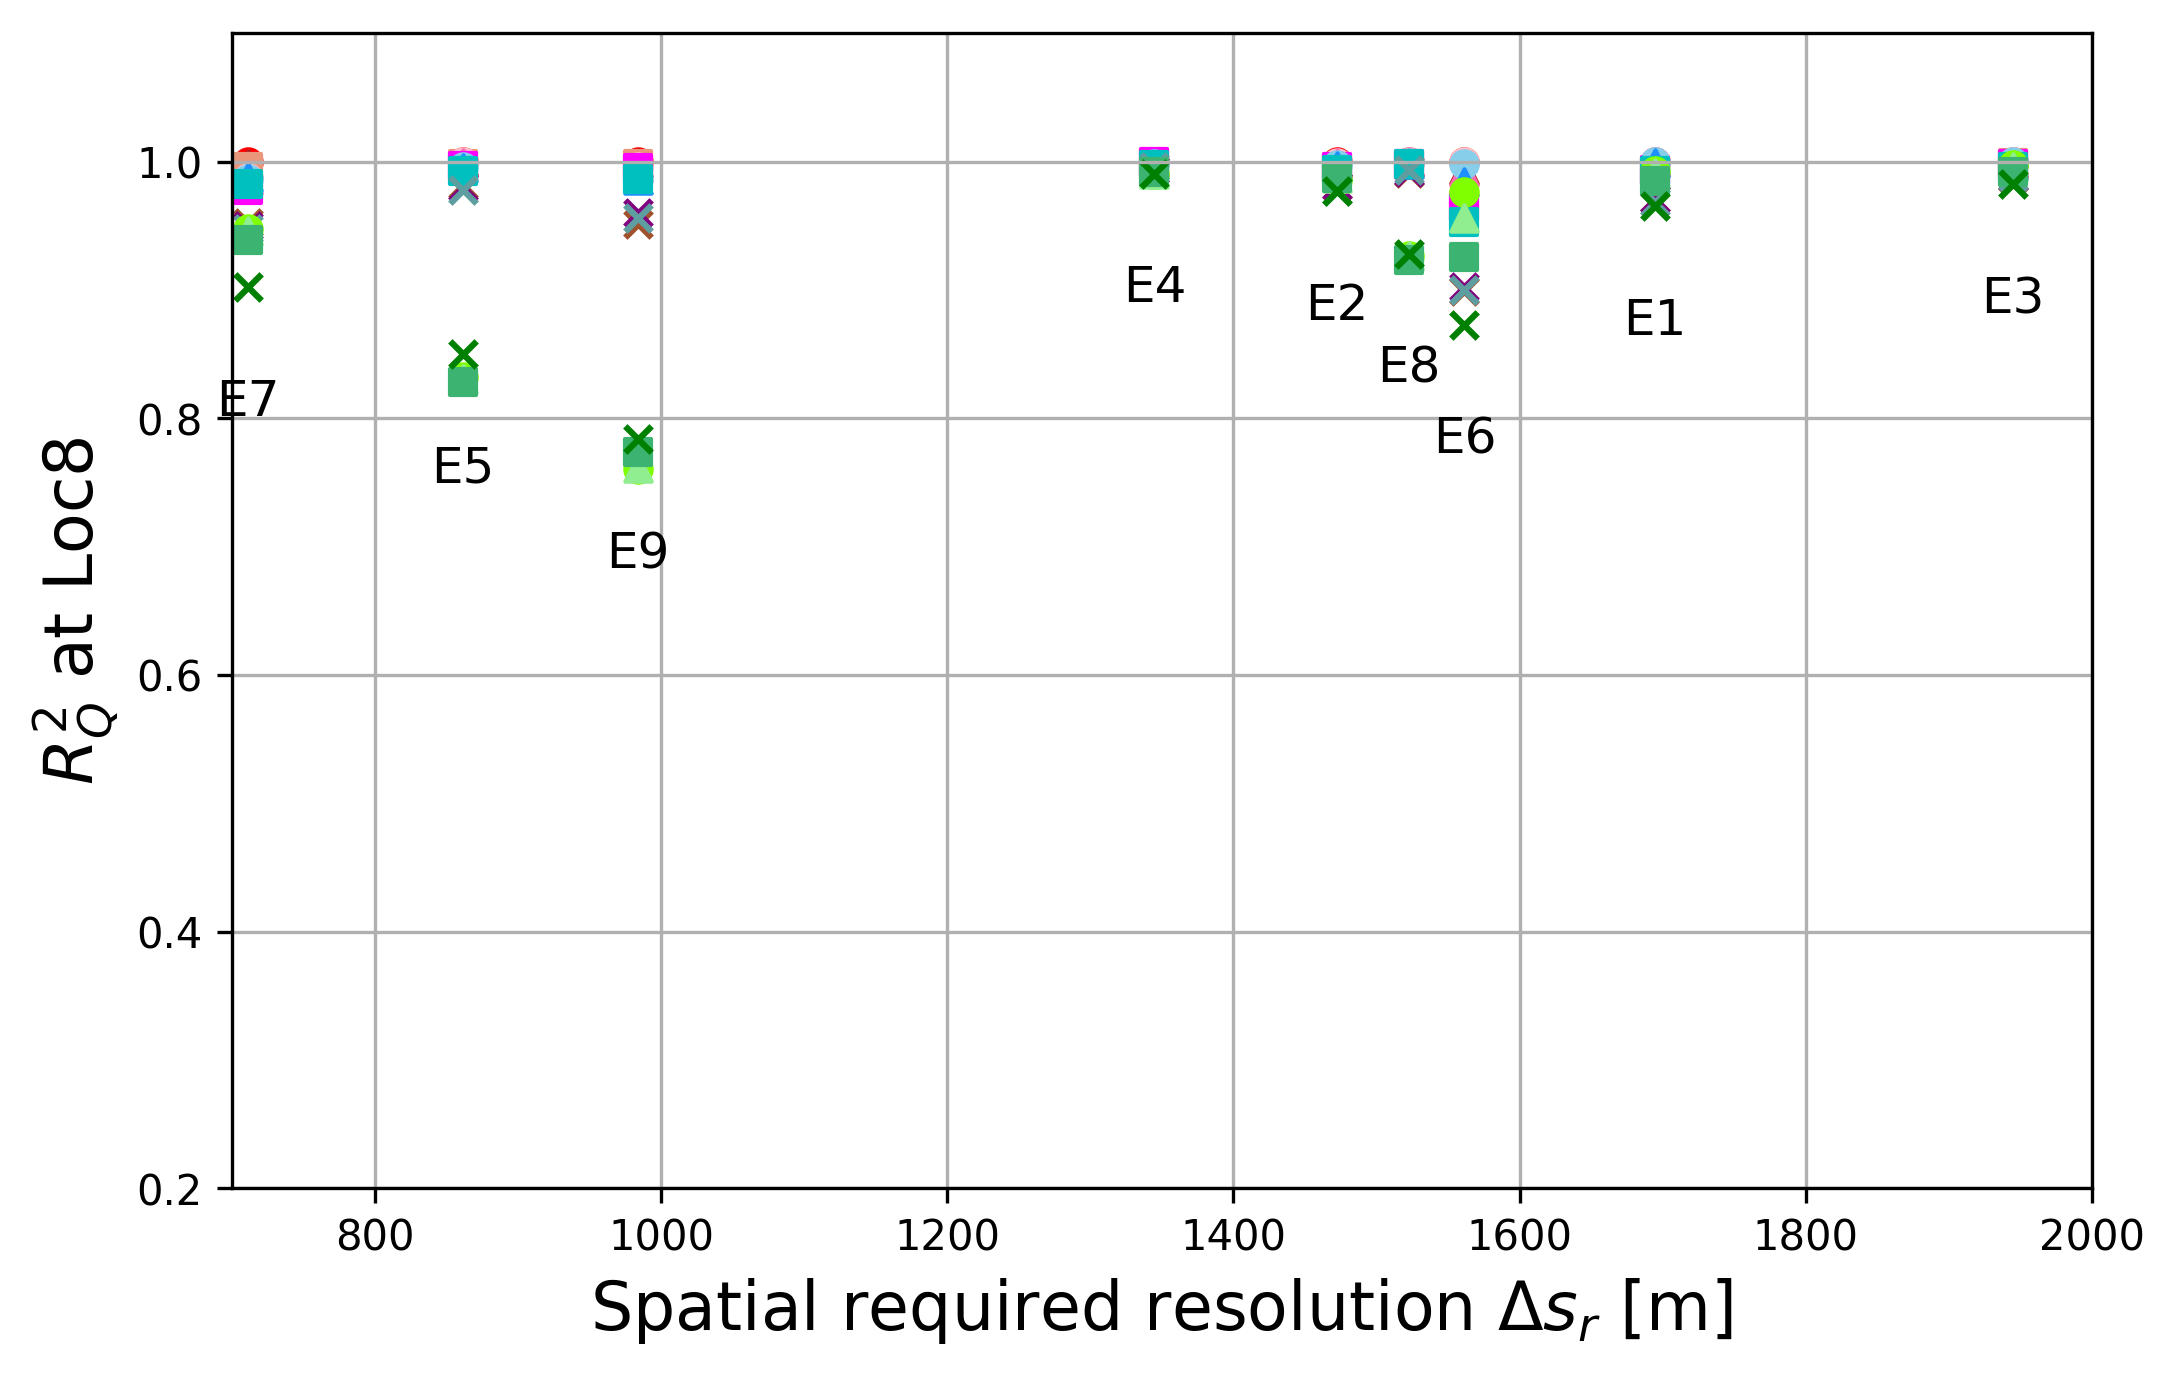

Supplement: Supplementary file 1 [file hess-22-2425-2018-supplement.zip › Order/R2_OchoaS_loc8.png]

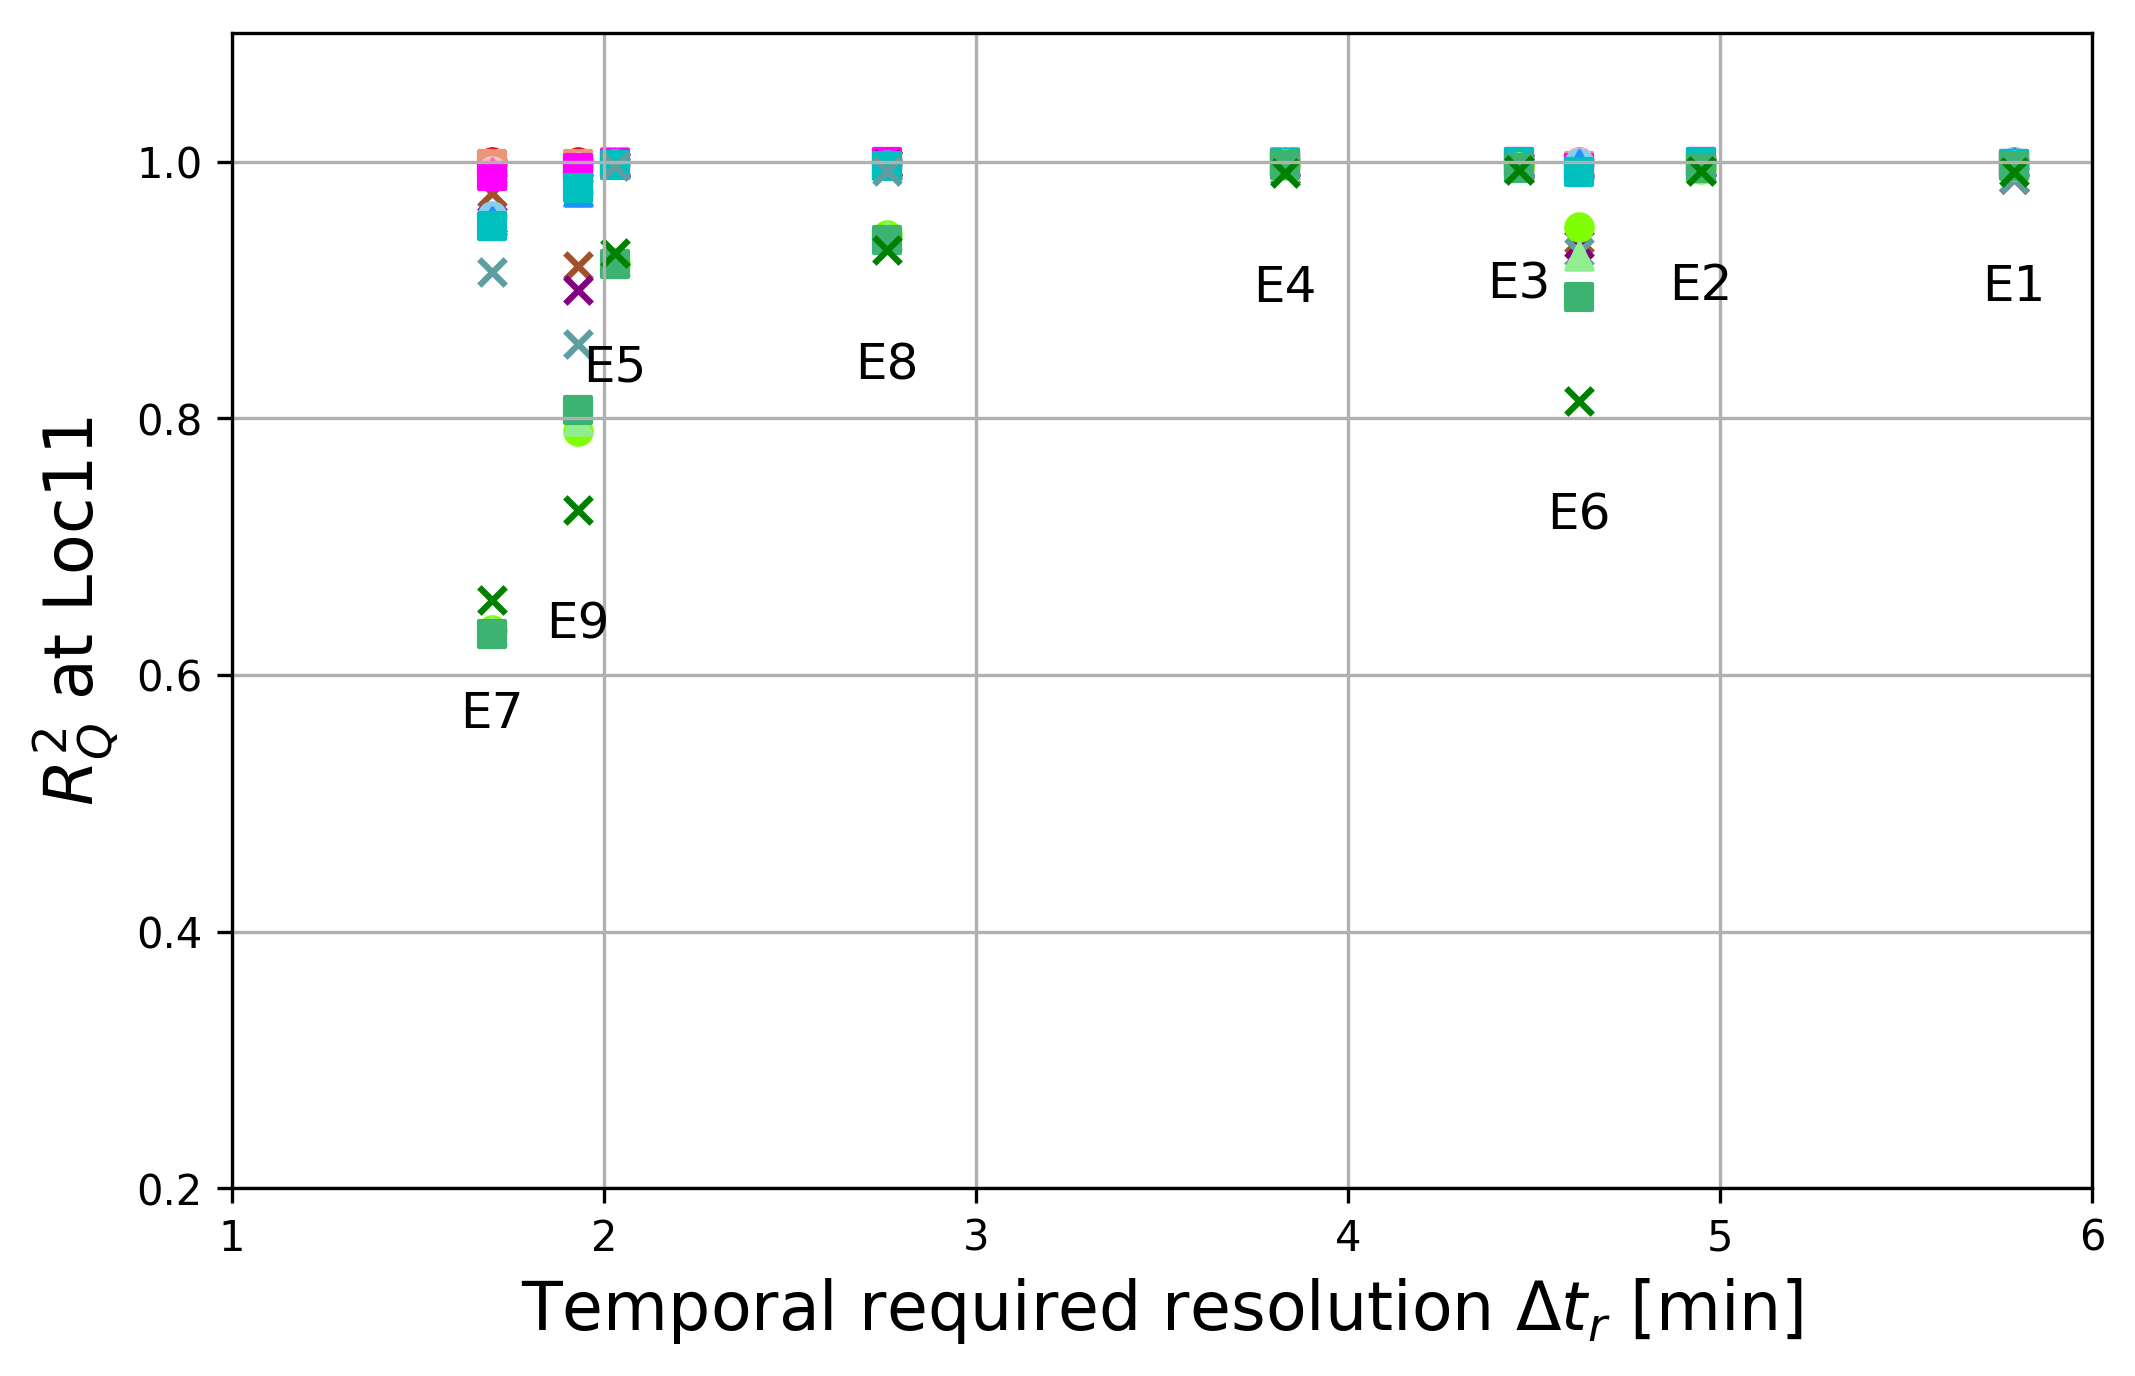

Supplement: Supplementary file 1 [file hess-22-2425-2018-supplement.zip › Order/R2_OchoaT_loc11.png]

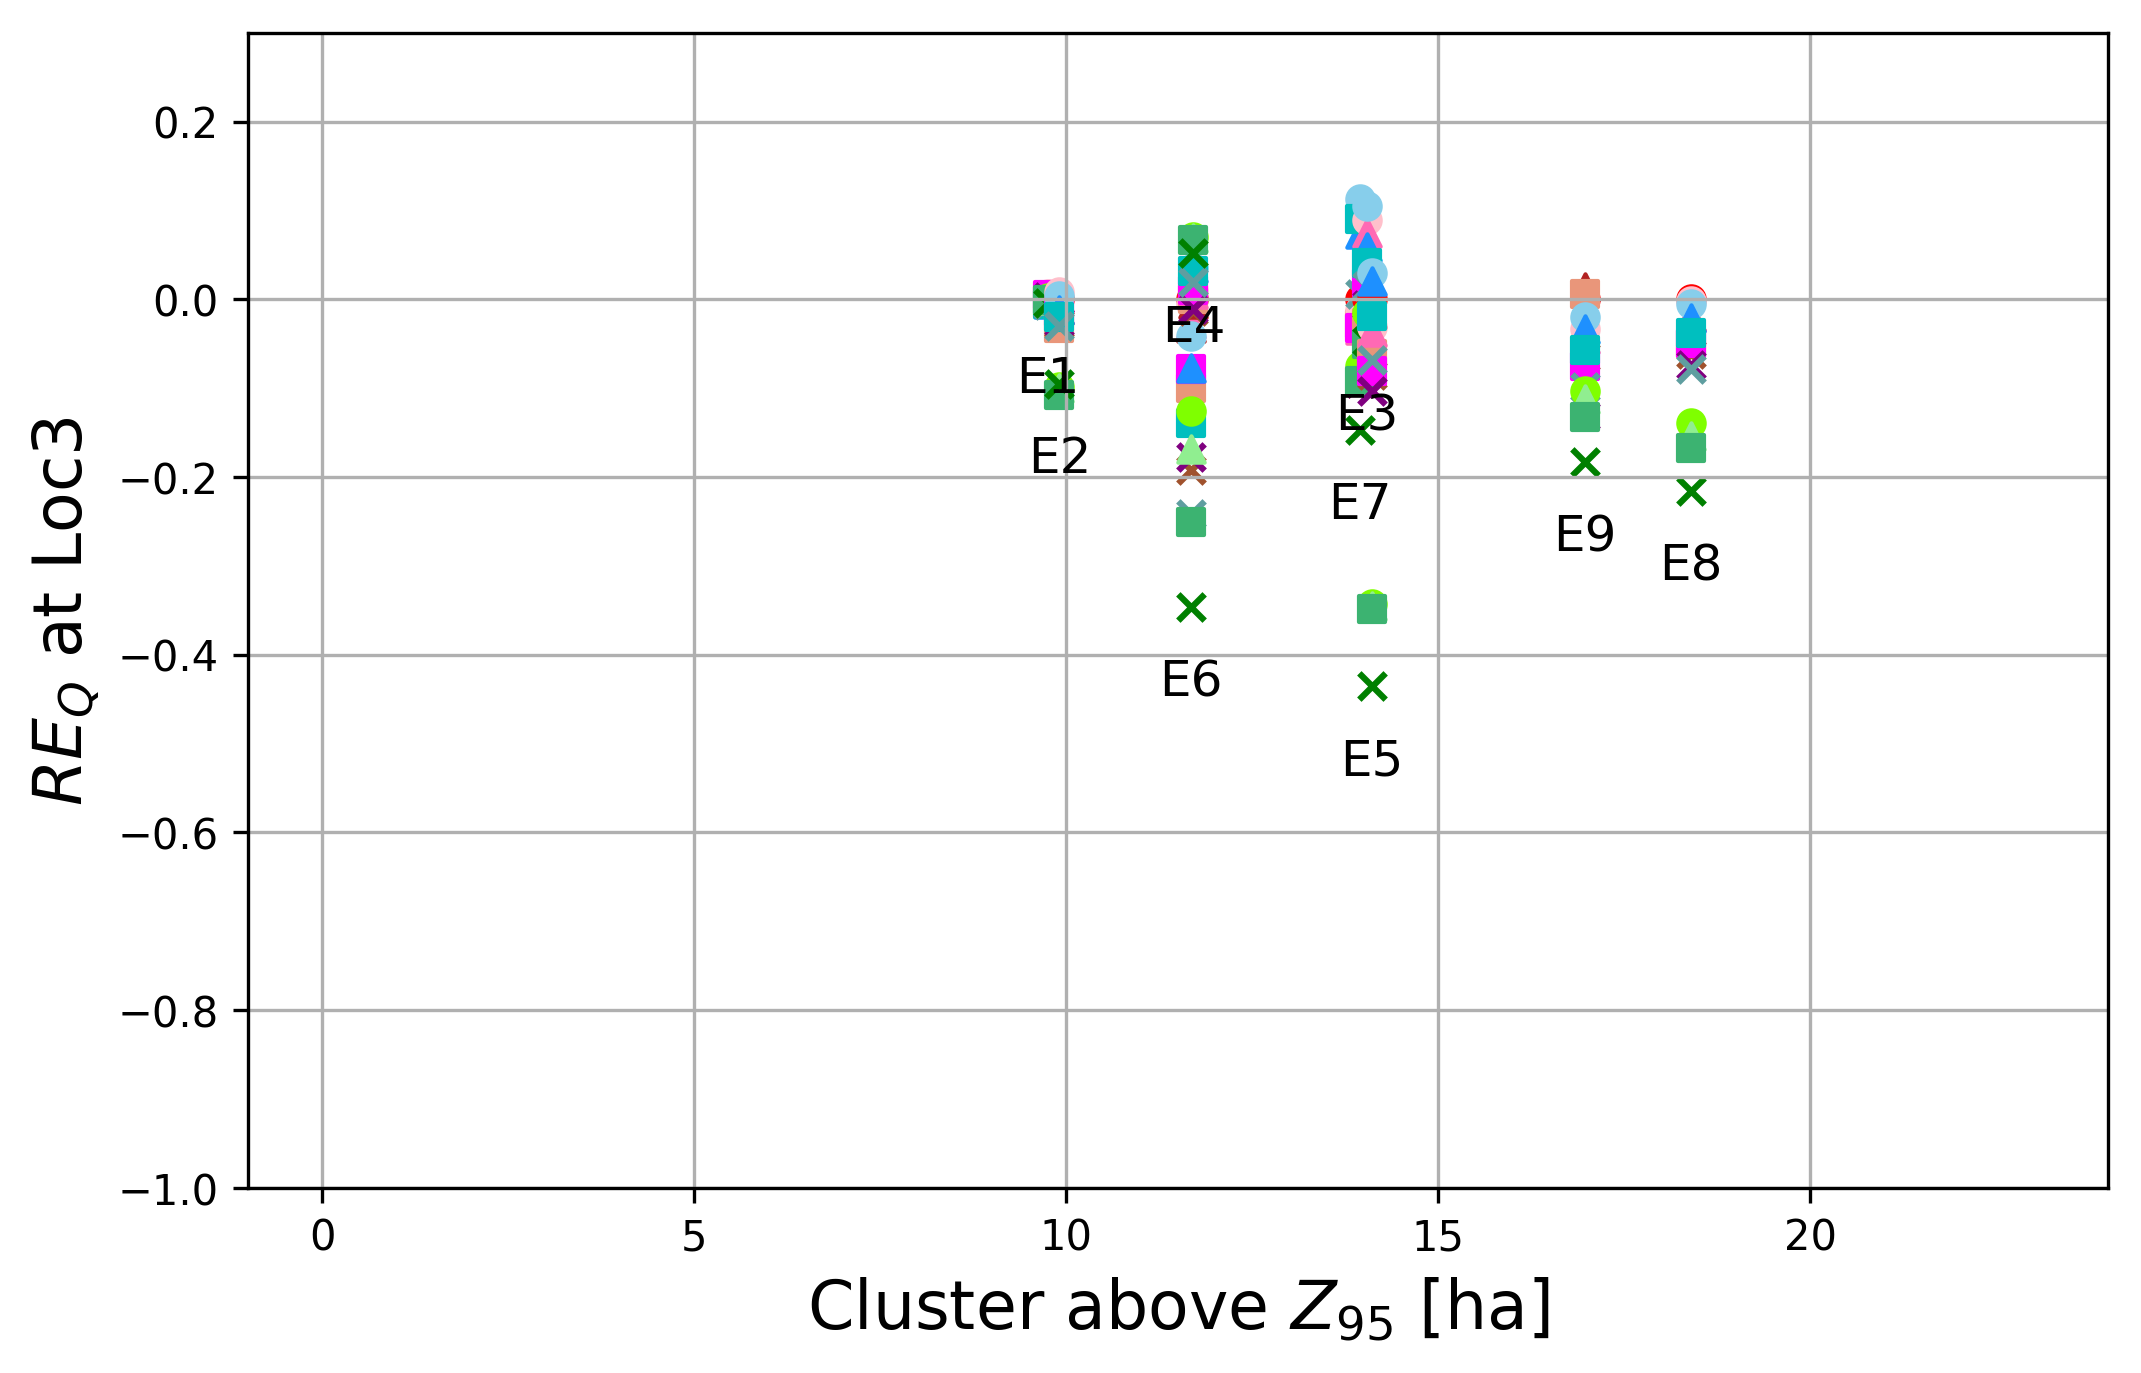

Supplement: Supplementary file 1 [file hess-22-2425-2018-supplement.zip › Order/RE_S22_loc3.png]

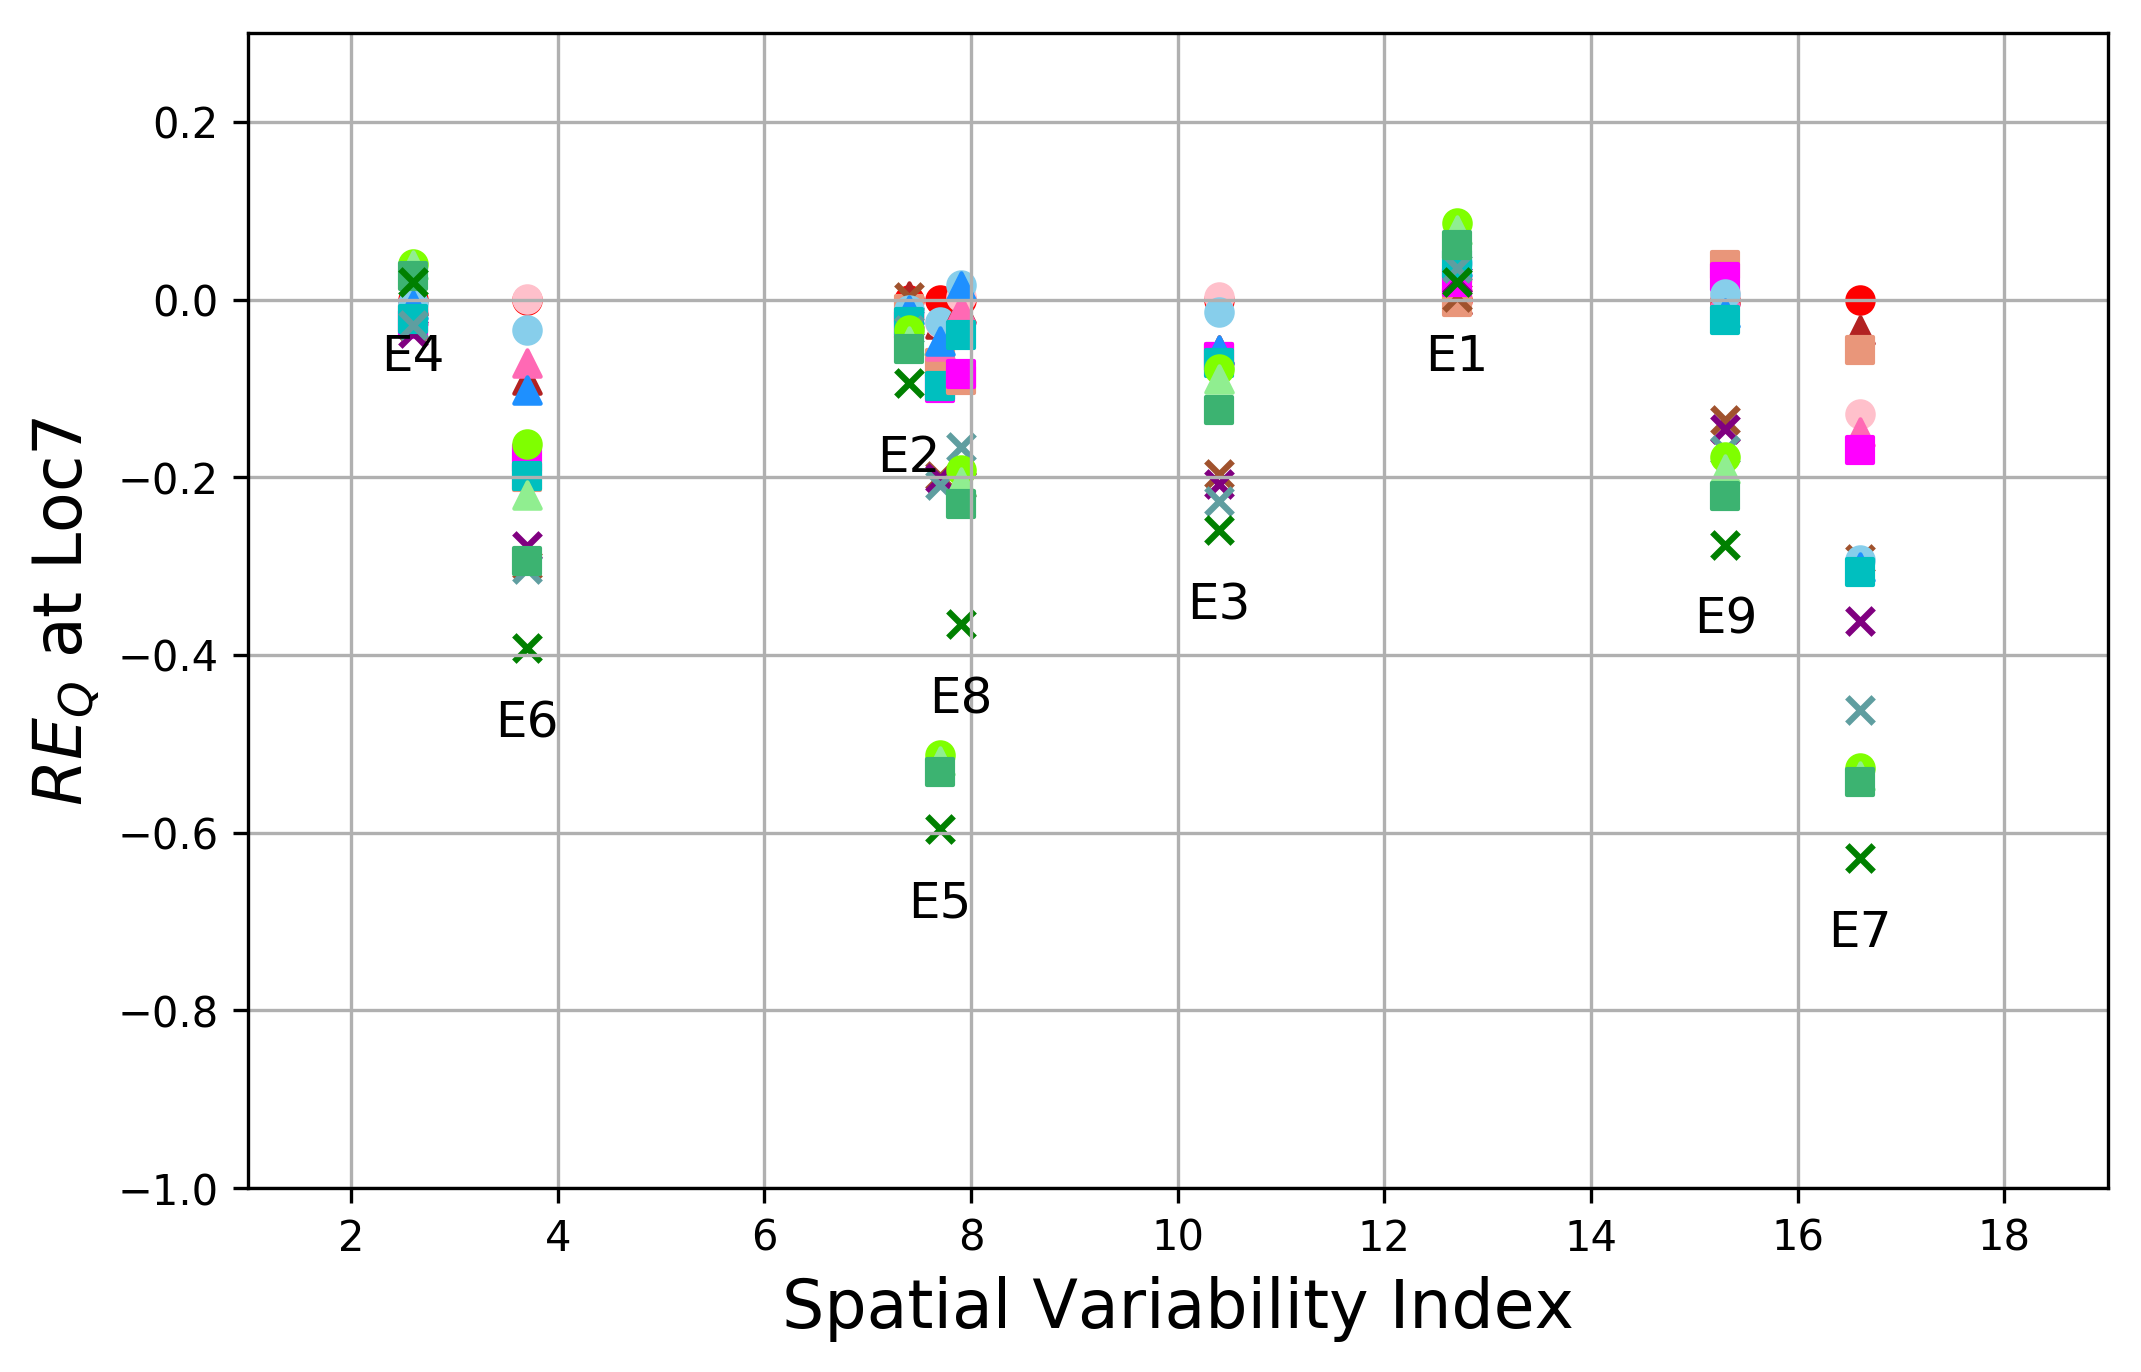

Supplement: Supplementary file 1 [file hess-22-2425-2018-supplement.zip › Order/RE_SVI_loc7.png]

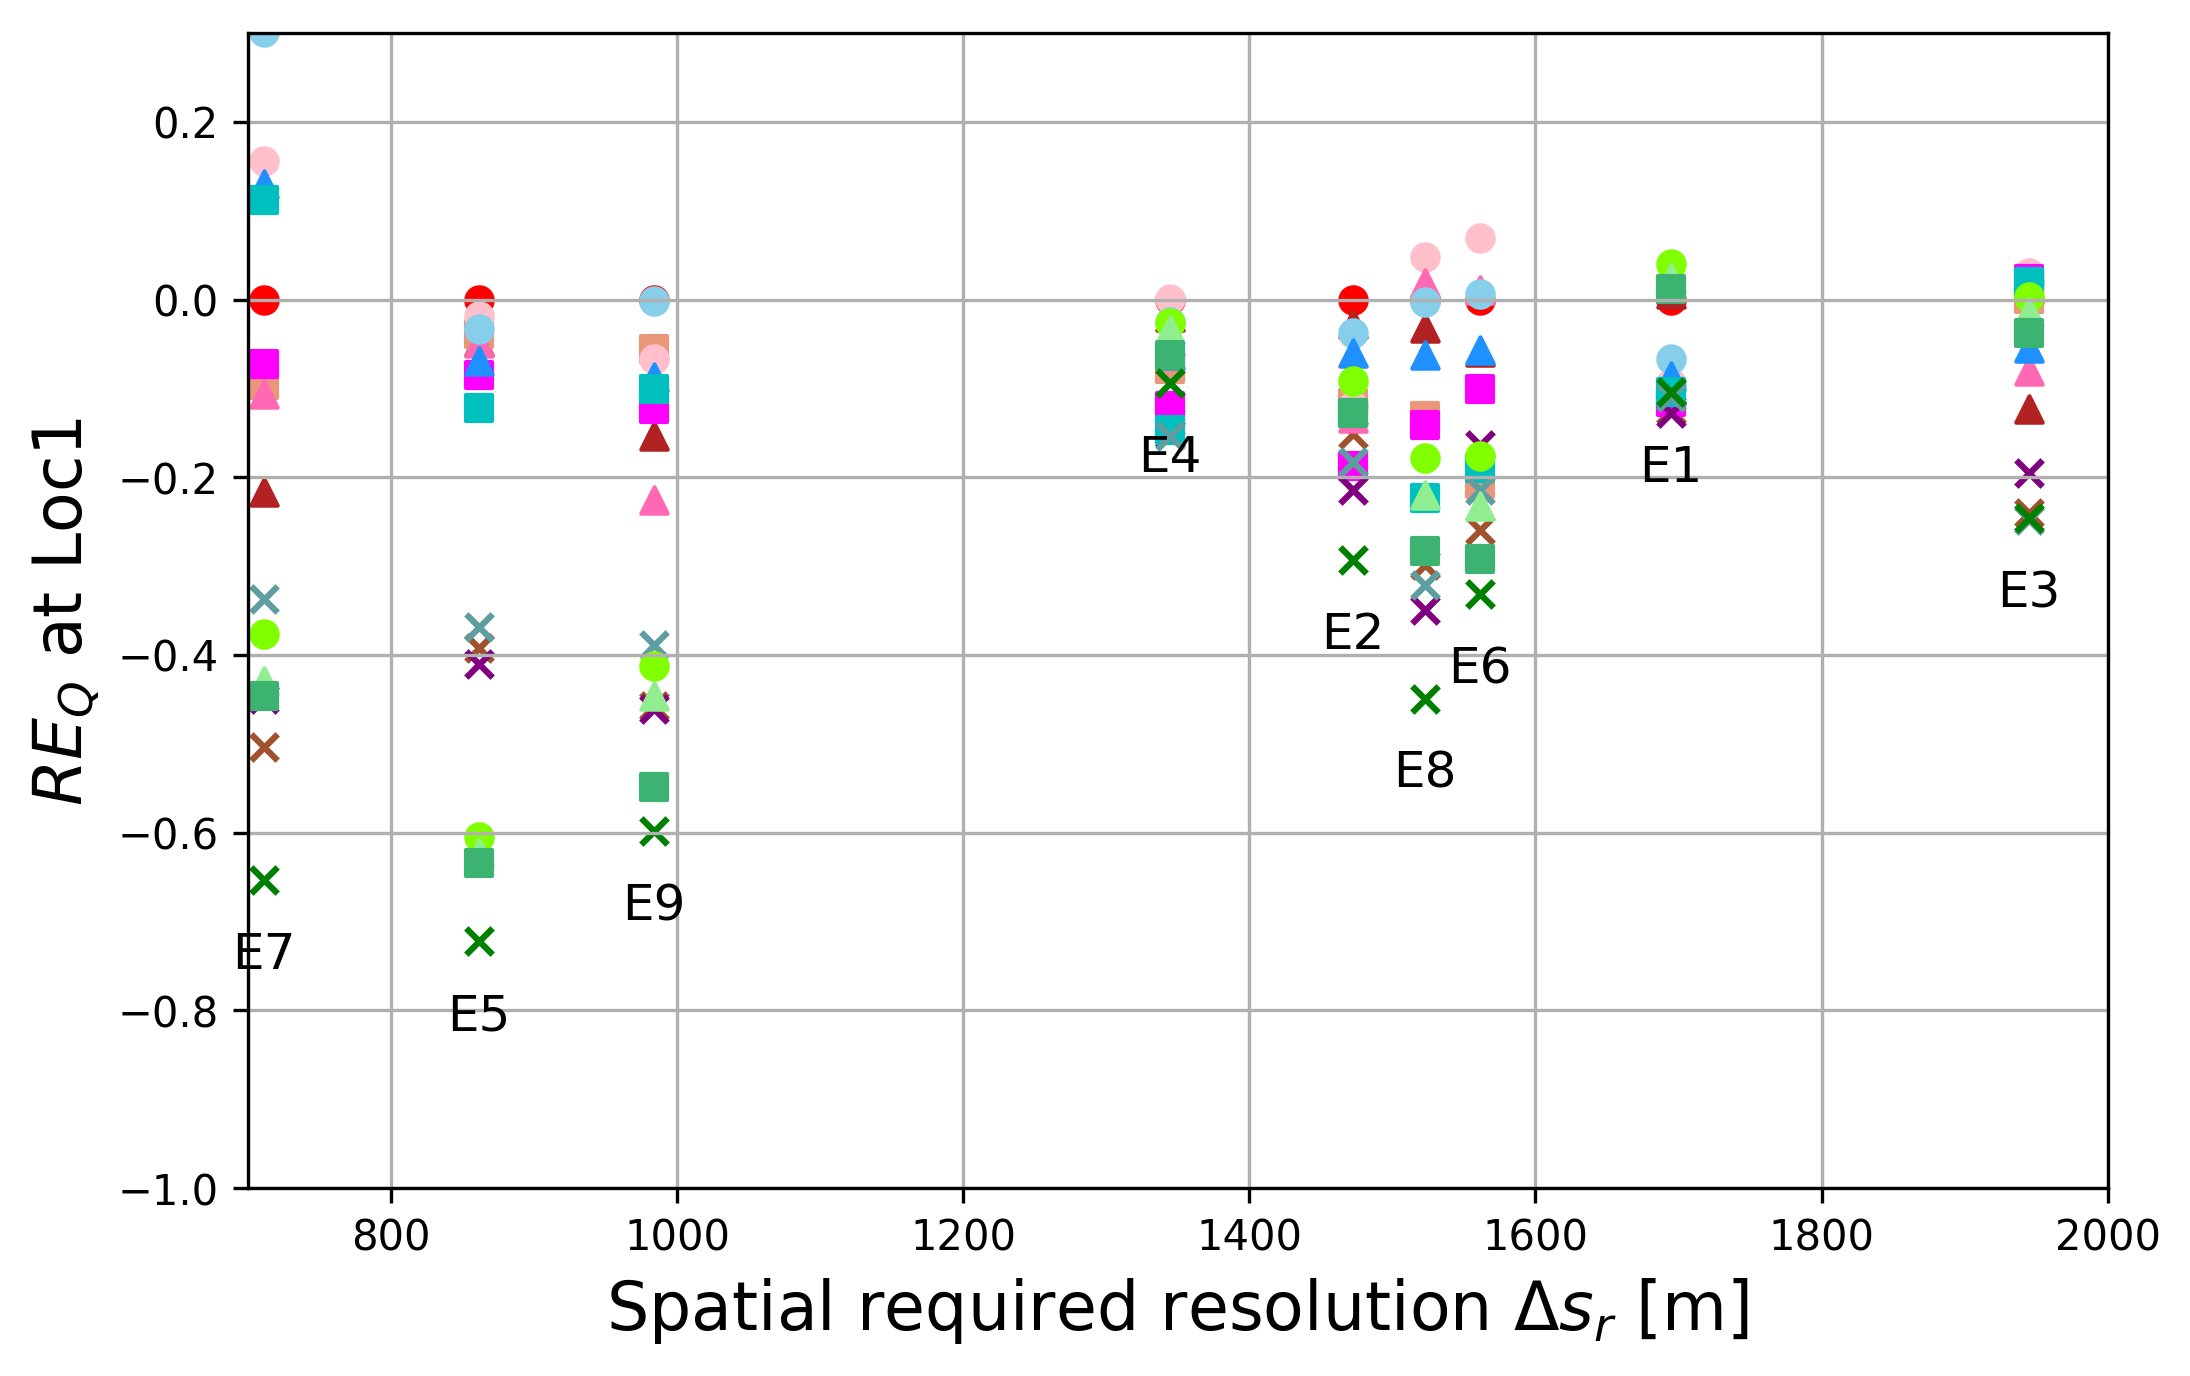

Supplement: Supplementary file 1 [file hess-22-2425-2018-supplement.zip › Order/RE_OchoaS_loc1.png]

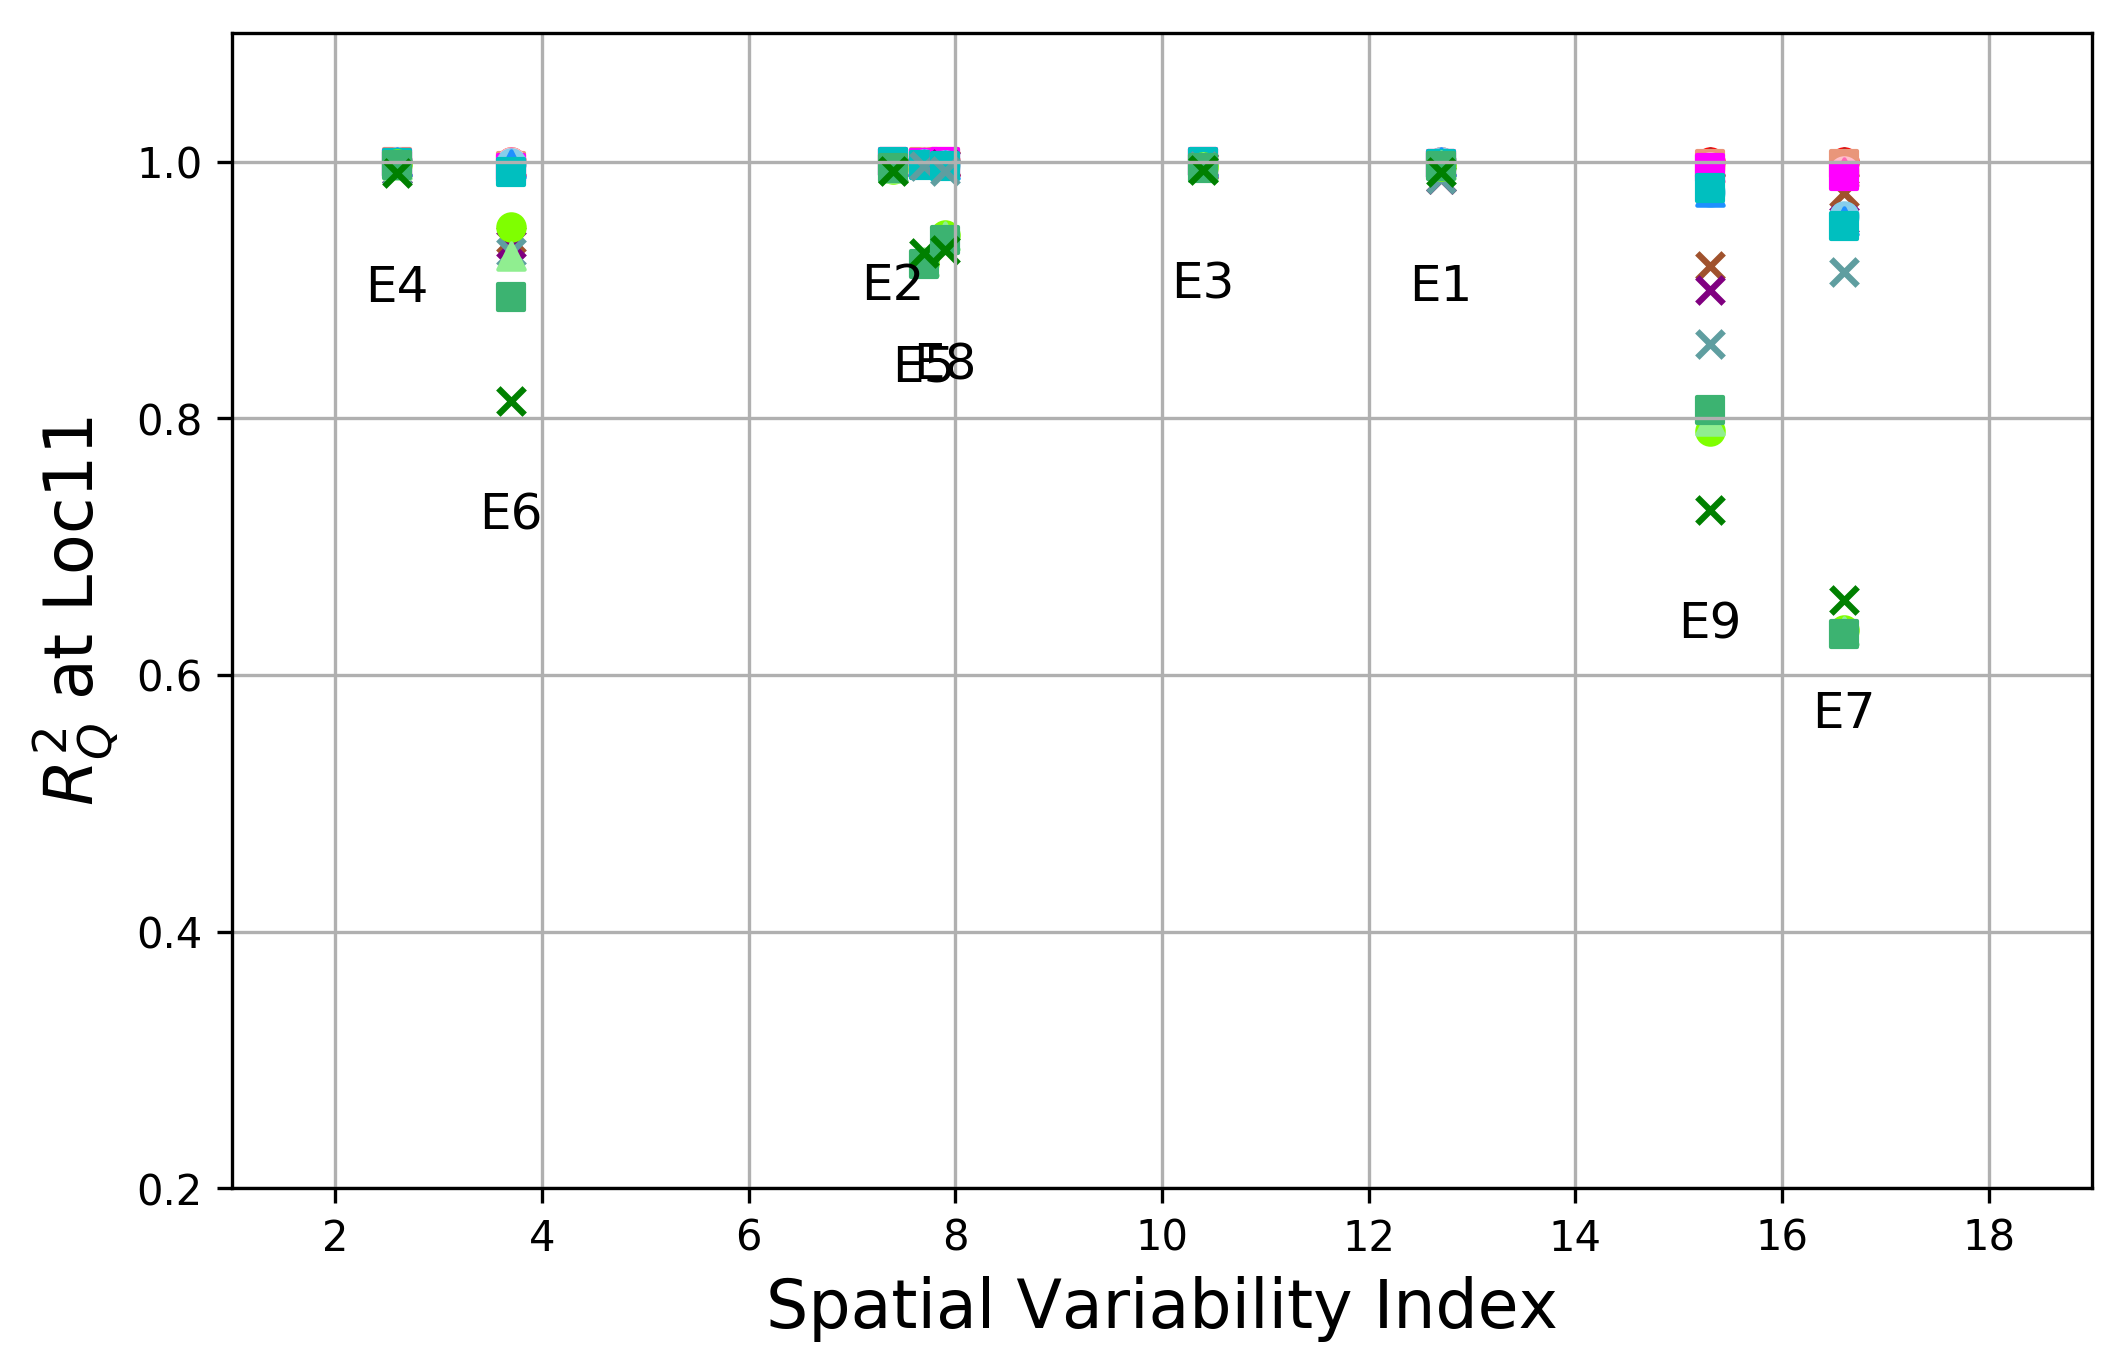

Supplement: Supplementary file 1 [file hess-22-2425-2018-supplement.zip › Order/R2_SVI_loc11.png]

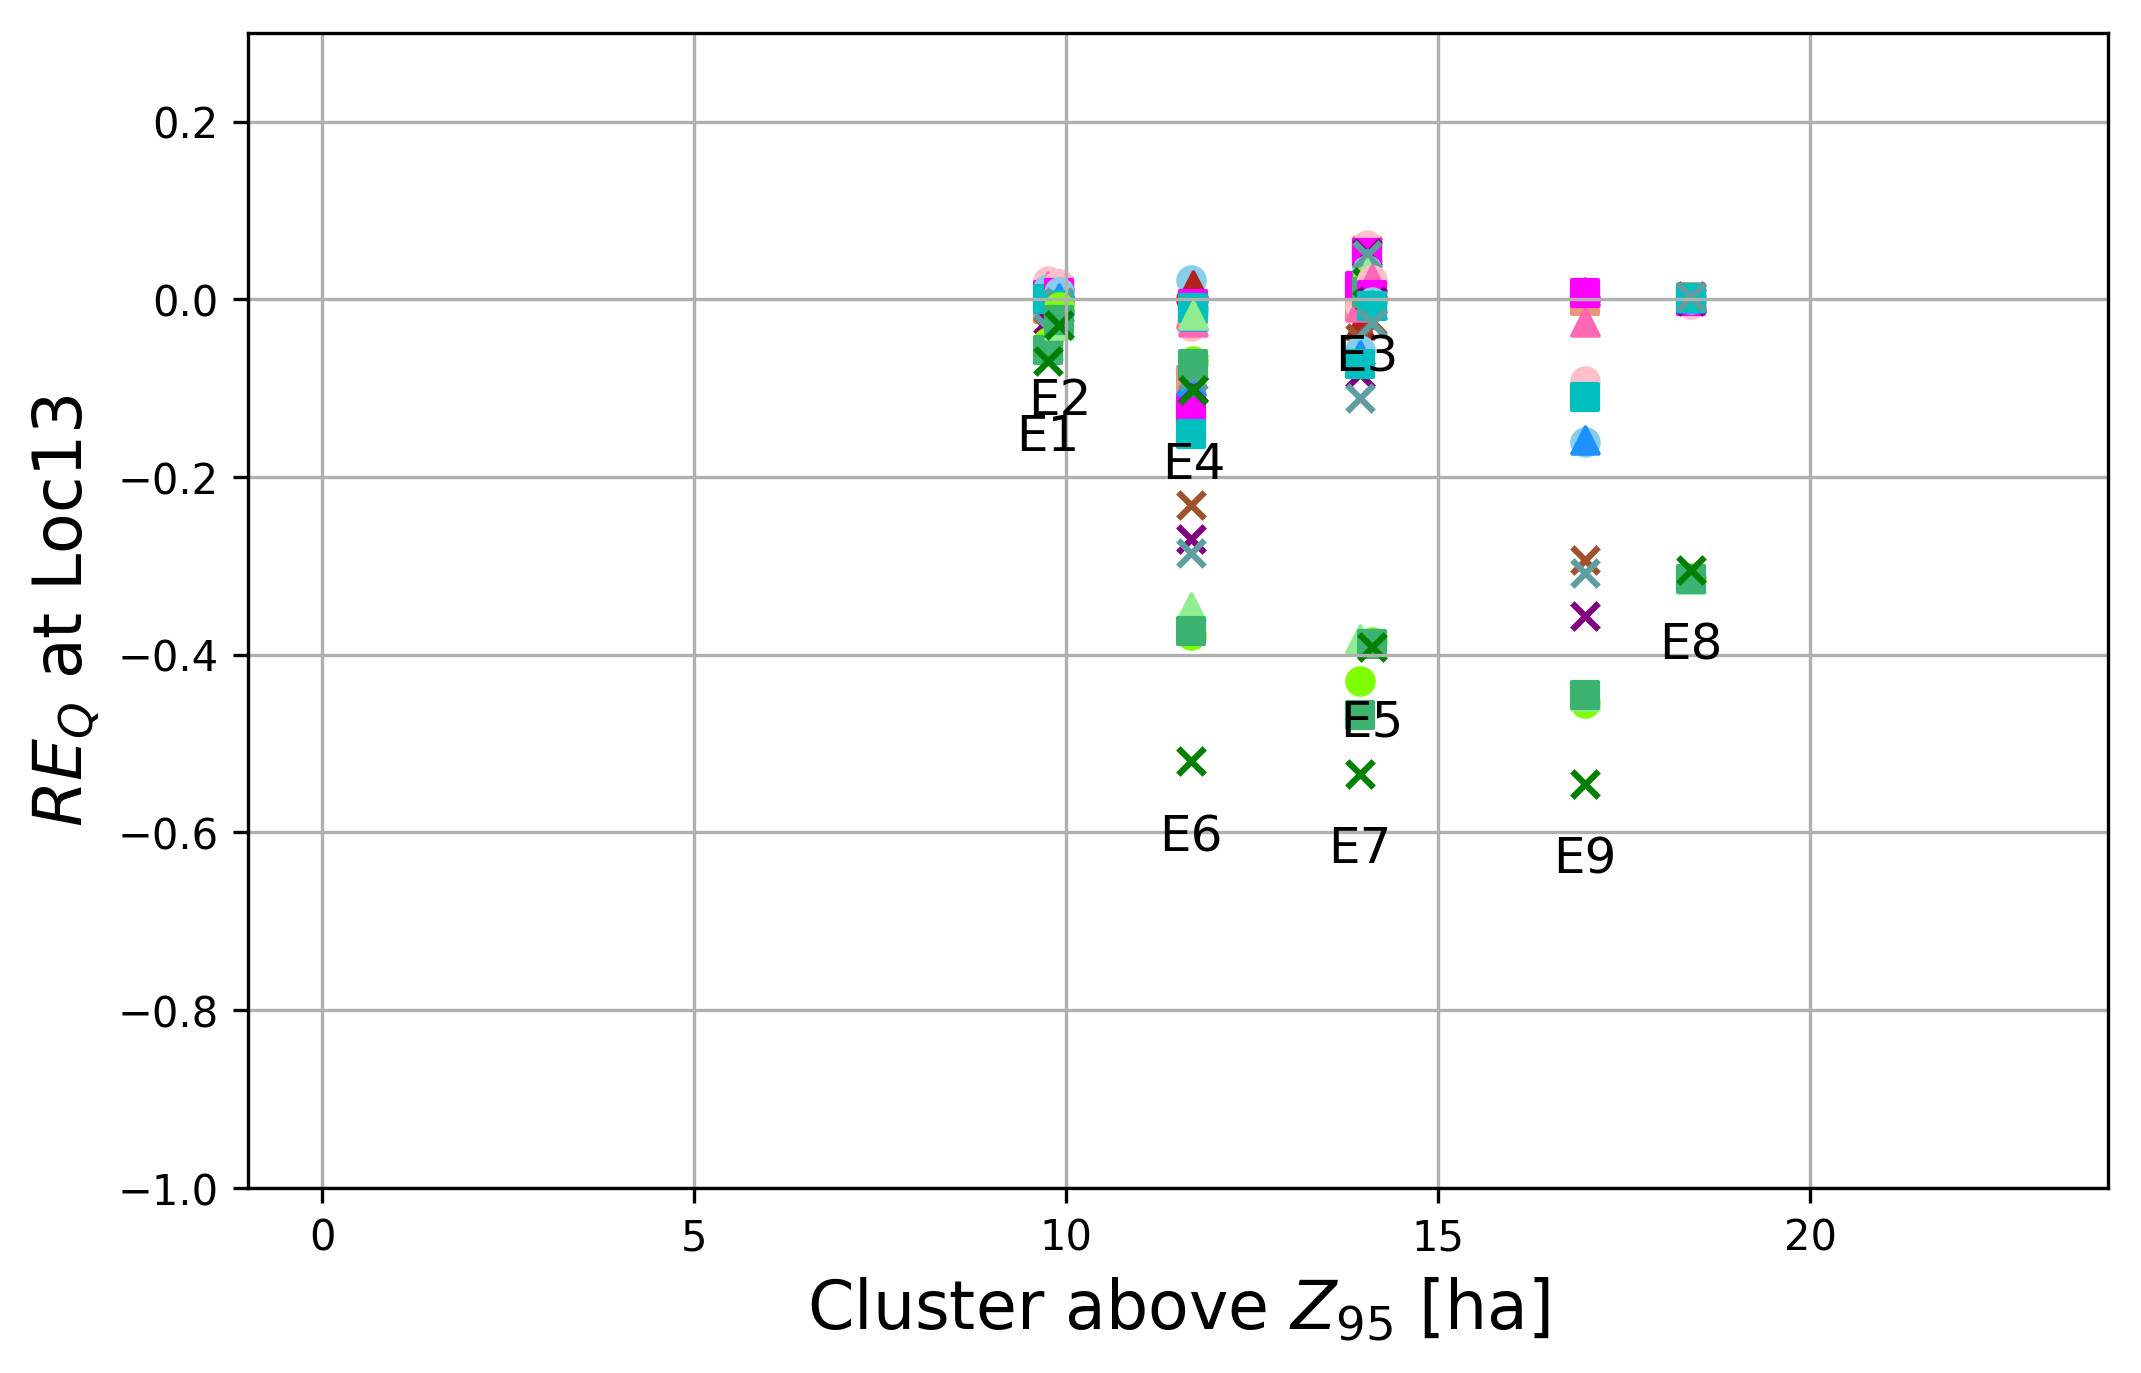

Supplement: Supplementary file 1 [file hess-22-2425-2018-supplement.zip › Order/RE_S22_loc13.png]

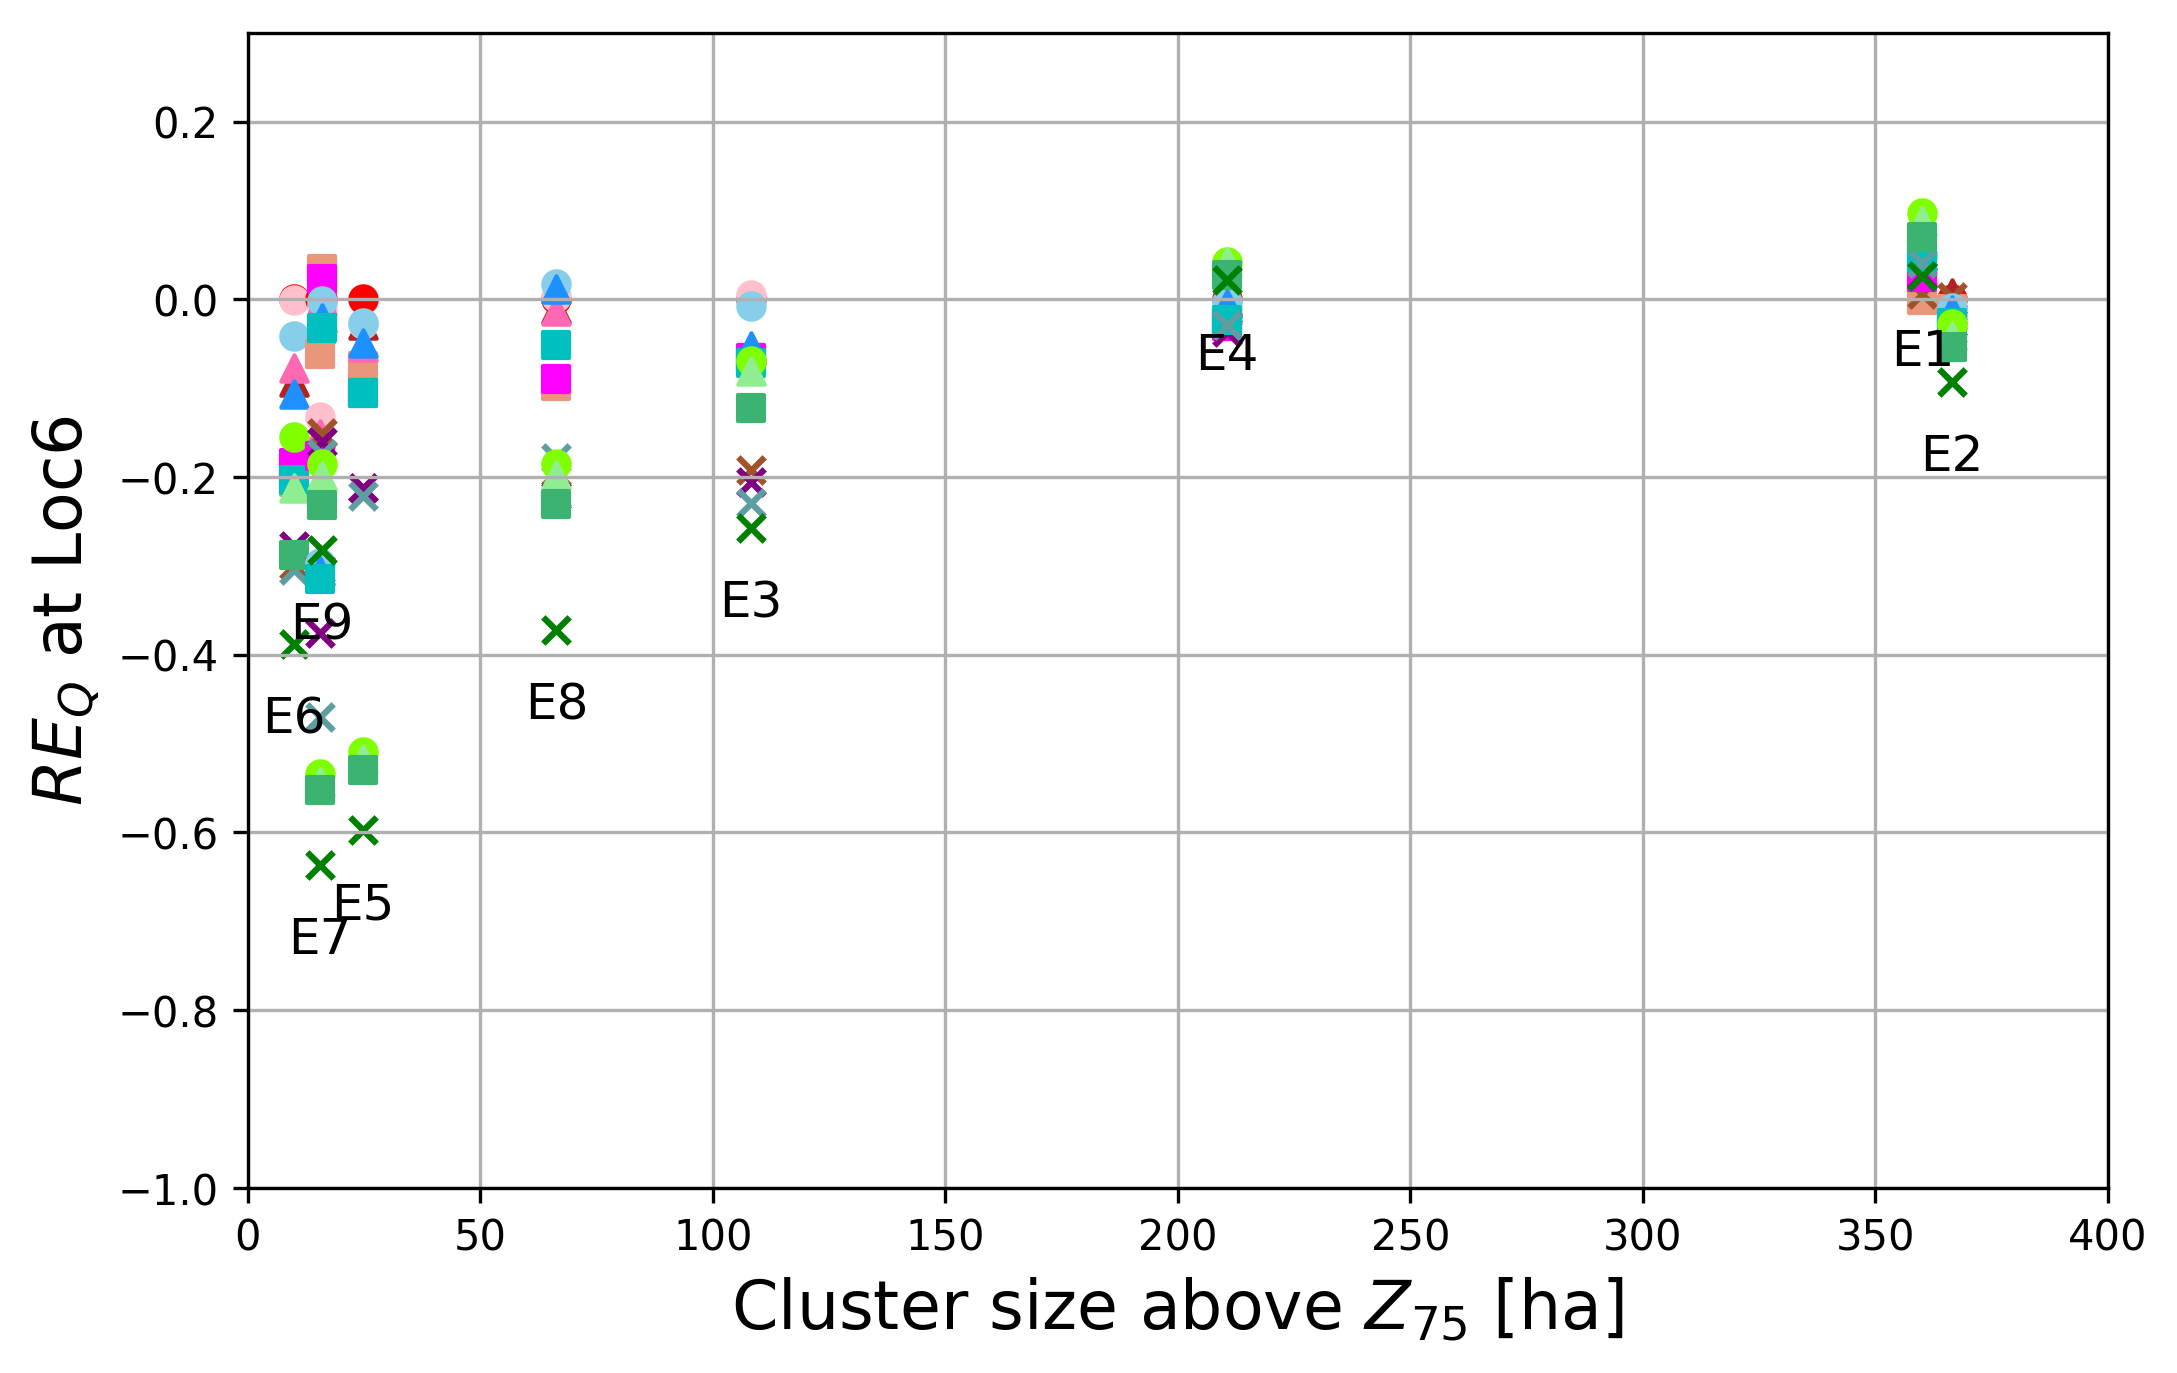

Supplement: Supplementary file 1 [file hess-22-2425-2018-supplement.zip › Order/RE_S7_loc6.png]

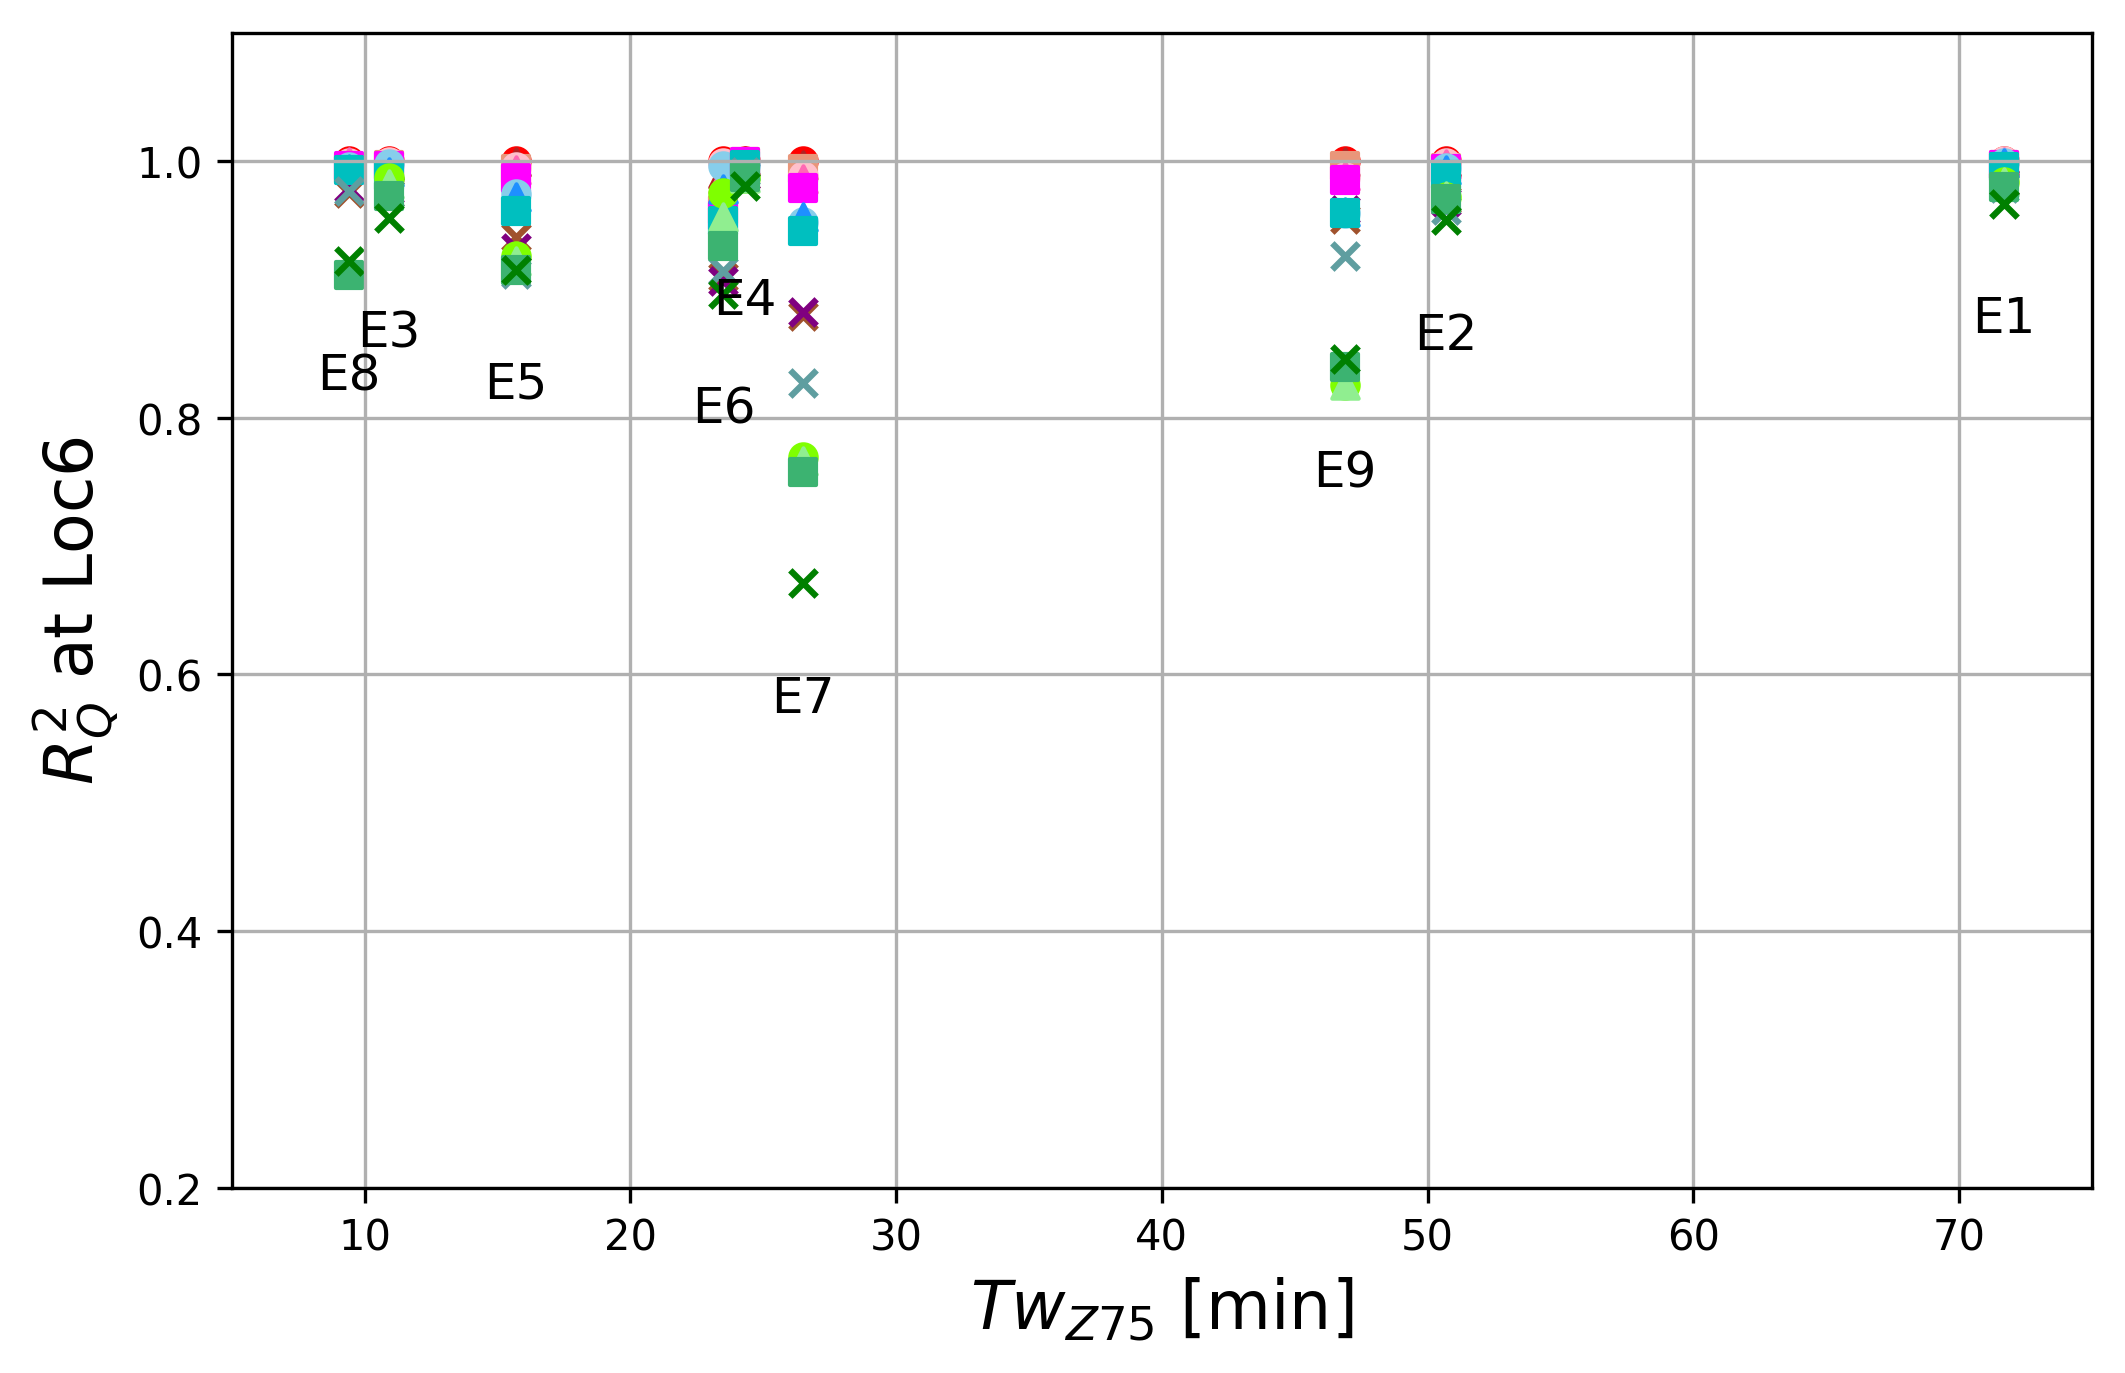

Supplement: Supplementary file 1 [file hess-22-2425-2018-supplement.zip › Order/R2_T7plus_loc6.png]

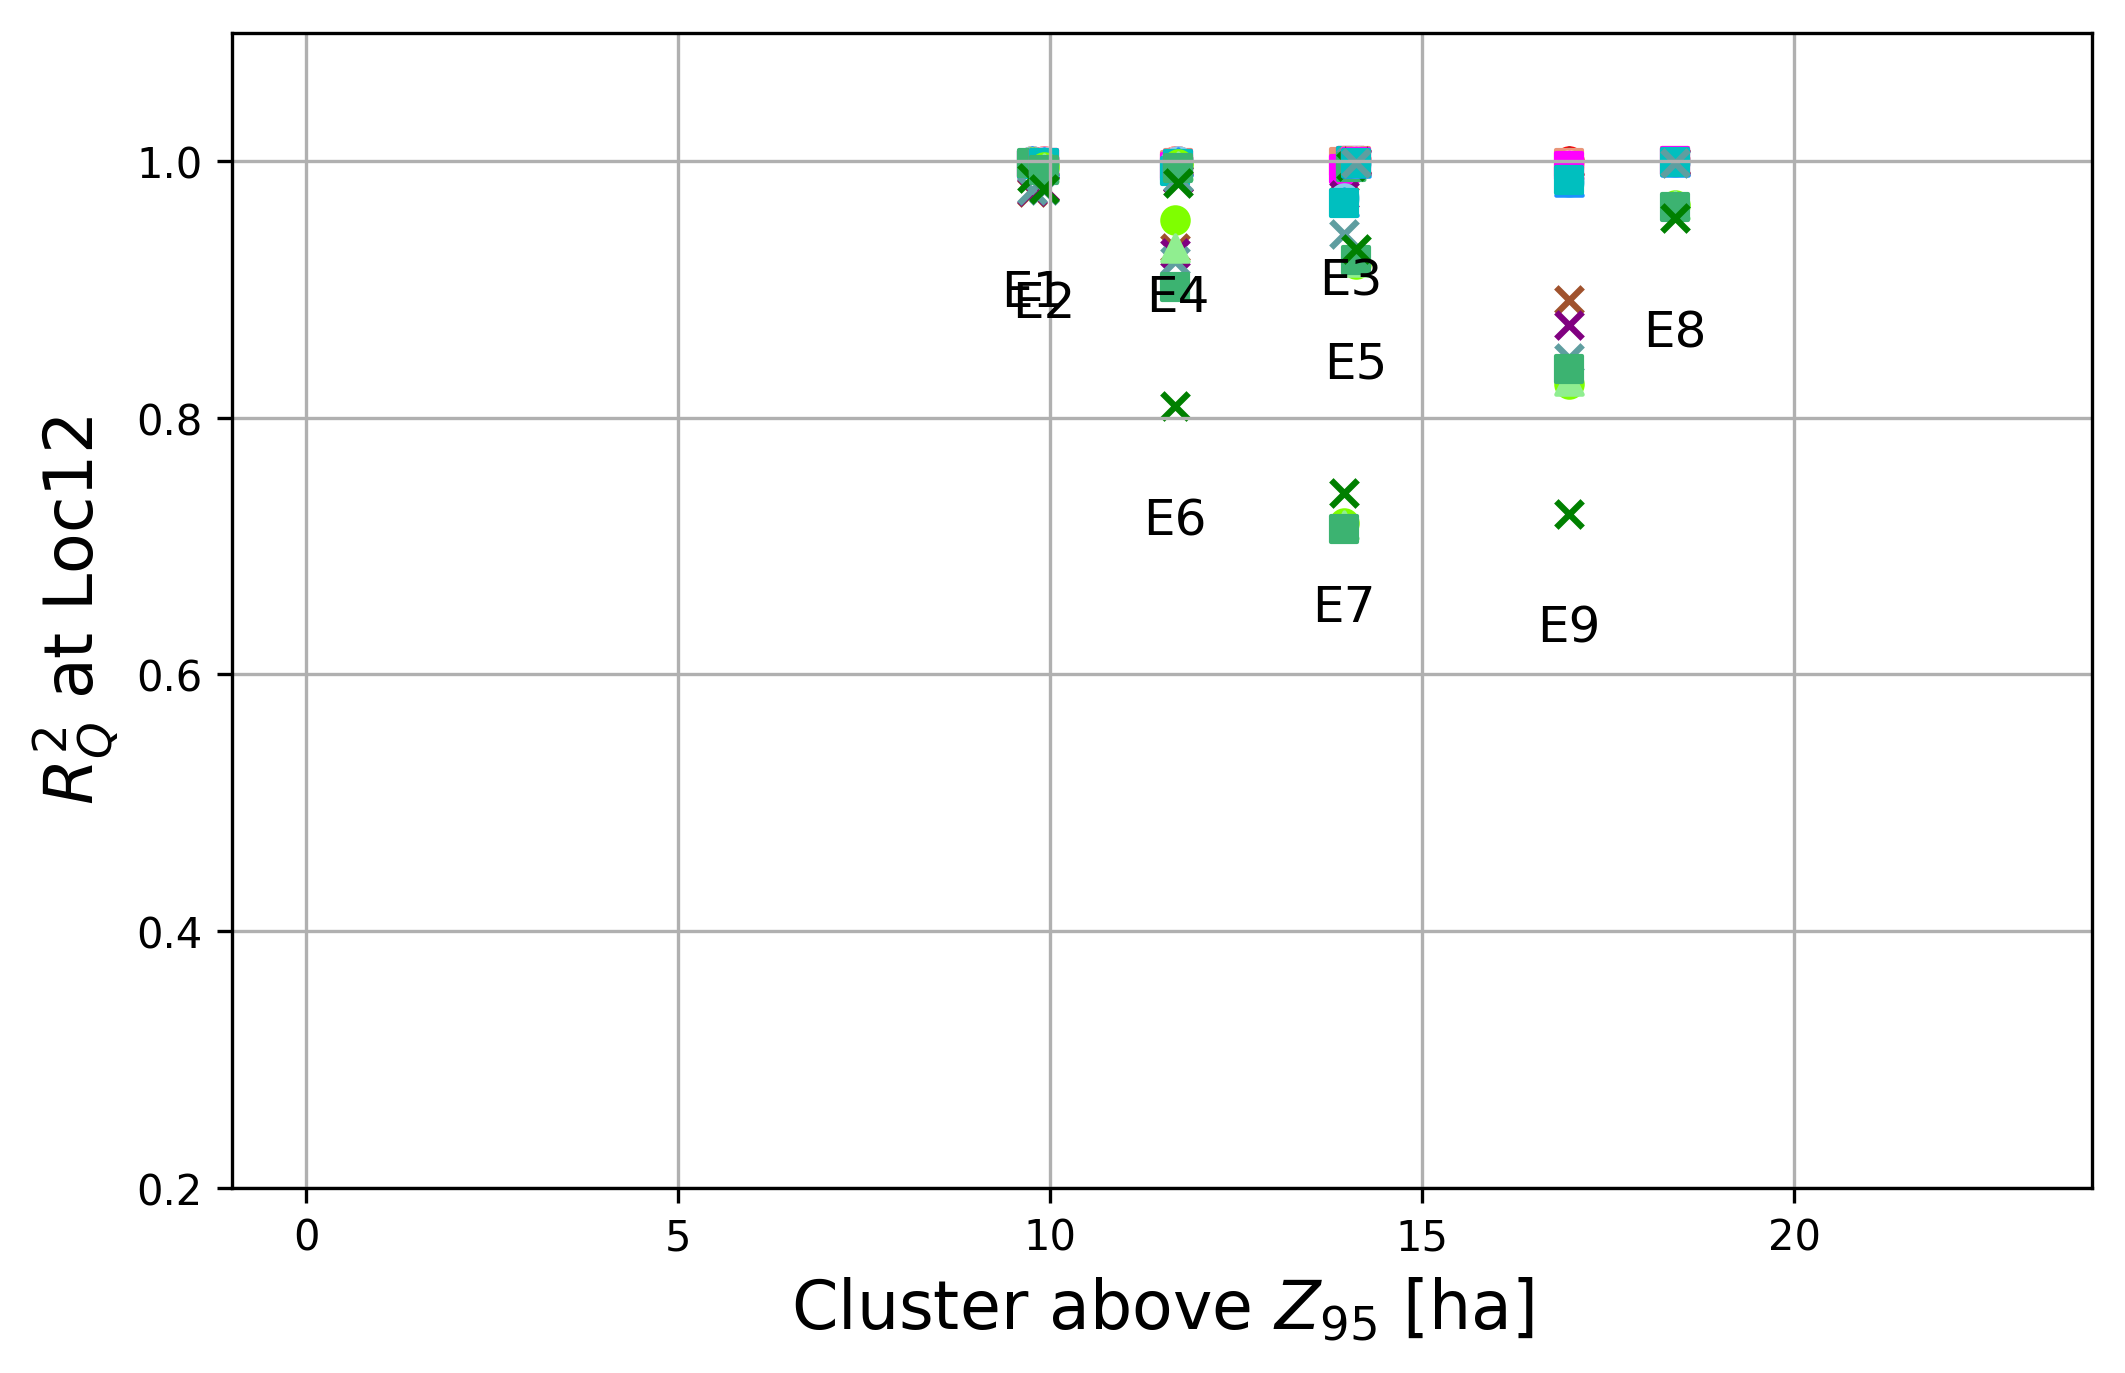

Supplement: Supplementary file 1 [file hess-22-2425-2018-supplement.zip › Order/R2_S22_loc12.png]

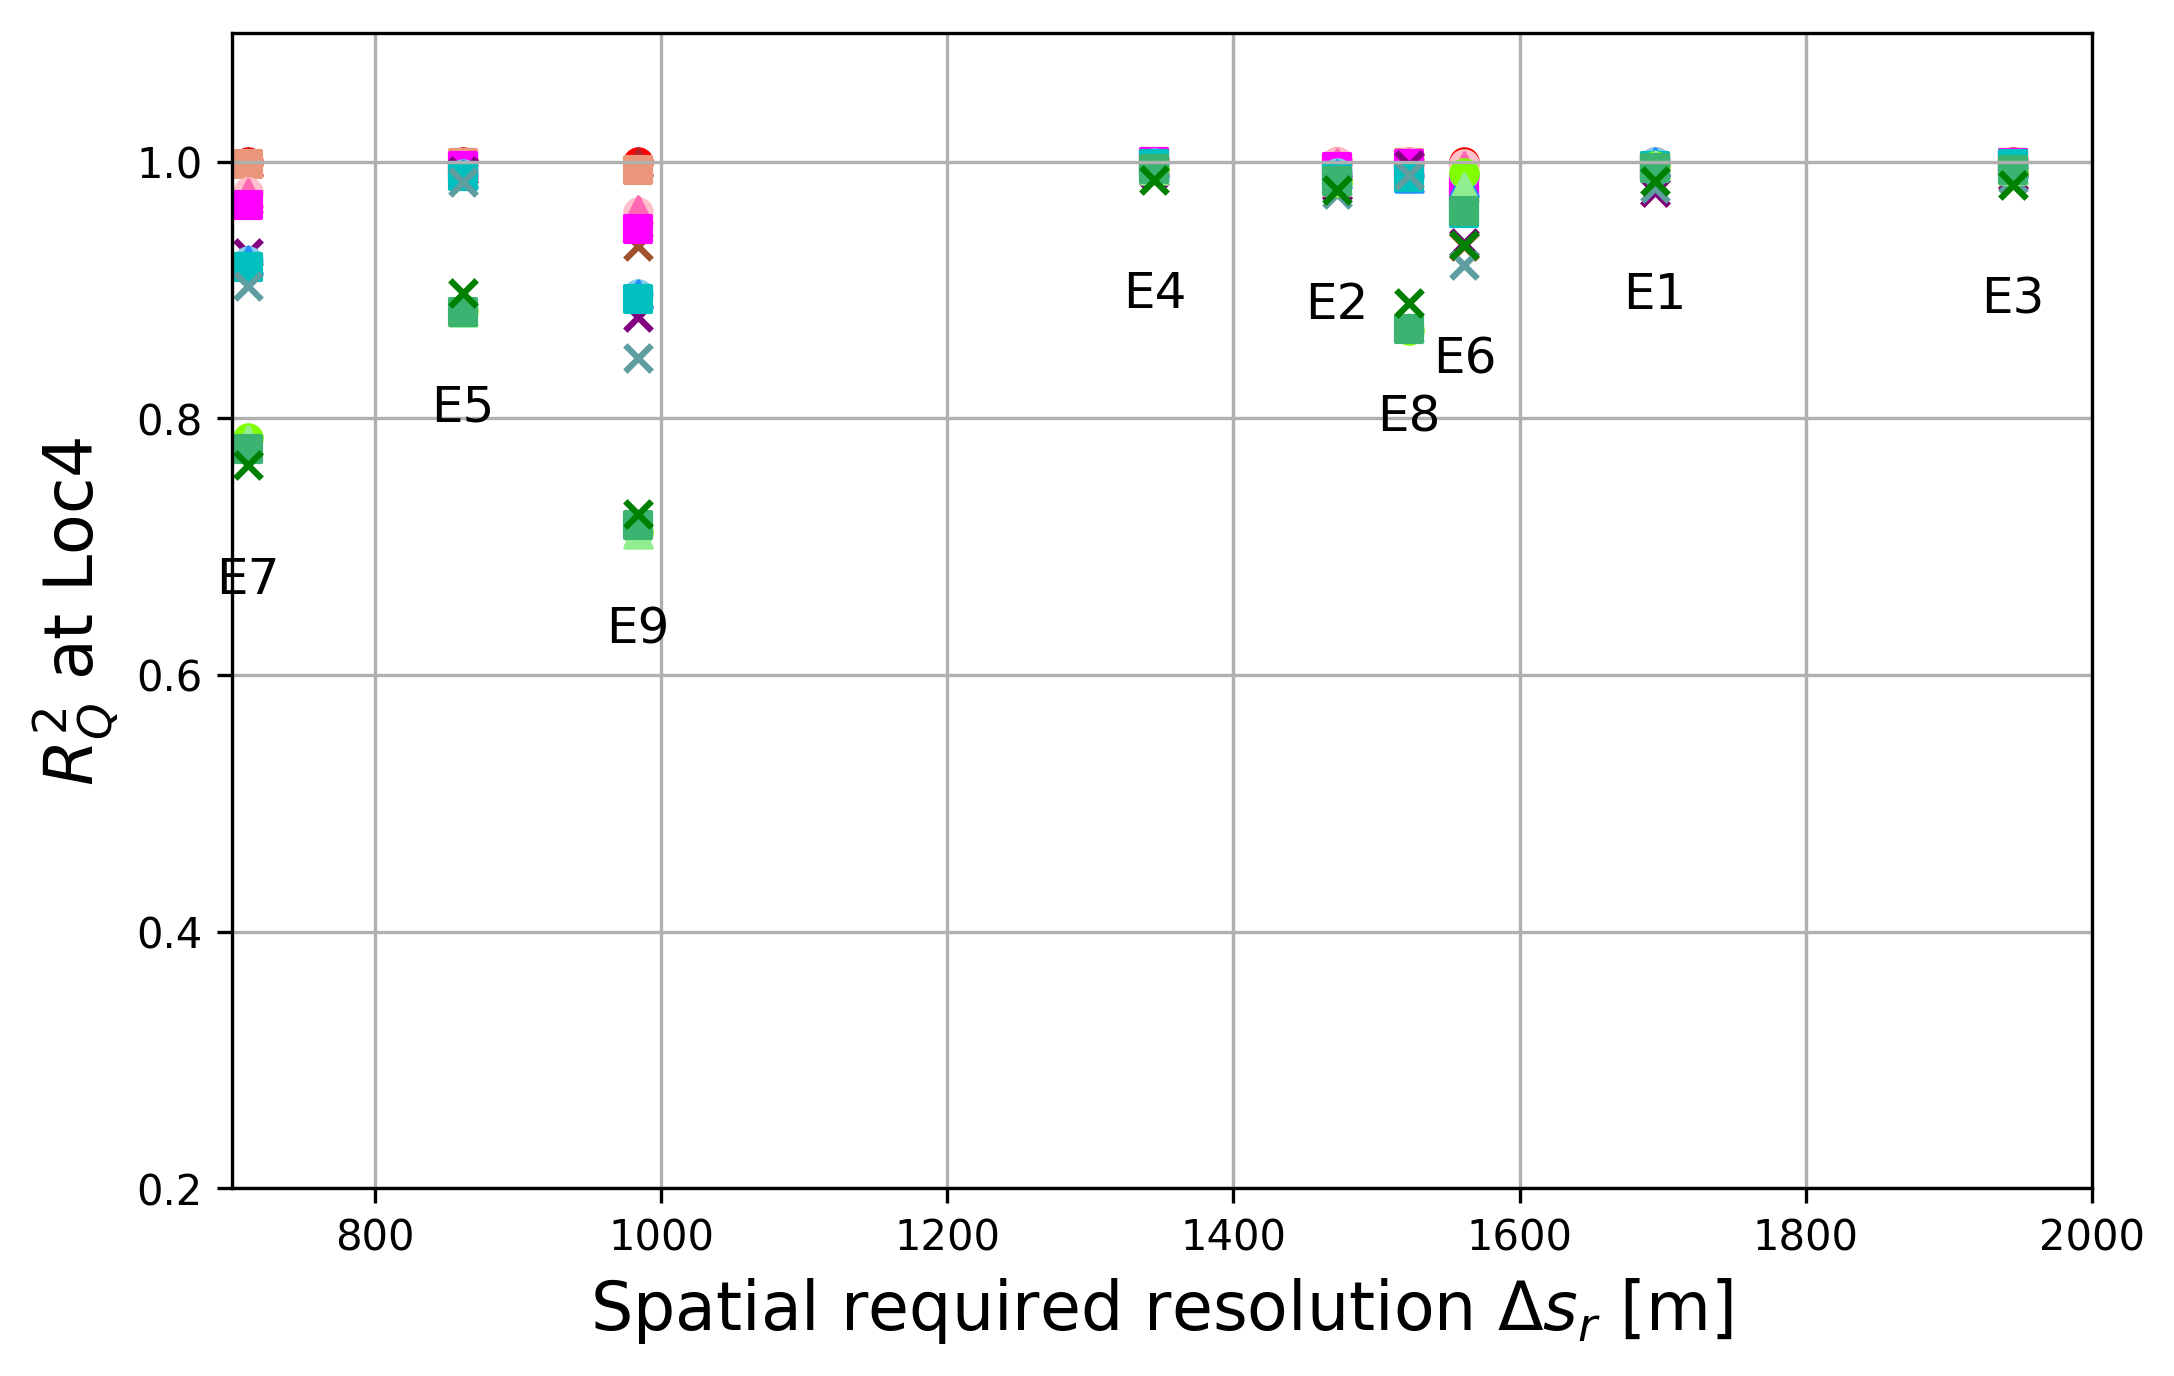

Supplement: Supplementary file 1 [file hess-22-2425-2018-supplement.zip › Order/R2_OchoaS_loc4.png]

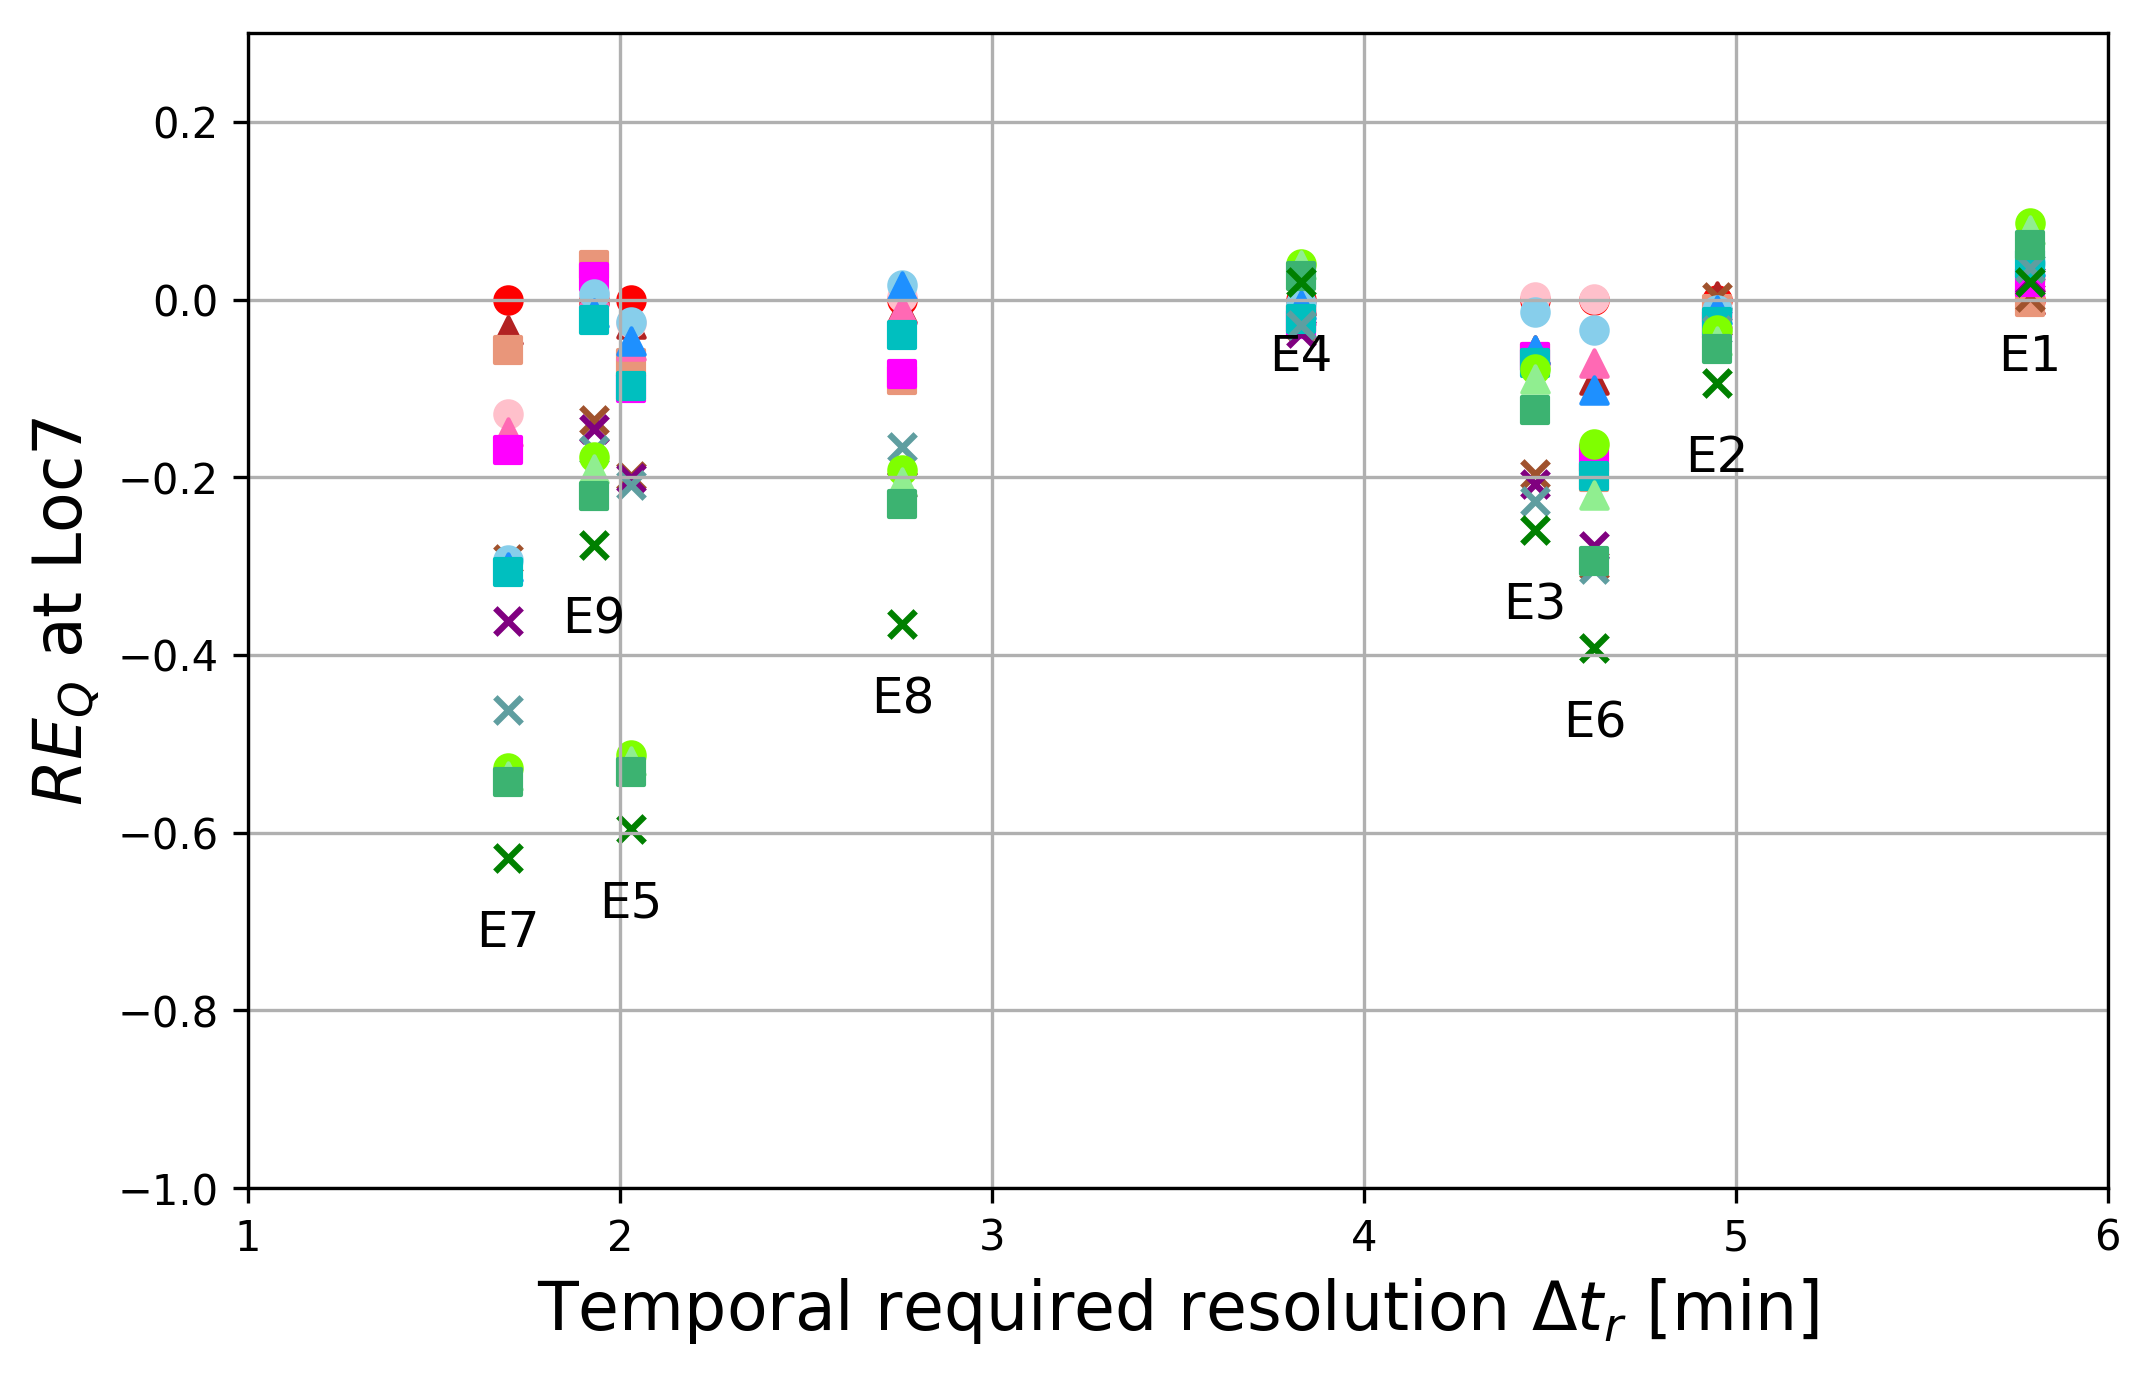

Supplement: Supplementary file 1 [file hess-22-2425-2018-supplement.zip › Order/RE_OchoaT_loc7.png]

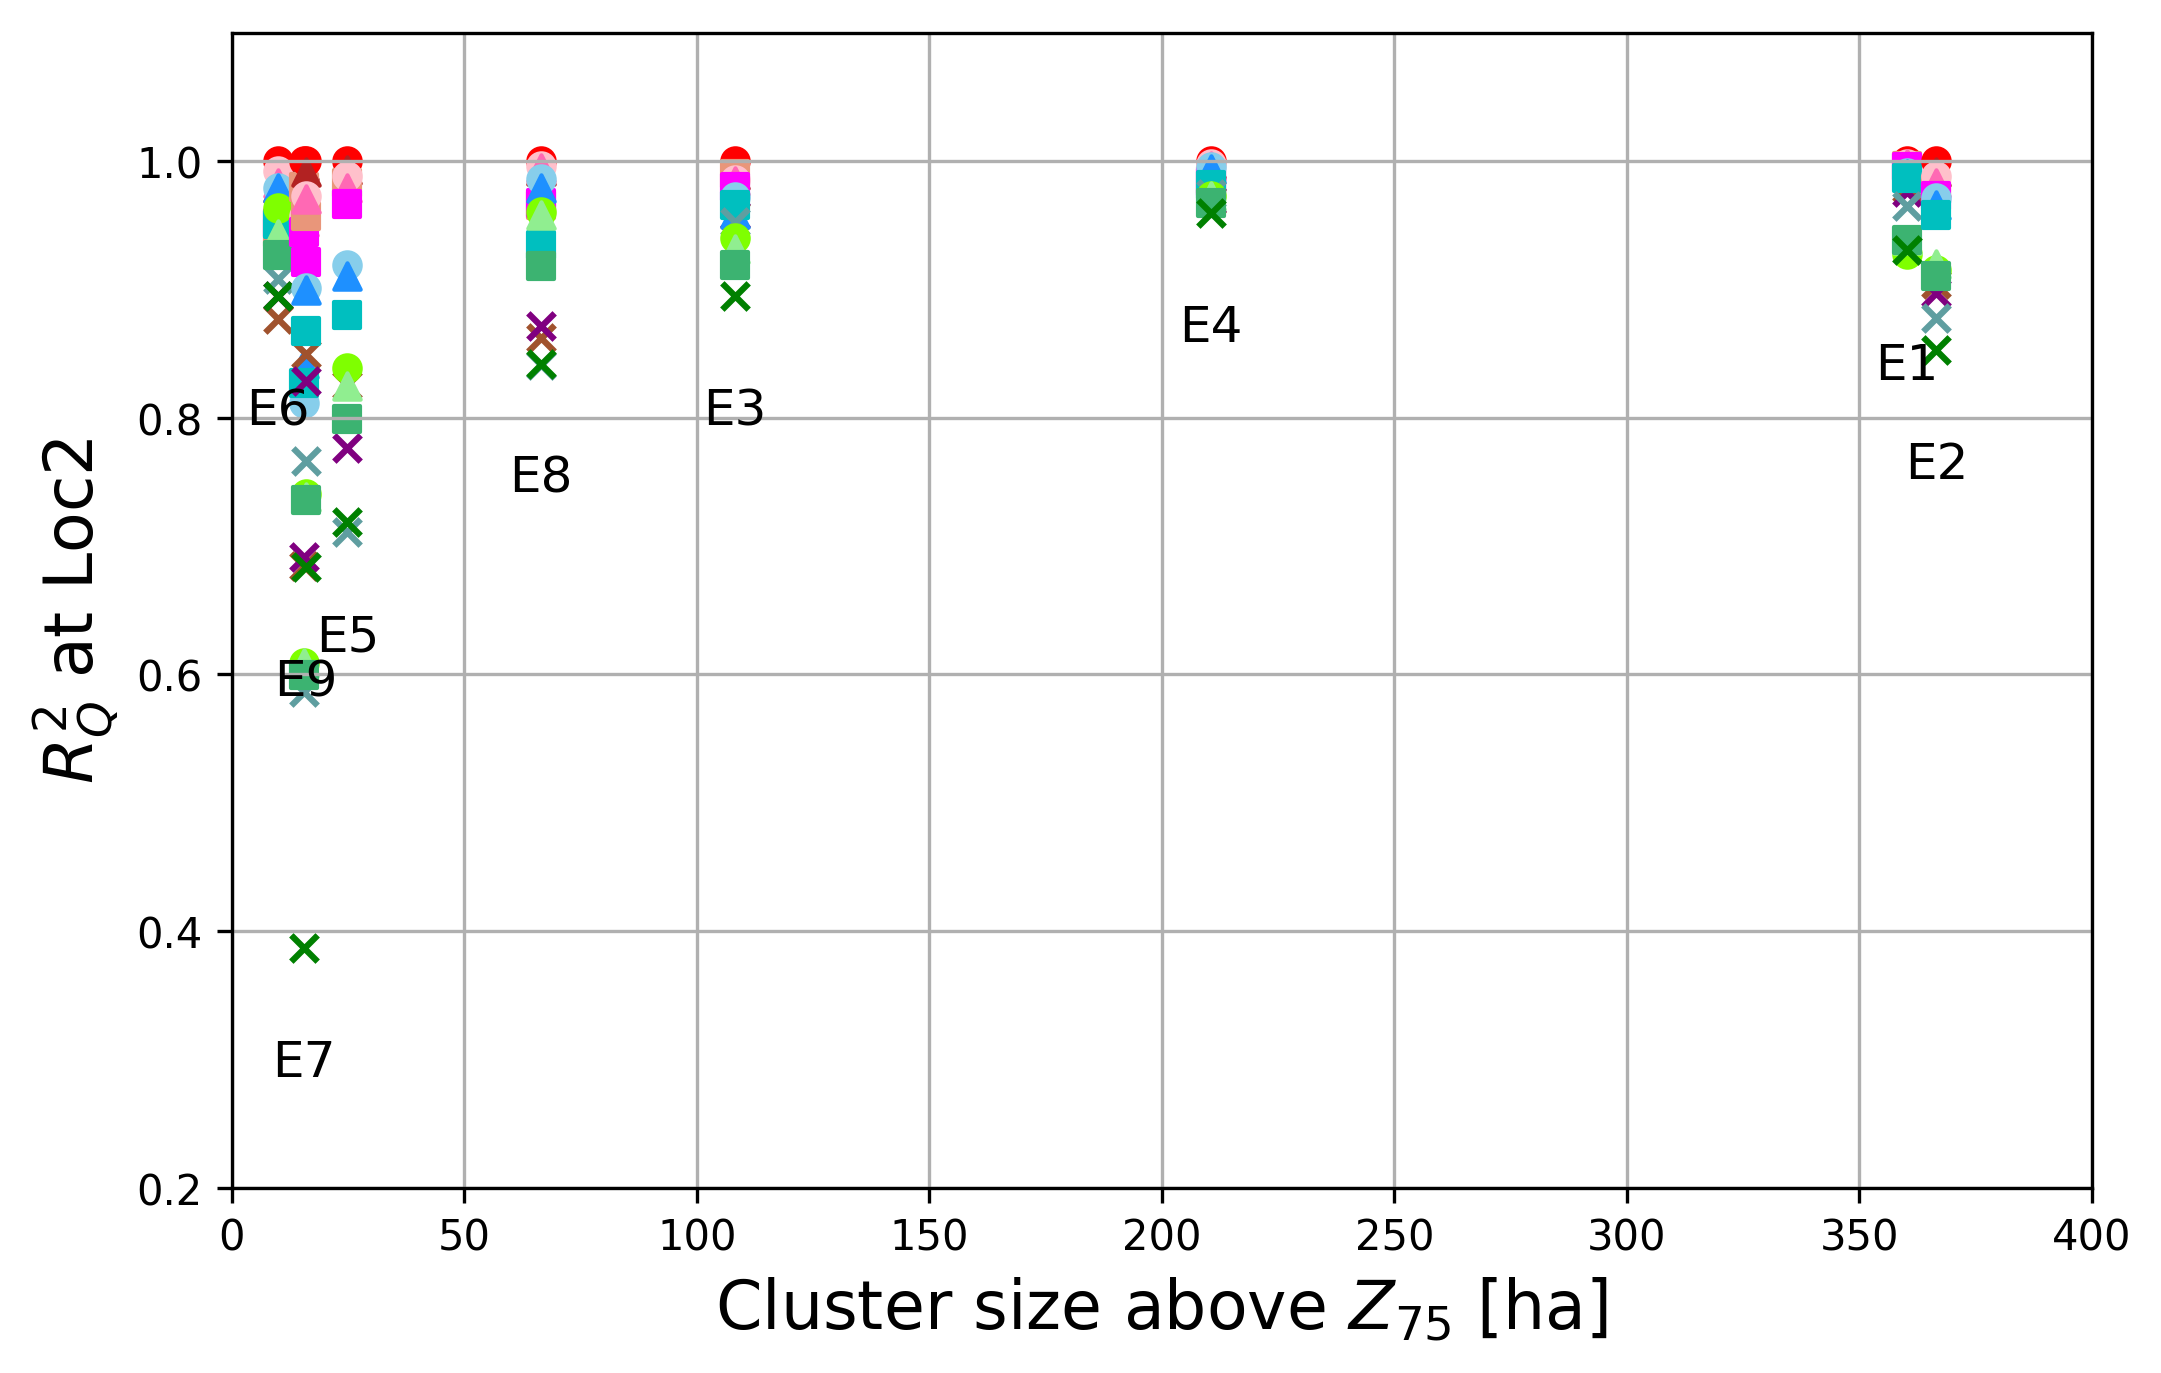

Supplement: Supplementary file 1 [file hess-22-2425-2018-supplement.zip › Order/R2_S7_loc2.png]

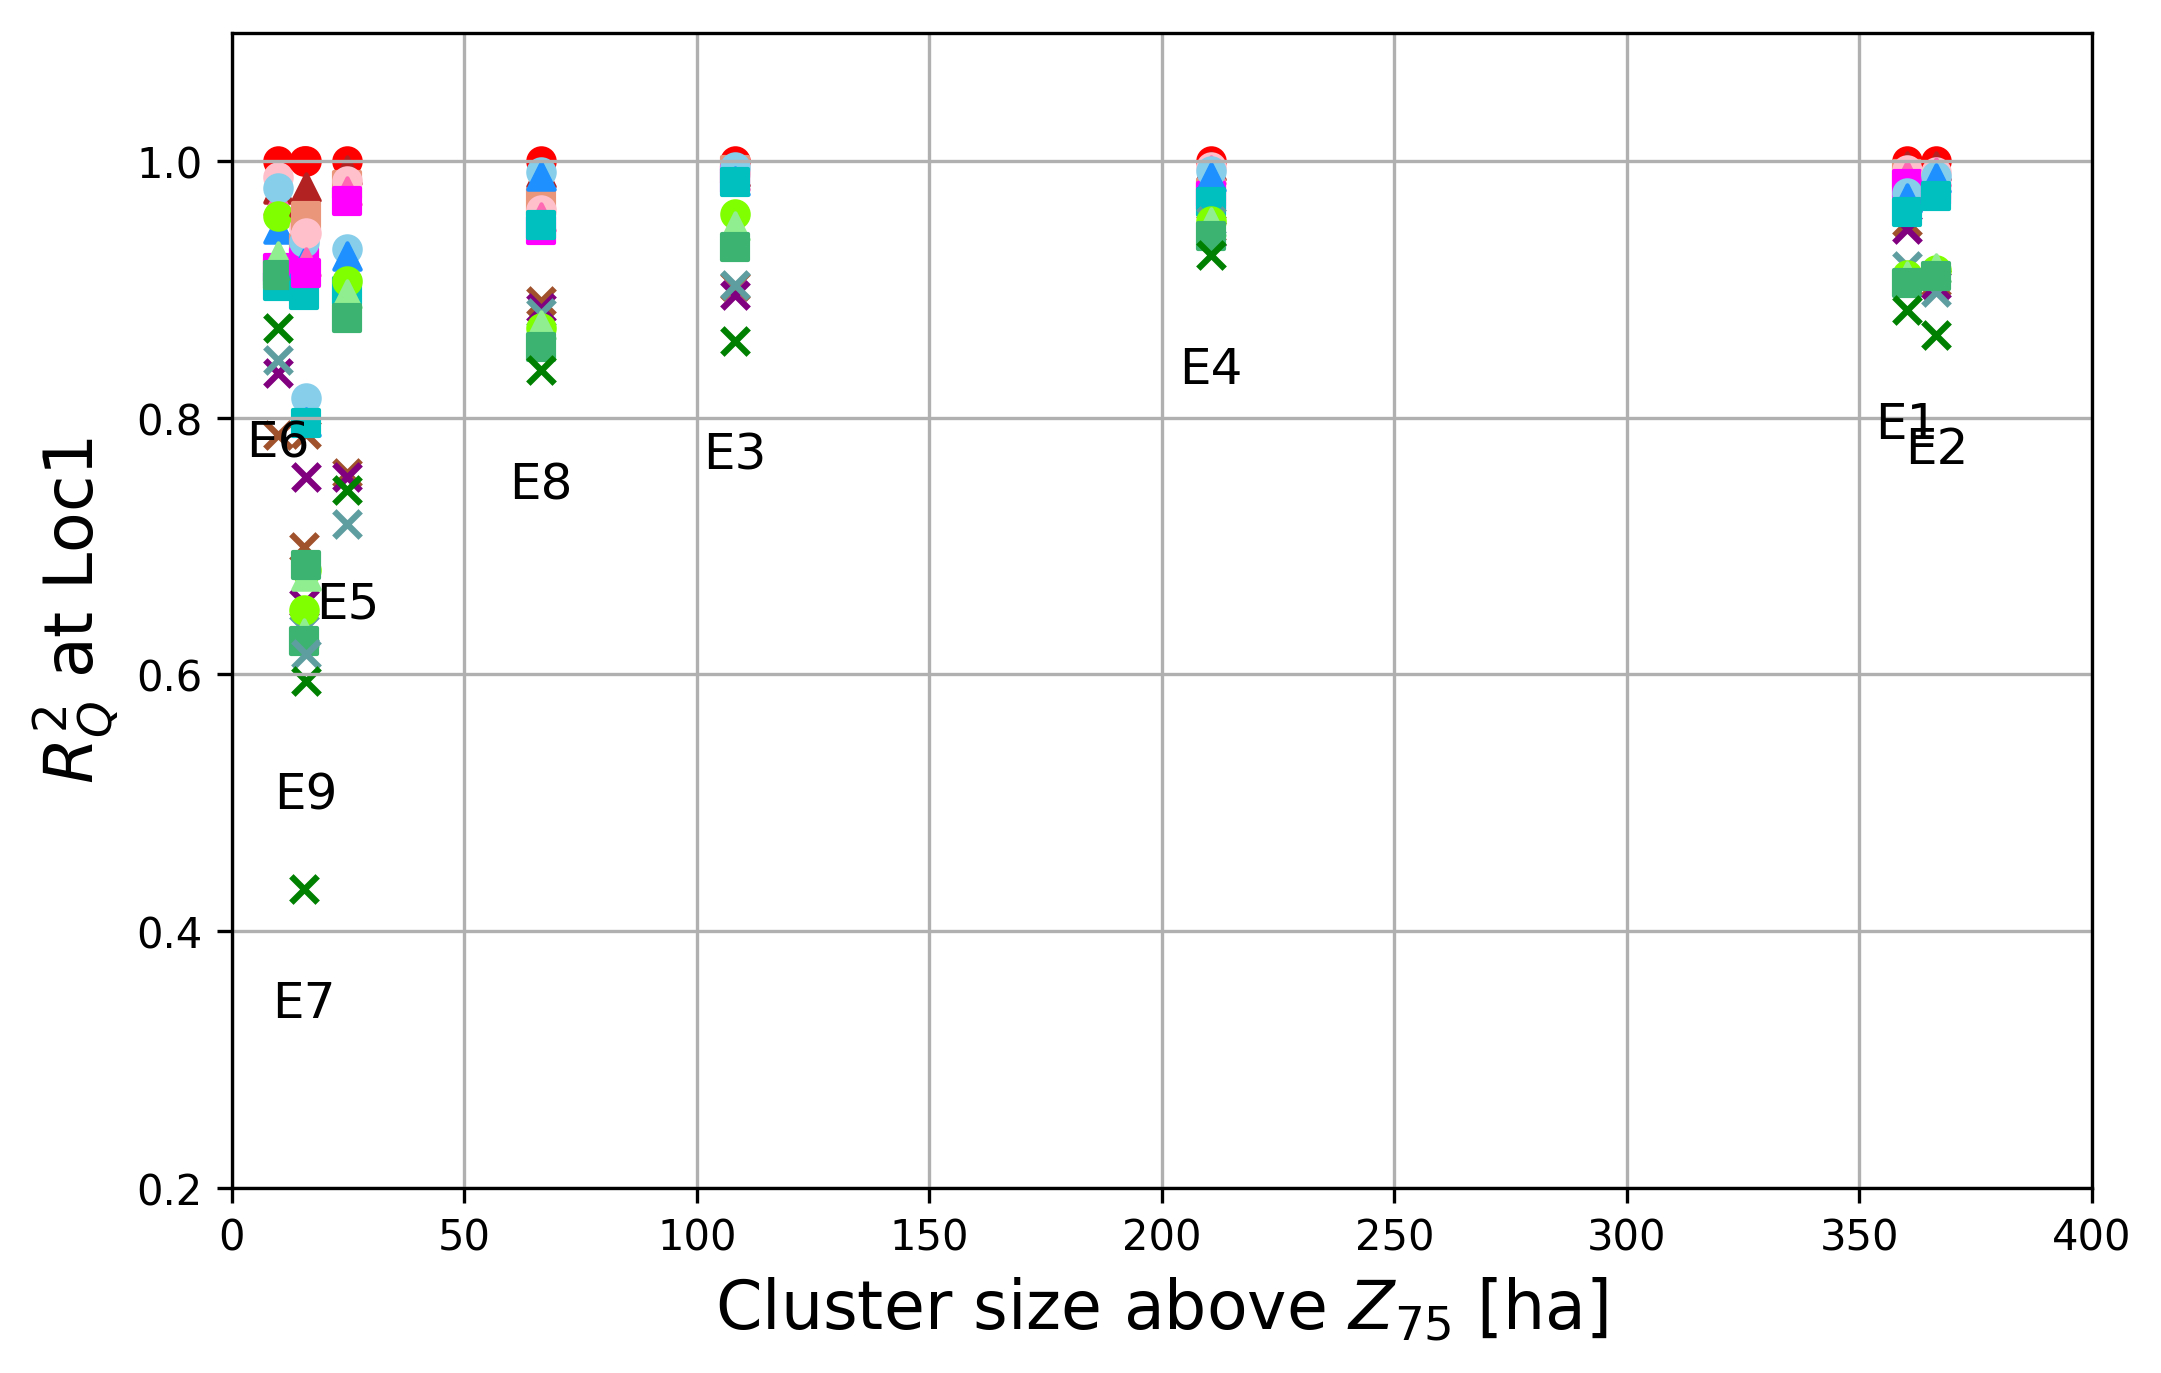

Supplement: Supplementary file 1 [file hess-22-2425-2018-supplement.zip › Order/R2_S7_loc1.png]

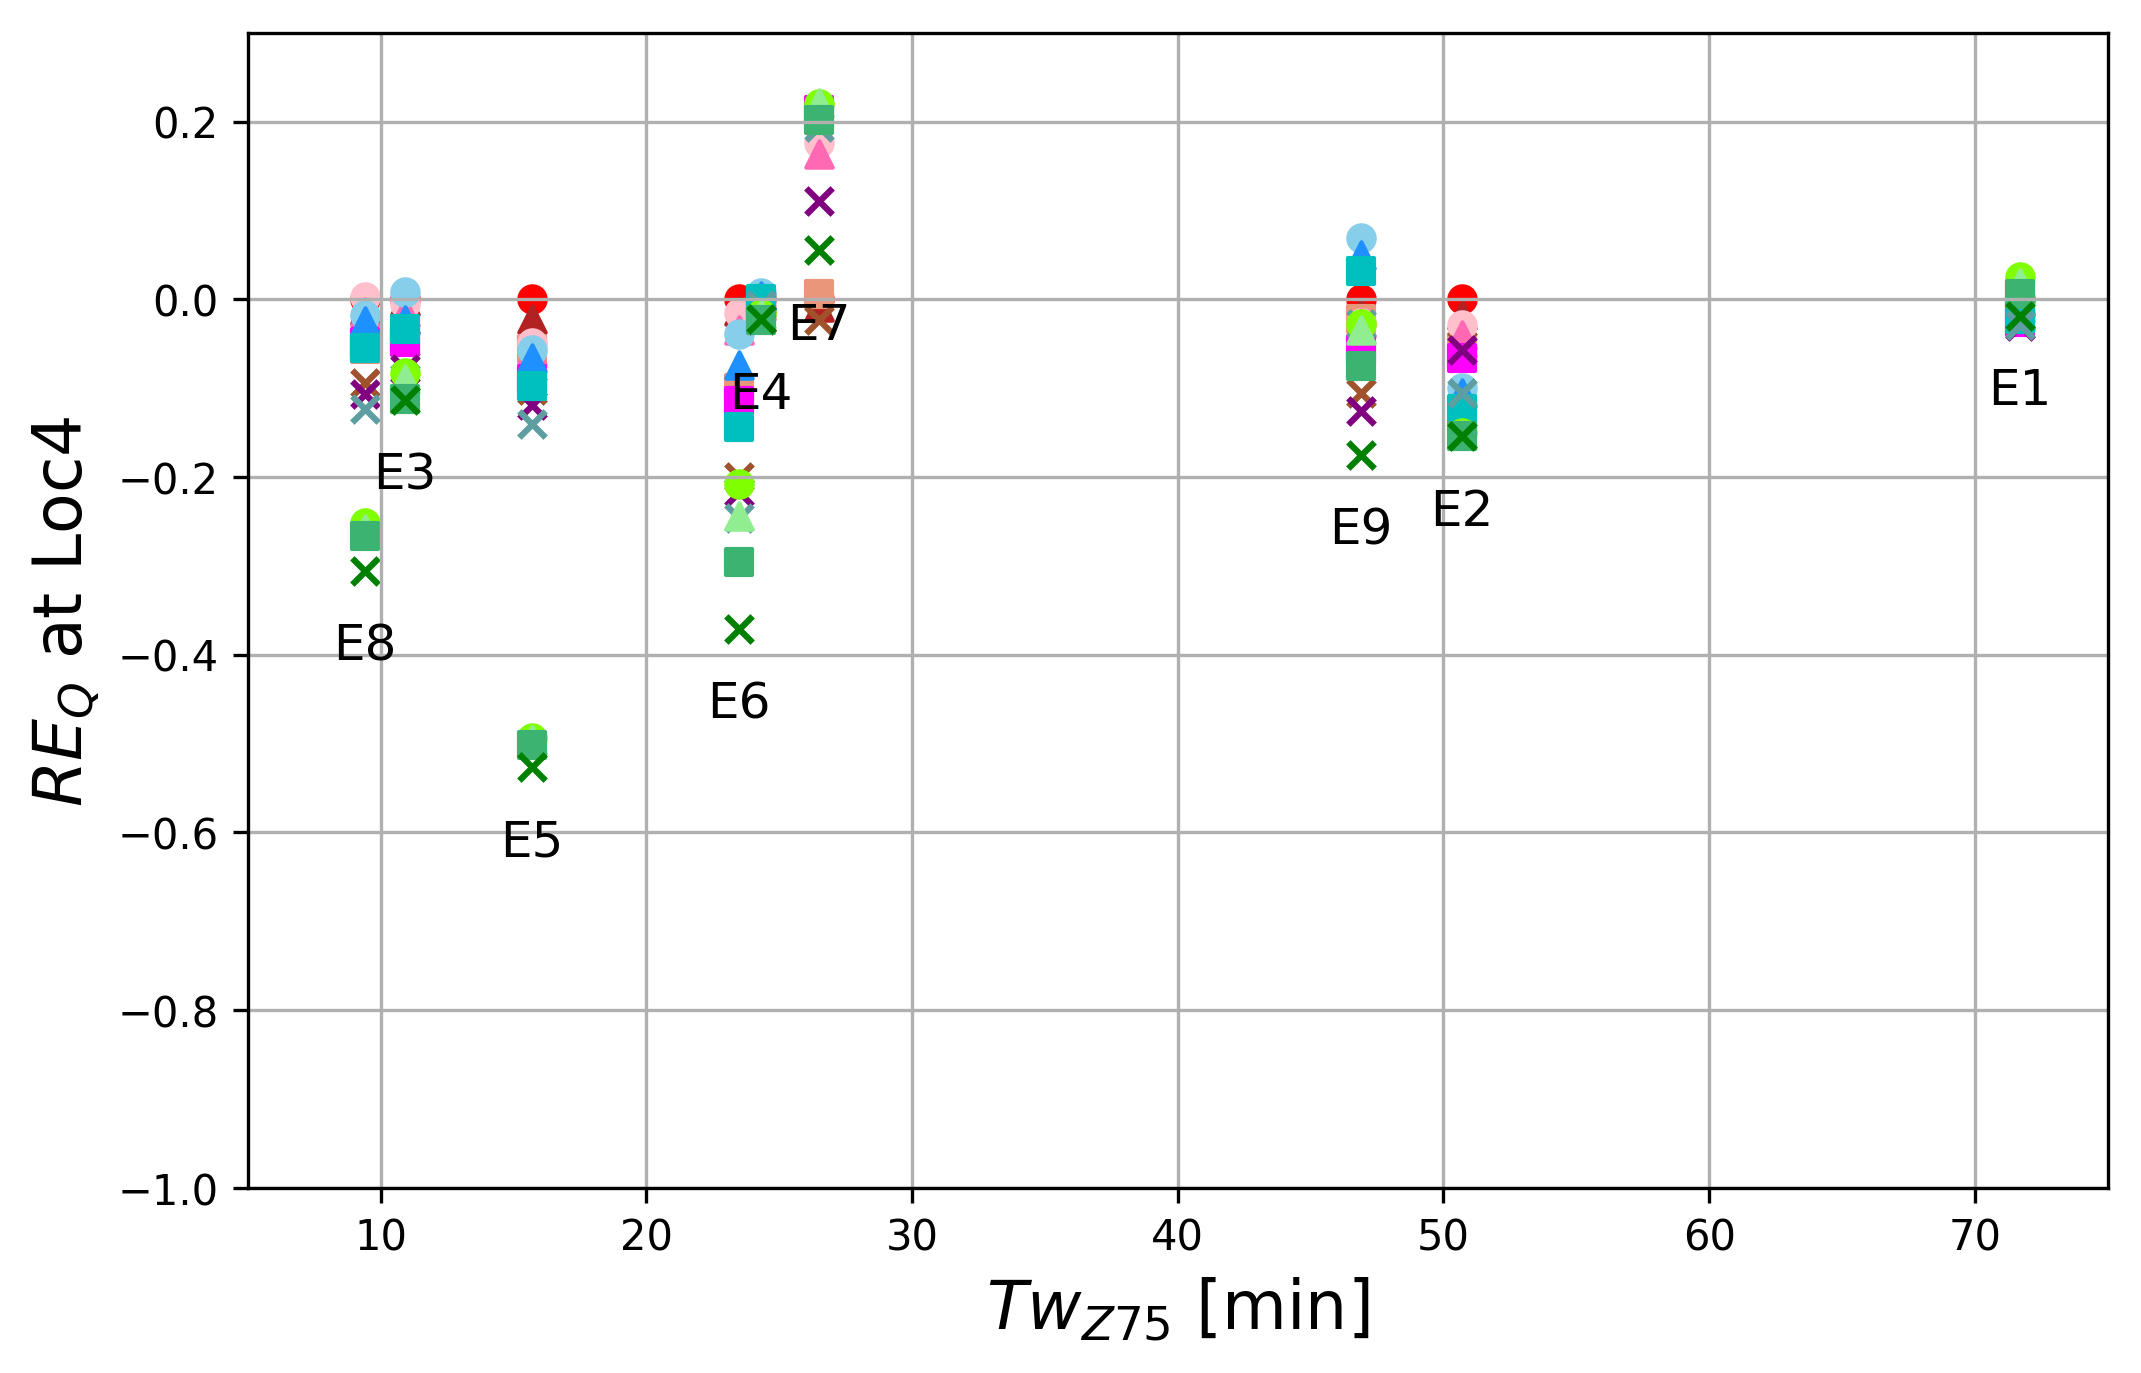

Supplement: Supplementary file 1 [file hess-22-2425-2018-supplement.zip › Order/RE_T7plus_loc4.png]

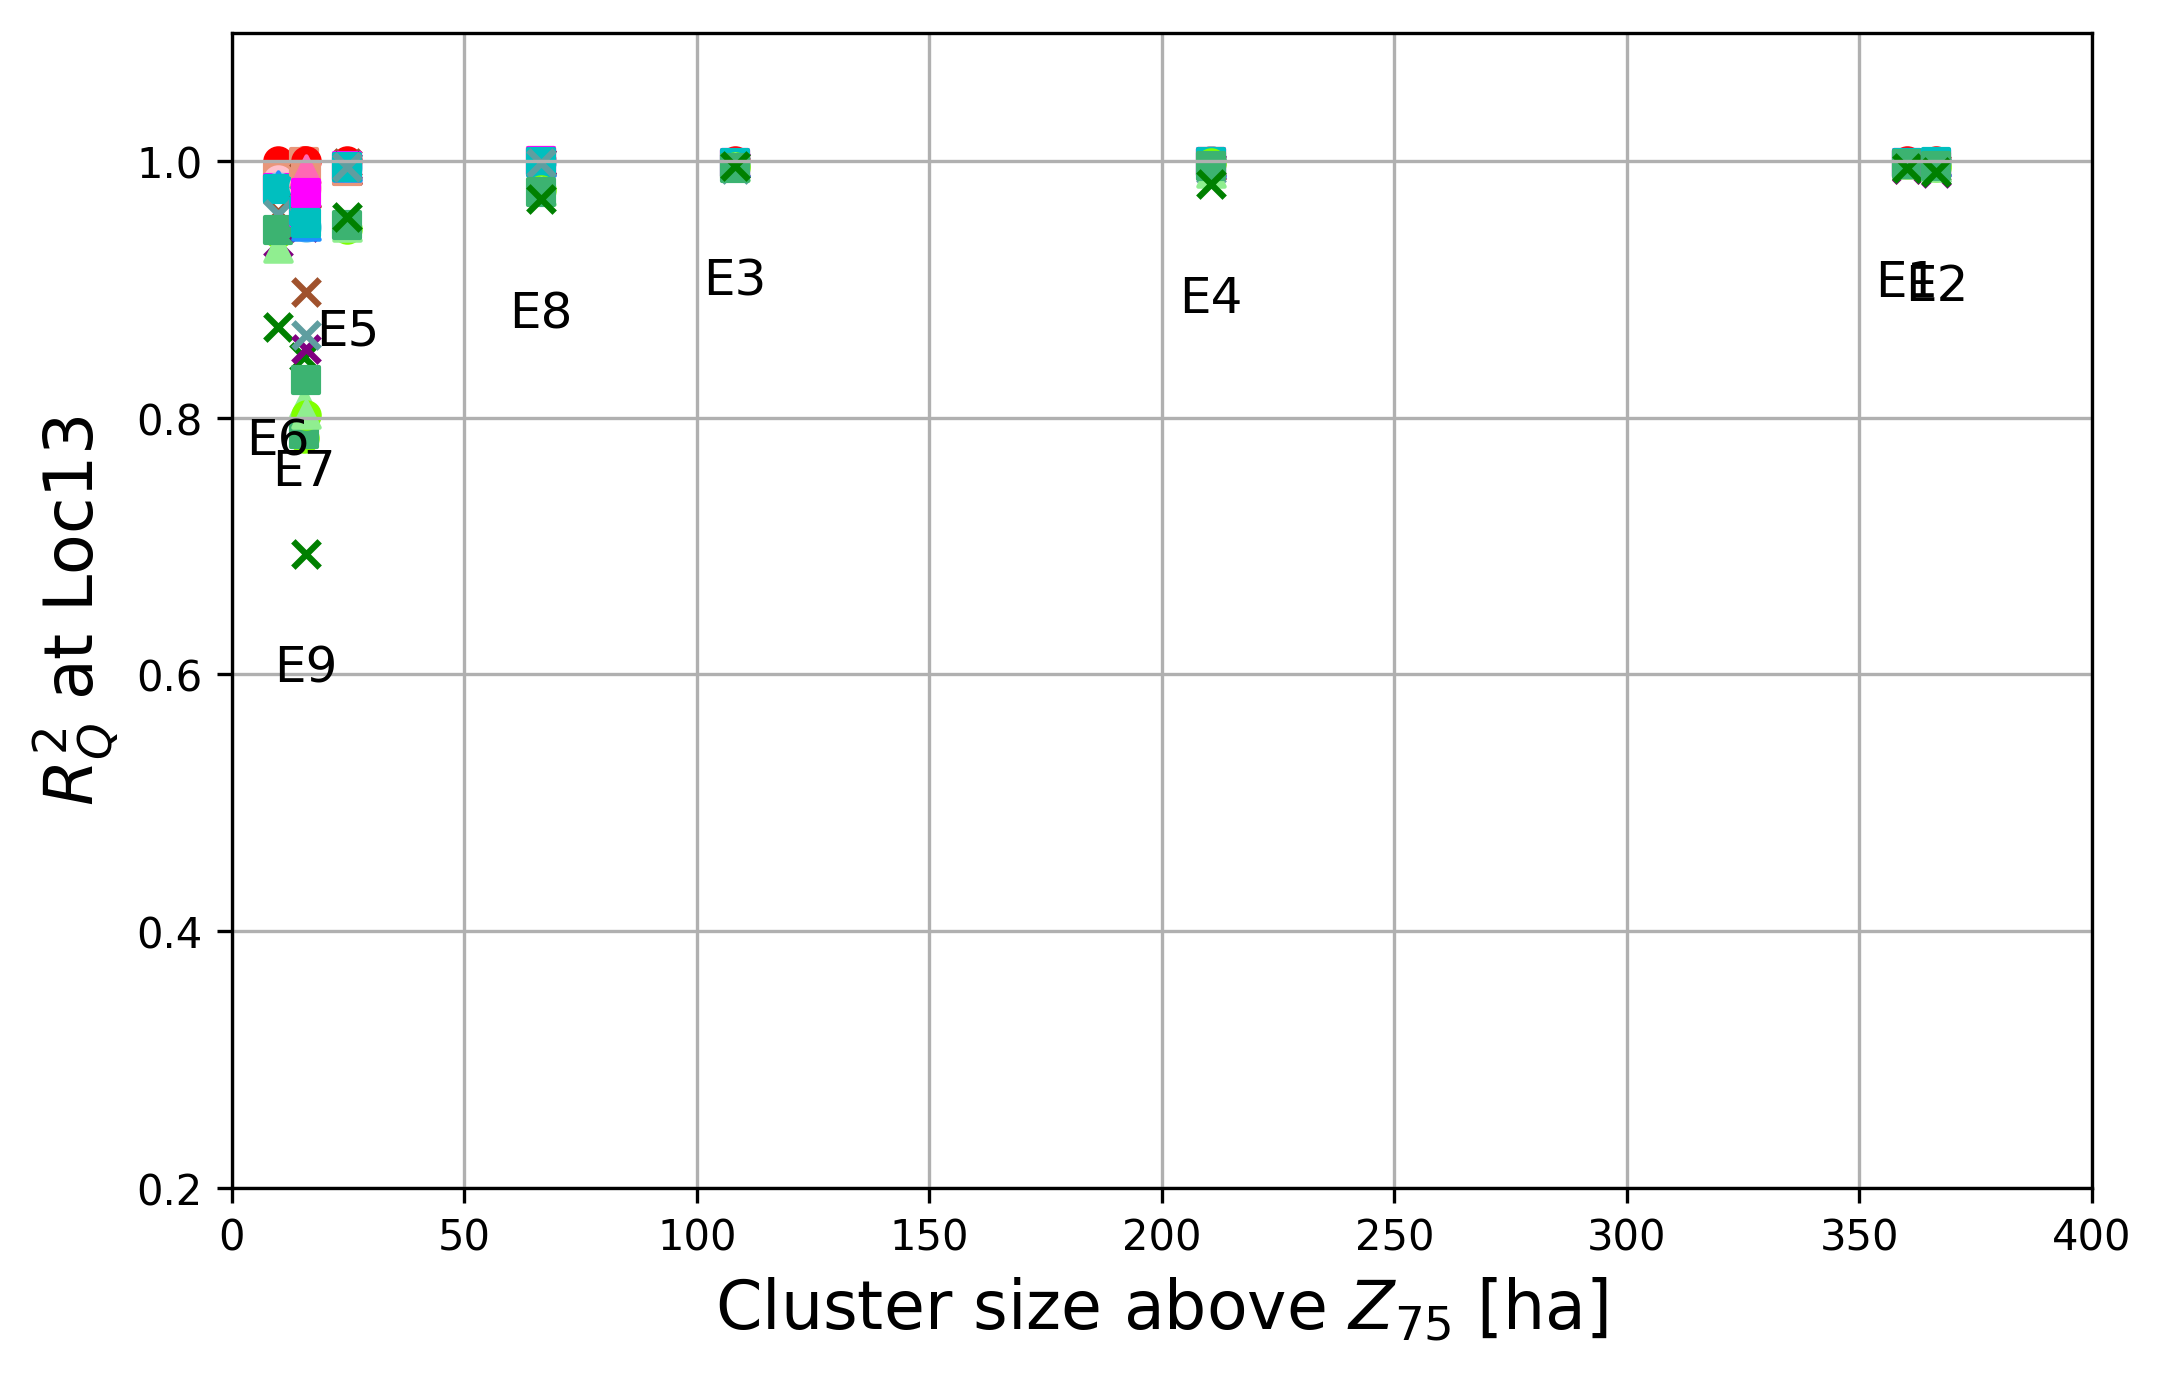

Supplement: Supplementary file 1 [file hess-22-2425-2018-supplement.zip › Order/R2_S7_loc13.png]

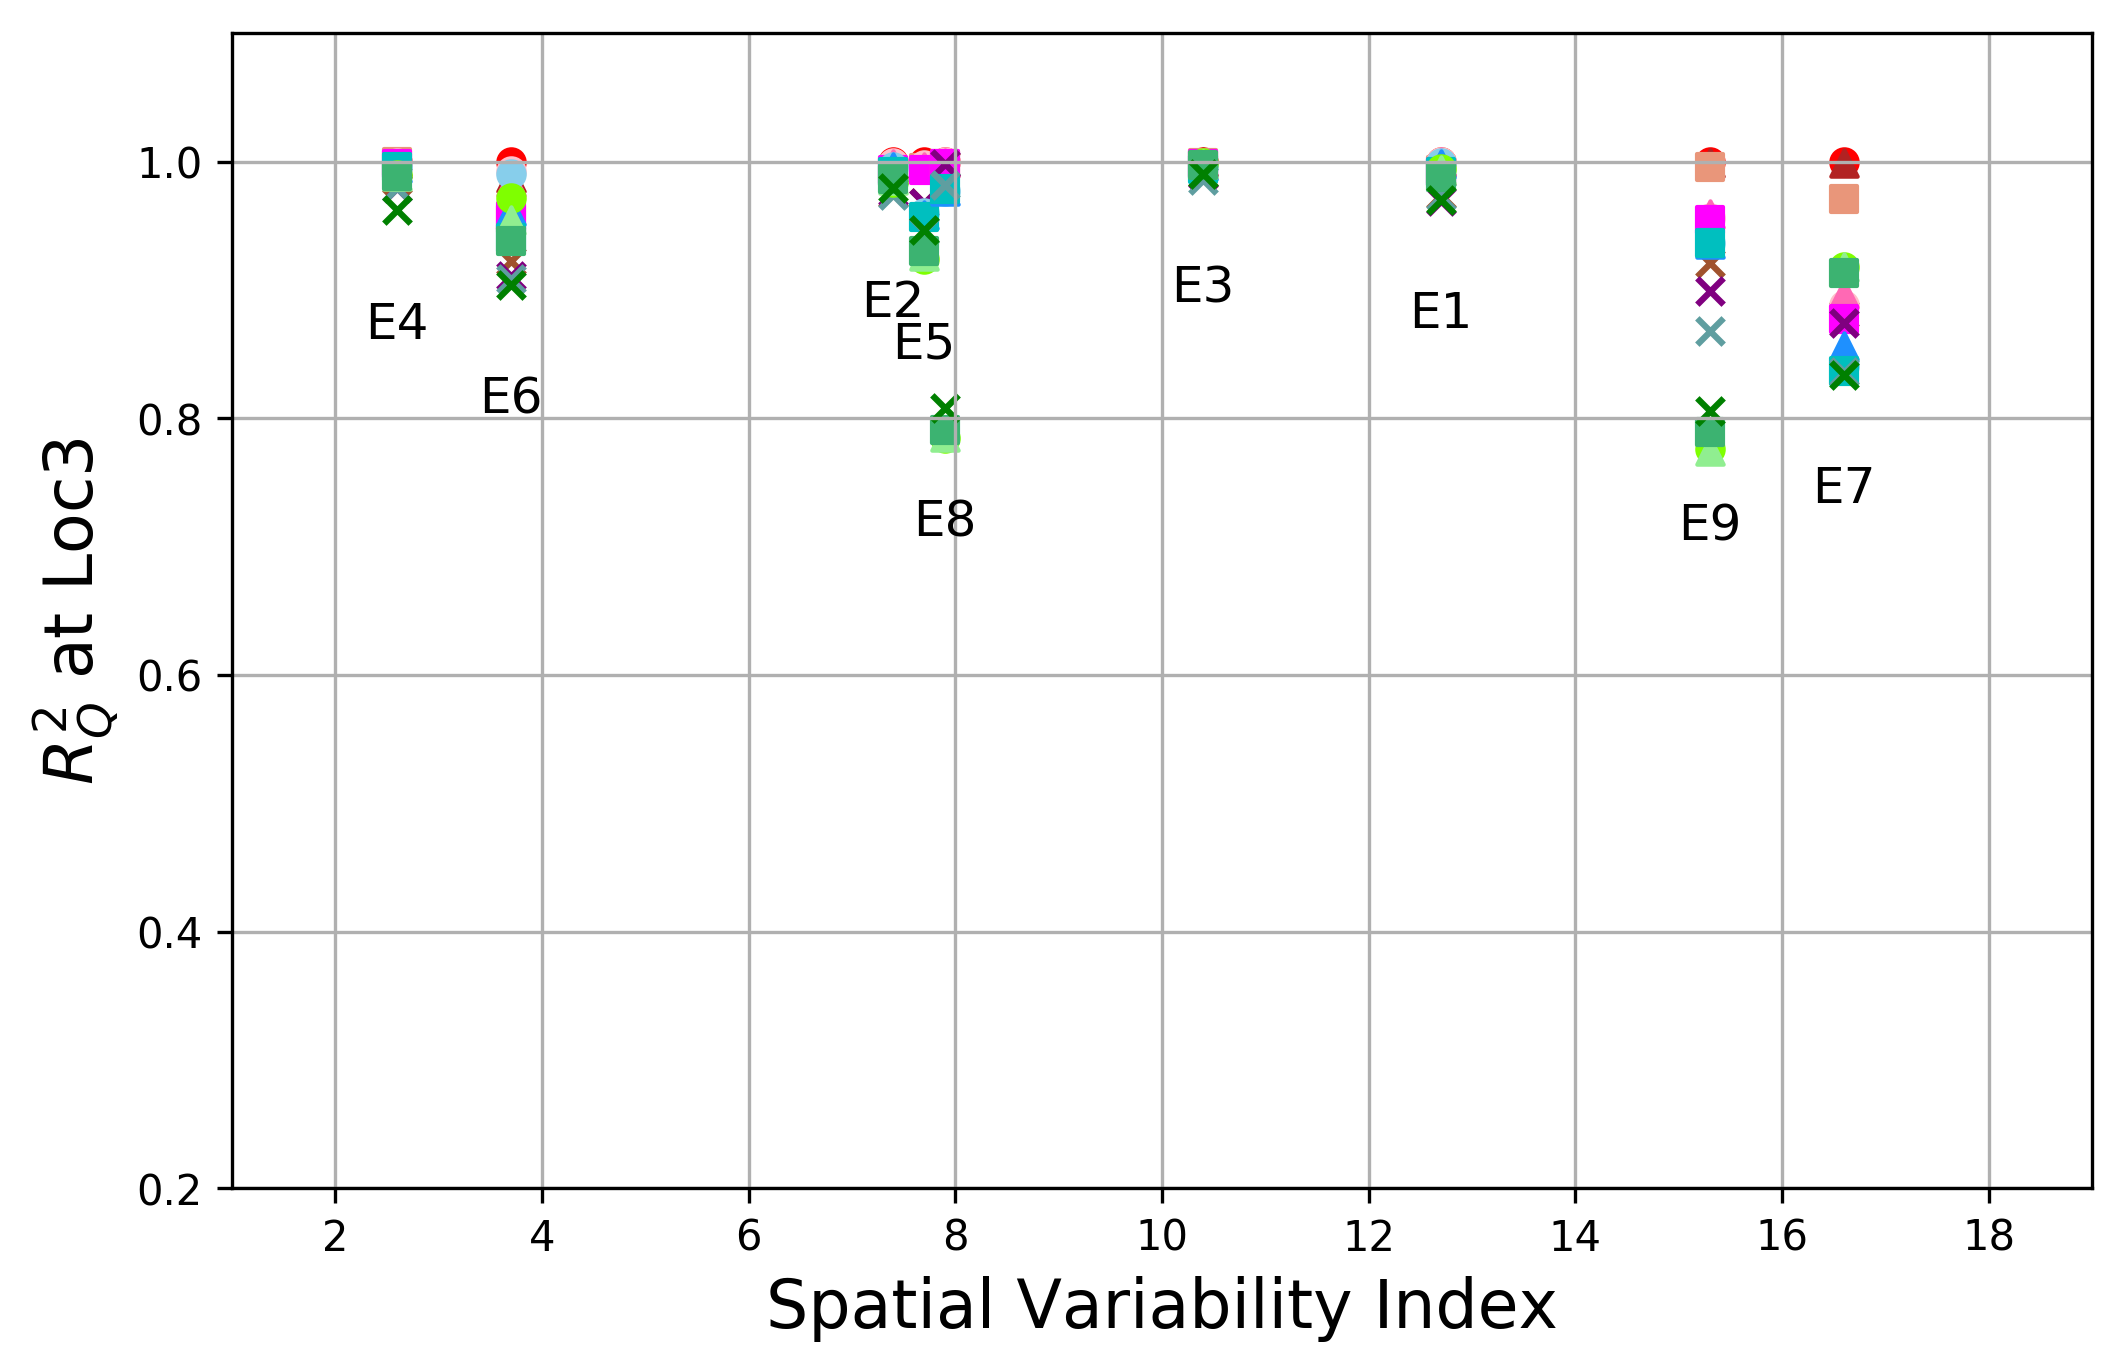

Supplement: Supplementary file 1 [file hess-22-2425-2018-supplement.zip › Order/R2_SVI_loc3.png]

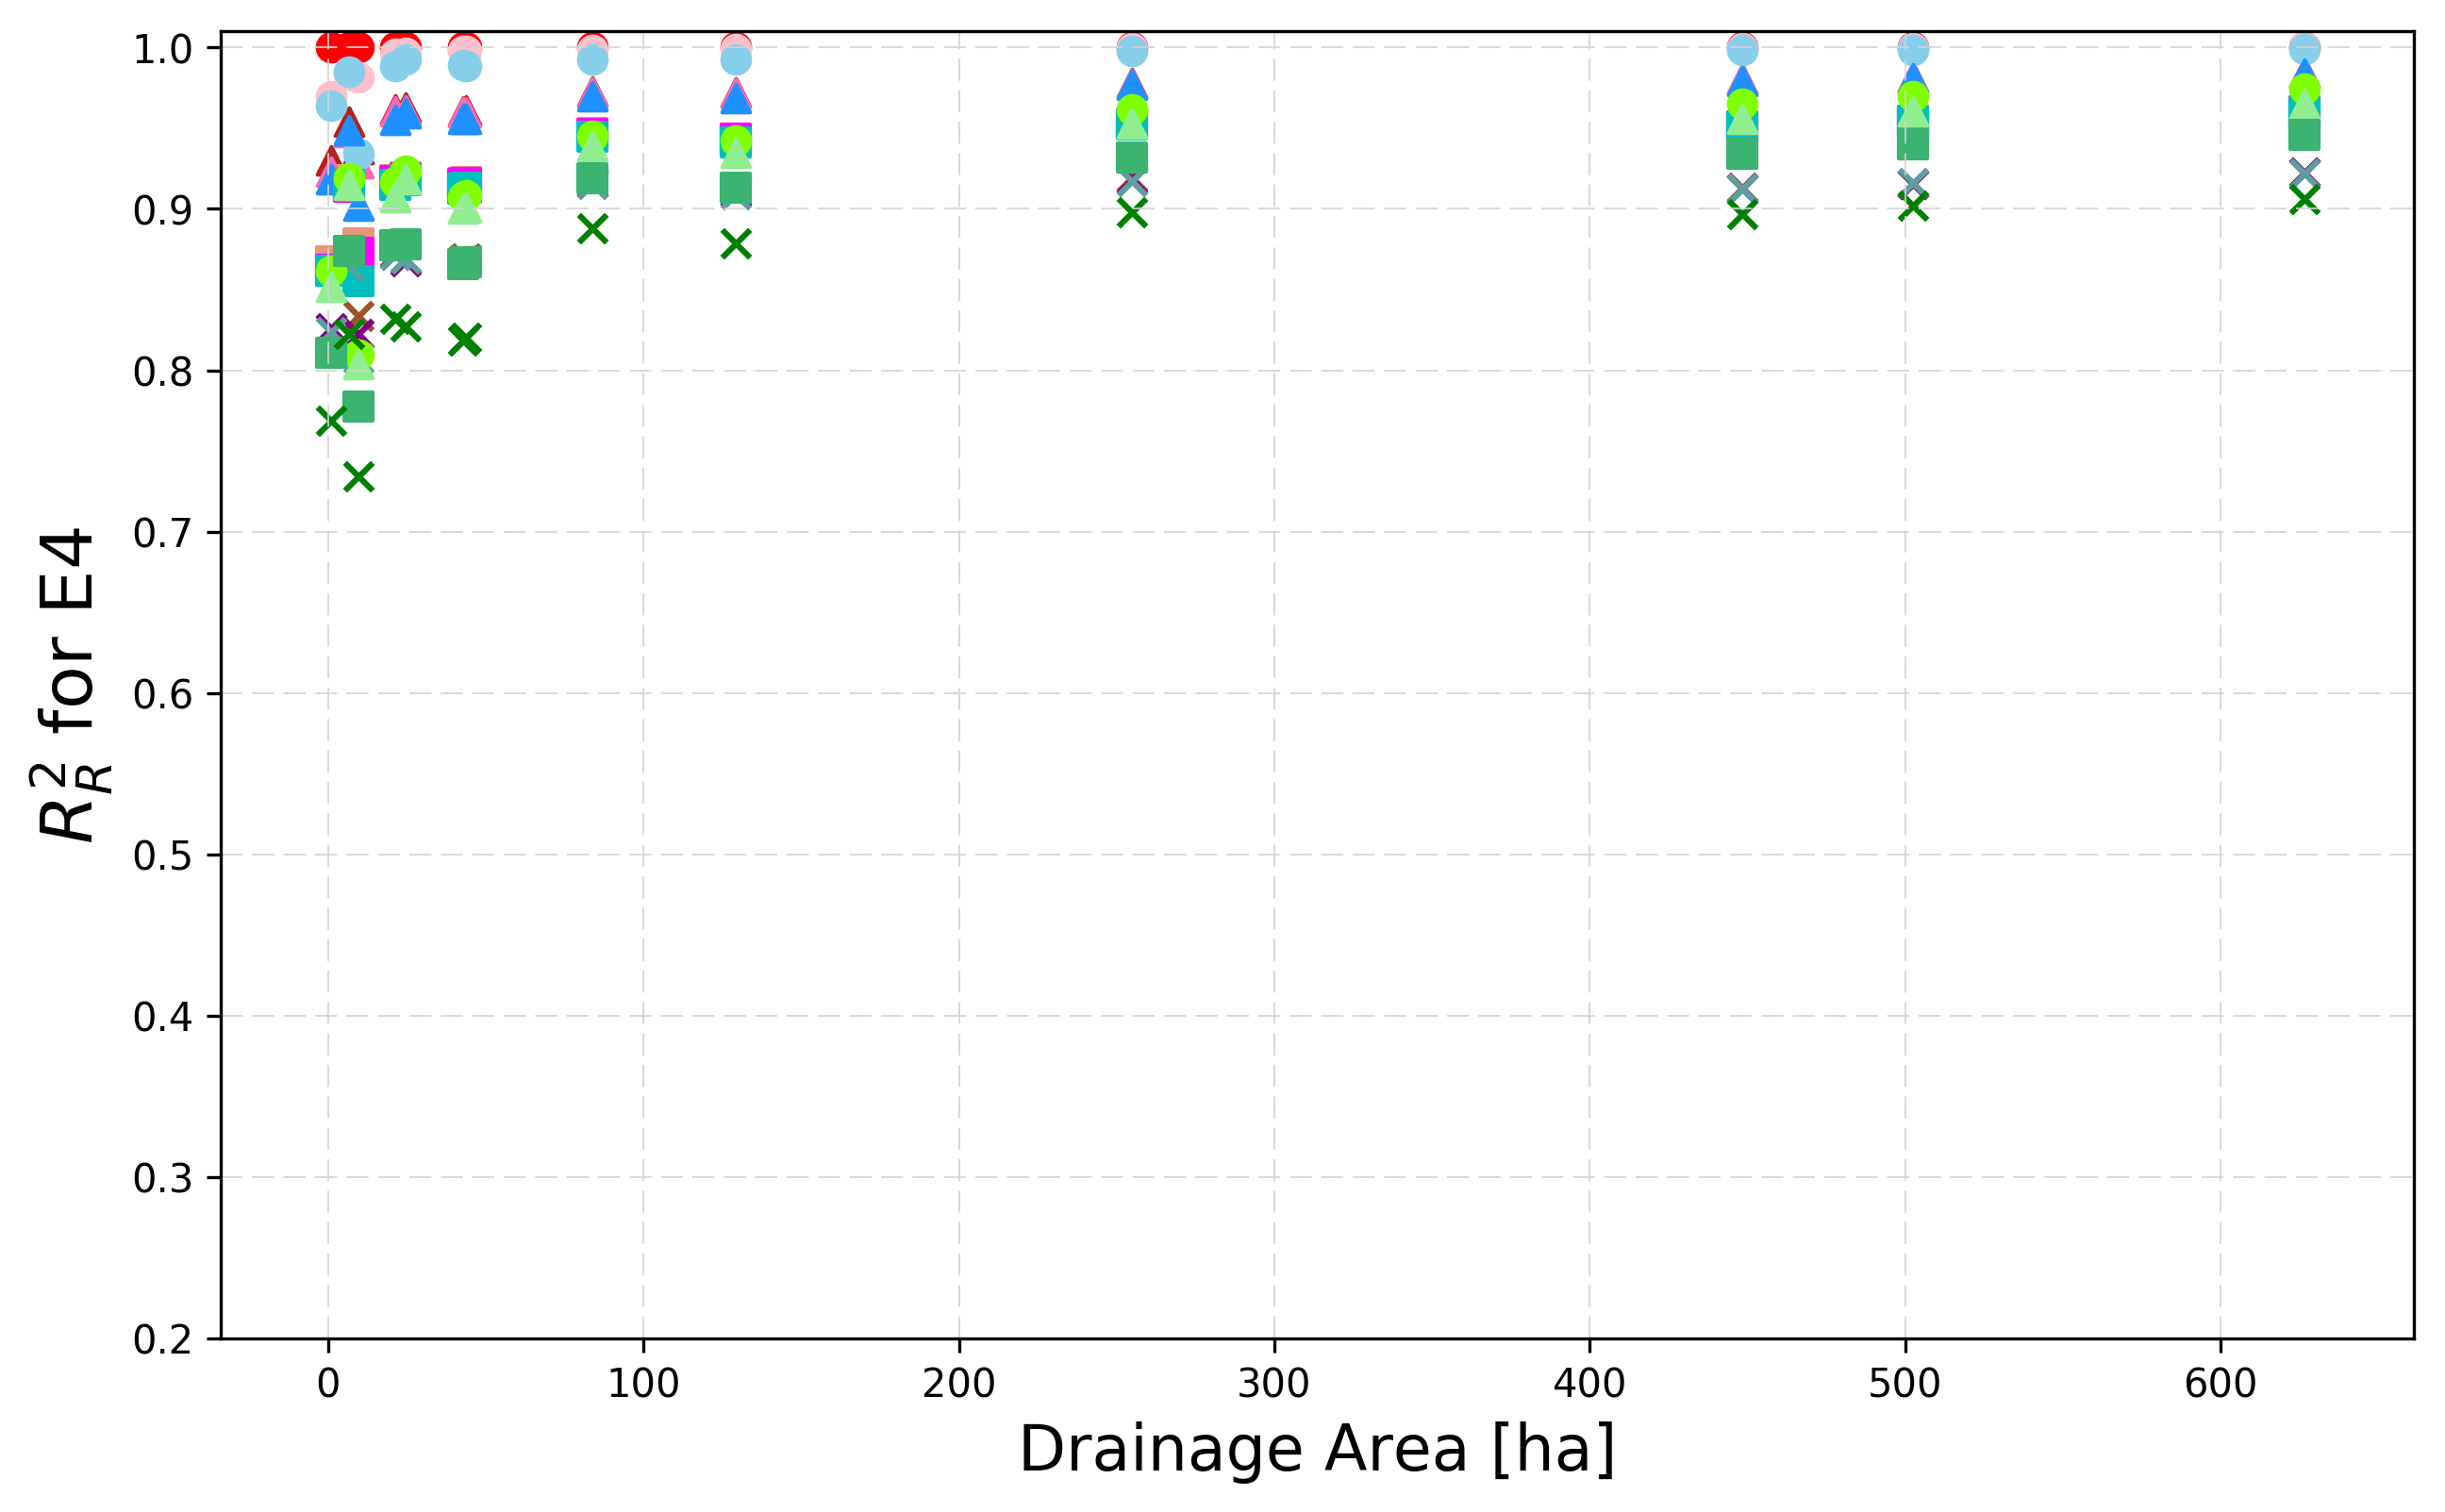

Supplement: Supplementary file 1 [file hess-22-2425-2018-supplement.zip › Rainfall/WA2_rainfall_R2_E4.png]

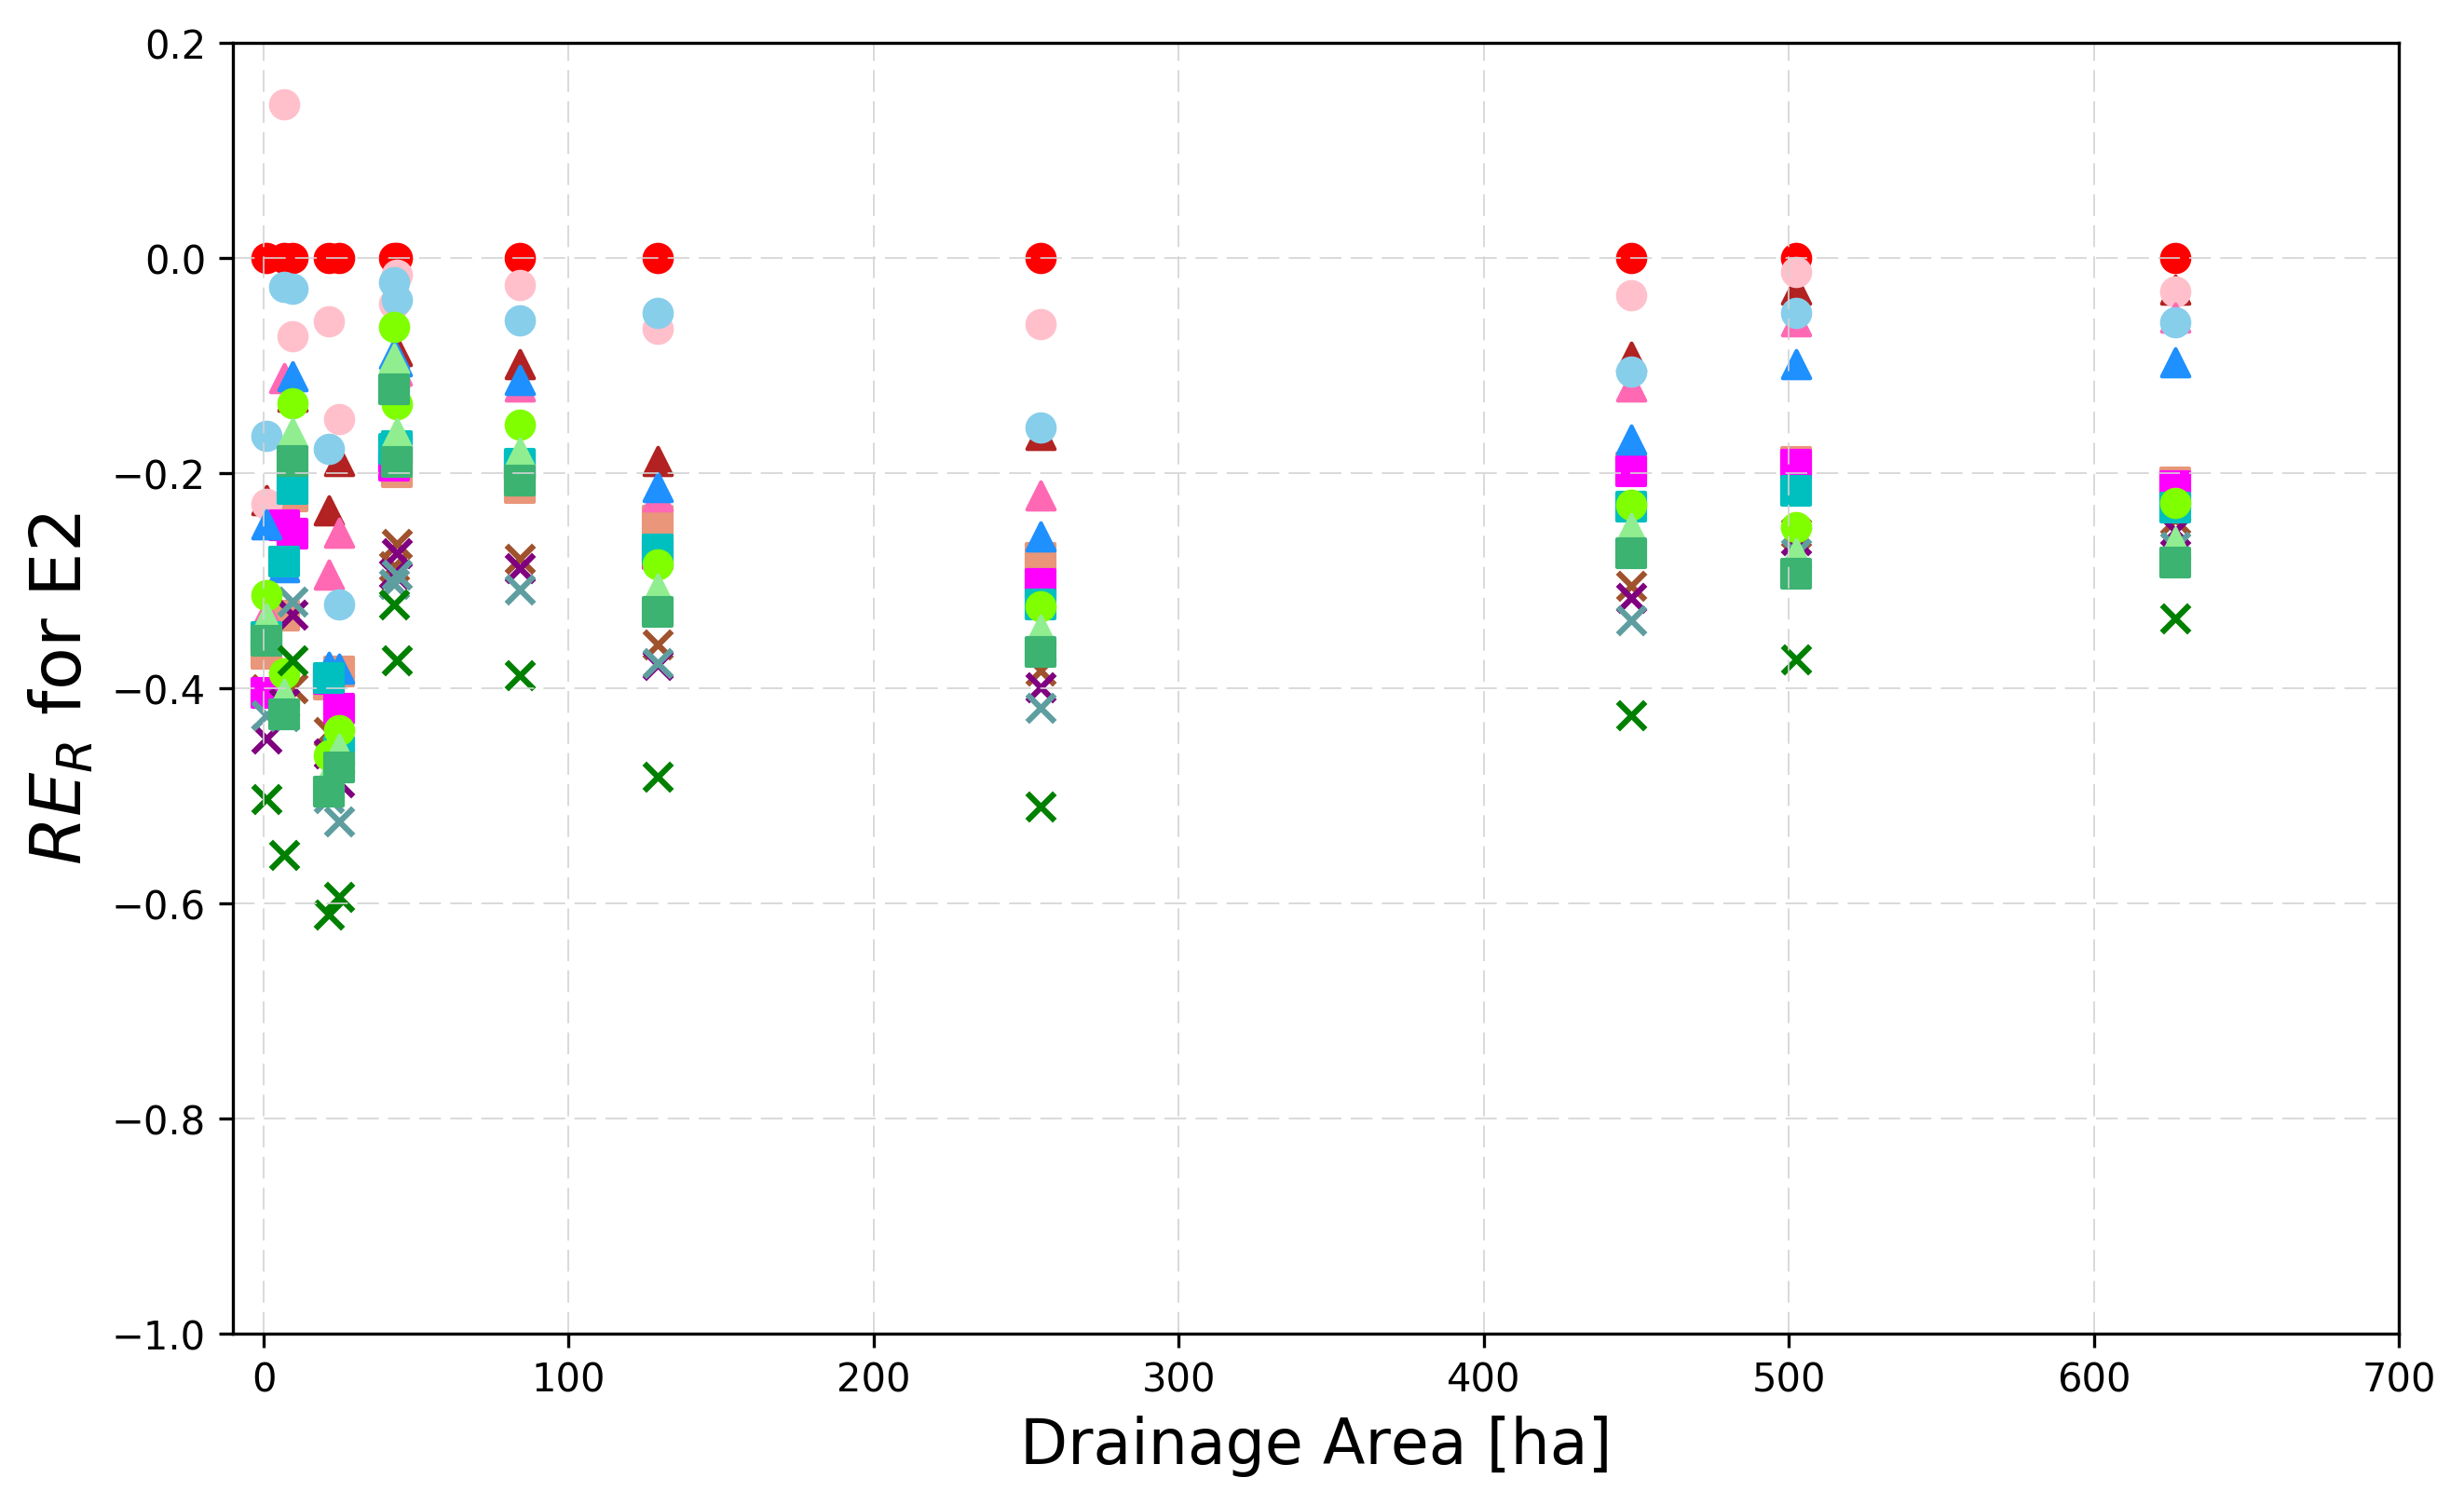

Supplement: Supplementary file 1 [file hess-22-2425-2018-supplement.zip › Rainfall/WA2_rainfall_RE_E2.png]

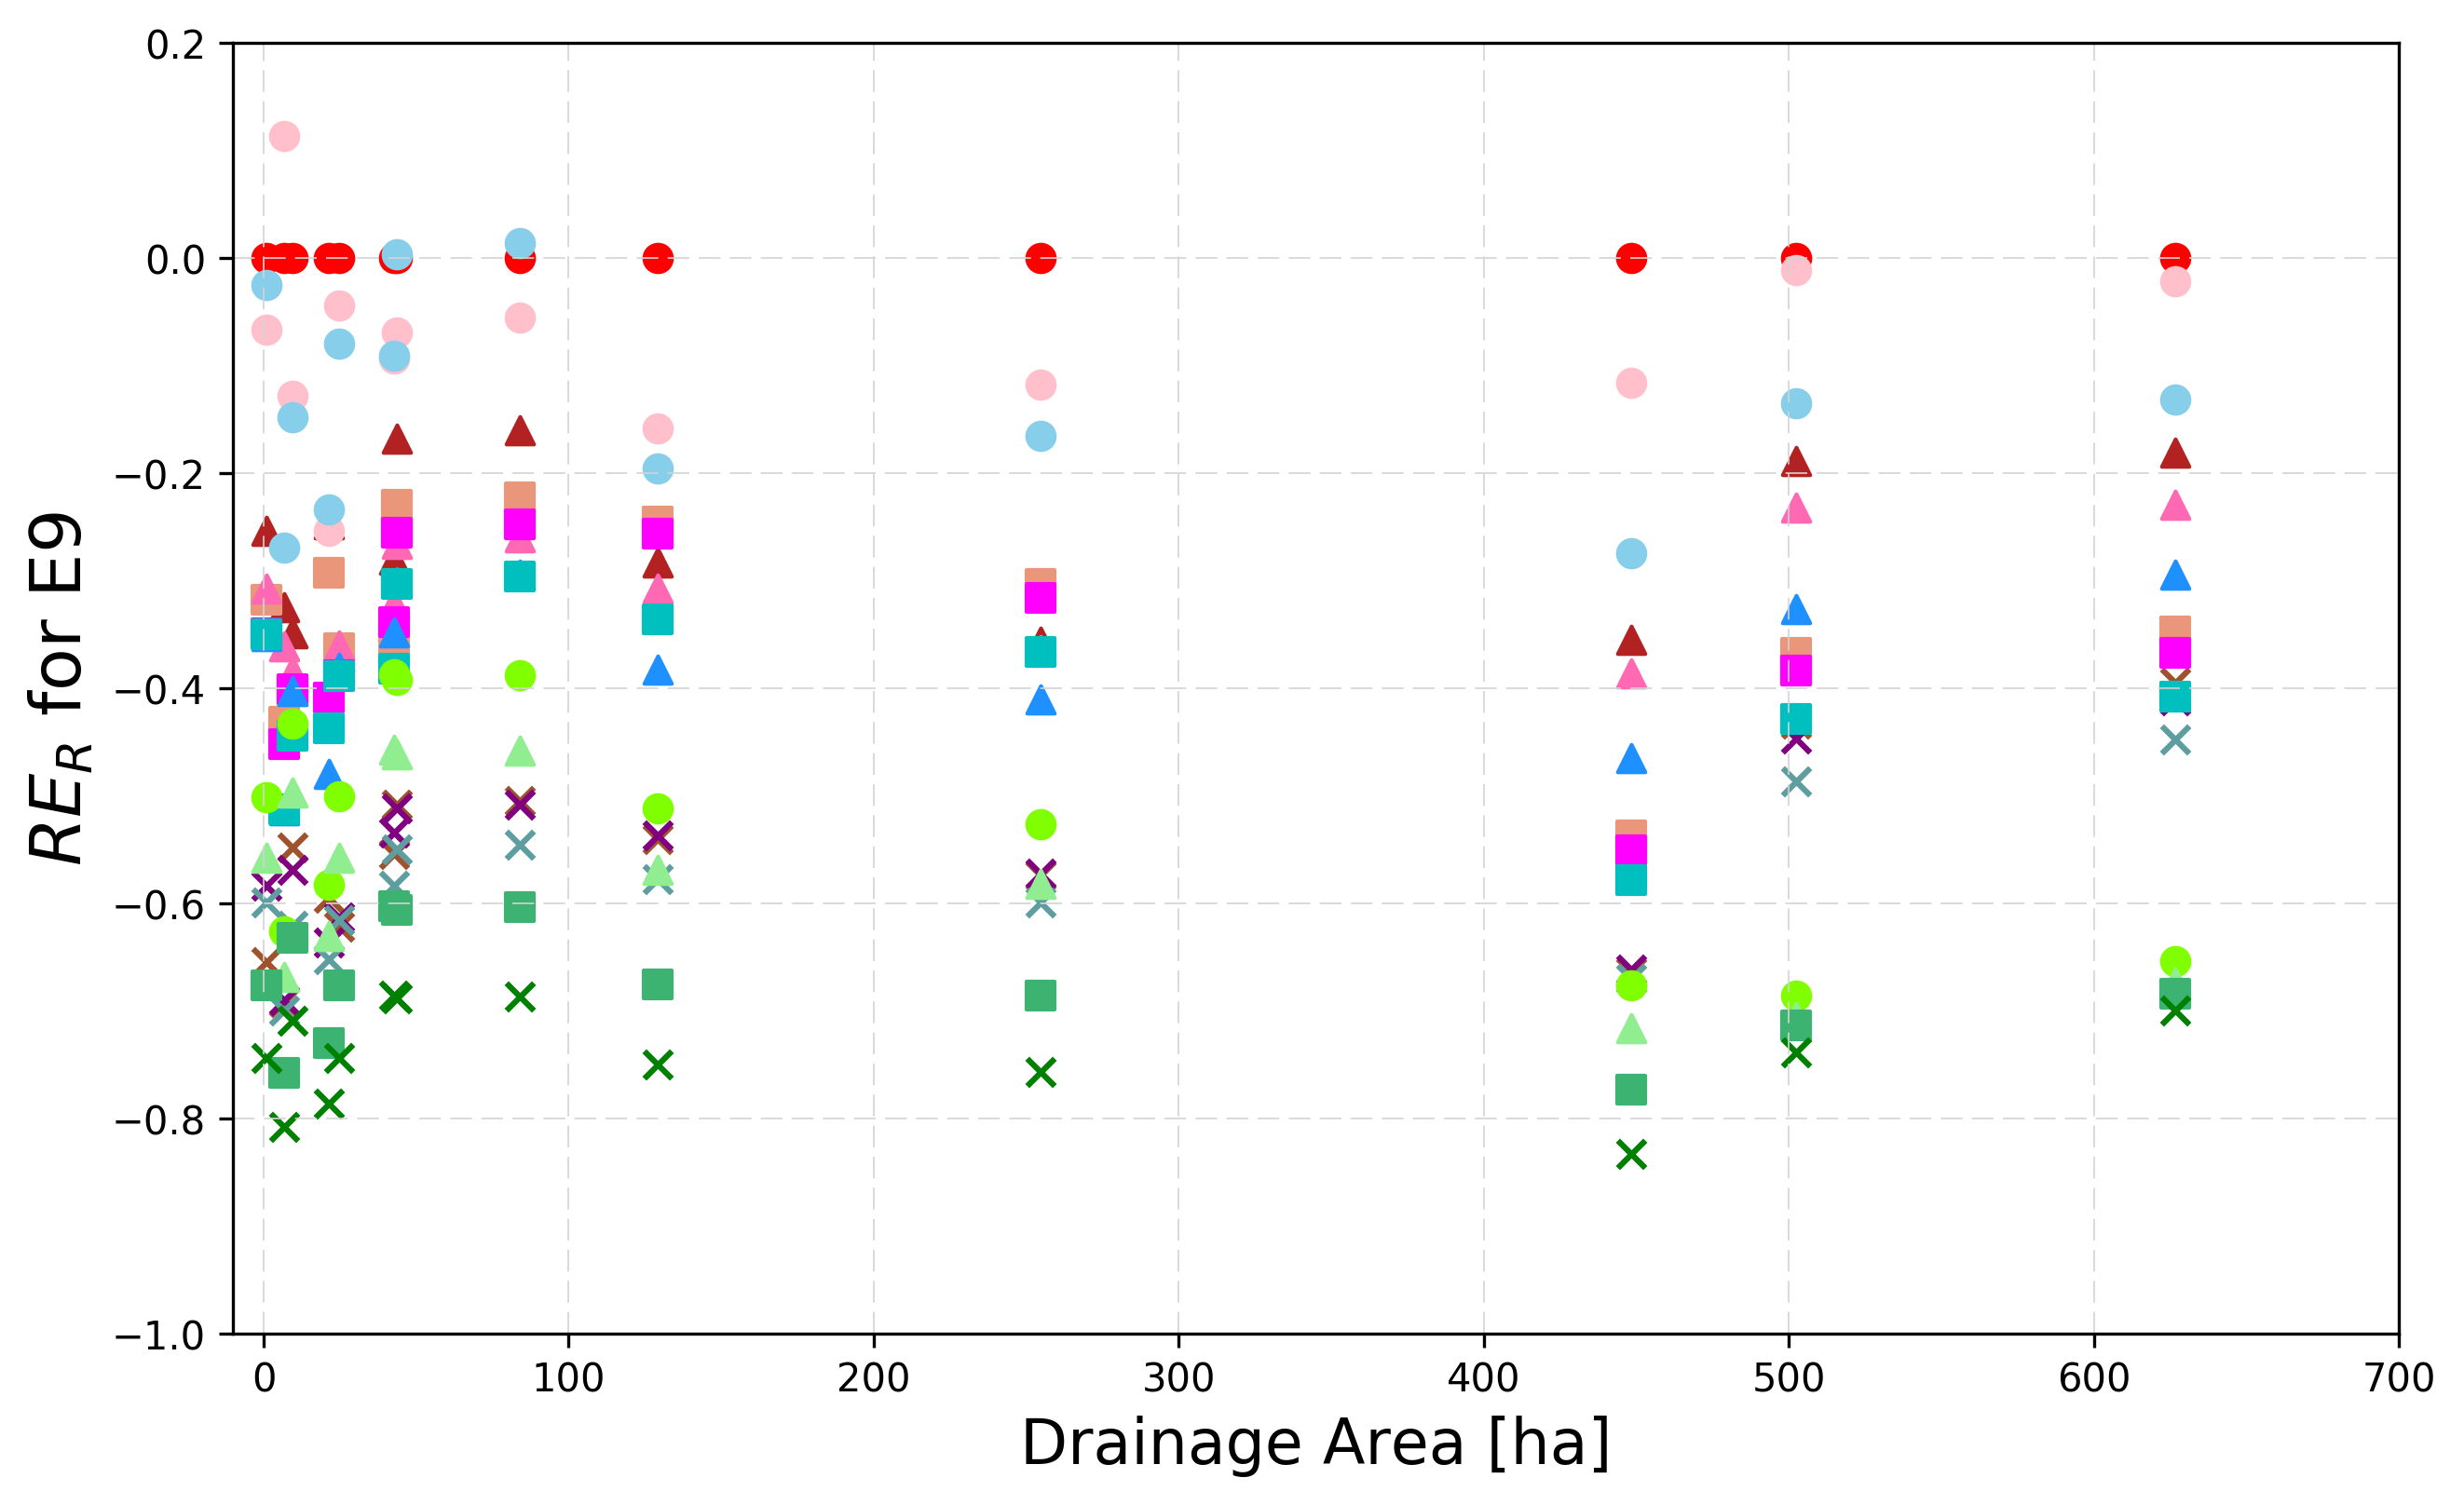

Supplement: Supplementary file 1 [file hess-22-2425-2018-supplement.zip › Rainfall/WA2_rainfall_RE_E9.png]

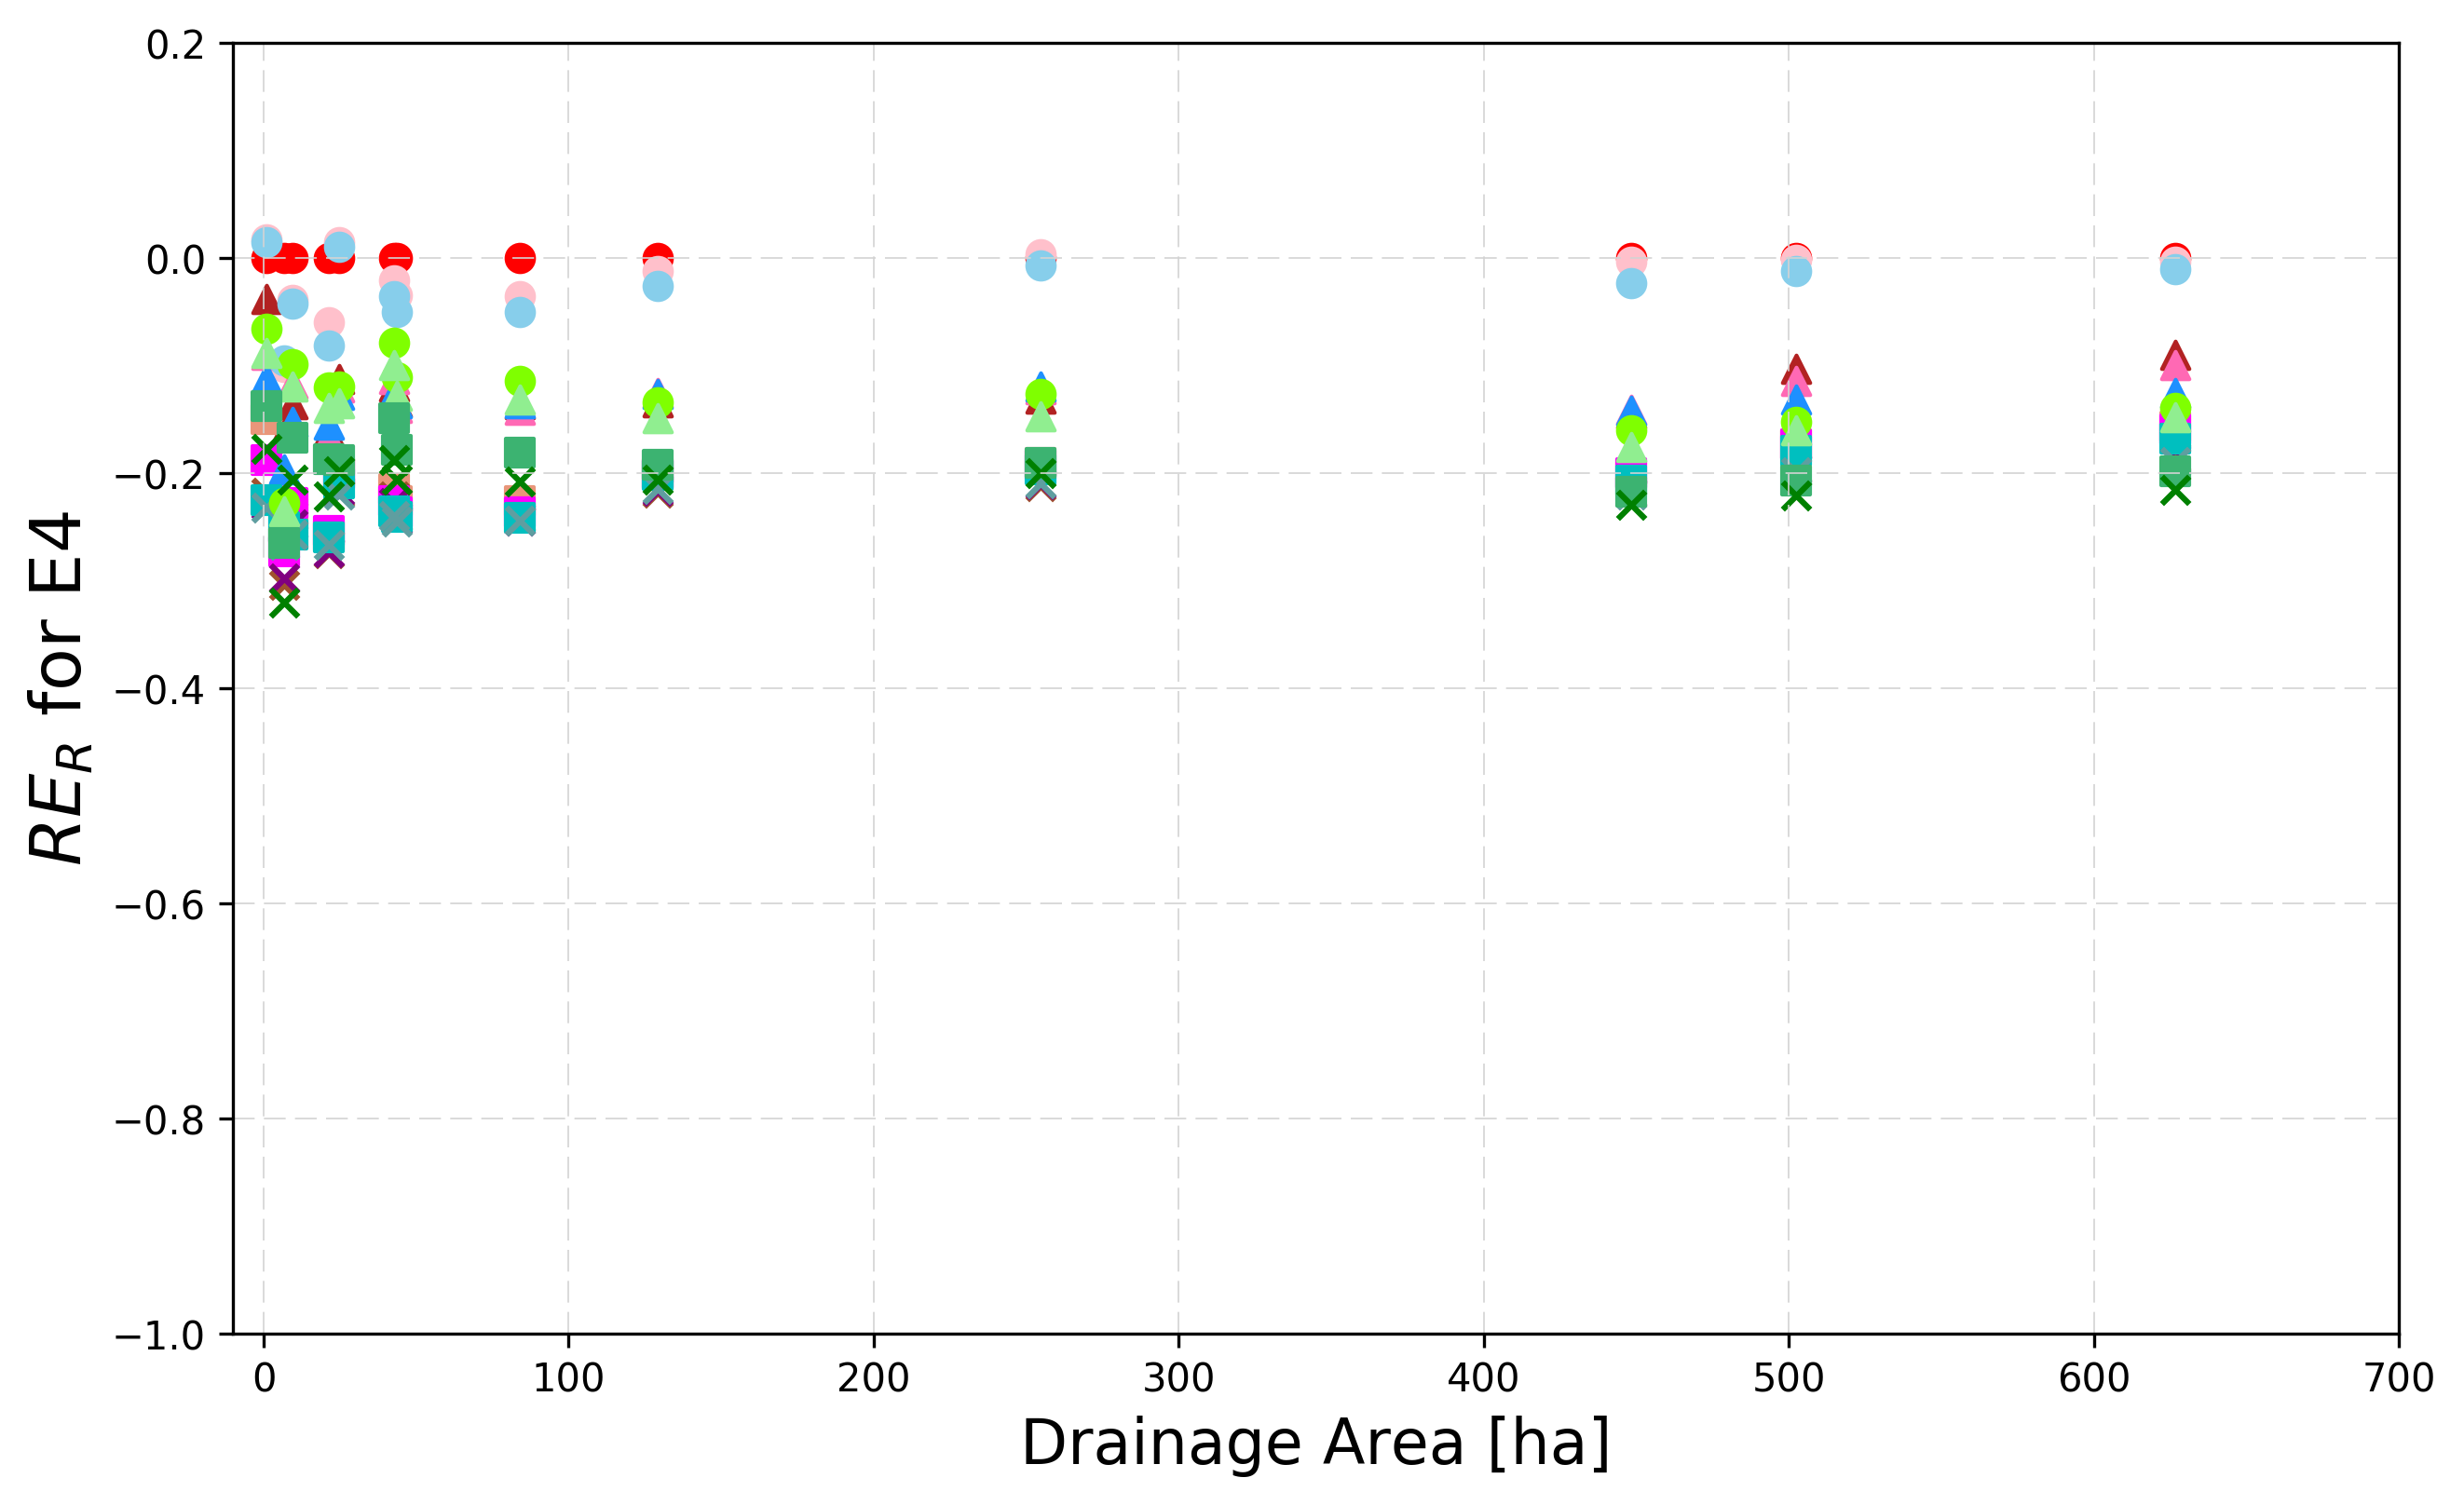

Supplement: Supplementary file 1 [file hess-22-2425-2018-supplement.zip › Rainfall/WA2_rainfall_RE_E4.png]

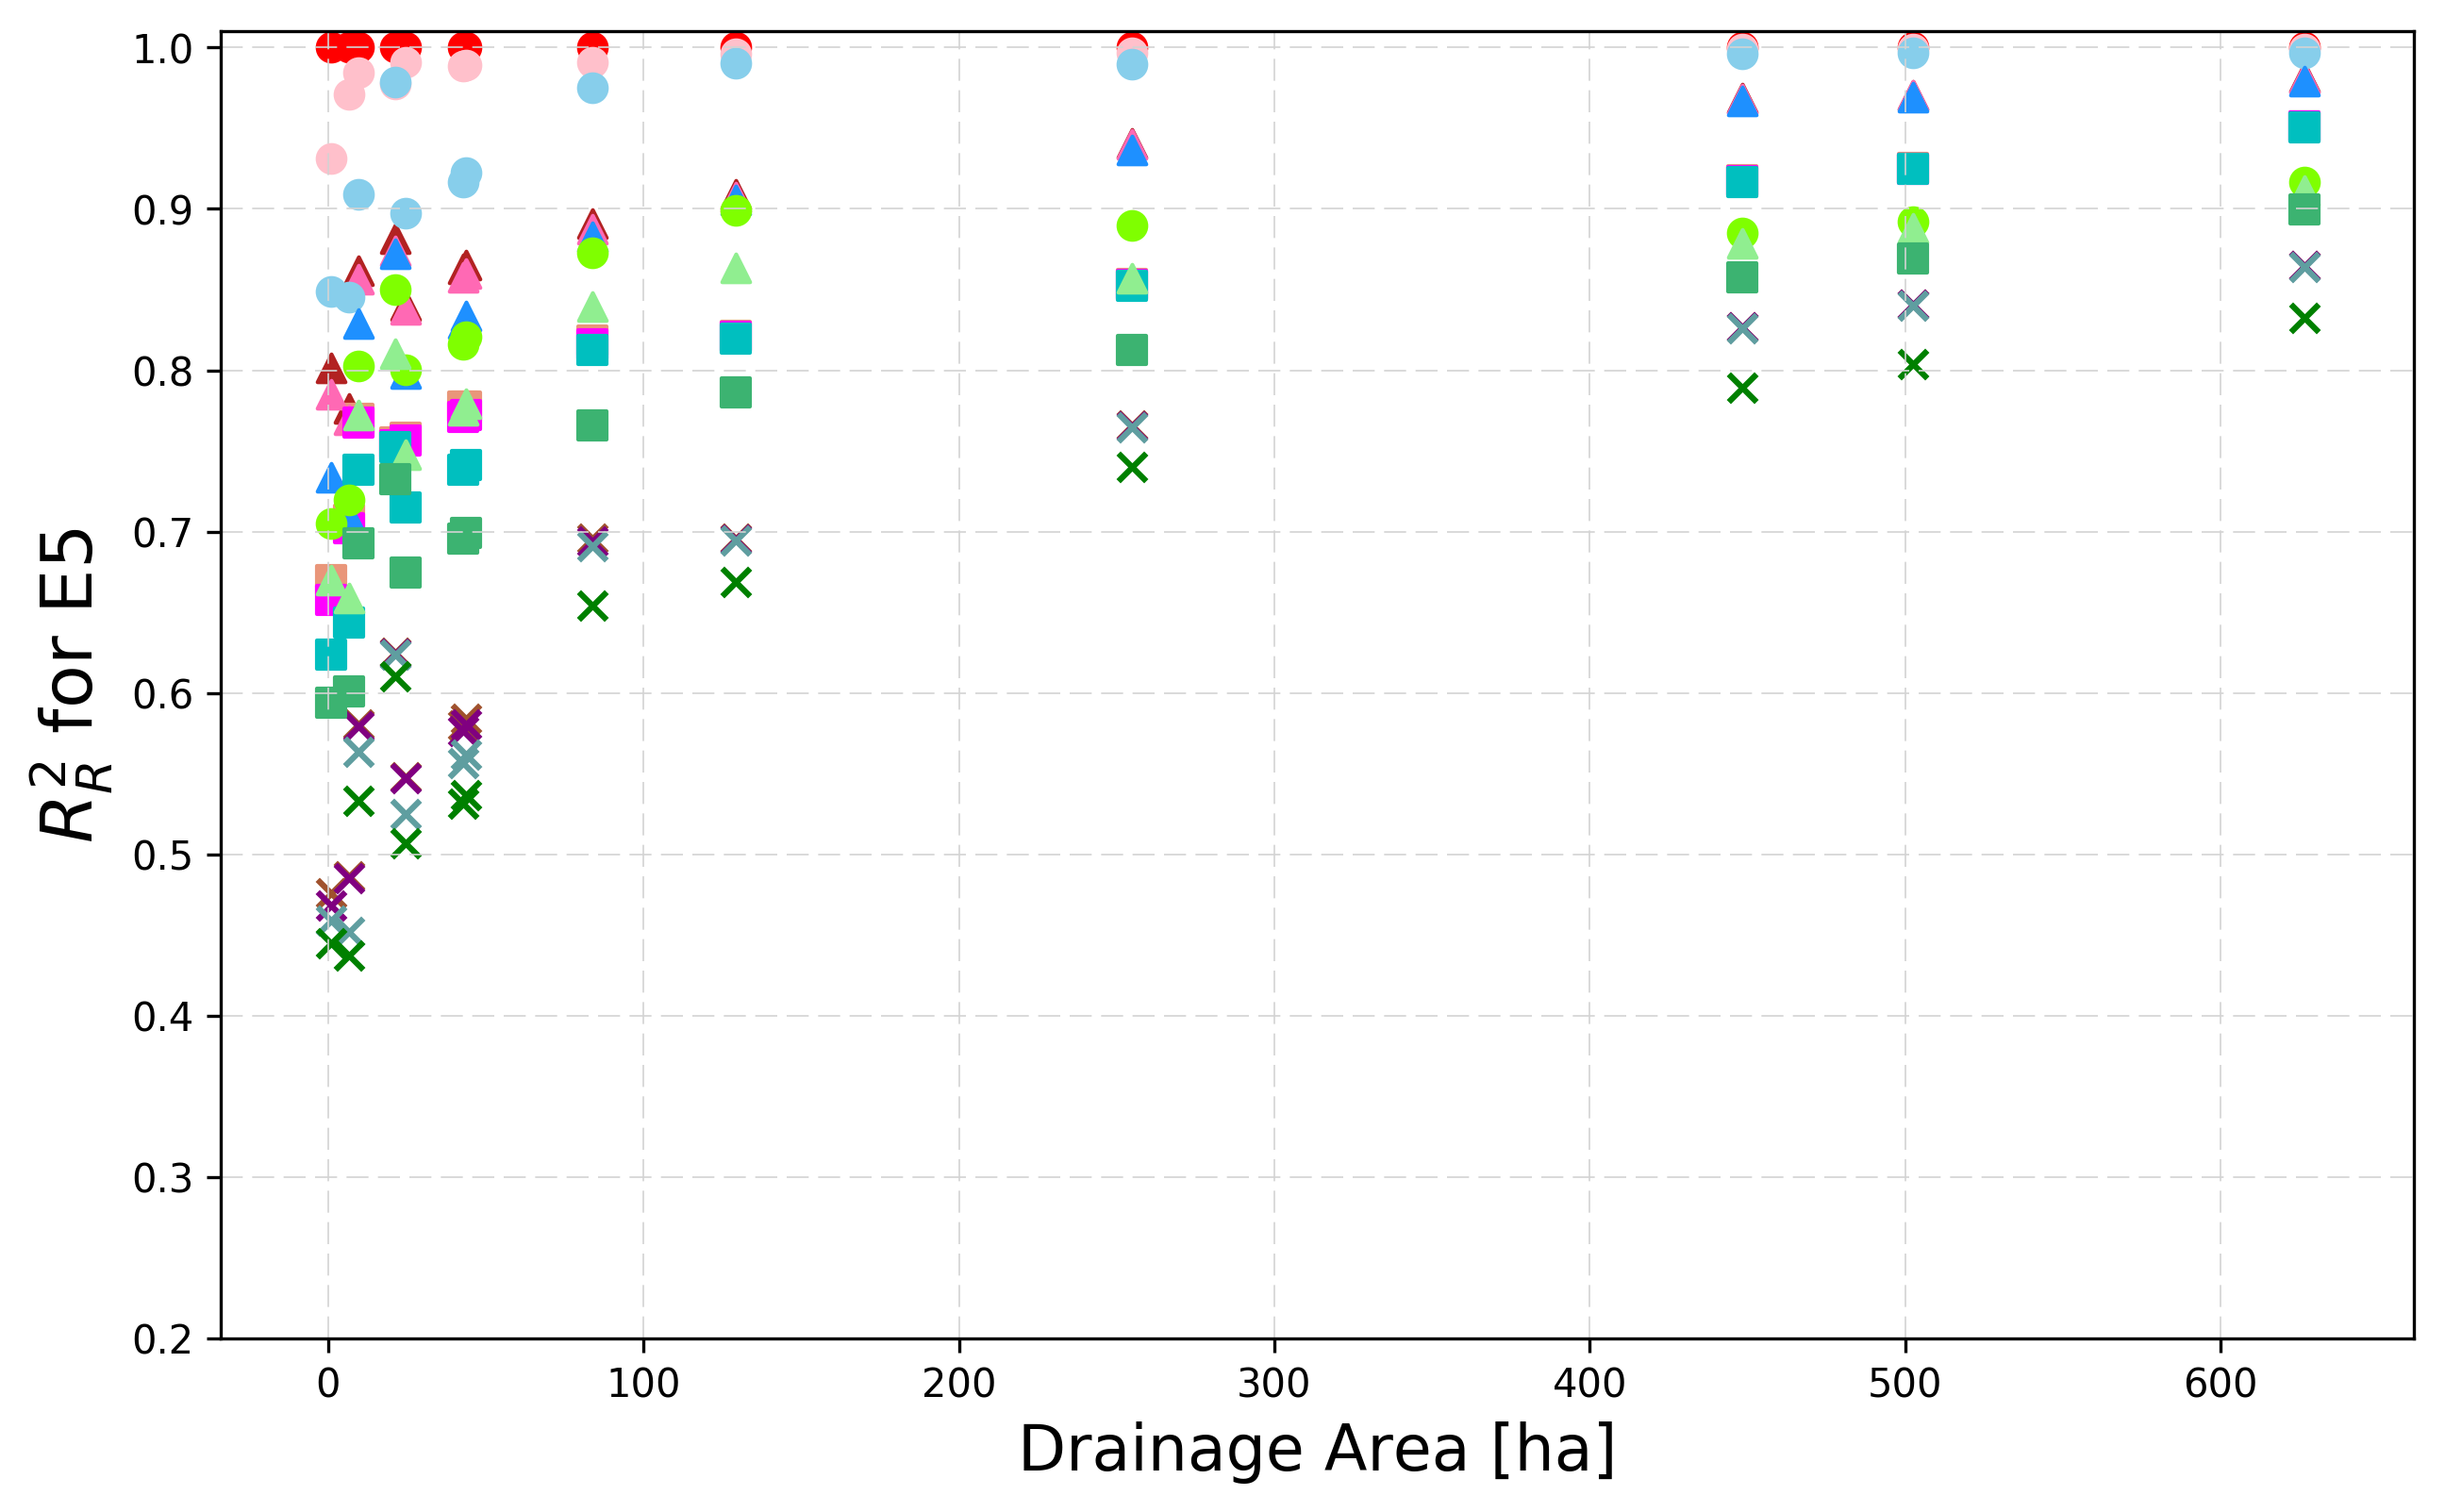

Supplement: Supplementary file 1 [file hess-22-2425-2018-supplement.zip › Rainfall/WA2_rainfall_R2_E5.png]

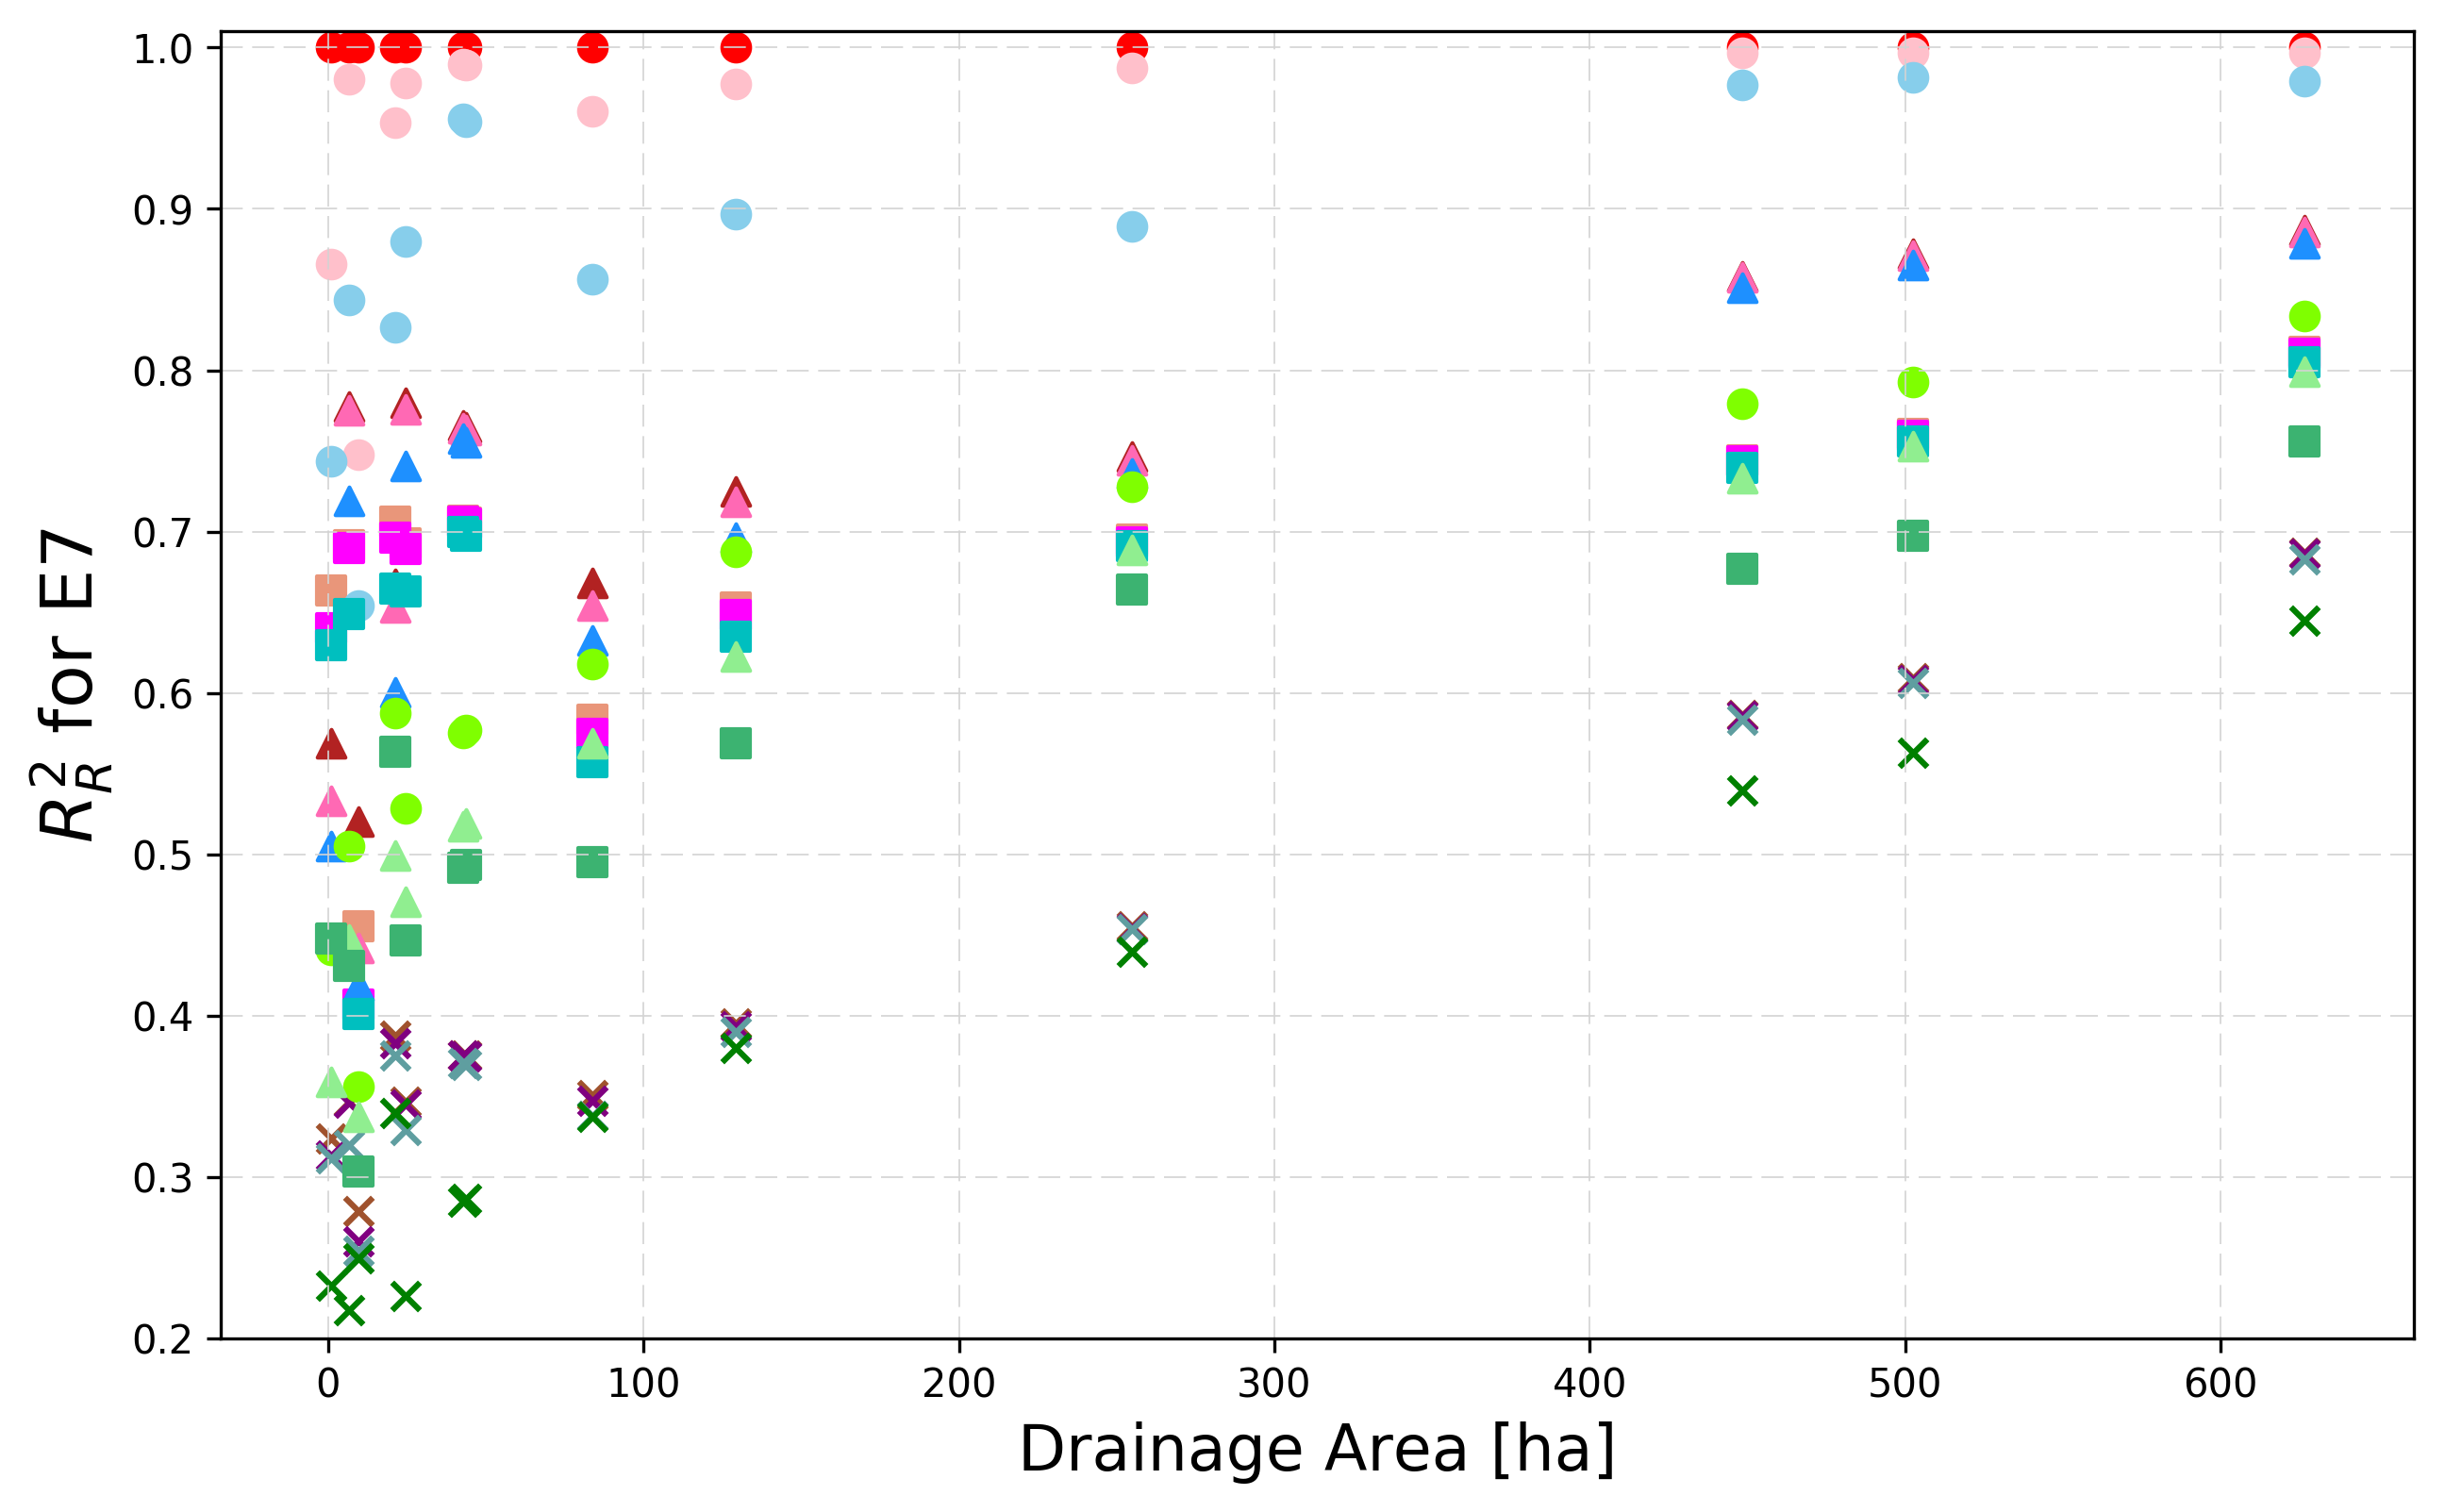

Supplement: Supplementary file 1 [file hess-22-2425-2018-supplement.zip › Rainfall/WA2_rainfall_R2_E7.png]

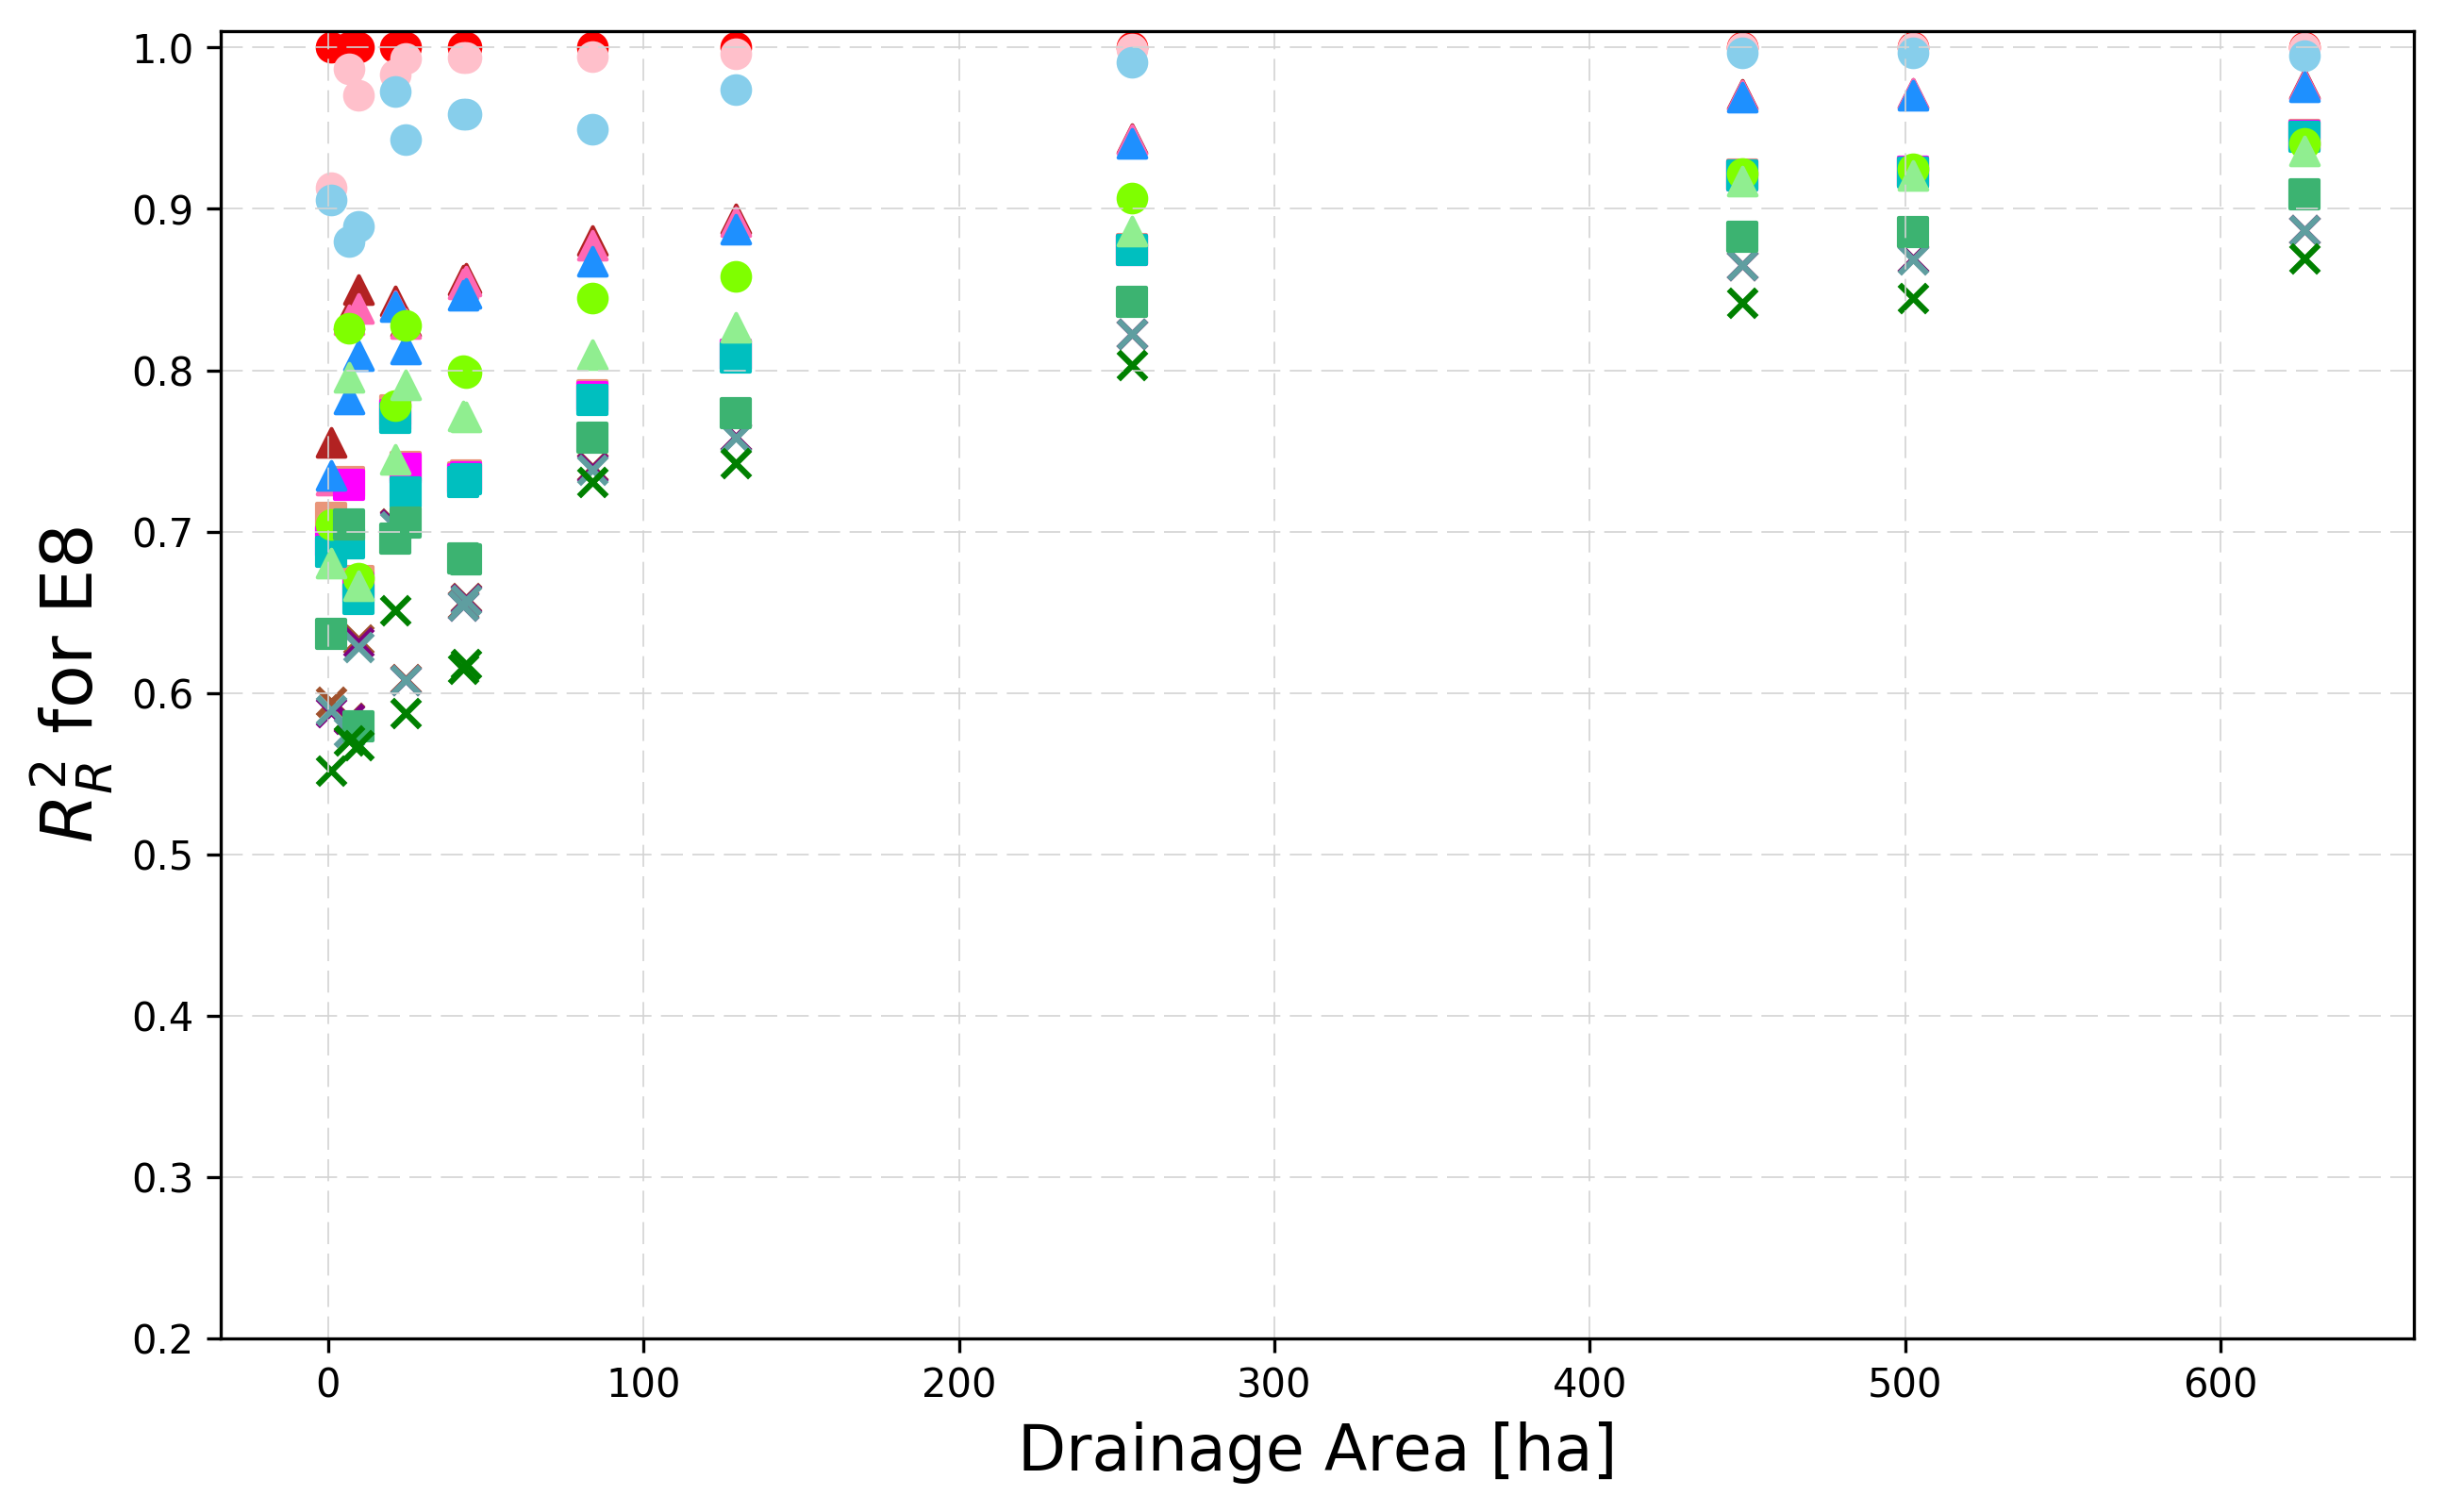

Supplement: Supplementary file 1 [file hess-22-2425-2018-supplement.zip › Rainfall/WA2_rainfall_R2_E8.png]

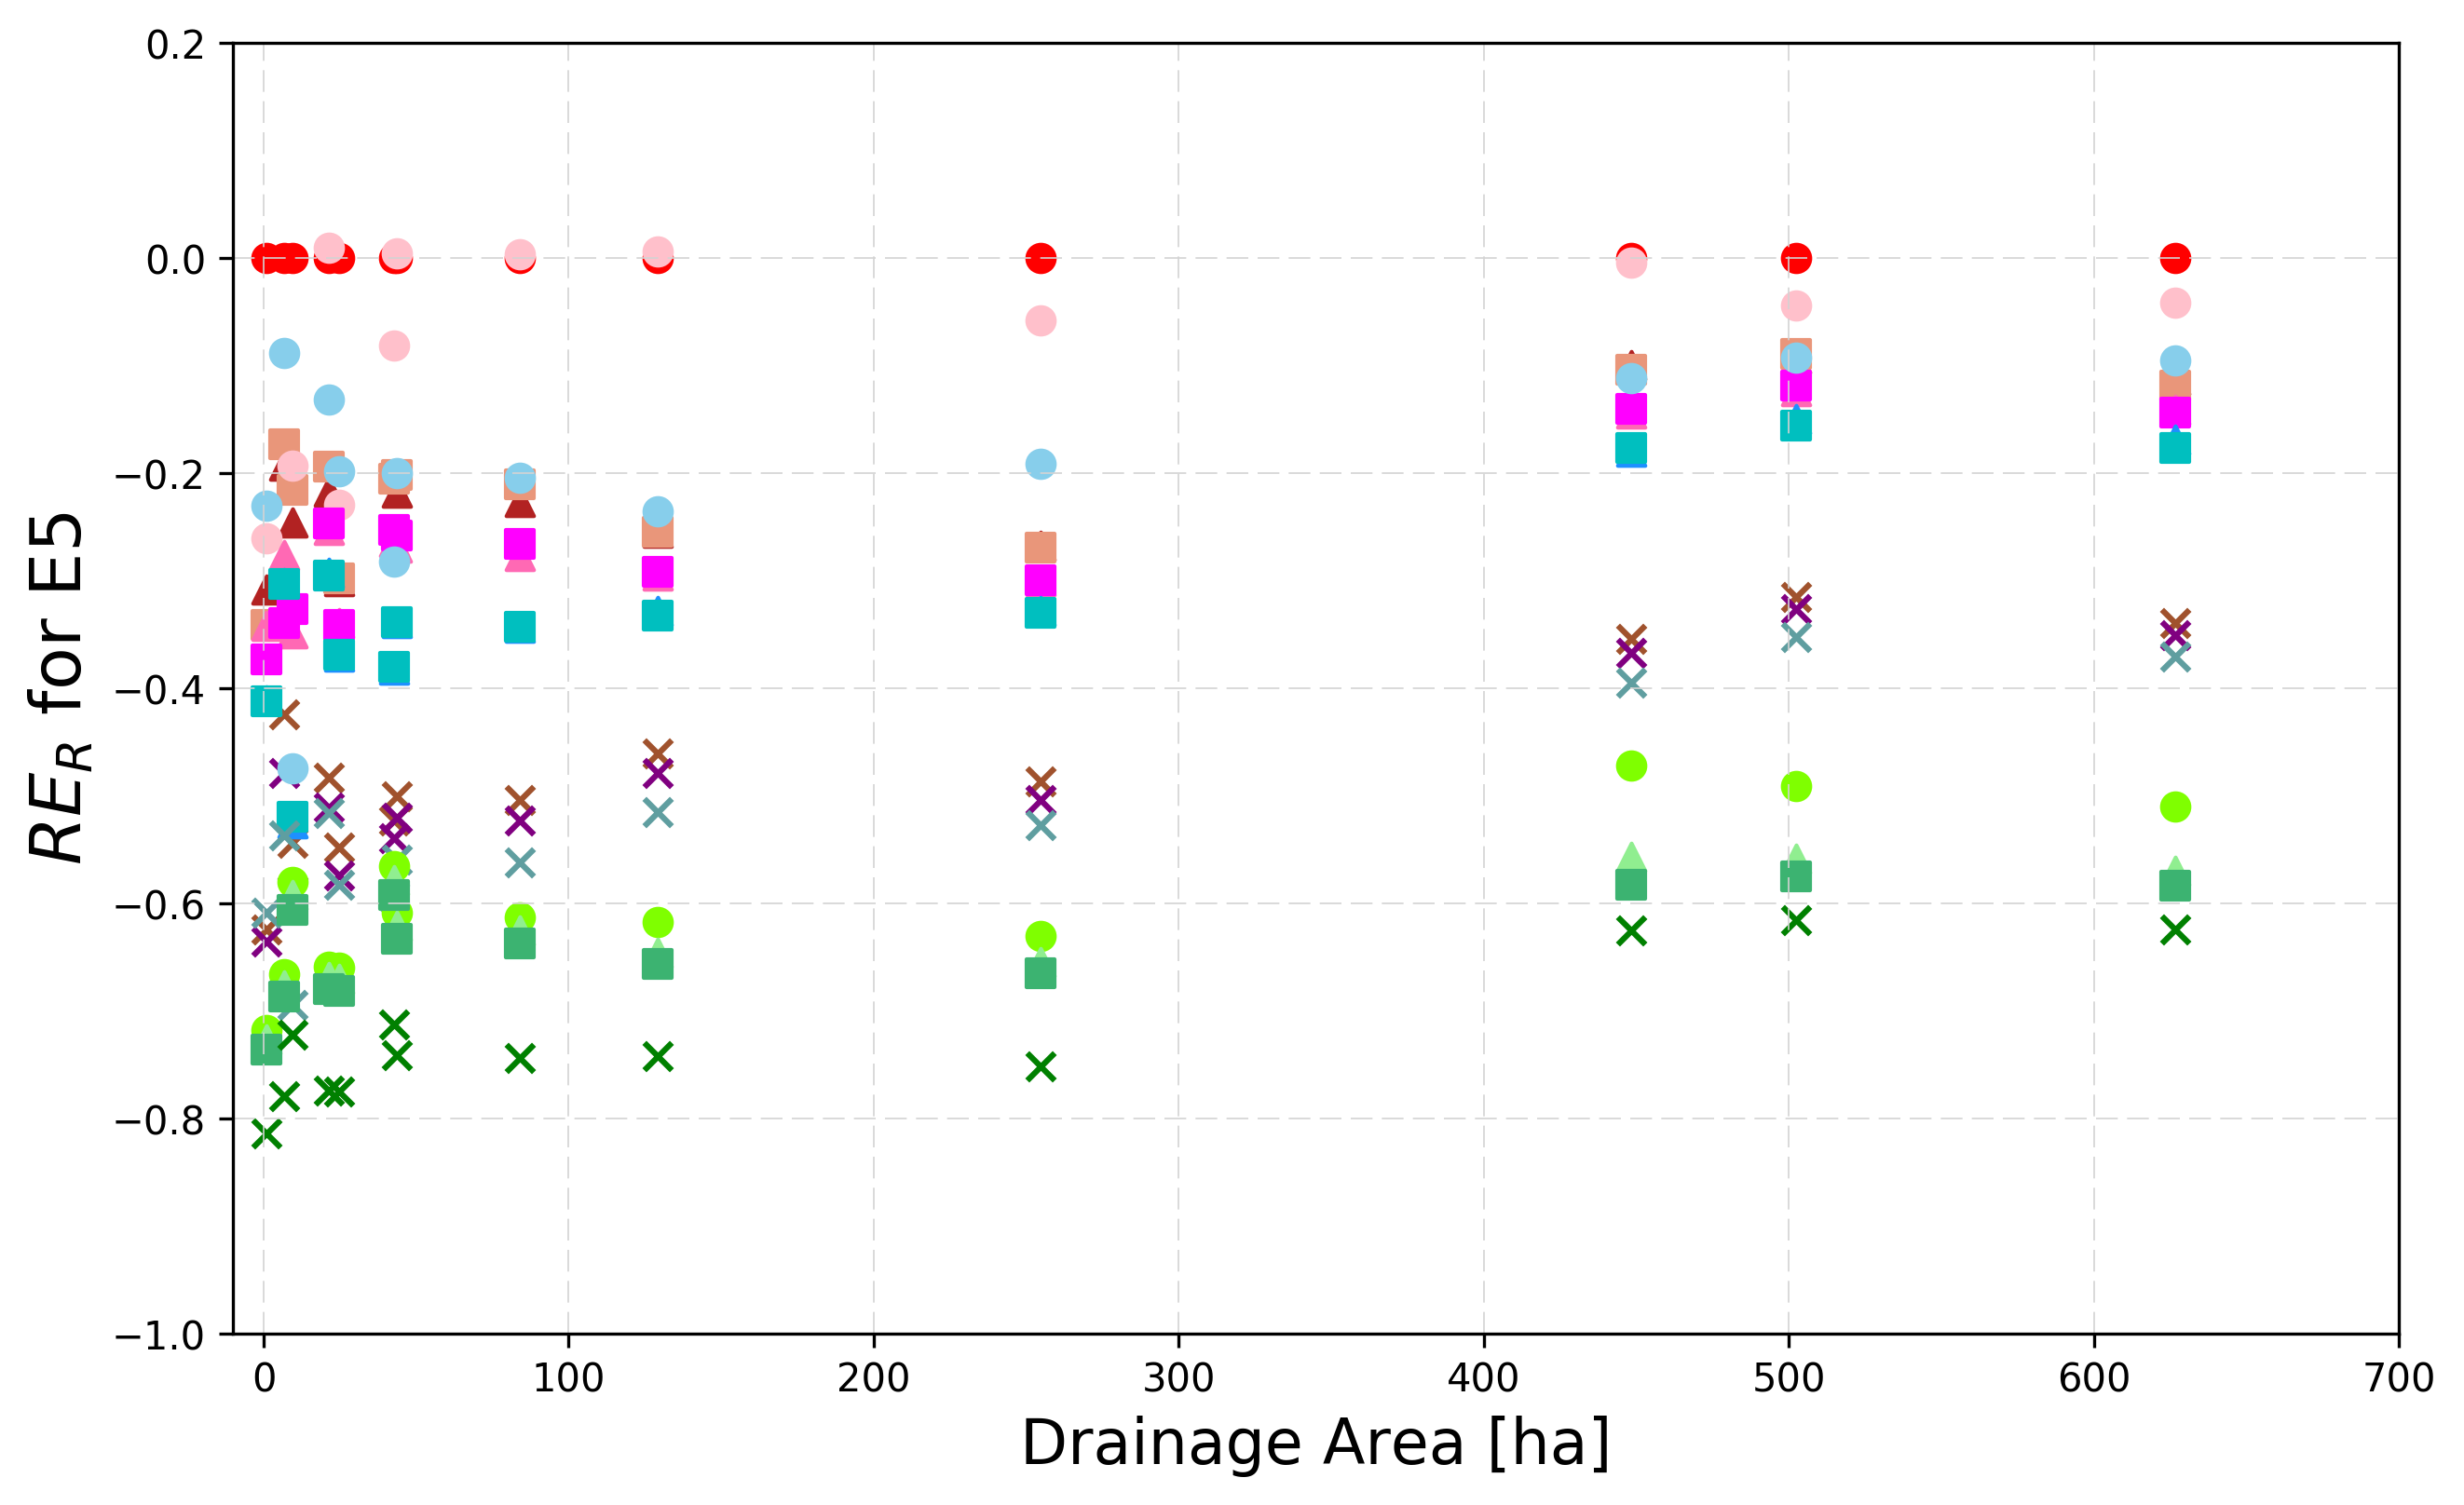

Supplement: Supplementary file 1 [file hess-22-2425-2018-supplement.zip › Rainfall/WA2_rainfall_RE_E5.png]

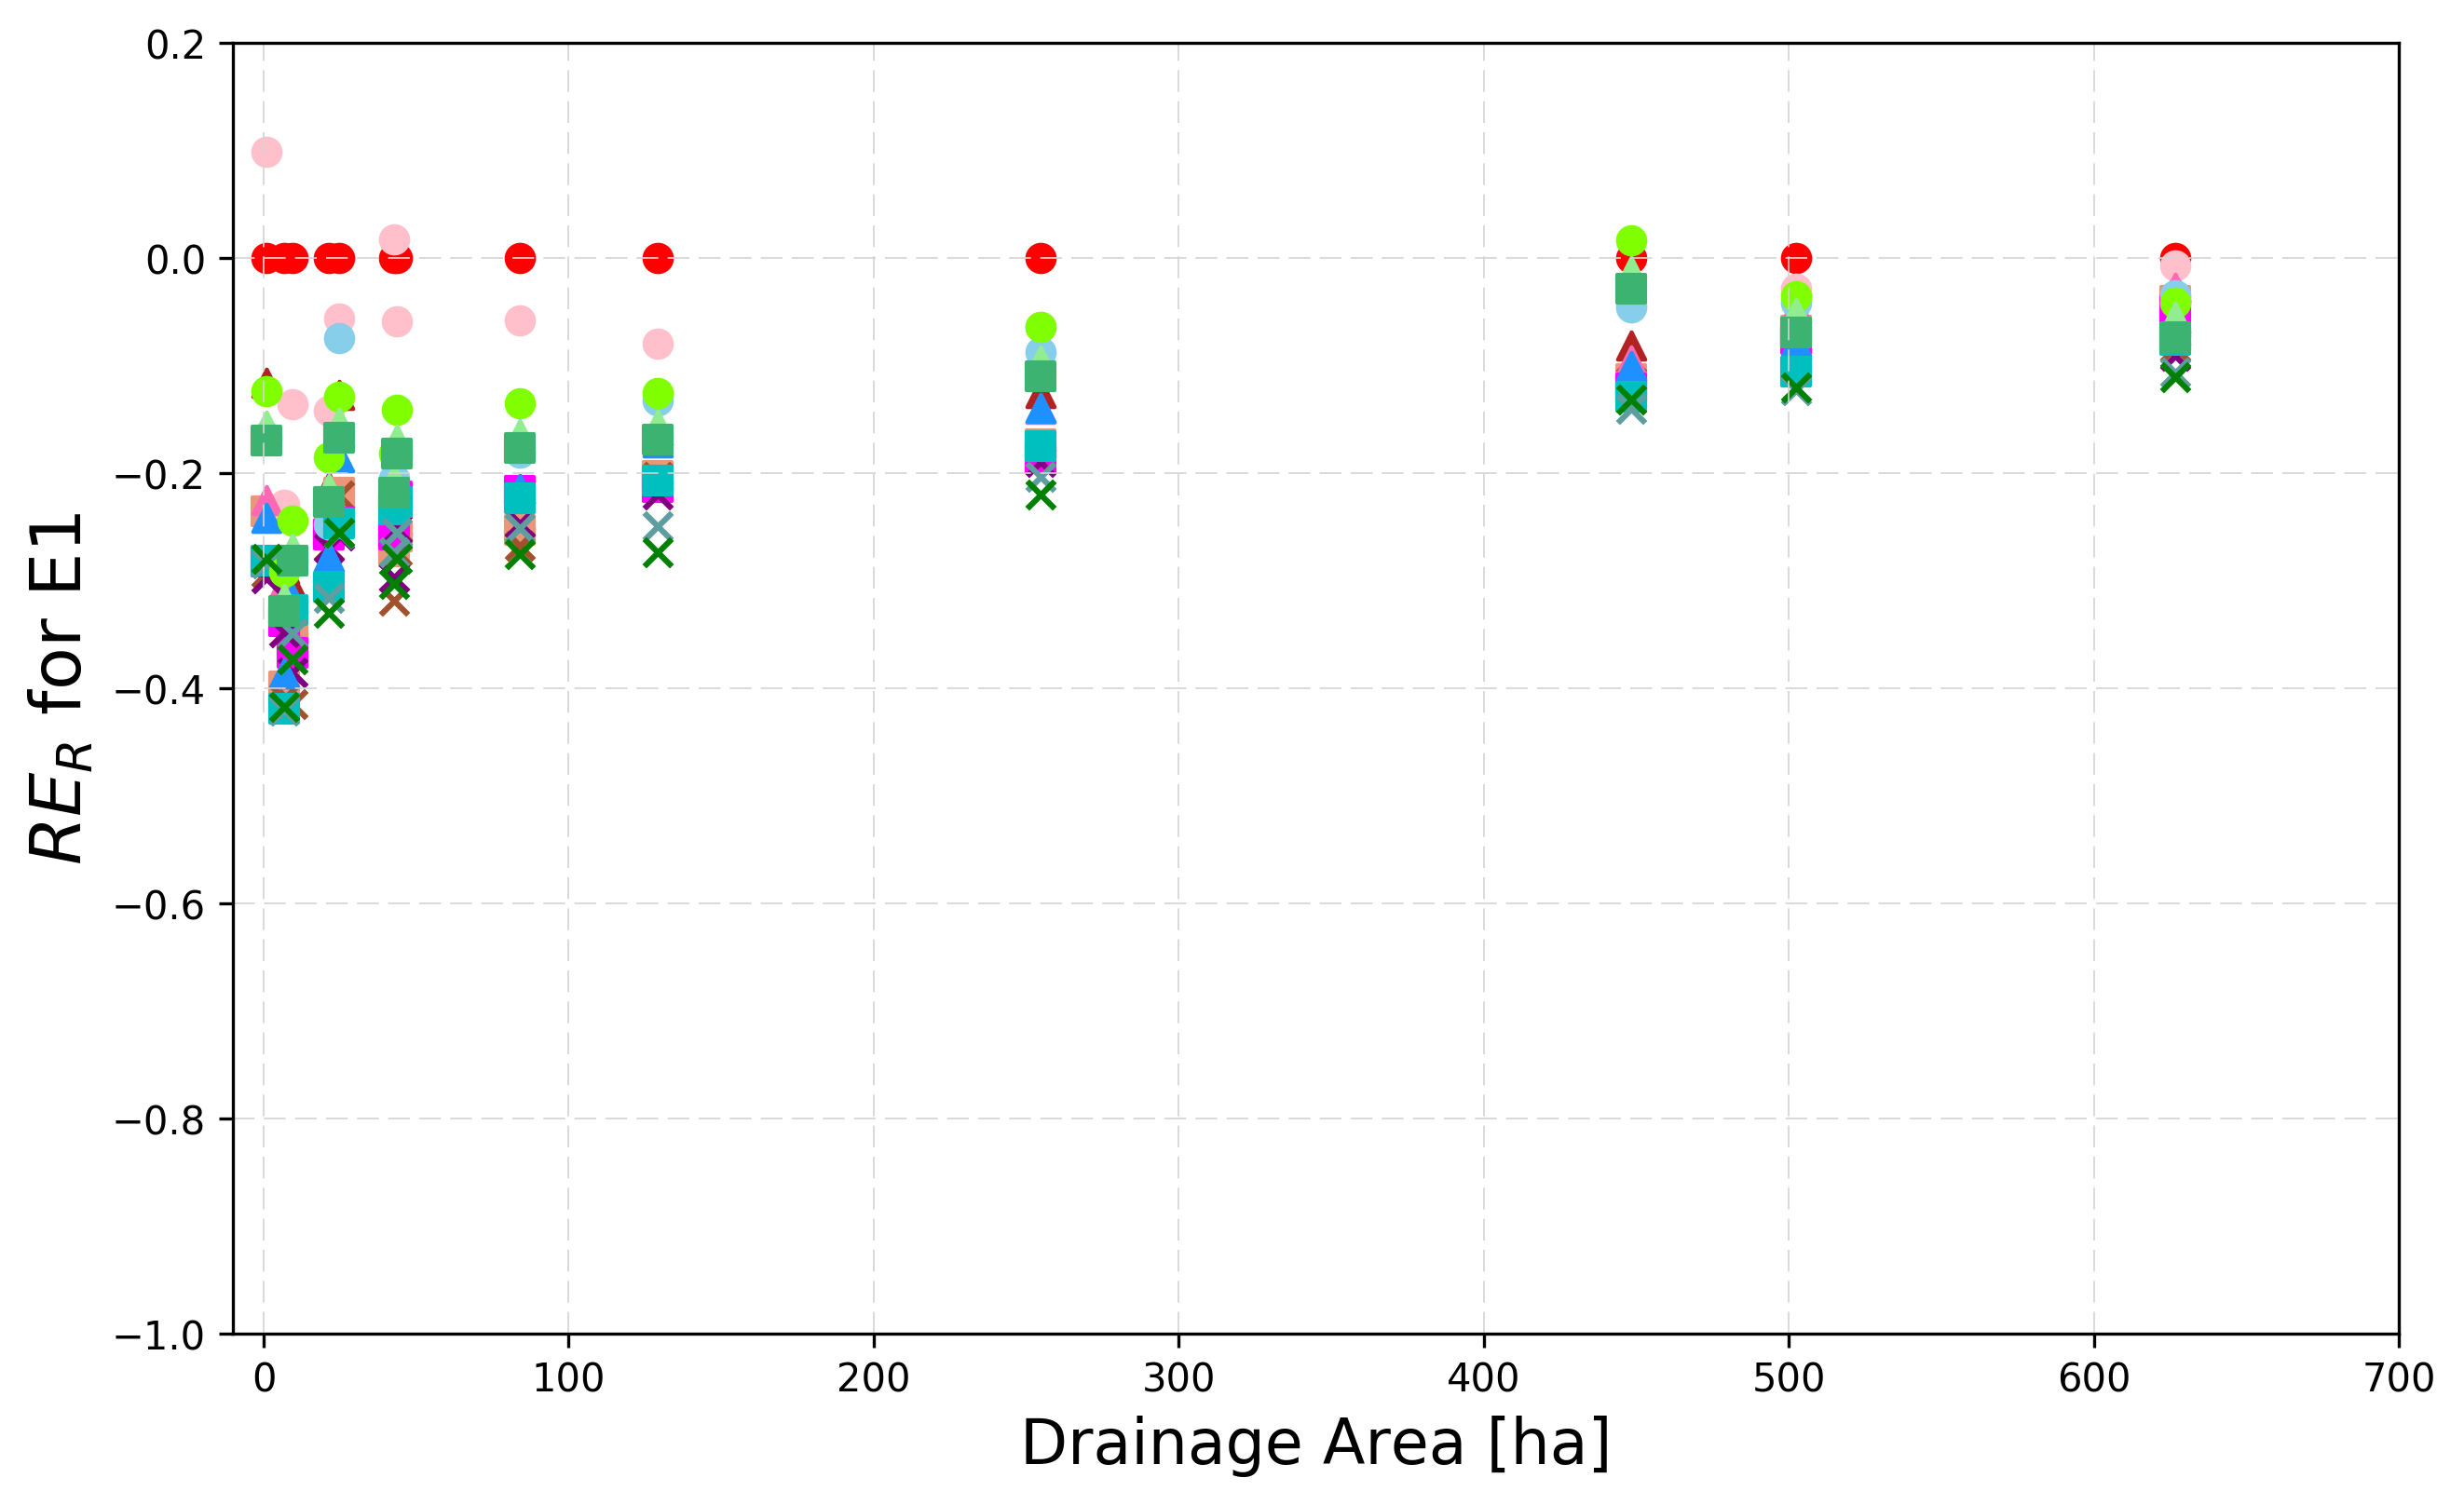

Supplement: Supplementary file 1 [file hess-22-2425-2018-supplement.zip › Rainfall/WA2_rainfall_RE_E1.png]

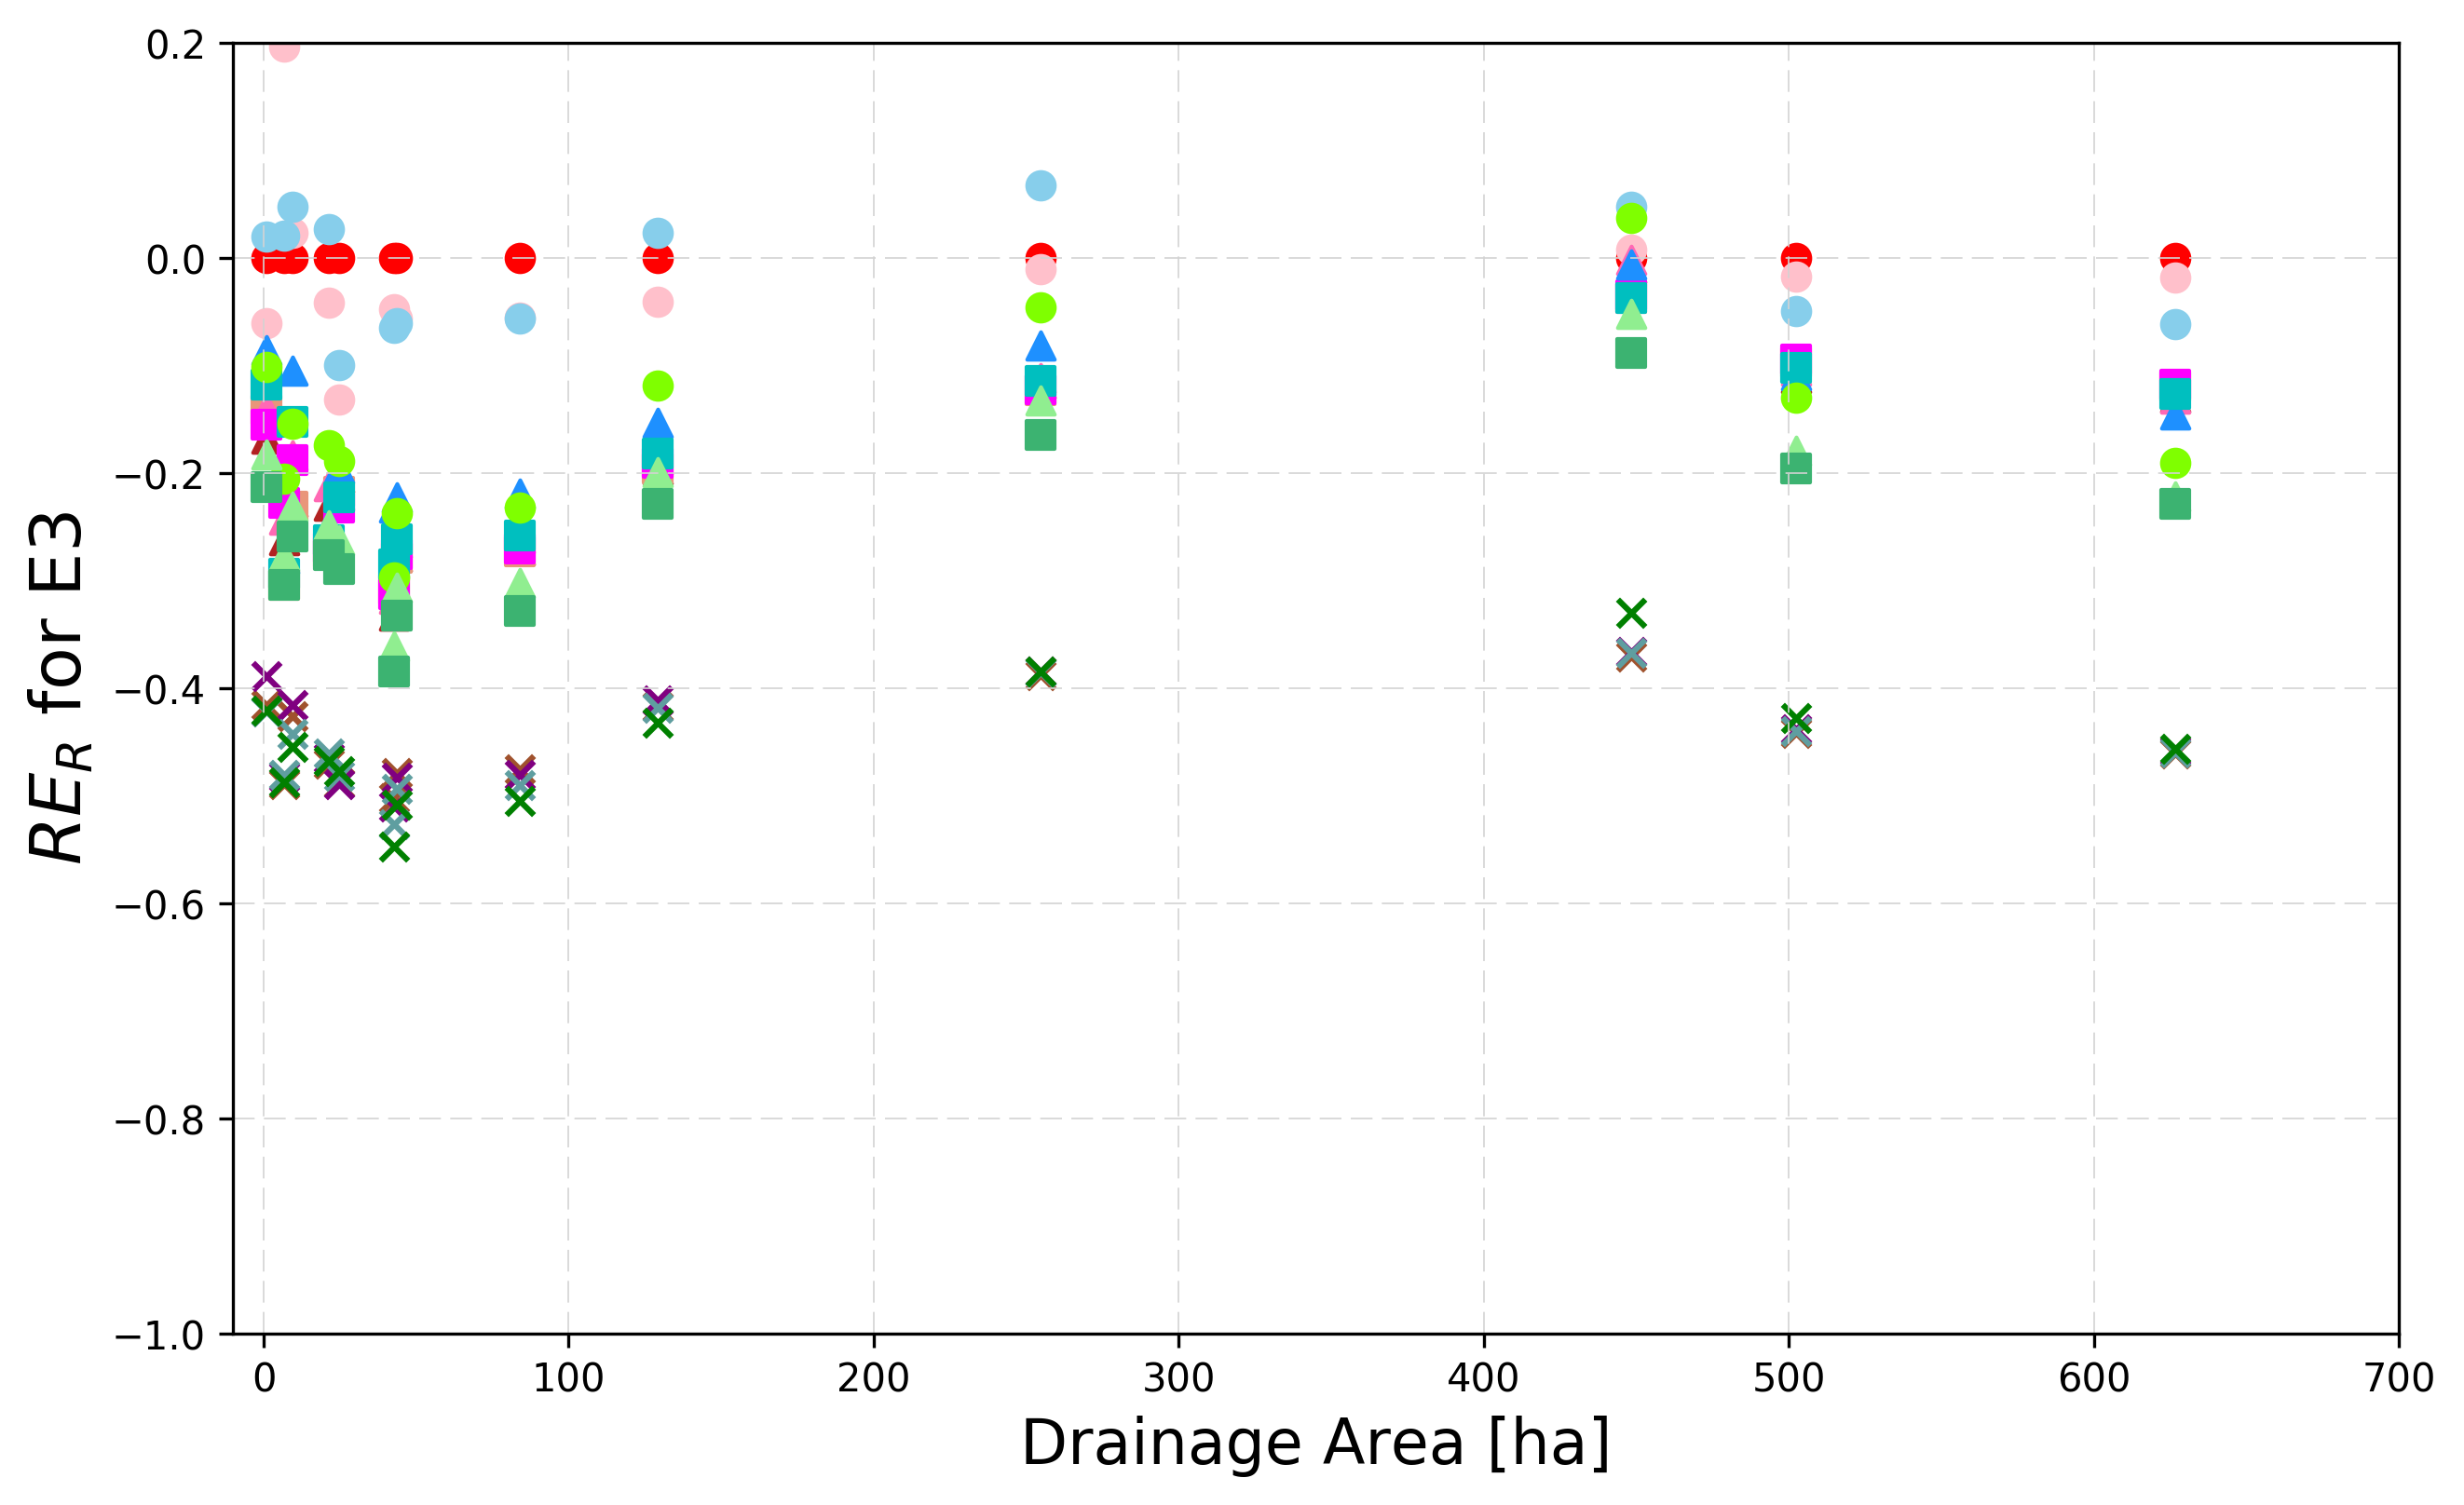

Supplement: Supplementary file 1 [file hess-22-2425-2018-supplement.zip › Rainfall/WA2_rainfall_RE_E3.png]

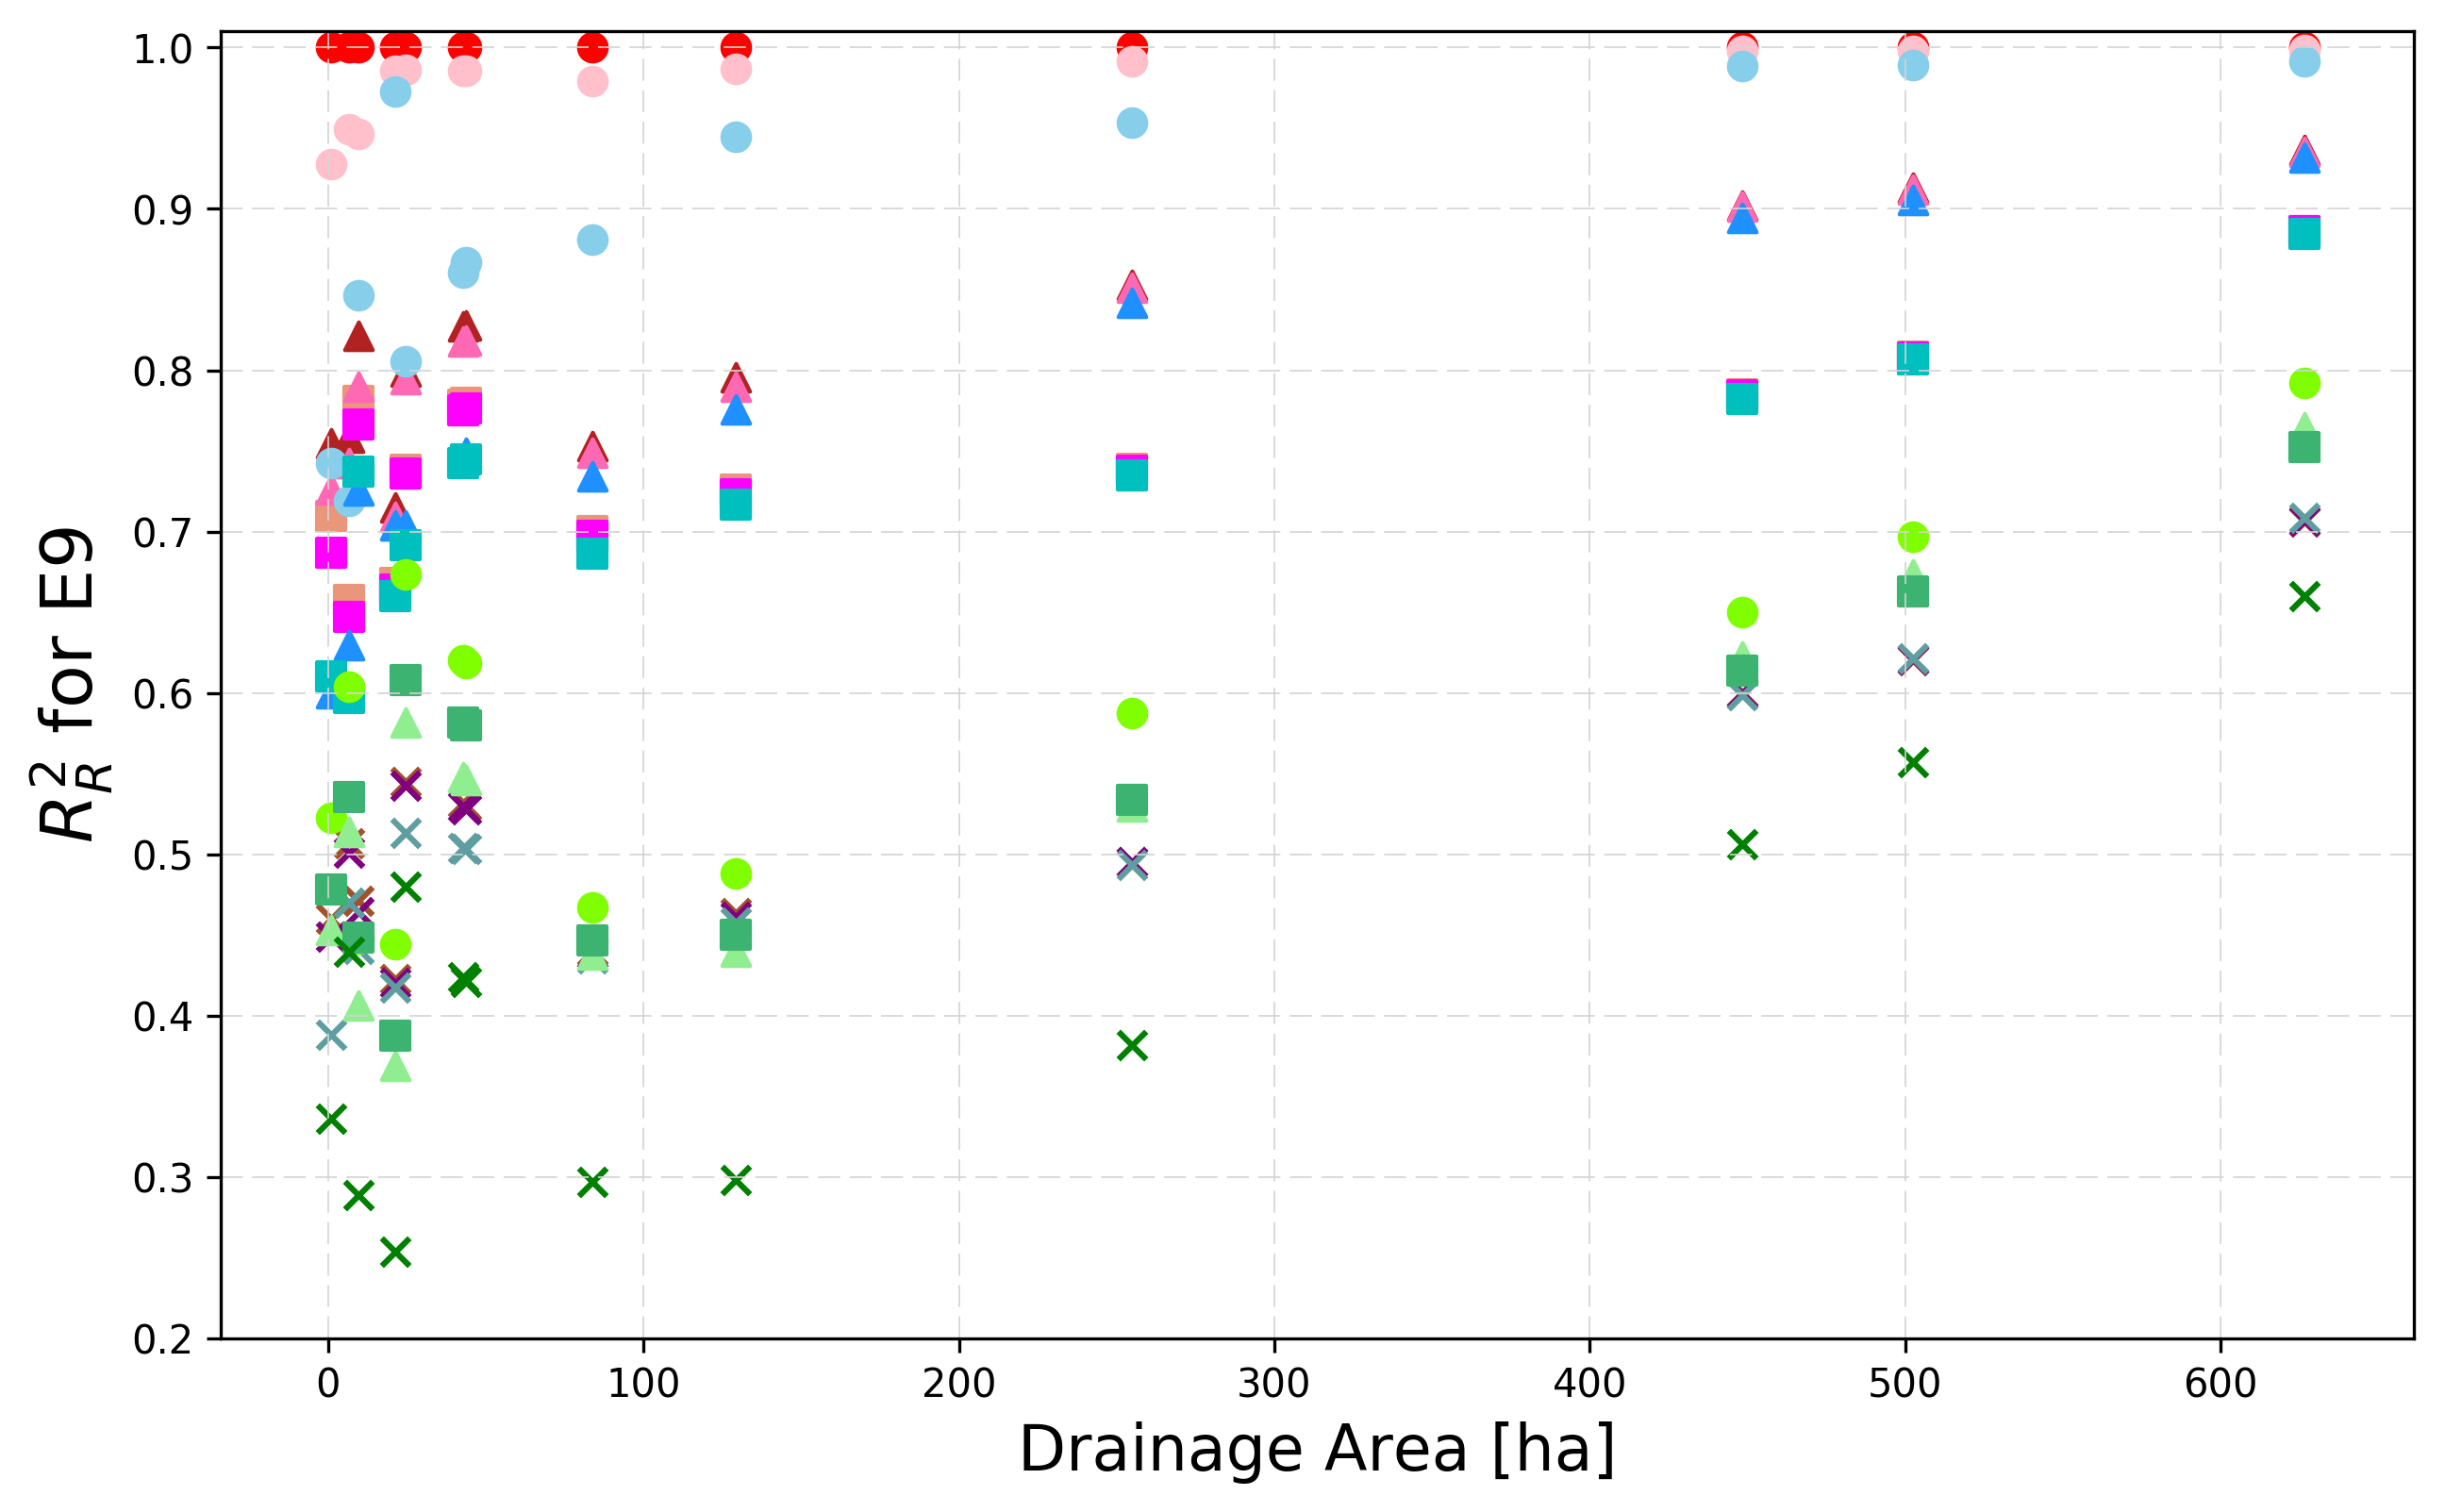

Supplement: Supplementary file 1 [file hess-22-2425-2018-supplement.zip › Rainfall/WA2_rainfall_R2_E9.png]

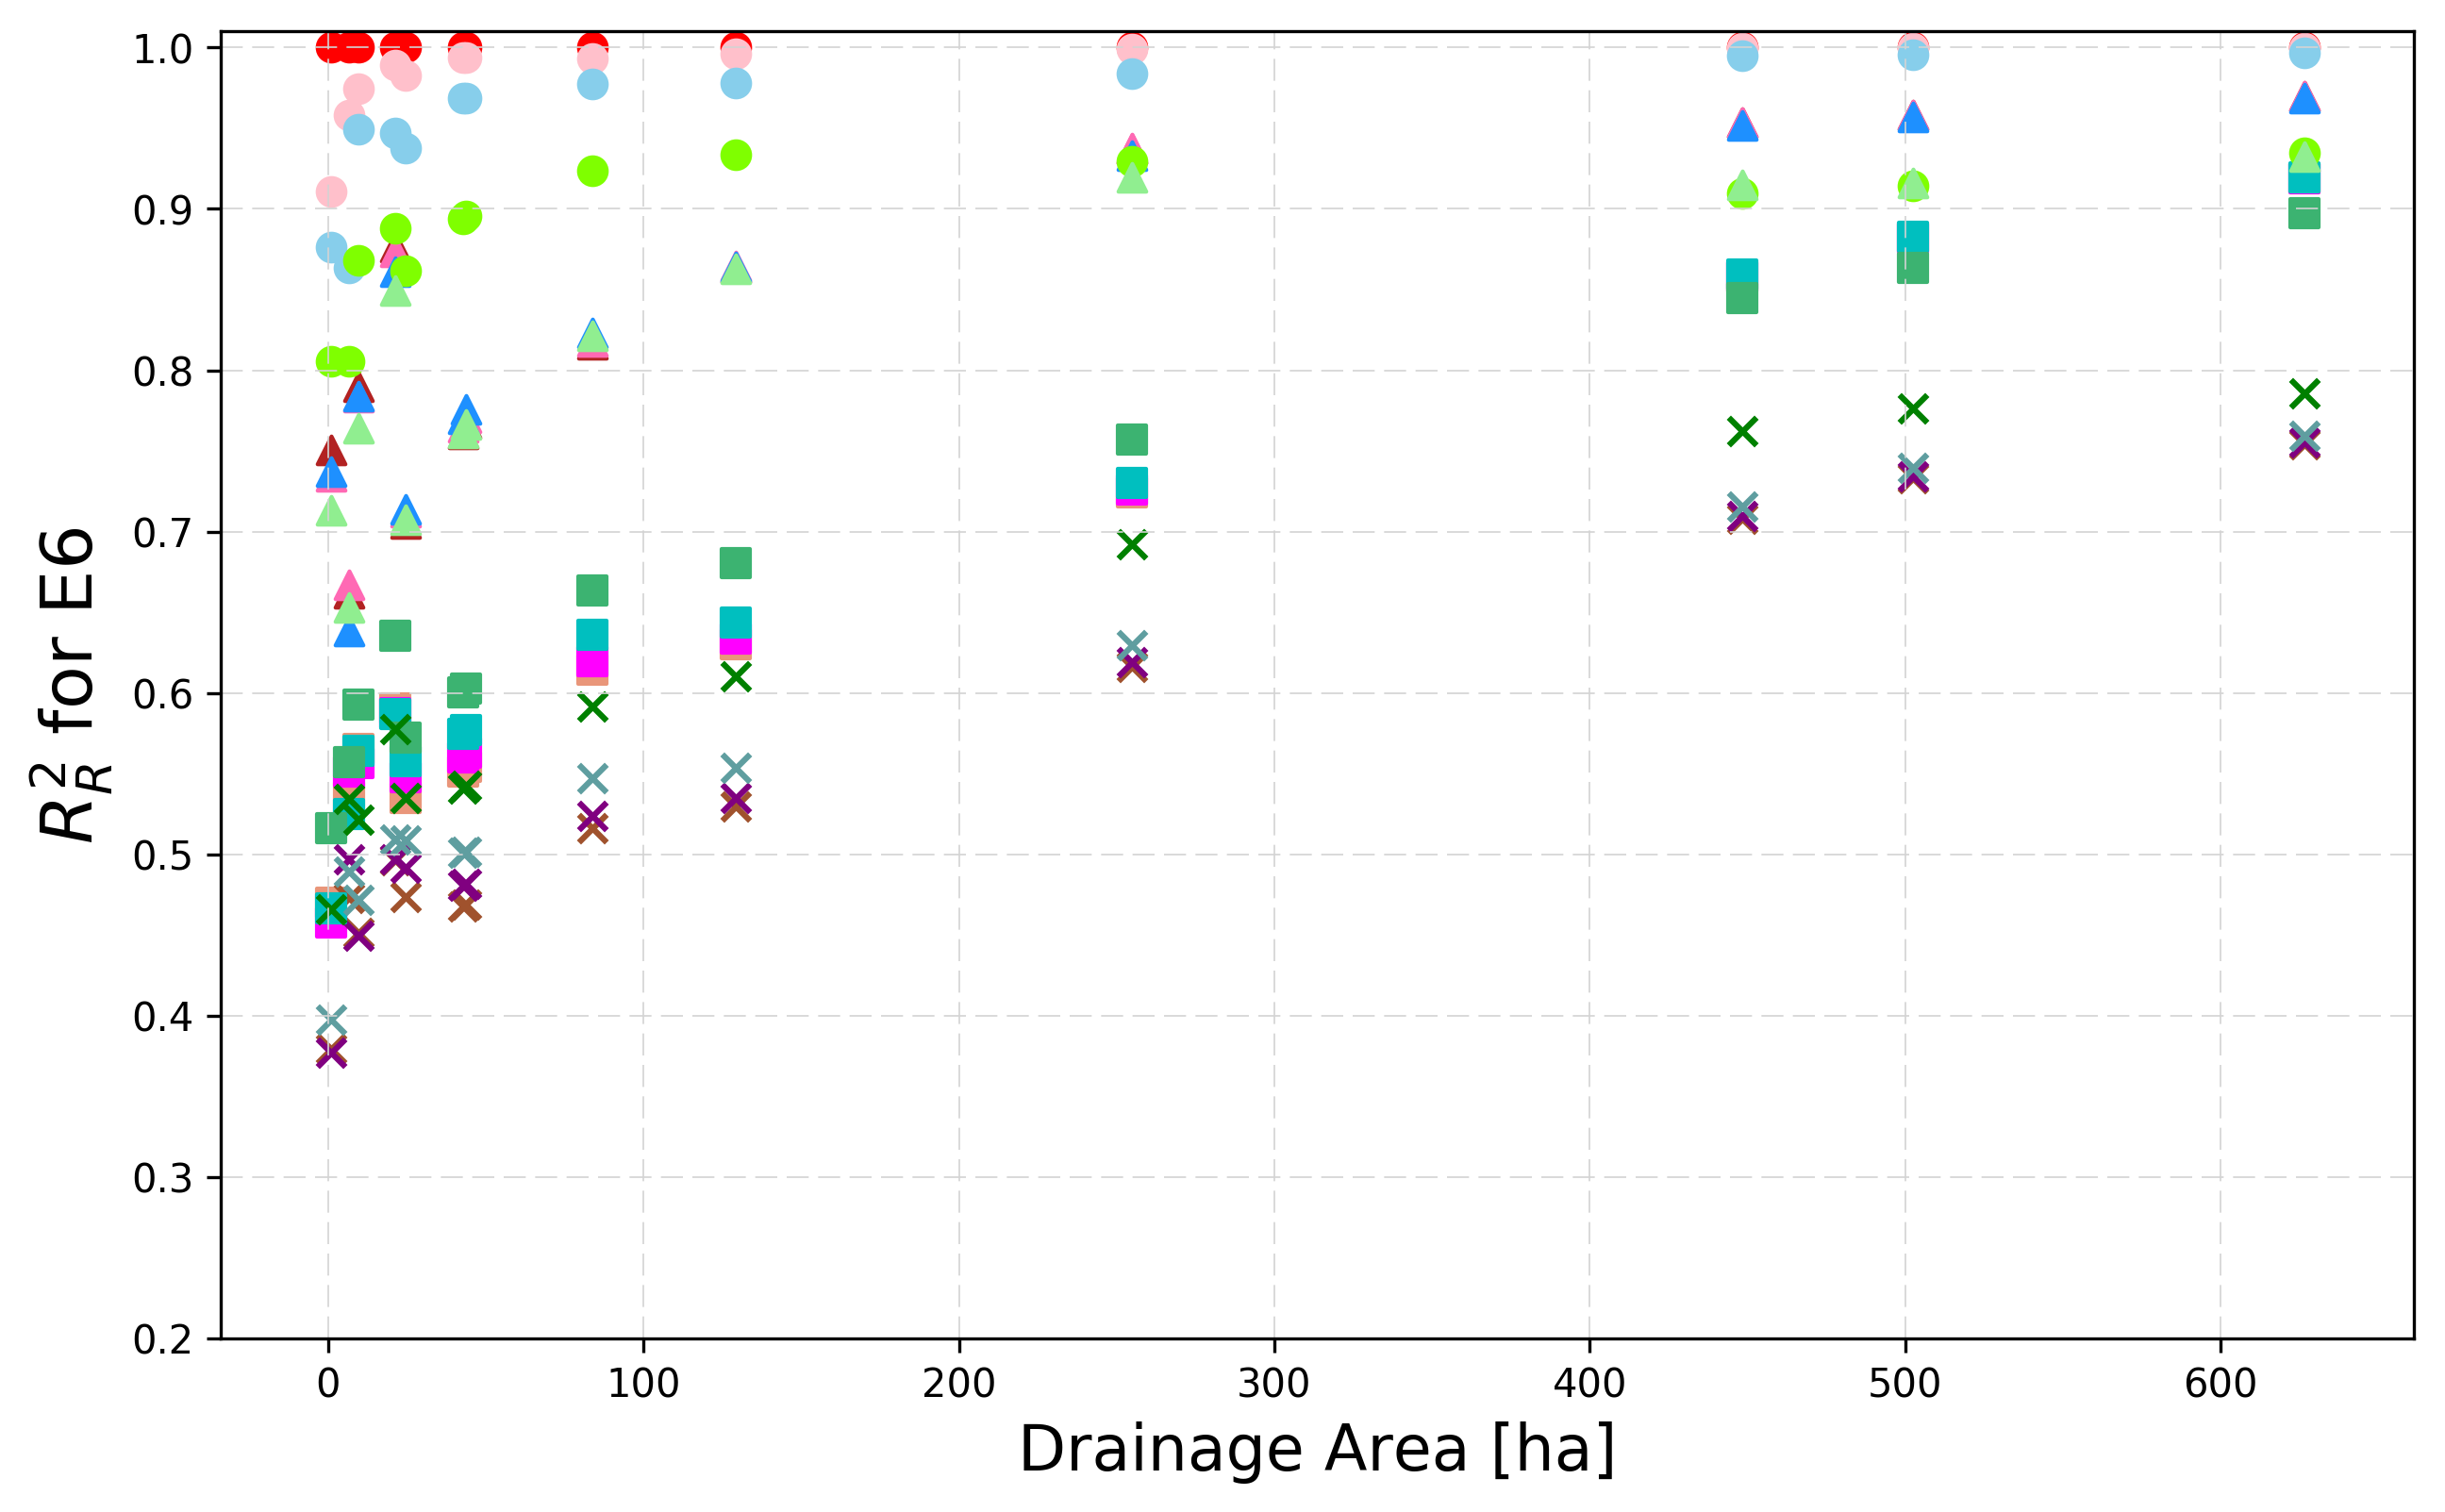

Supplement: Supplementary file 1 [file hess-22-2425-2018-supplement.zip › Rainfall/WA2_rainfall_R2_E6.png]

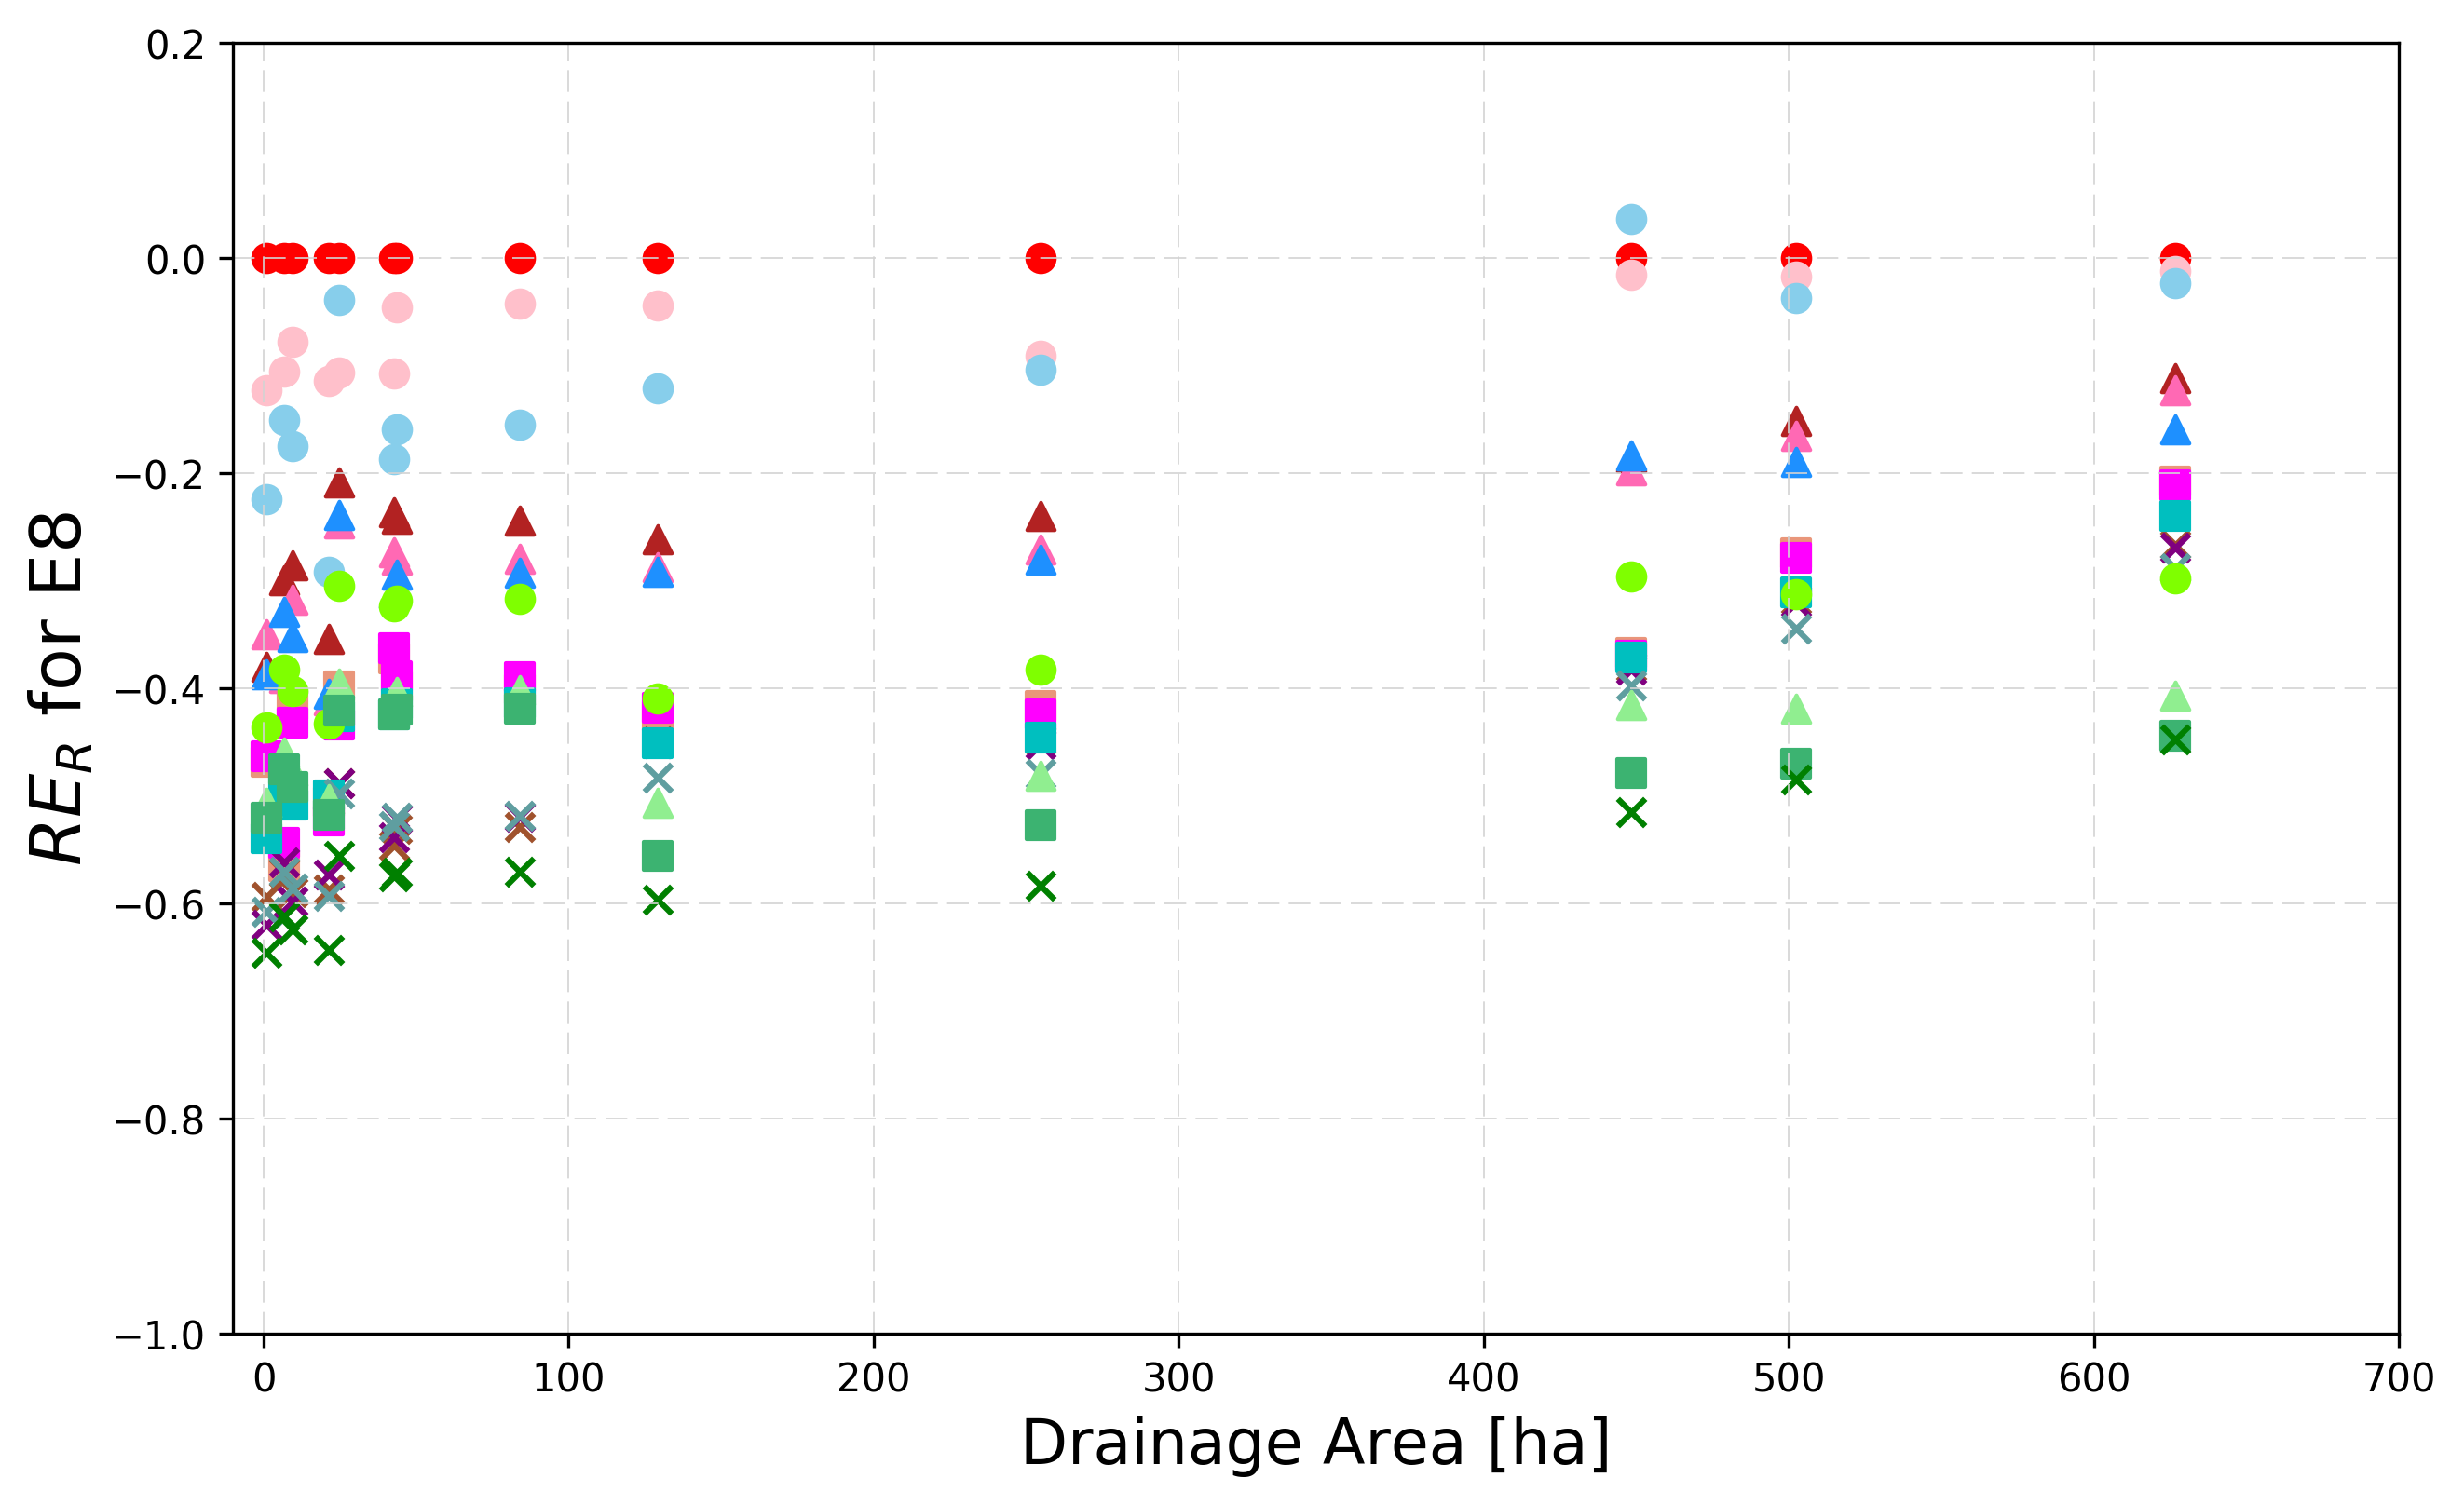

Supplement: Supplementary file 1 [file hess-22-2425-2018-supplement.zip › Rainfall/WA2_rainfall_RE_E8.png]

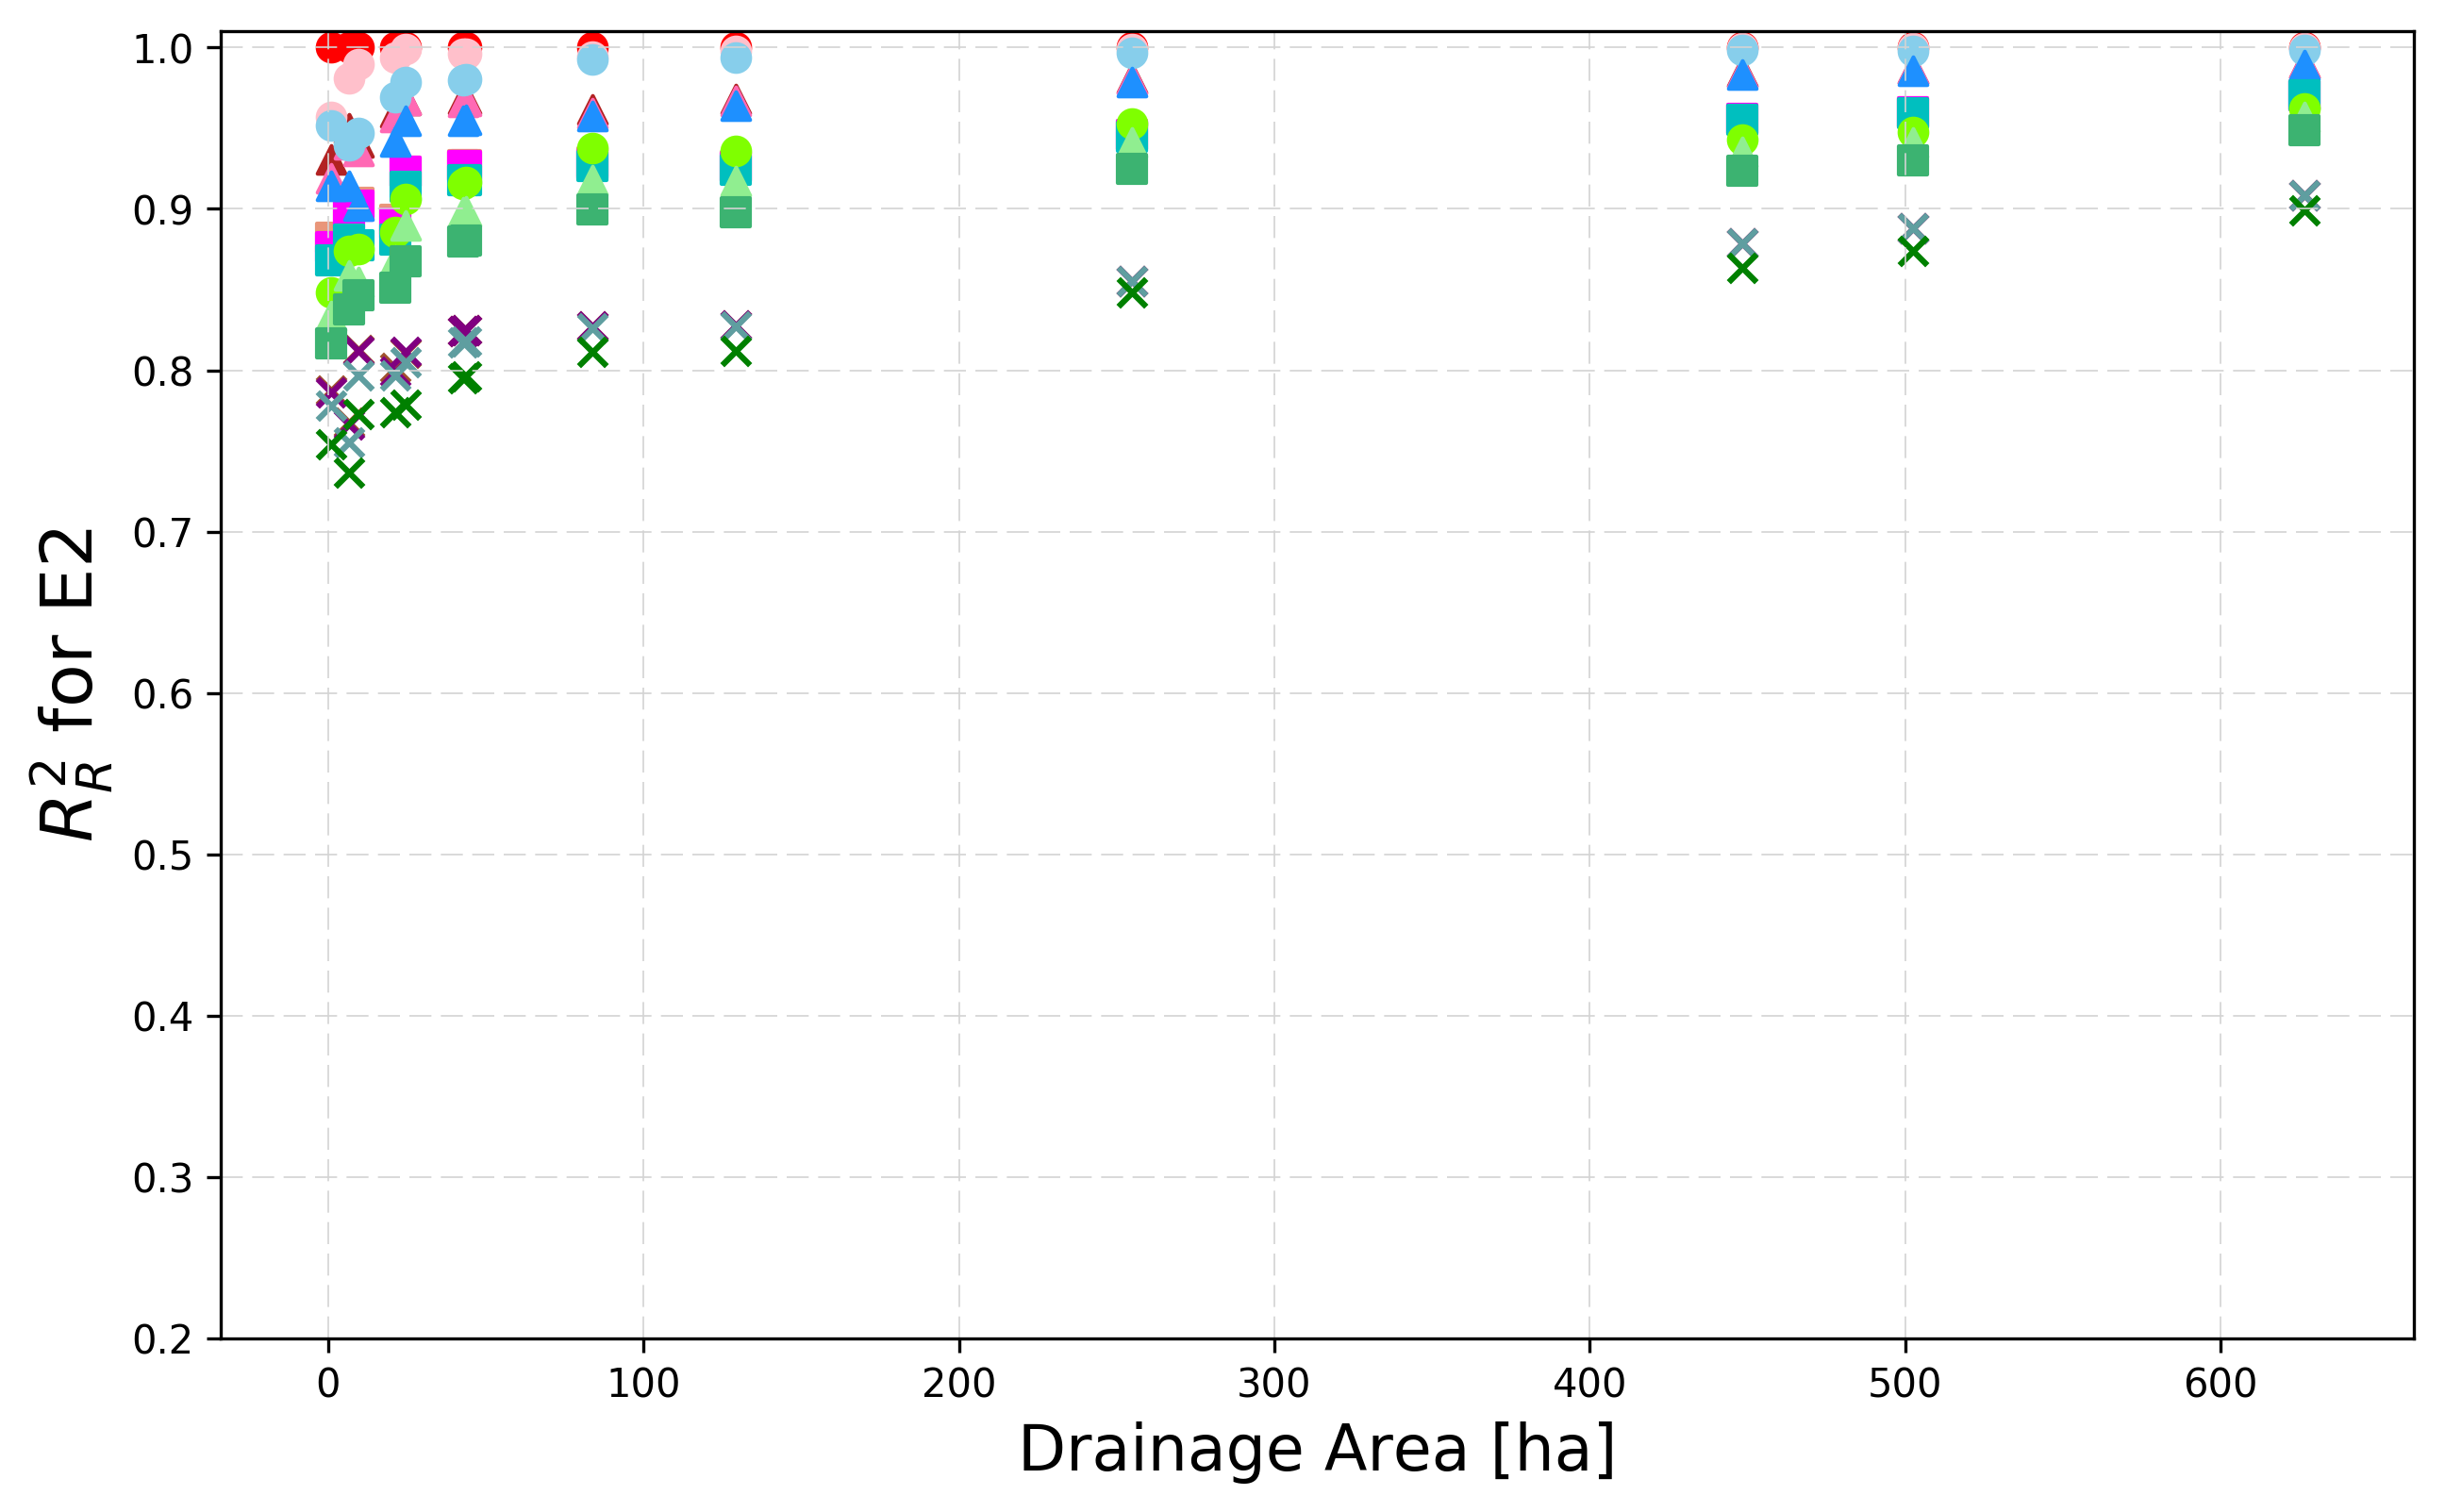

Supplement: Supplementary file 1 [file hess-22-2425-2018-supplement.zip › Rainfall/WA2_rainfall_R2_E2.png]

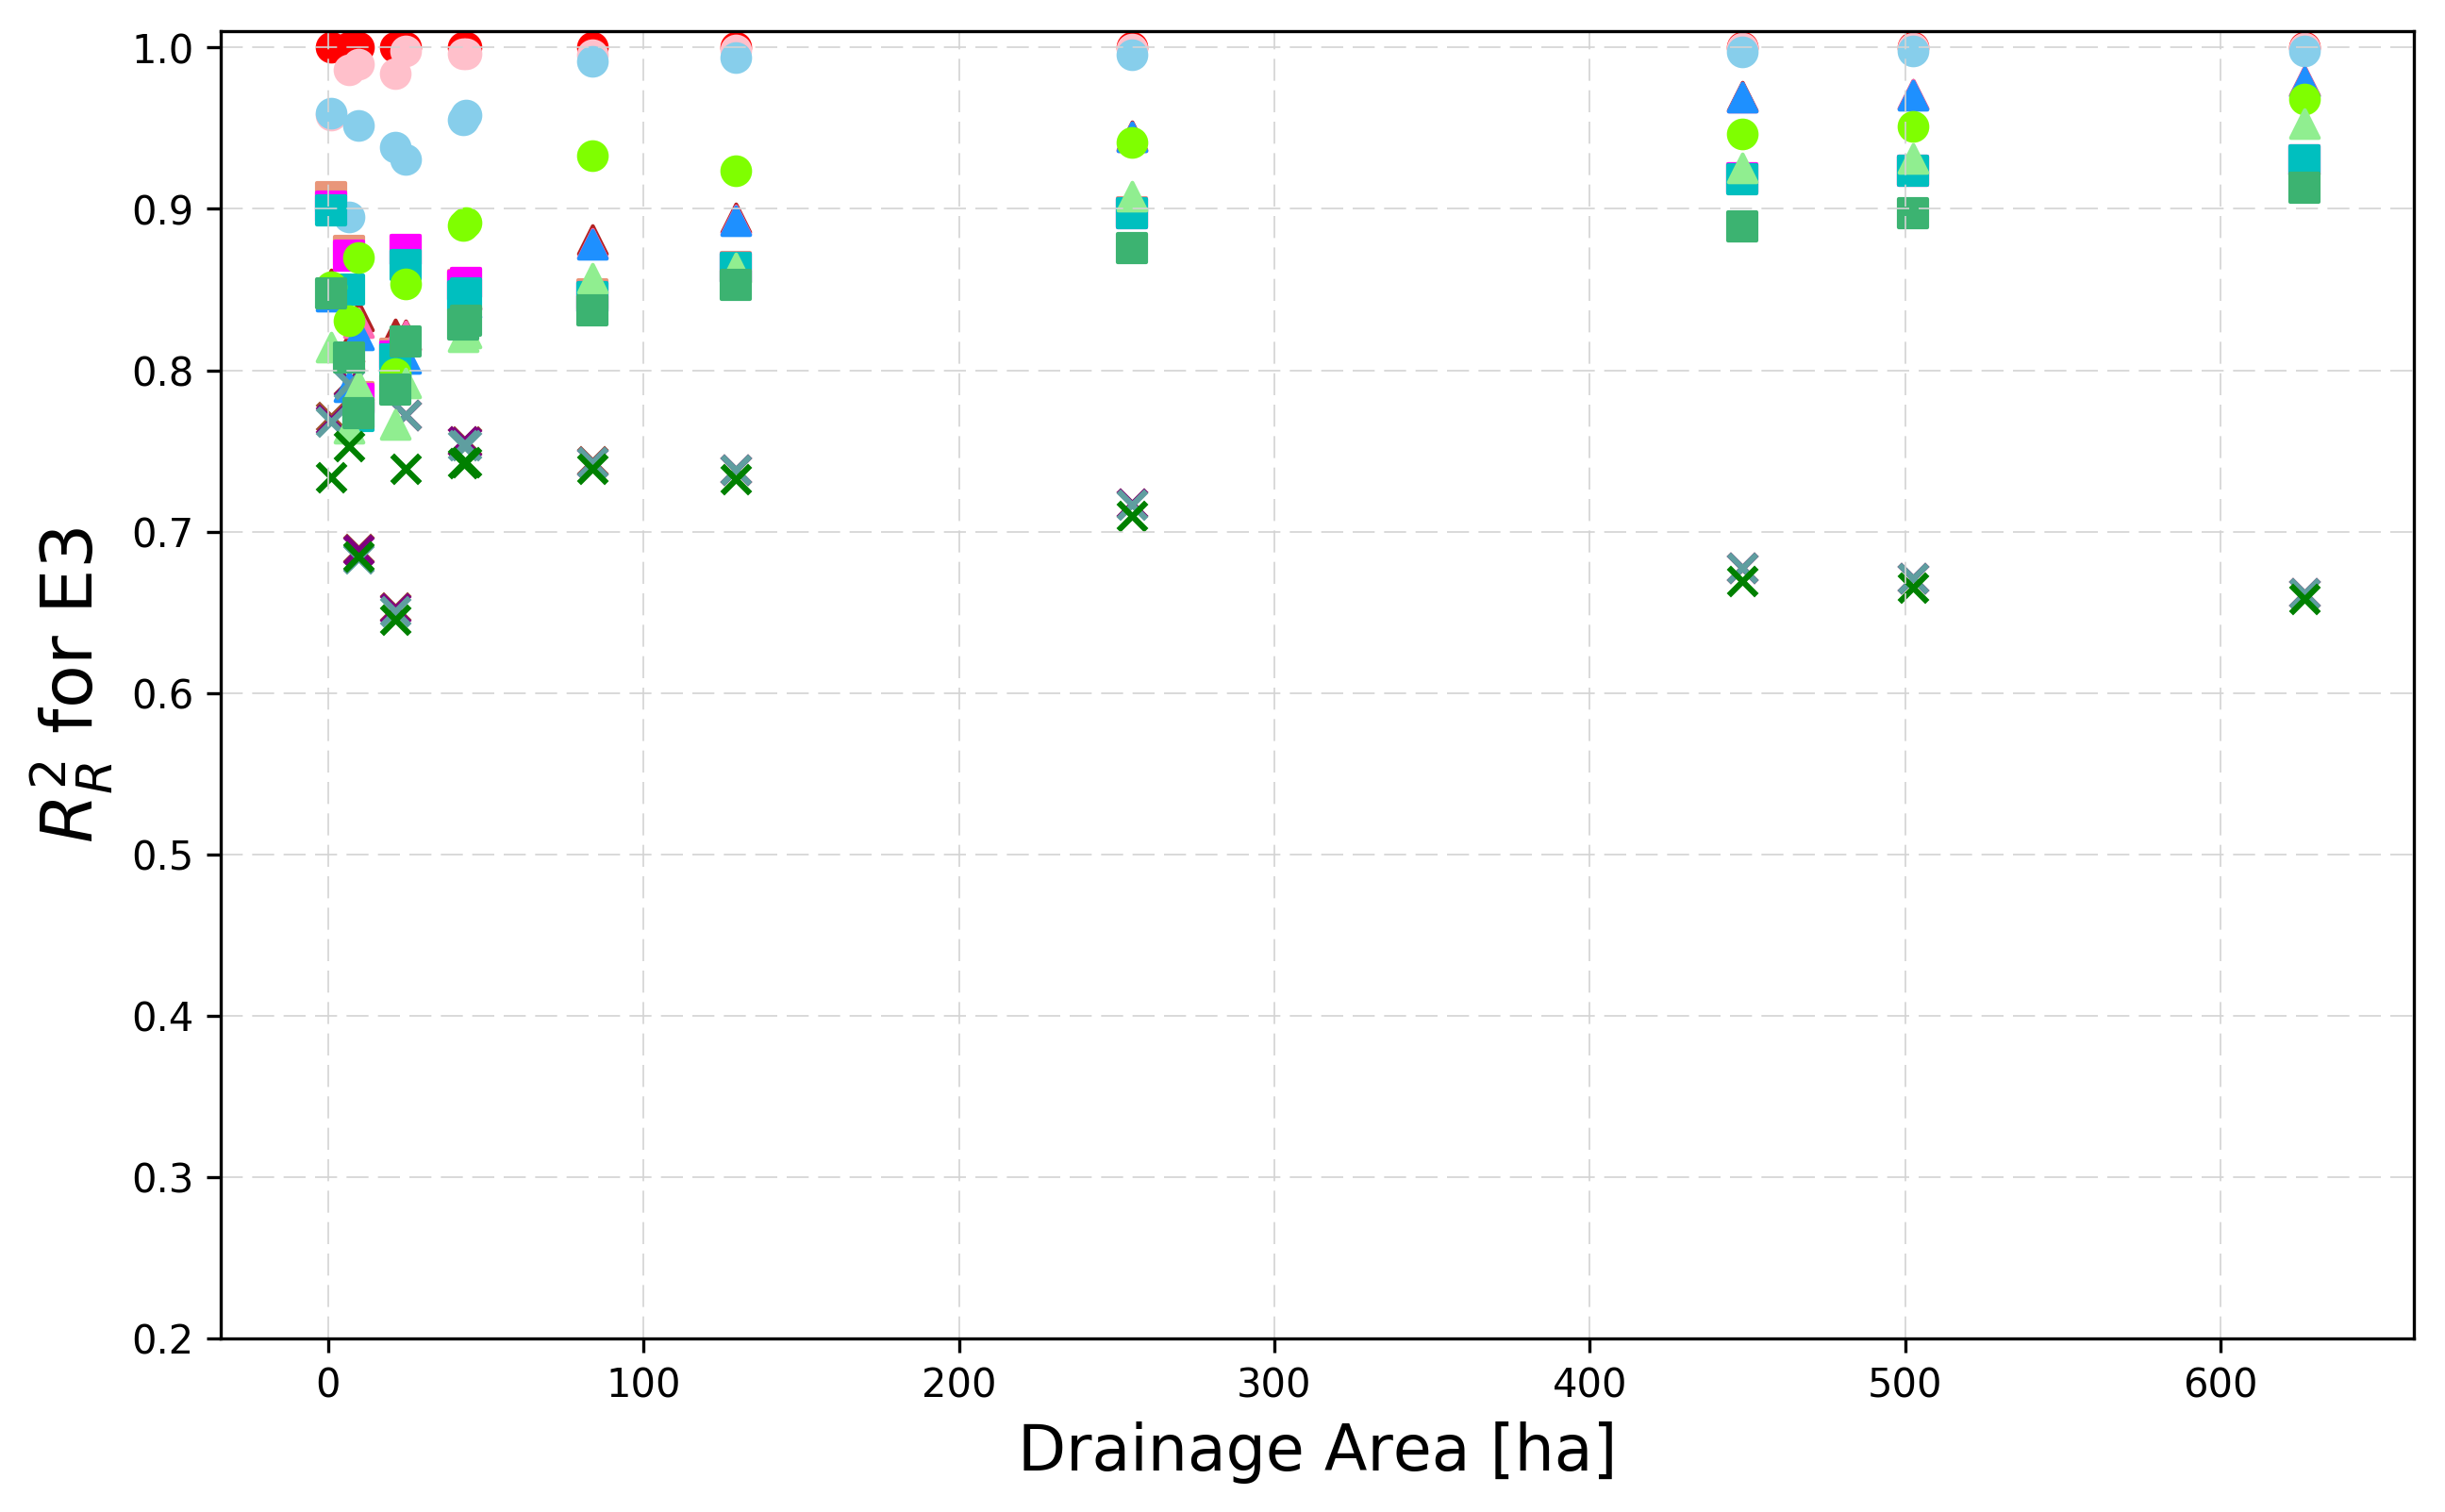

Supplement: Supplementary file 1 [file hess-22-2425-2018-supplement.zip › Rainfall/WA2_rainfall_R2_E3.png]

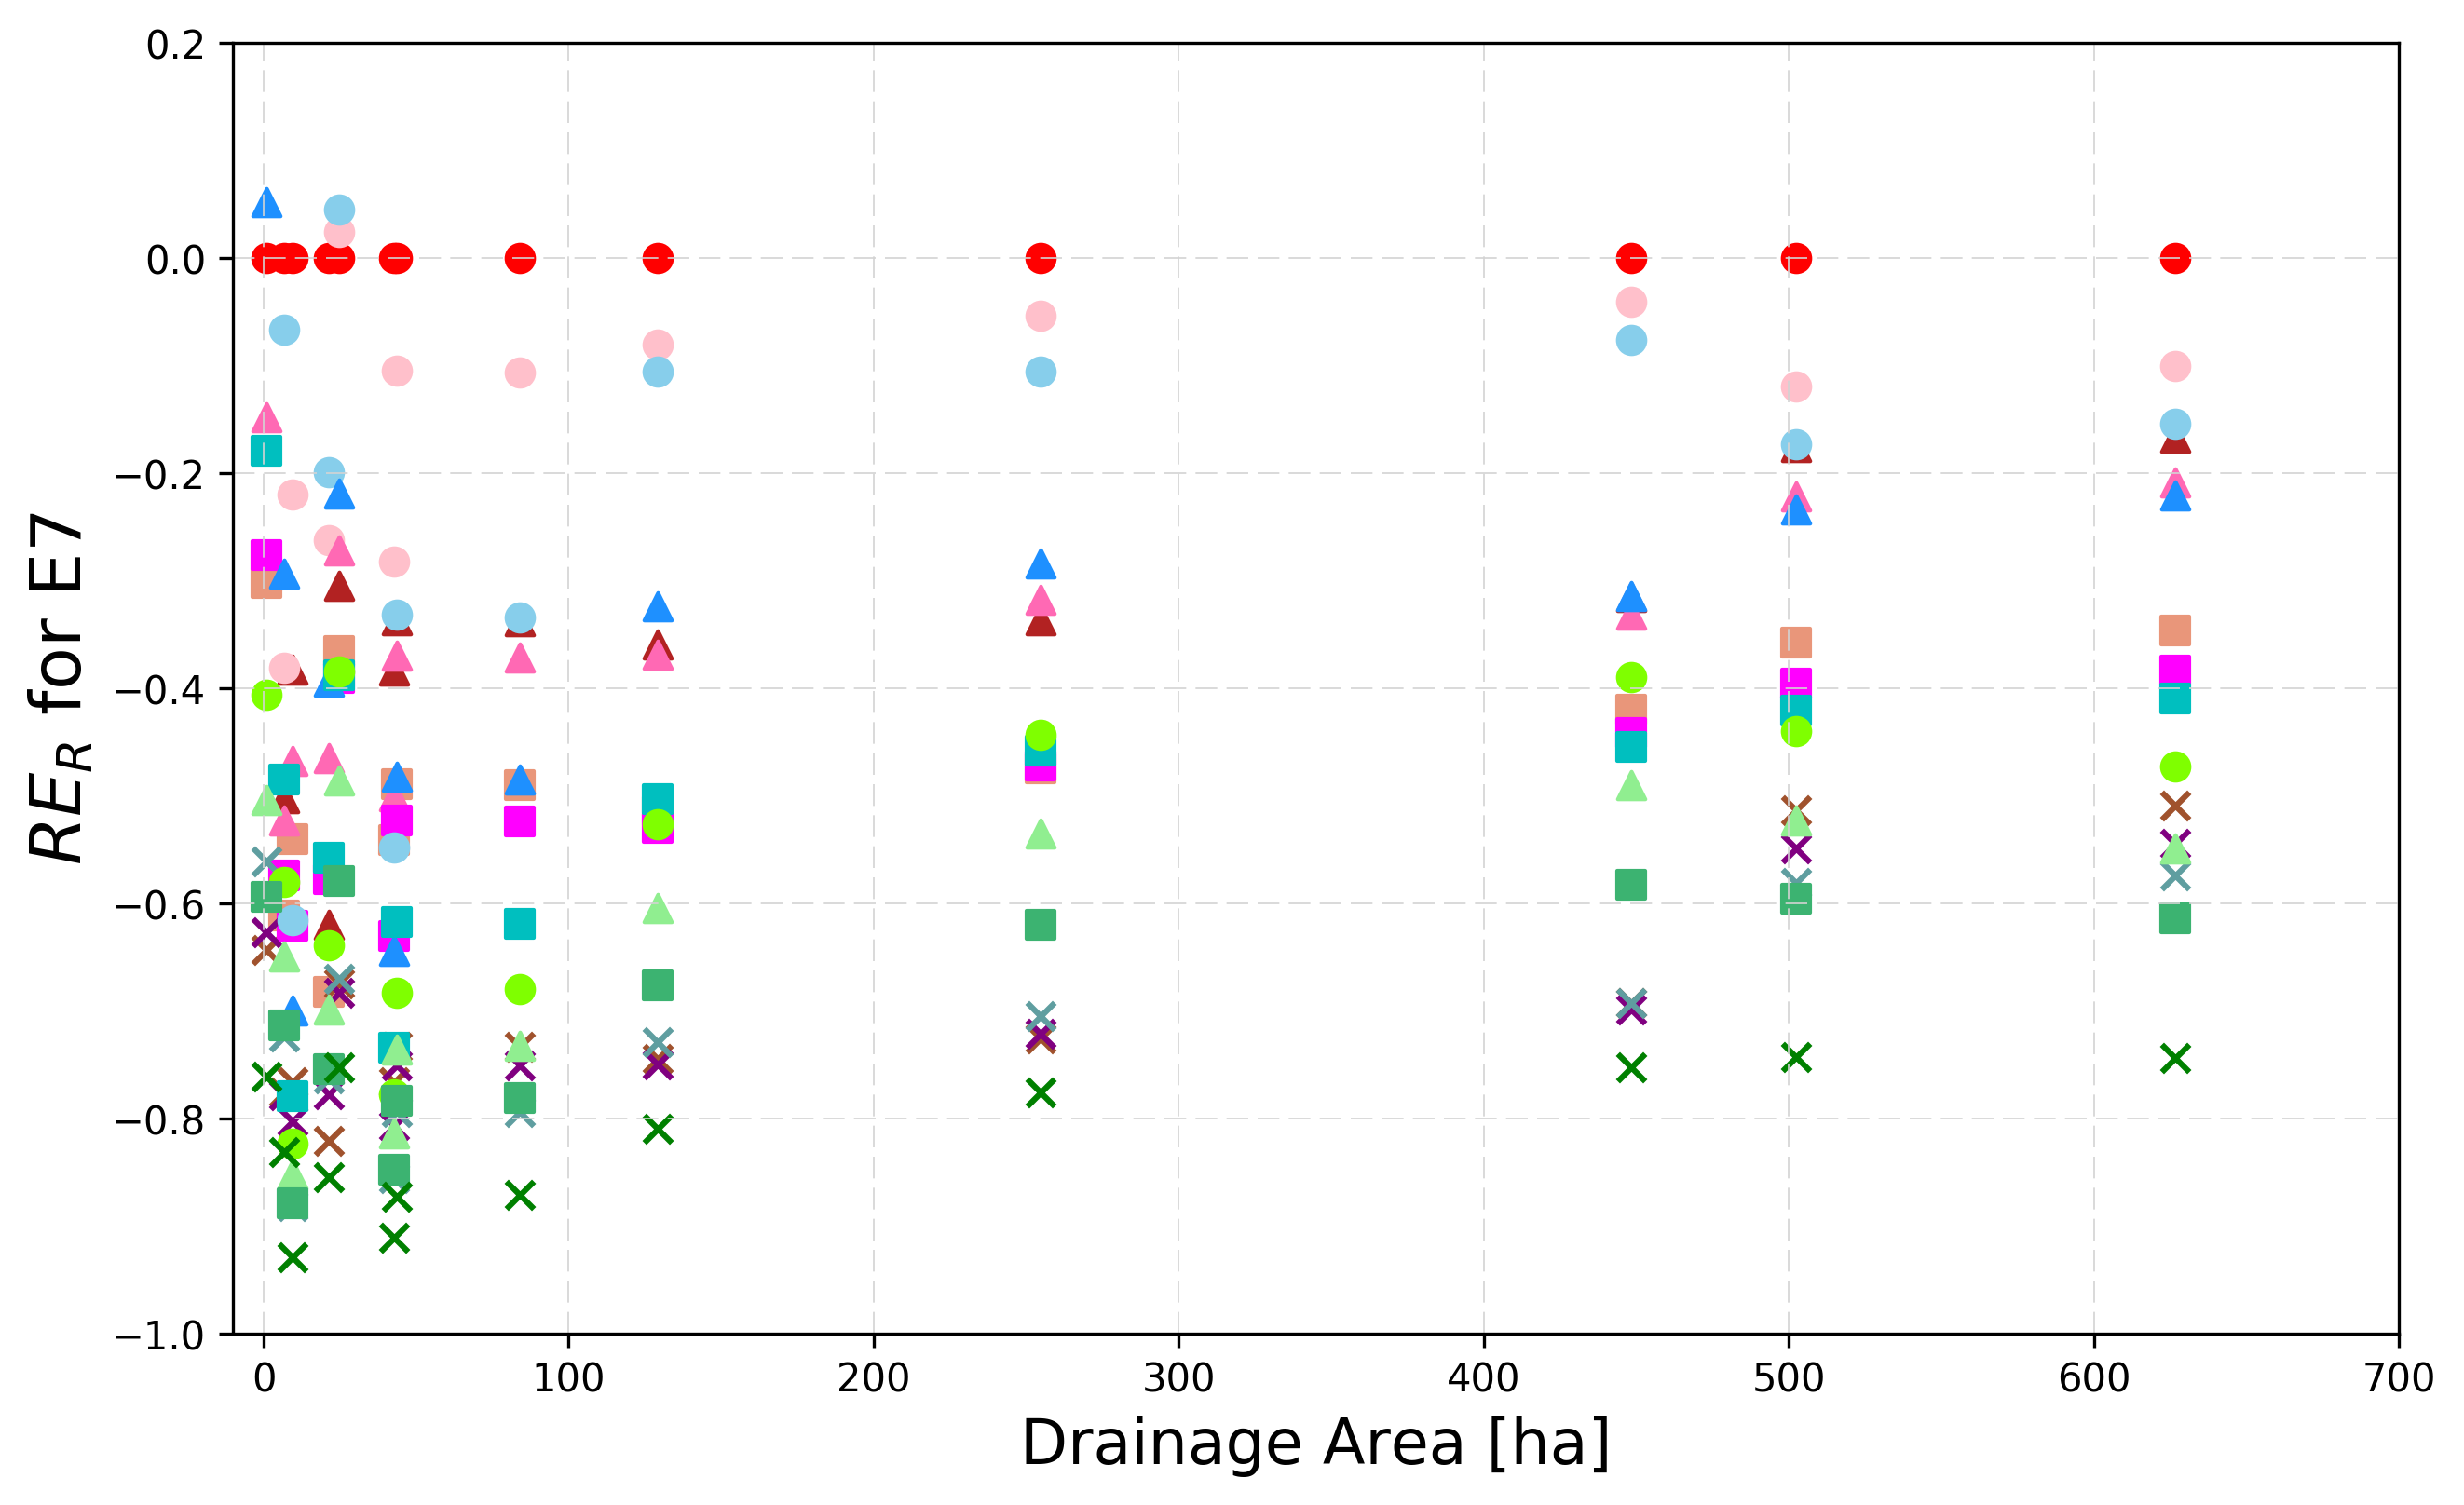

Supplement: Supplementary file 1 [file hess-22-2425-2018-supplement.zip › Rainfall/WA2_rainfall_RE_E7.png]

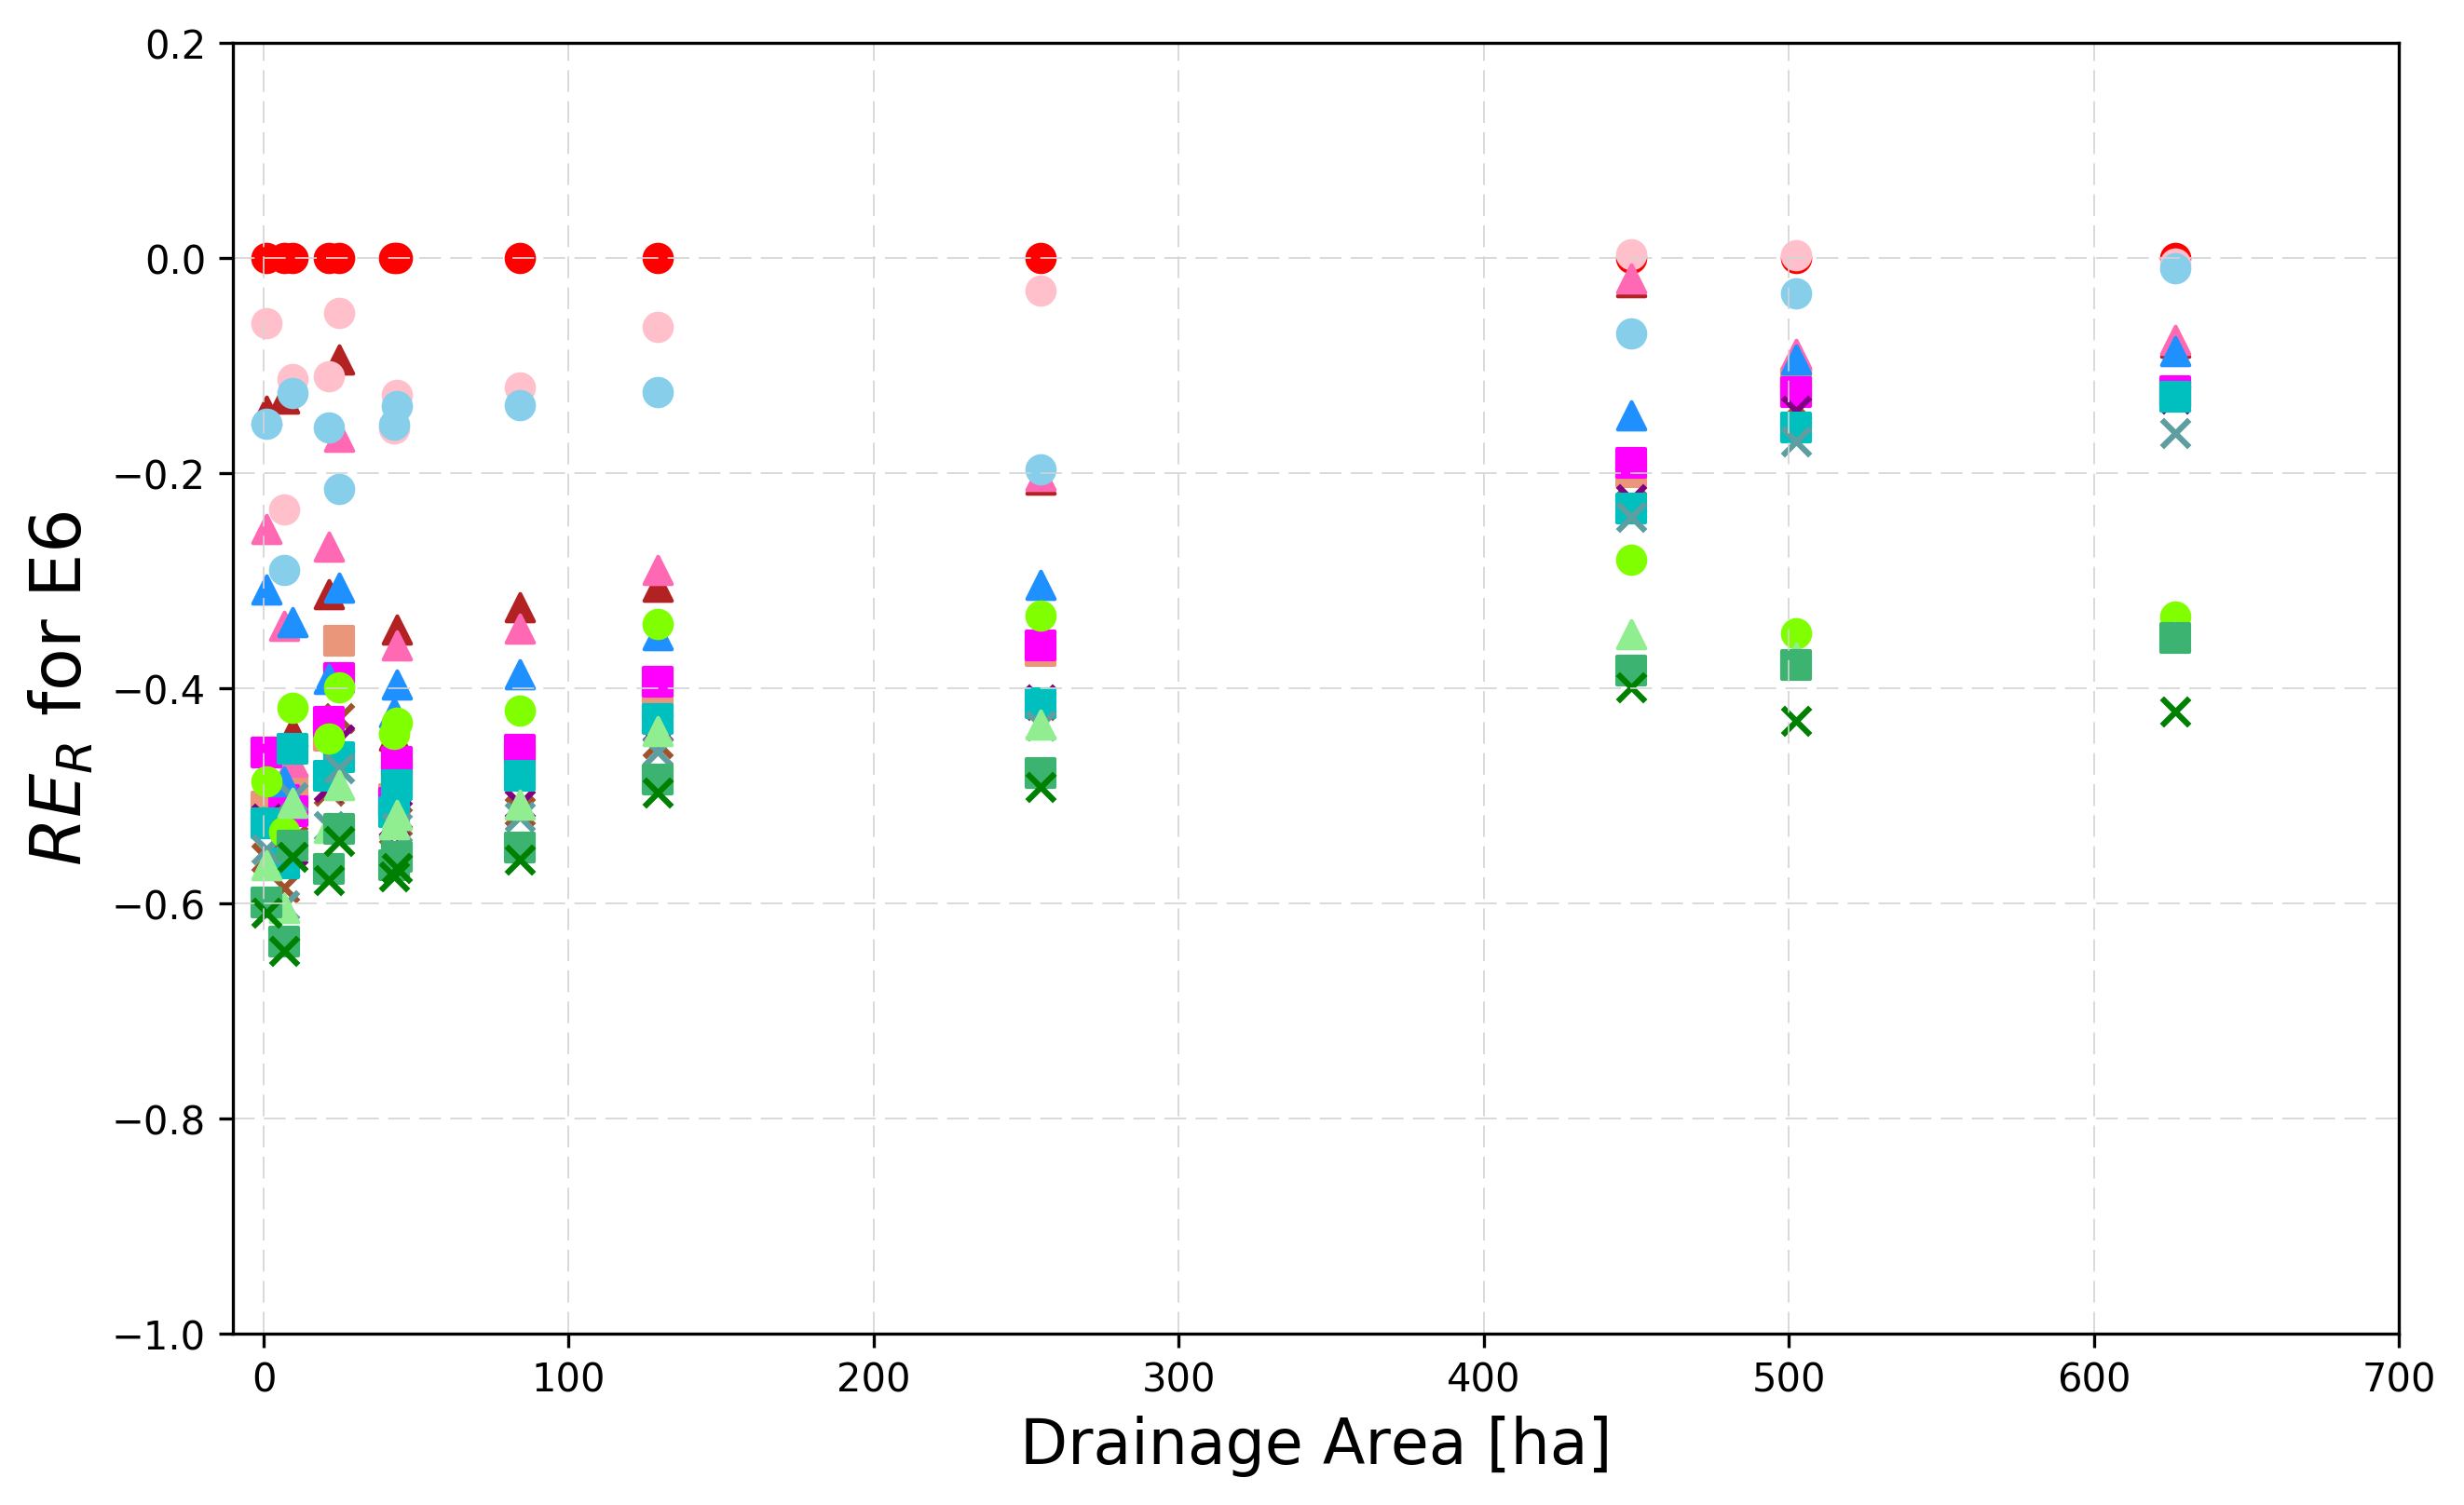

Supplement: Supplementary file 1 [file hess-22-2425-2018-supplement.zip › Rainfall/WA2_rainfall_RE_E6.png]

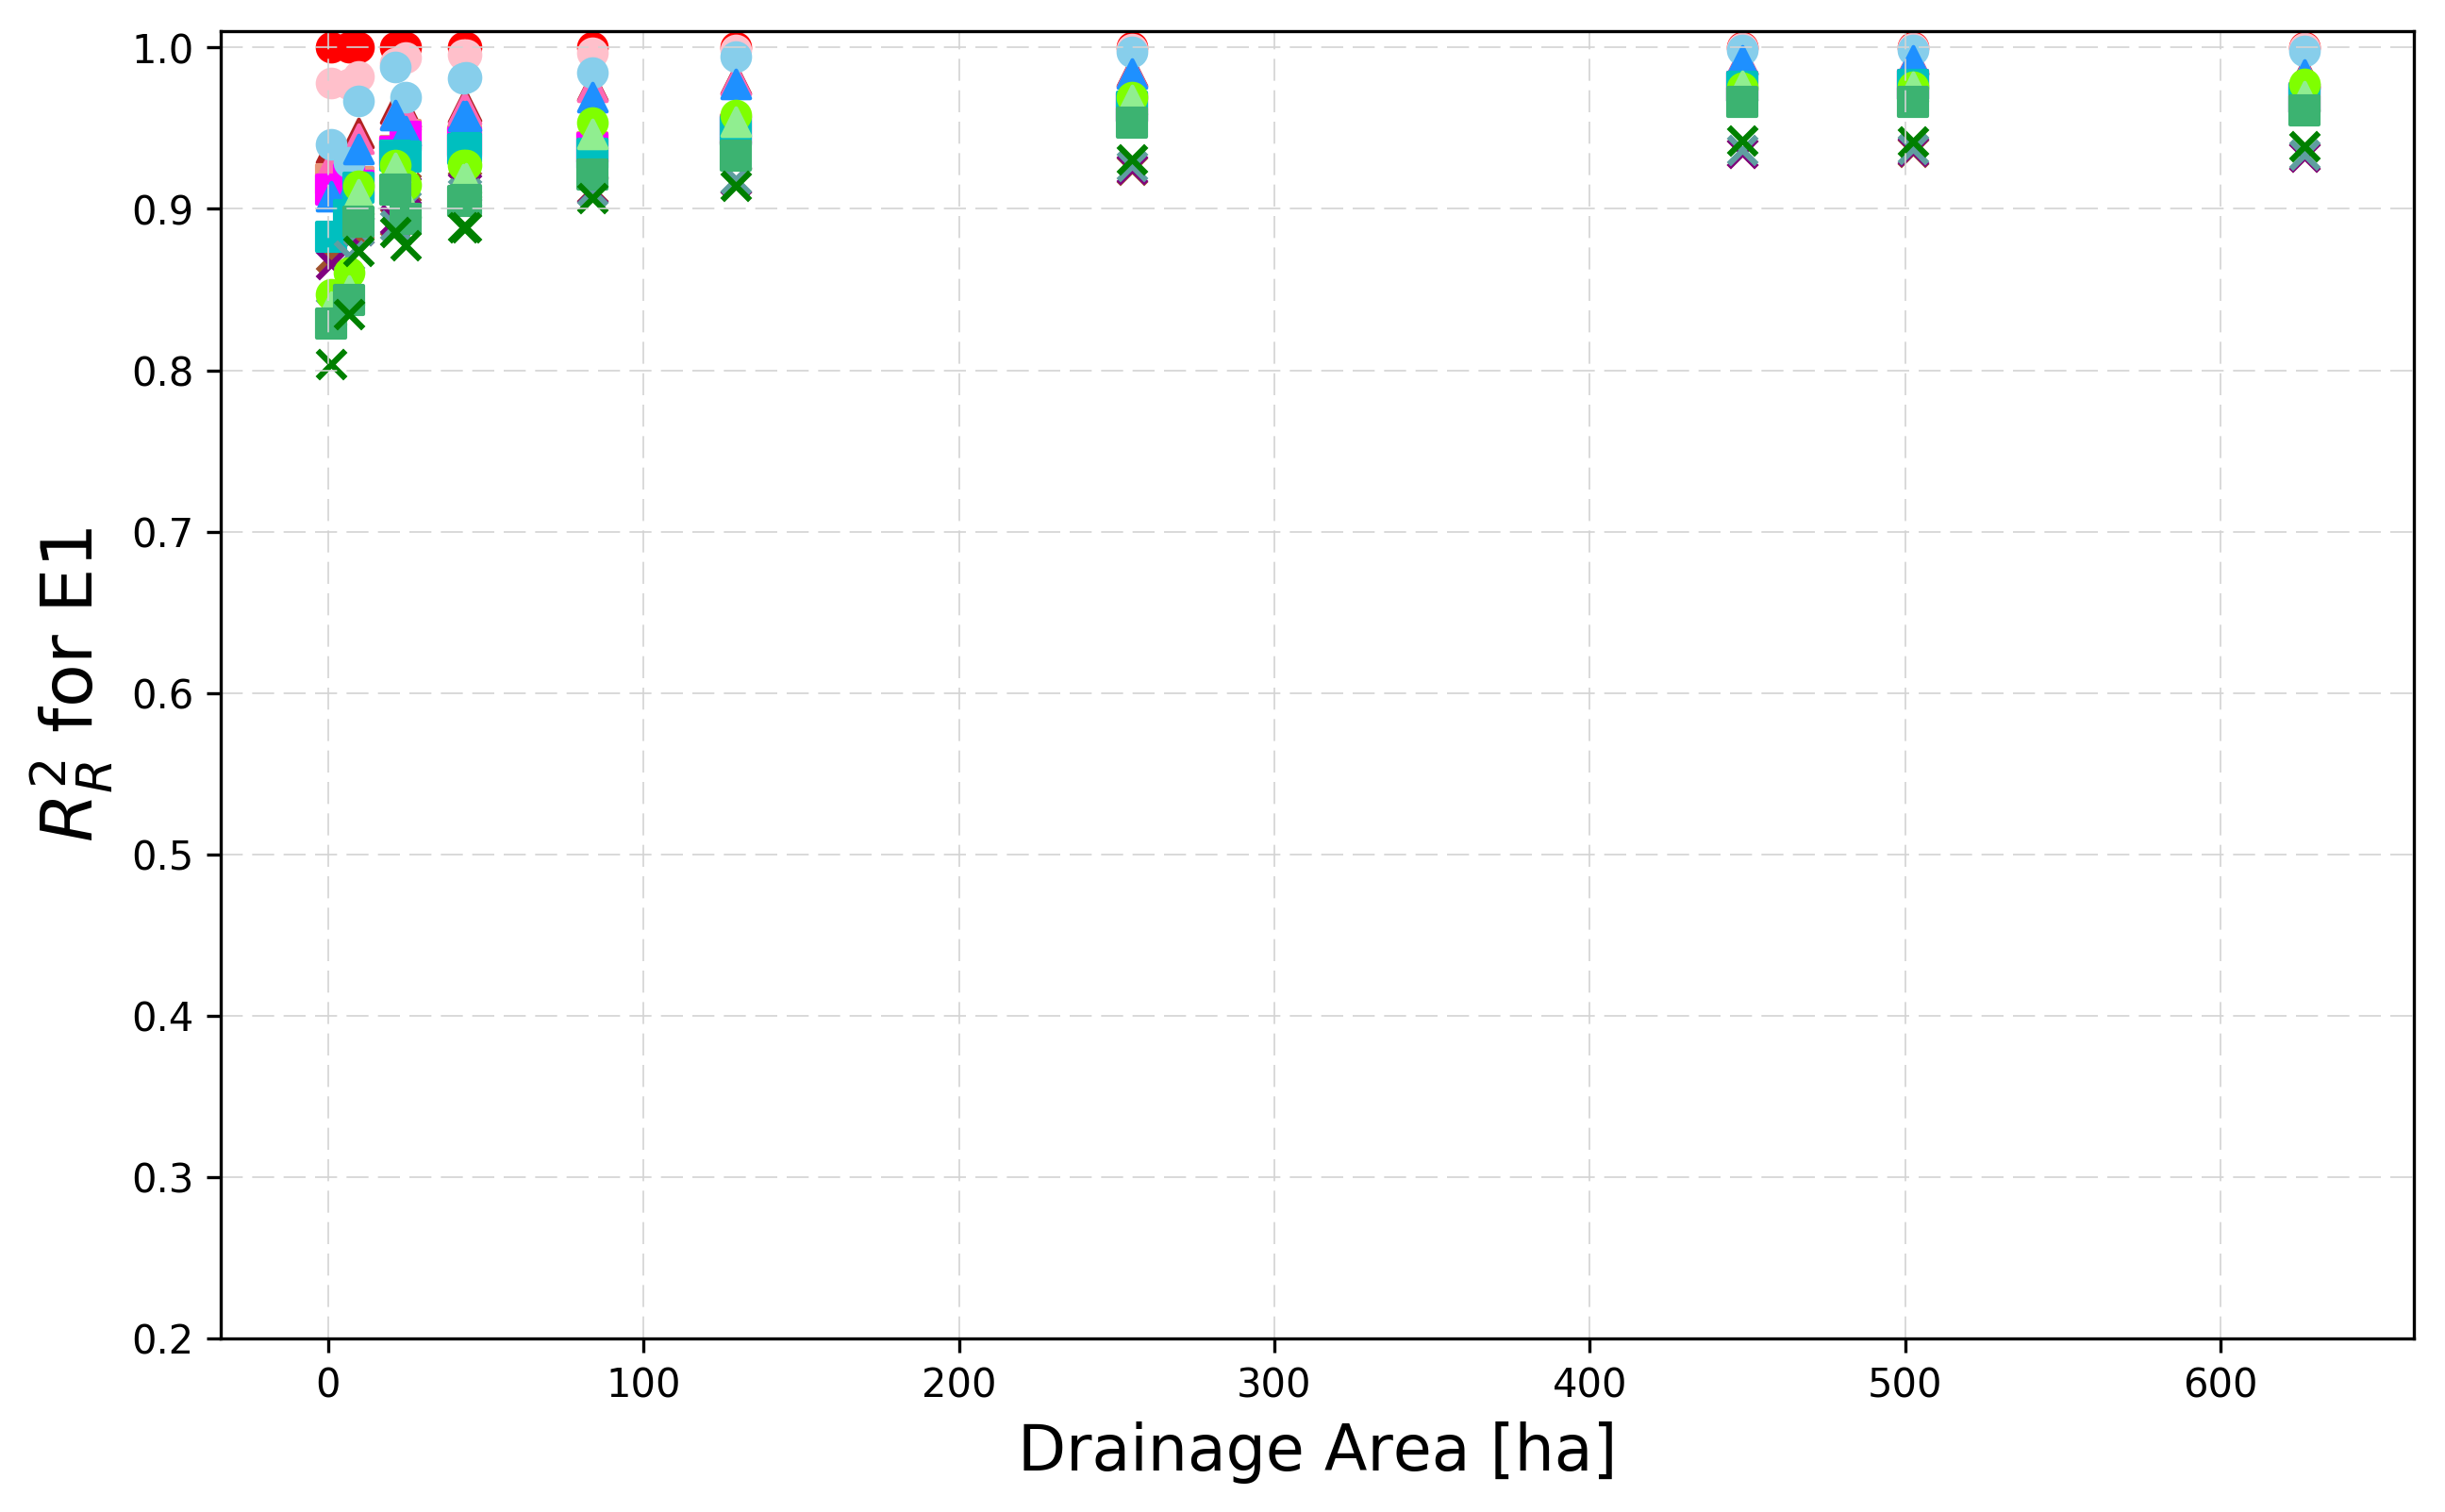

Supplement: Supplementary file 1 [file hess-22-2425-2018-supplement.zip › Rainfall/WA2_rainfall_R2_E1.png]

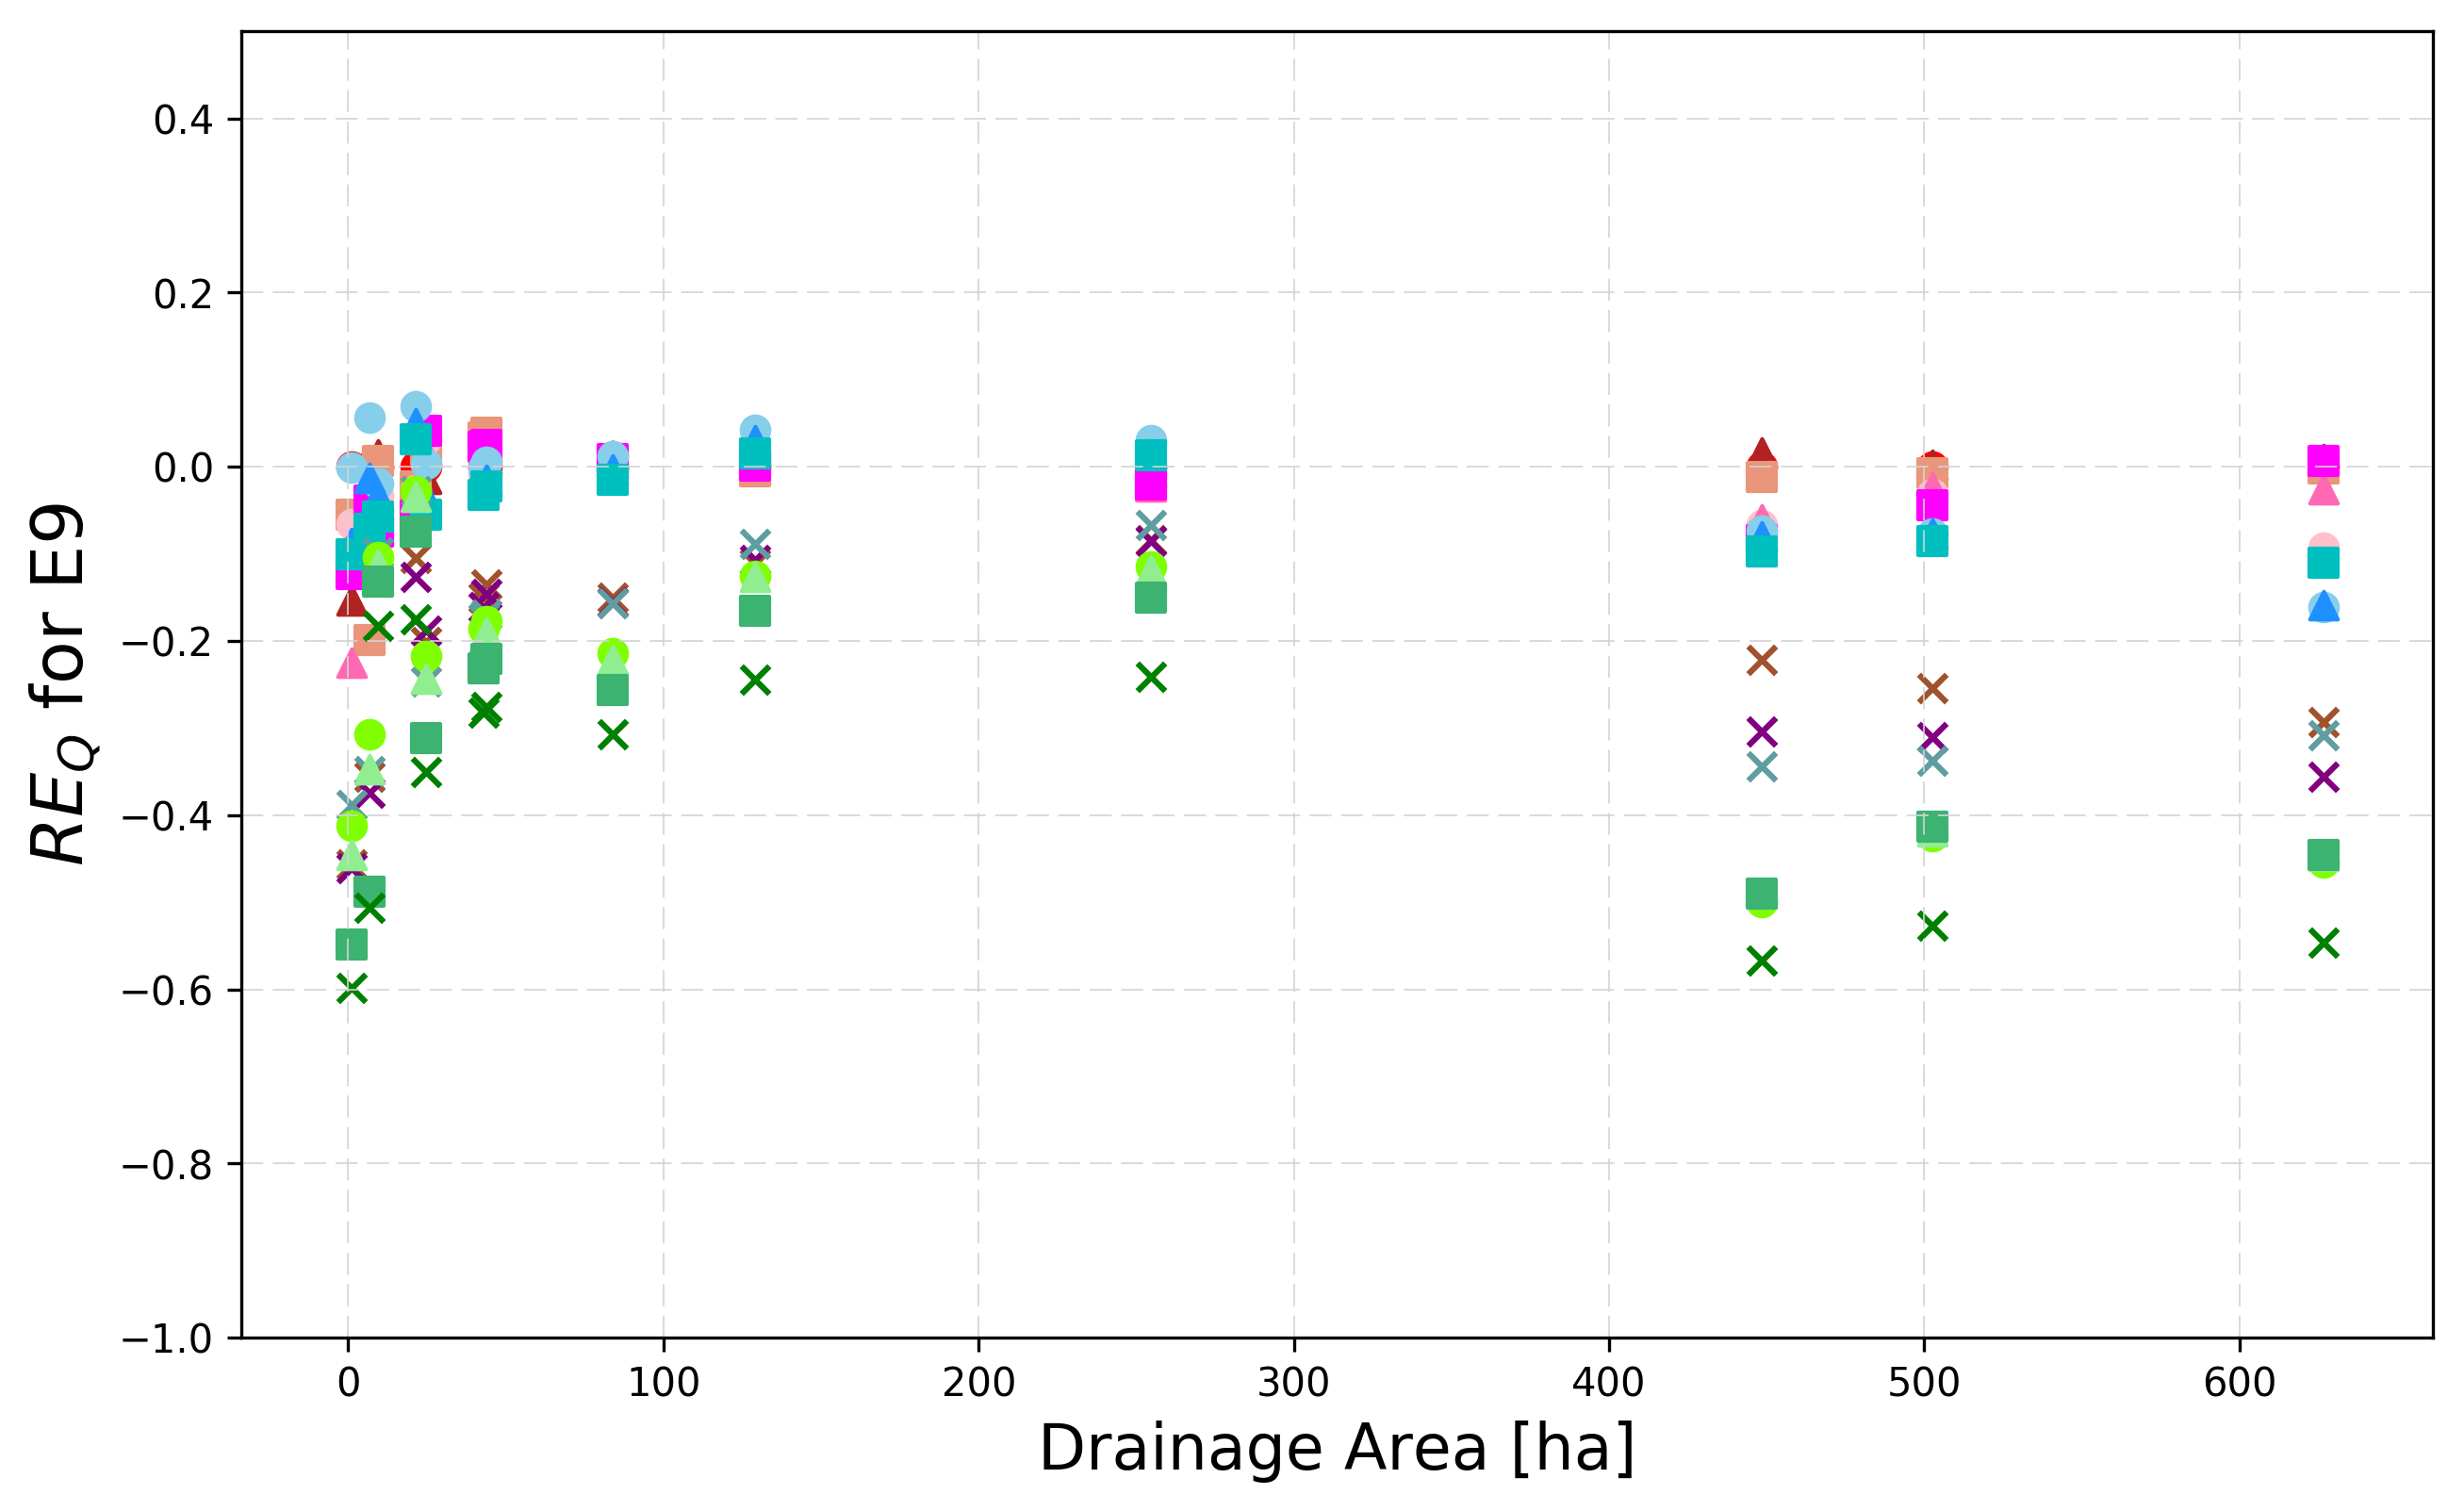

Supplement: Supplementary file 1 [file hess-22-2425-2018-supplement.zip › Flow/Flow3_RE_E9.png]

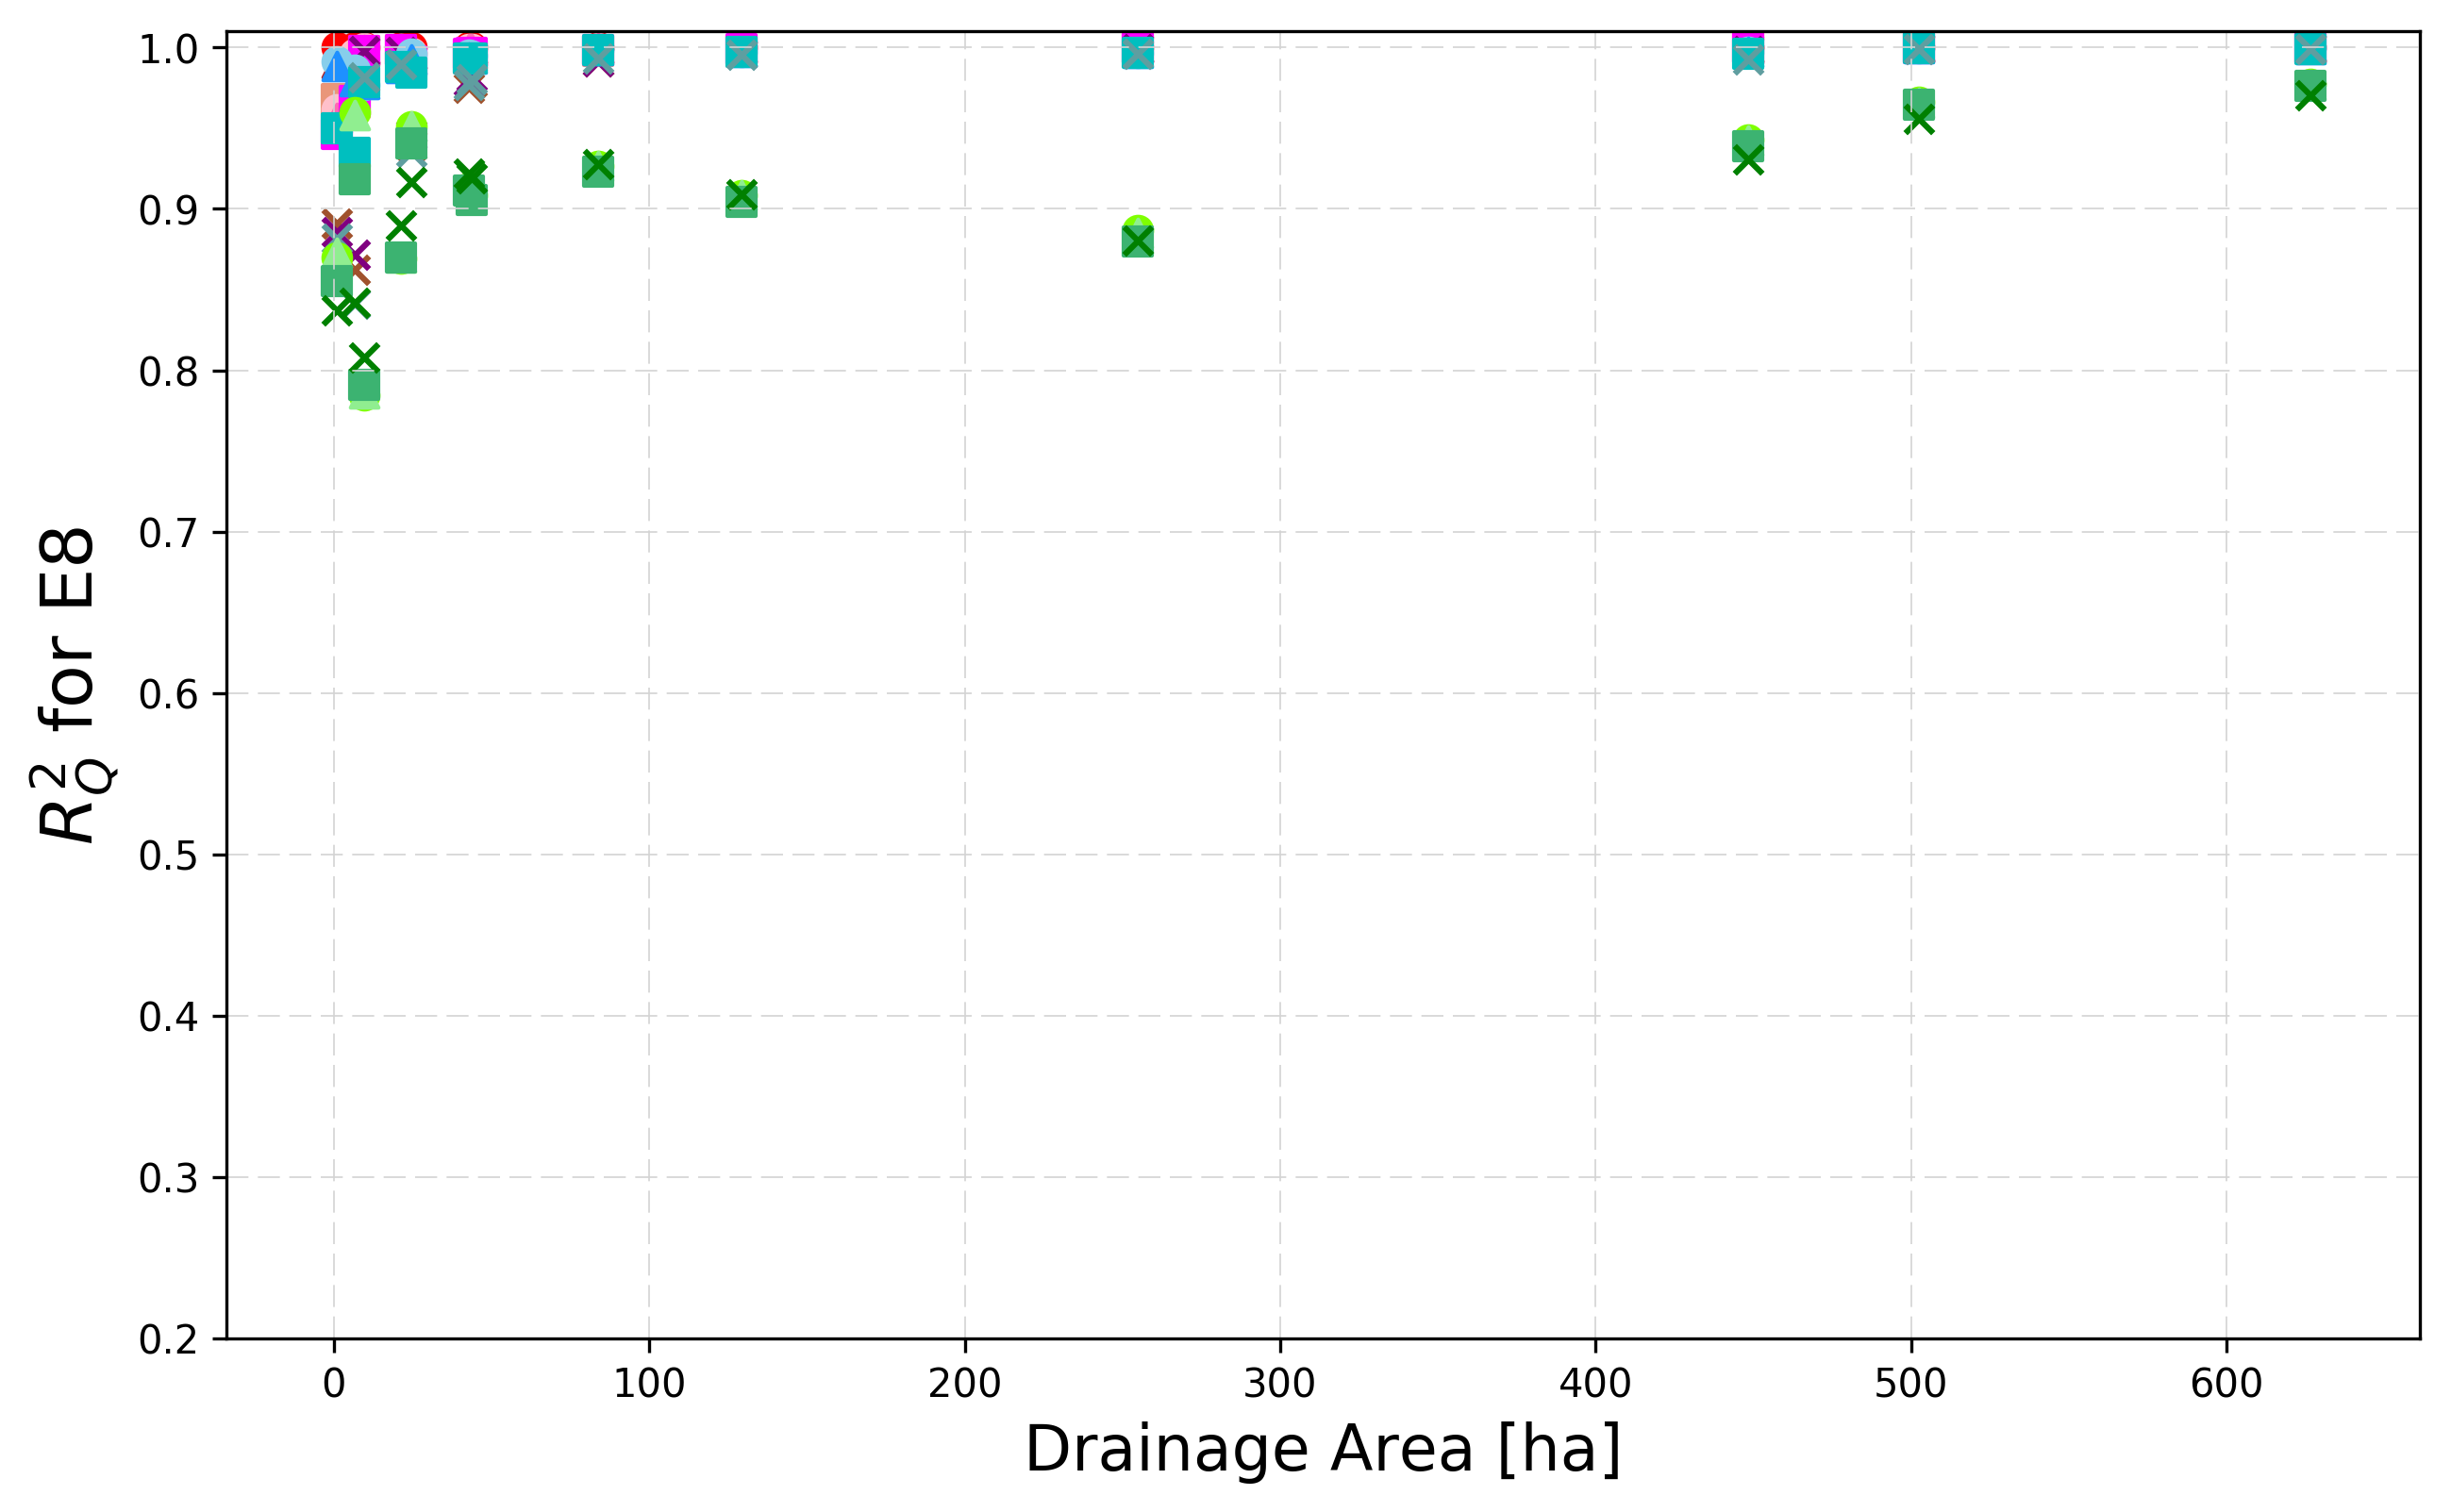

Supplement: Supplementary file 1 [file hess-22-2425-2018-supplement.zip › Flow/Flow3_R2_E8.png]

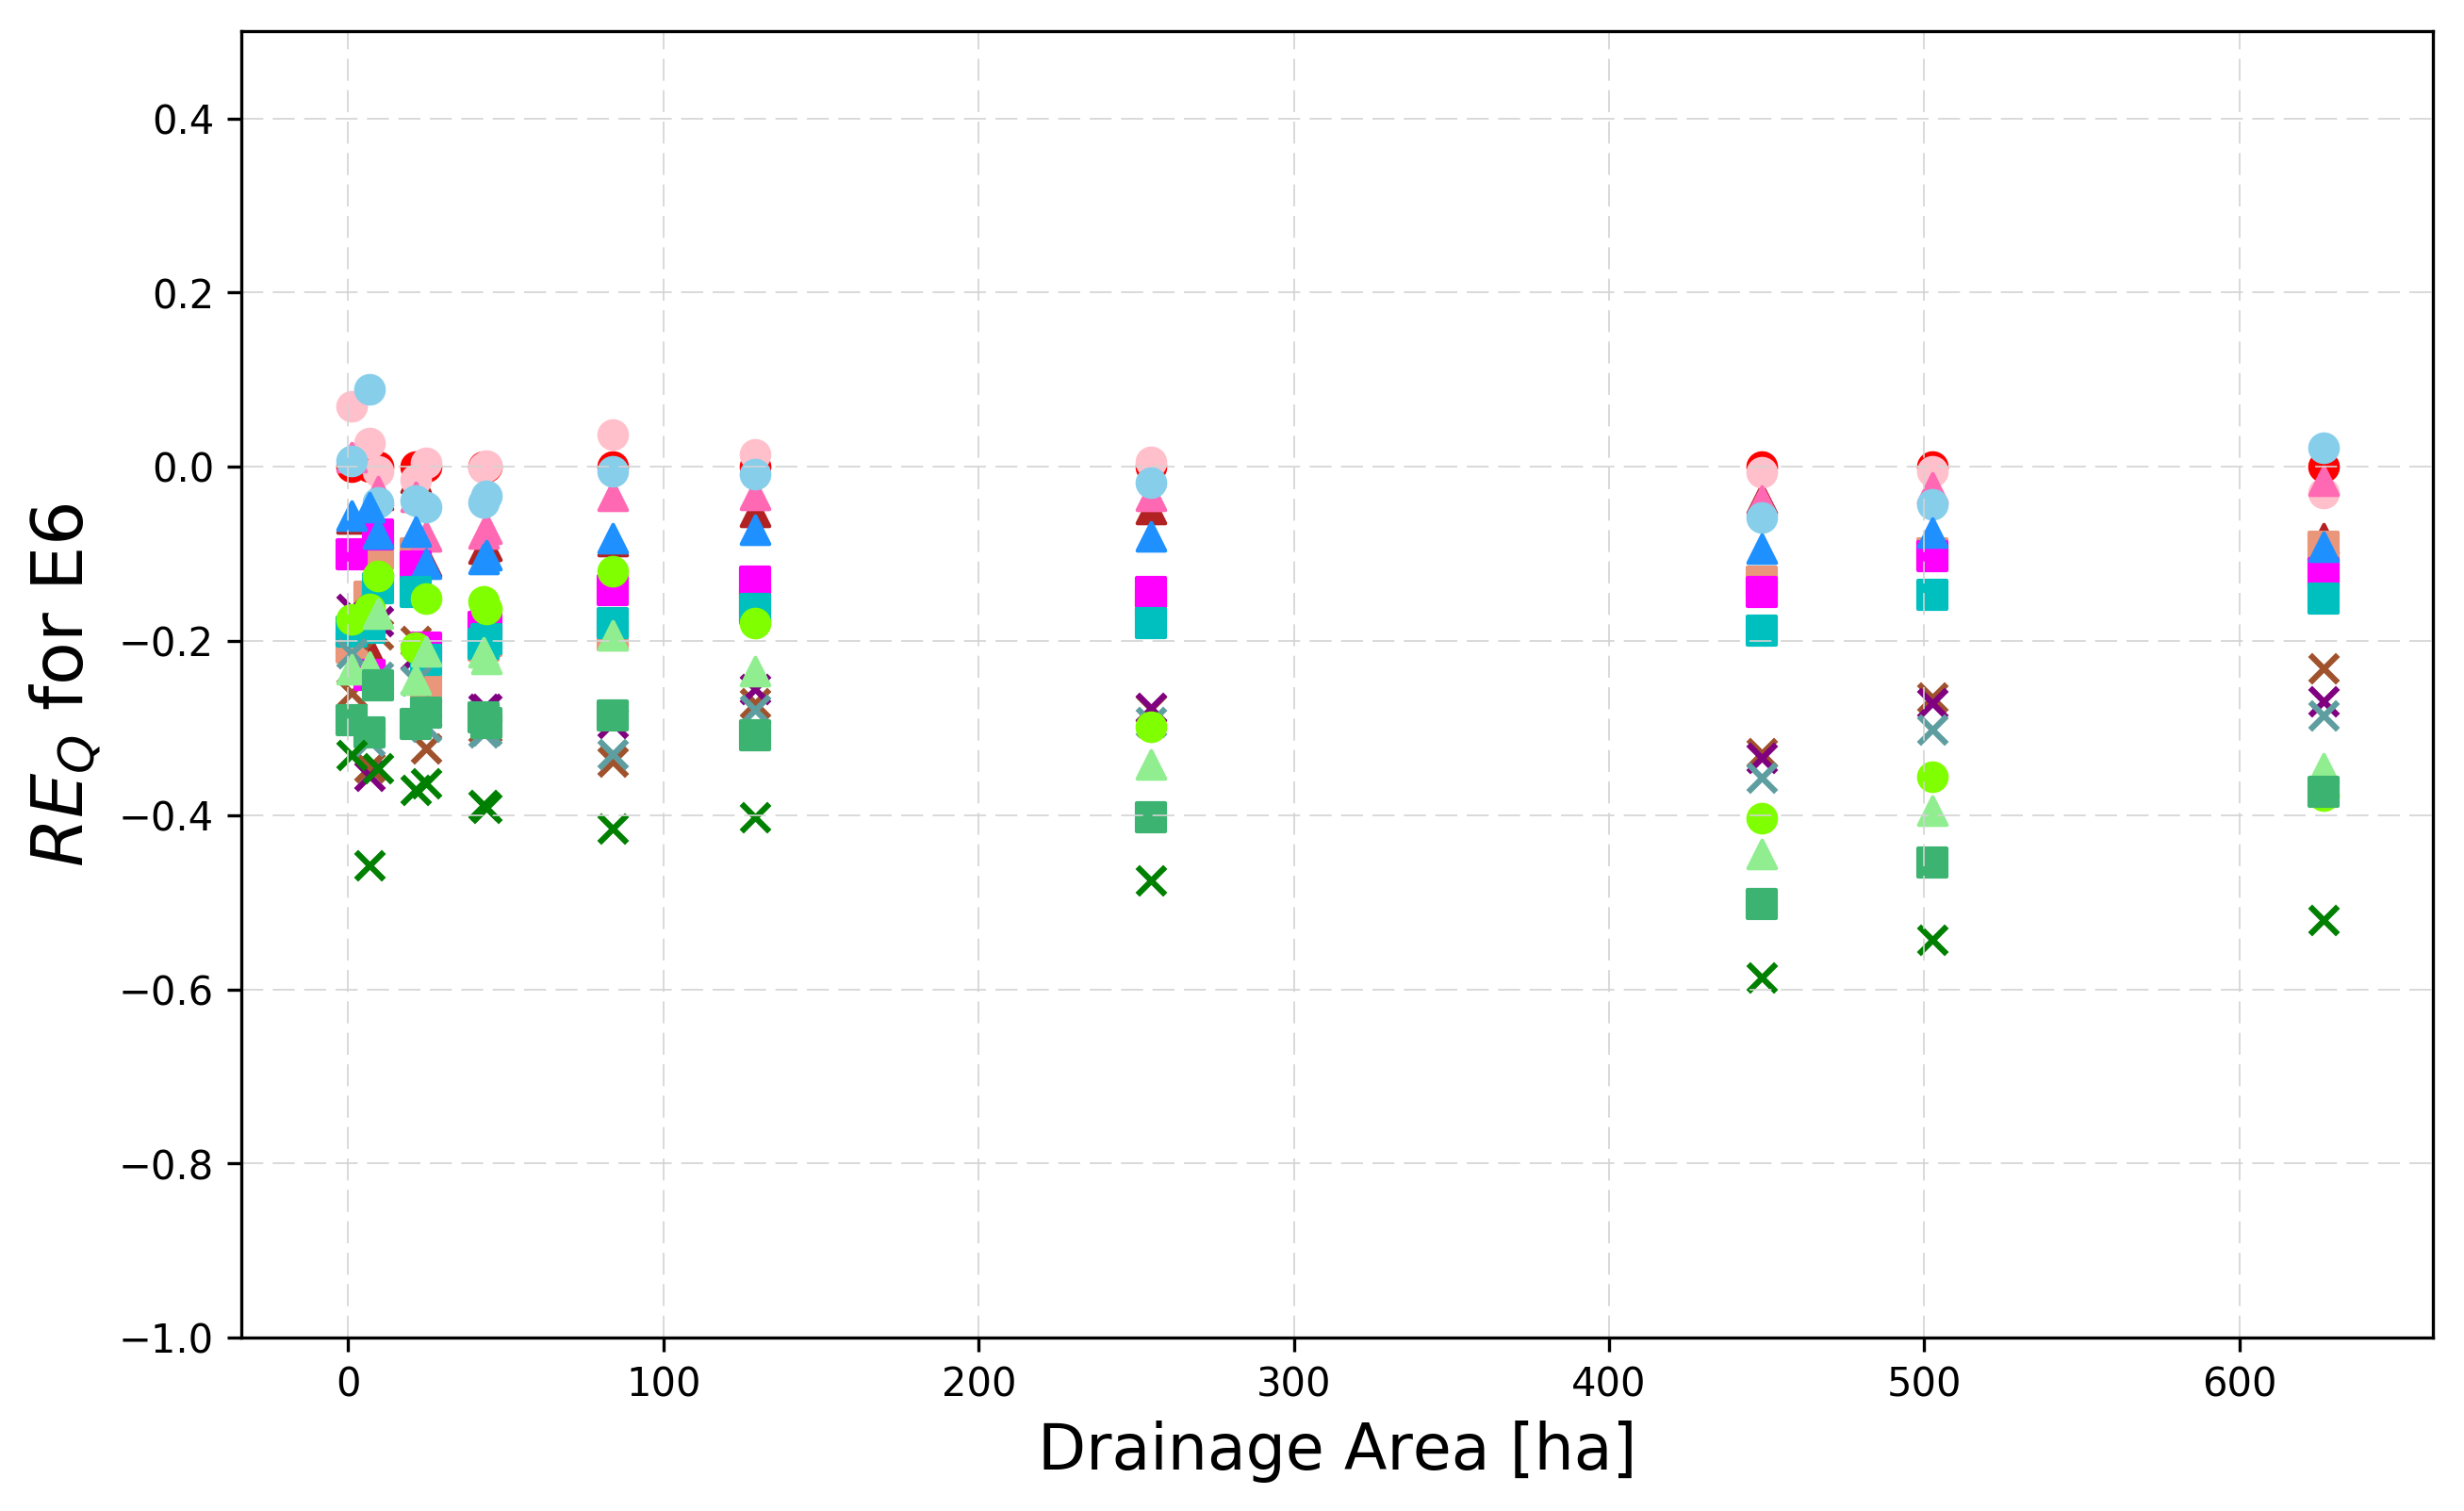

Supplement: Supplementary file 1 [file hess-22-2425-2018-supplement.zip › Flow/Flow3_RE_E6.png]

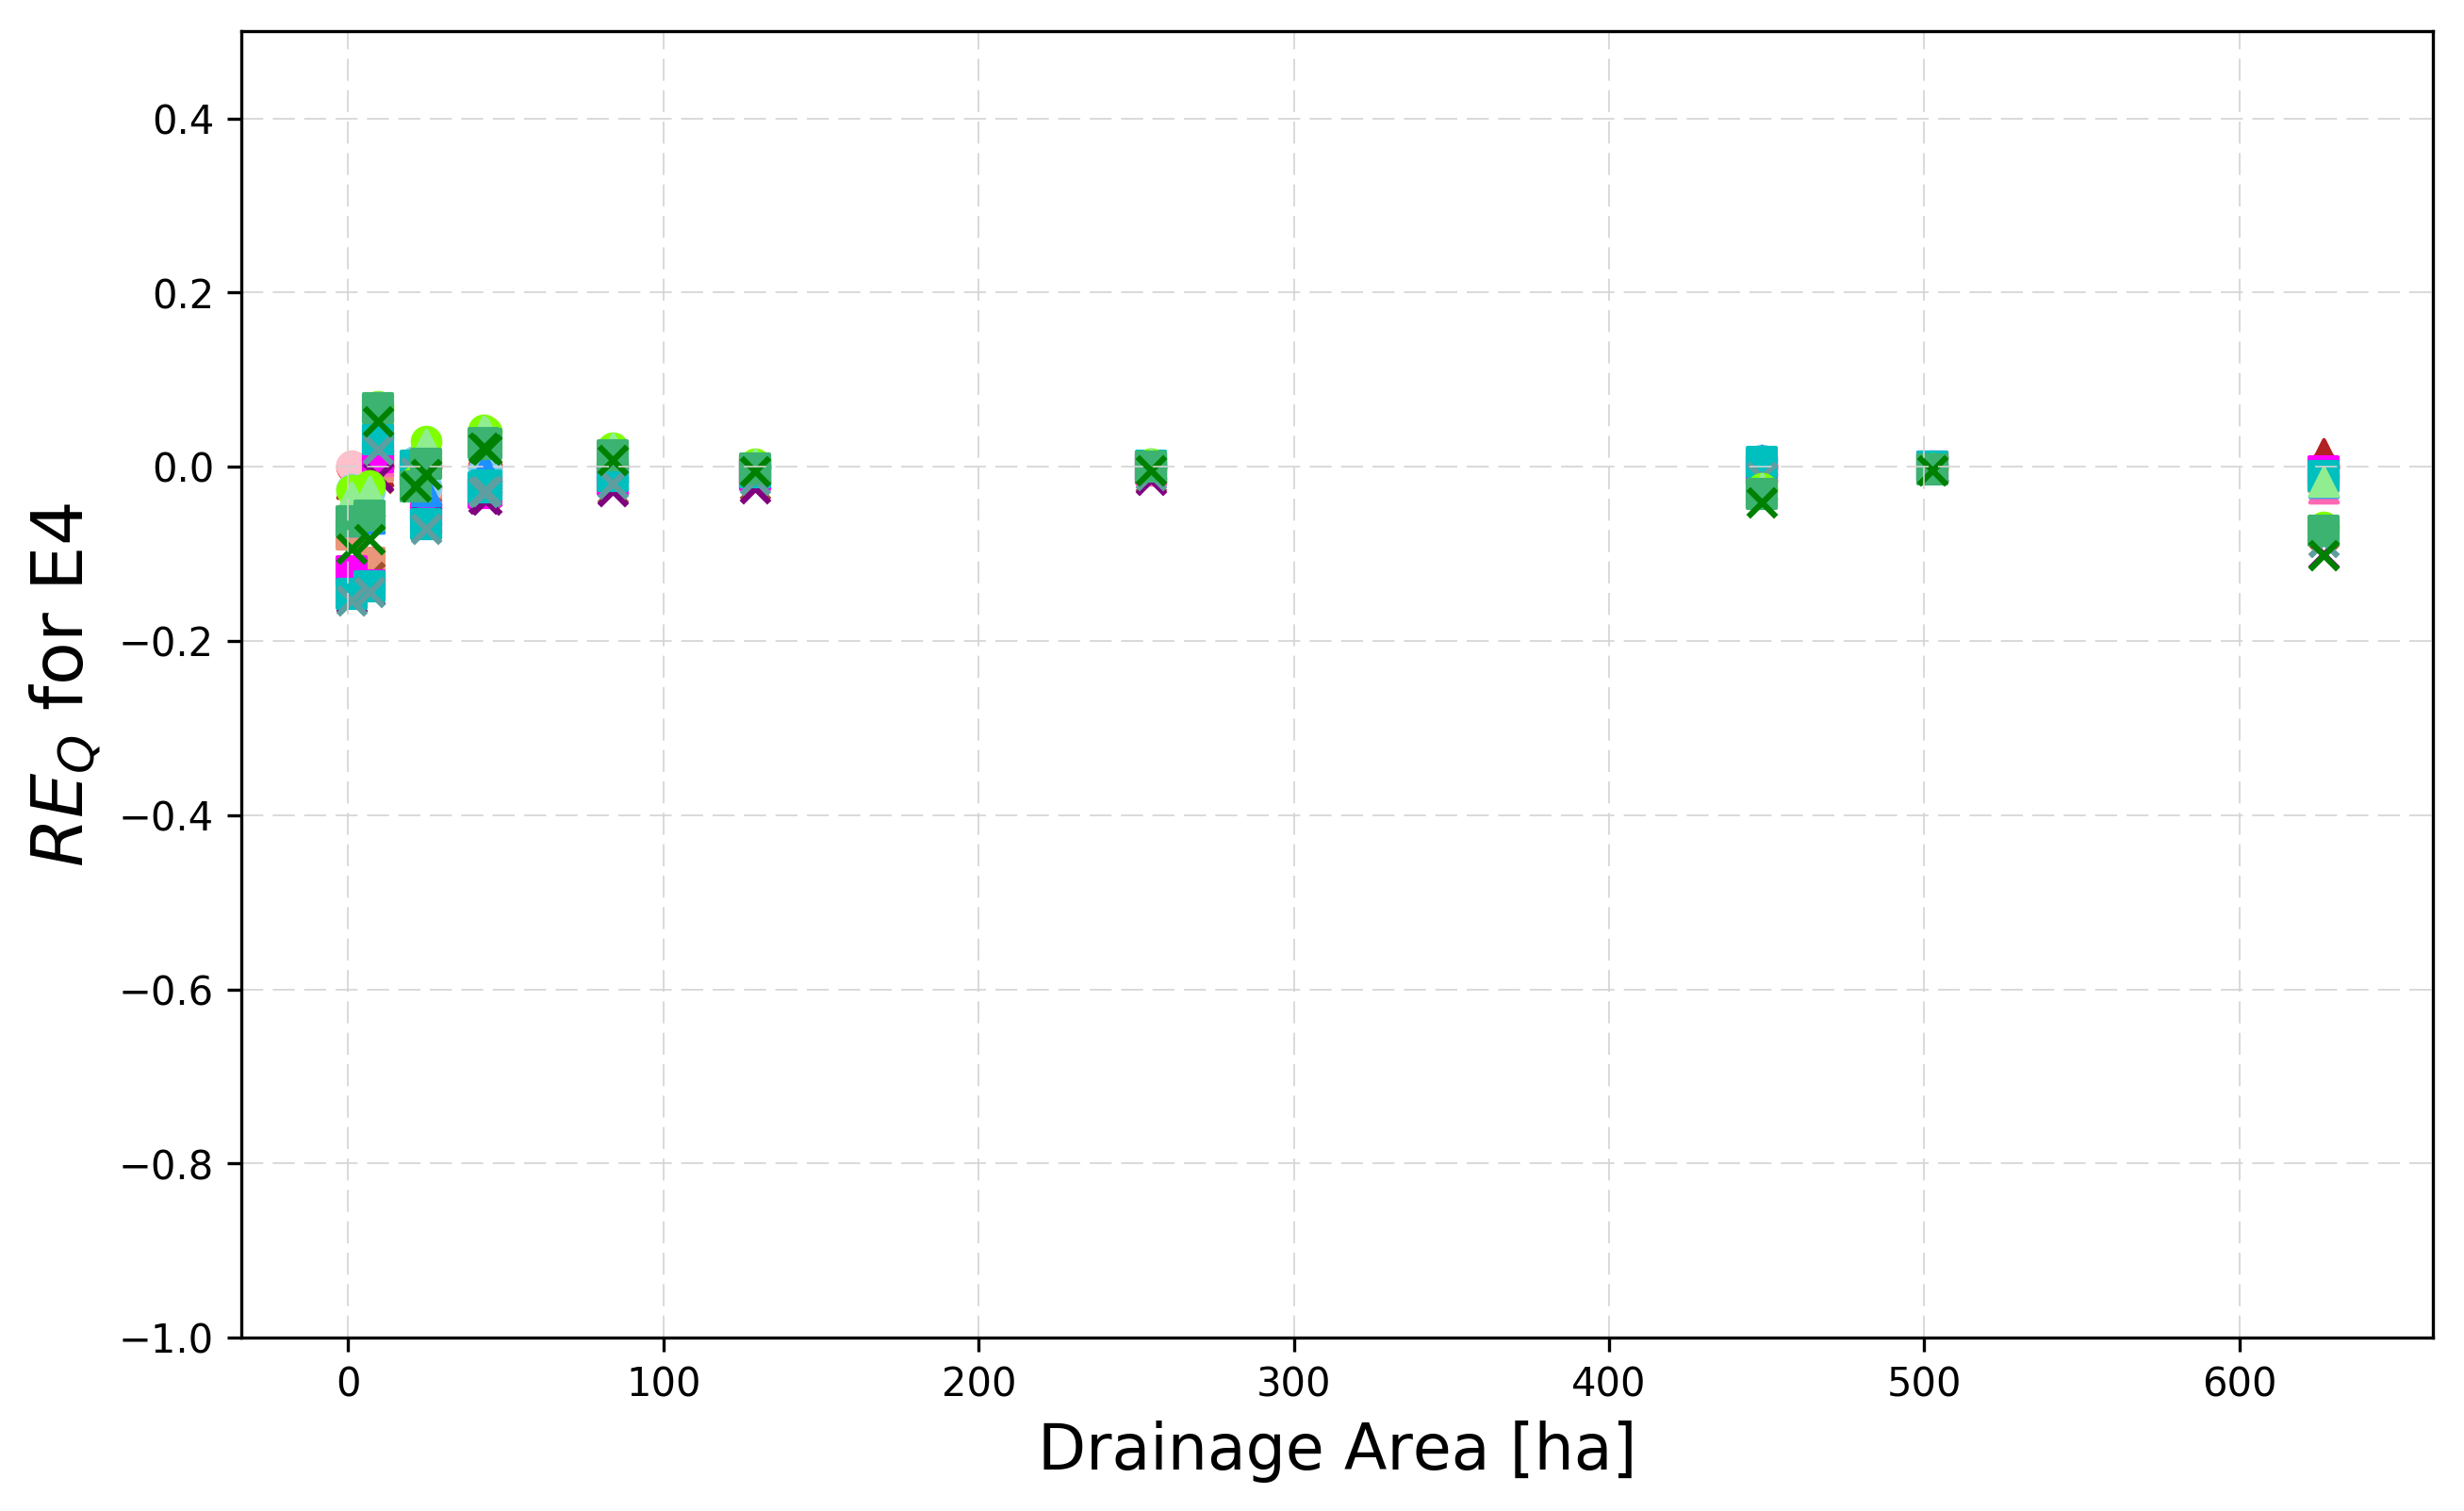

Supplement: Supplementary file 1 [file hess-22-2425-2018-supplement.zip › Flow/Flow3_RE_E4.png]

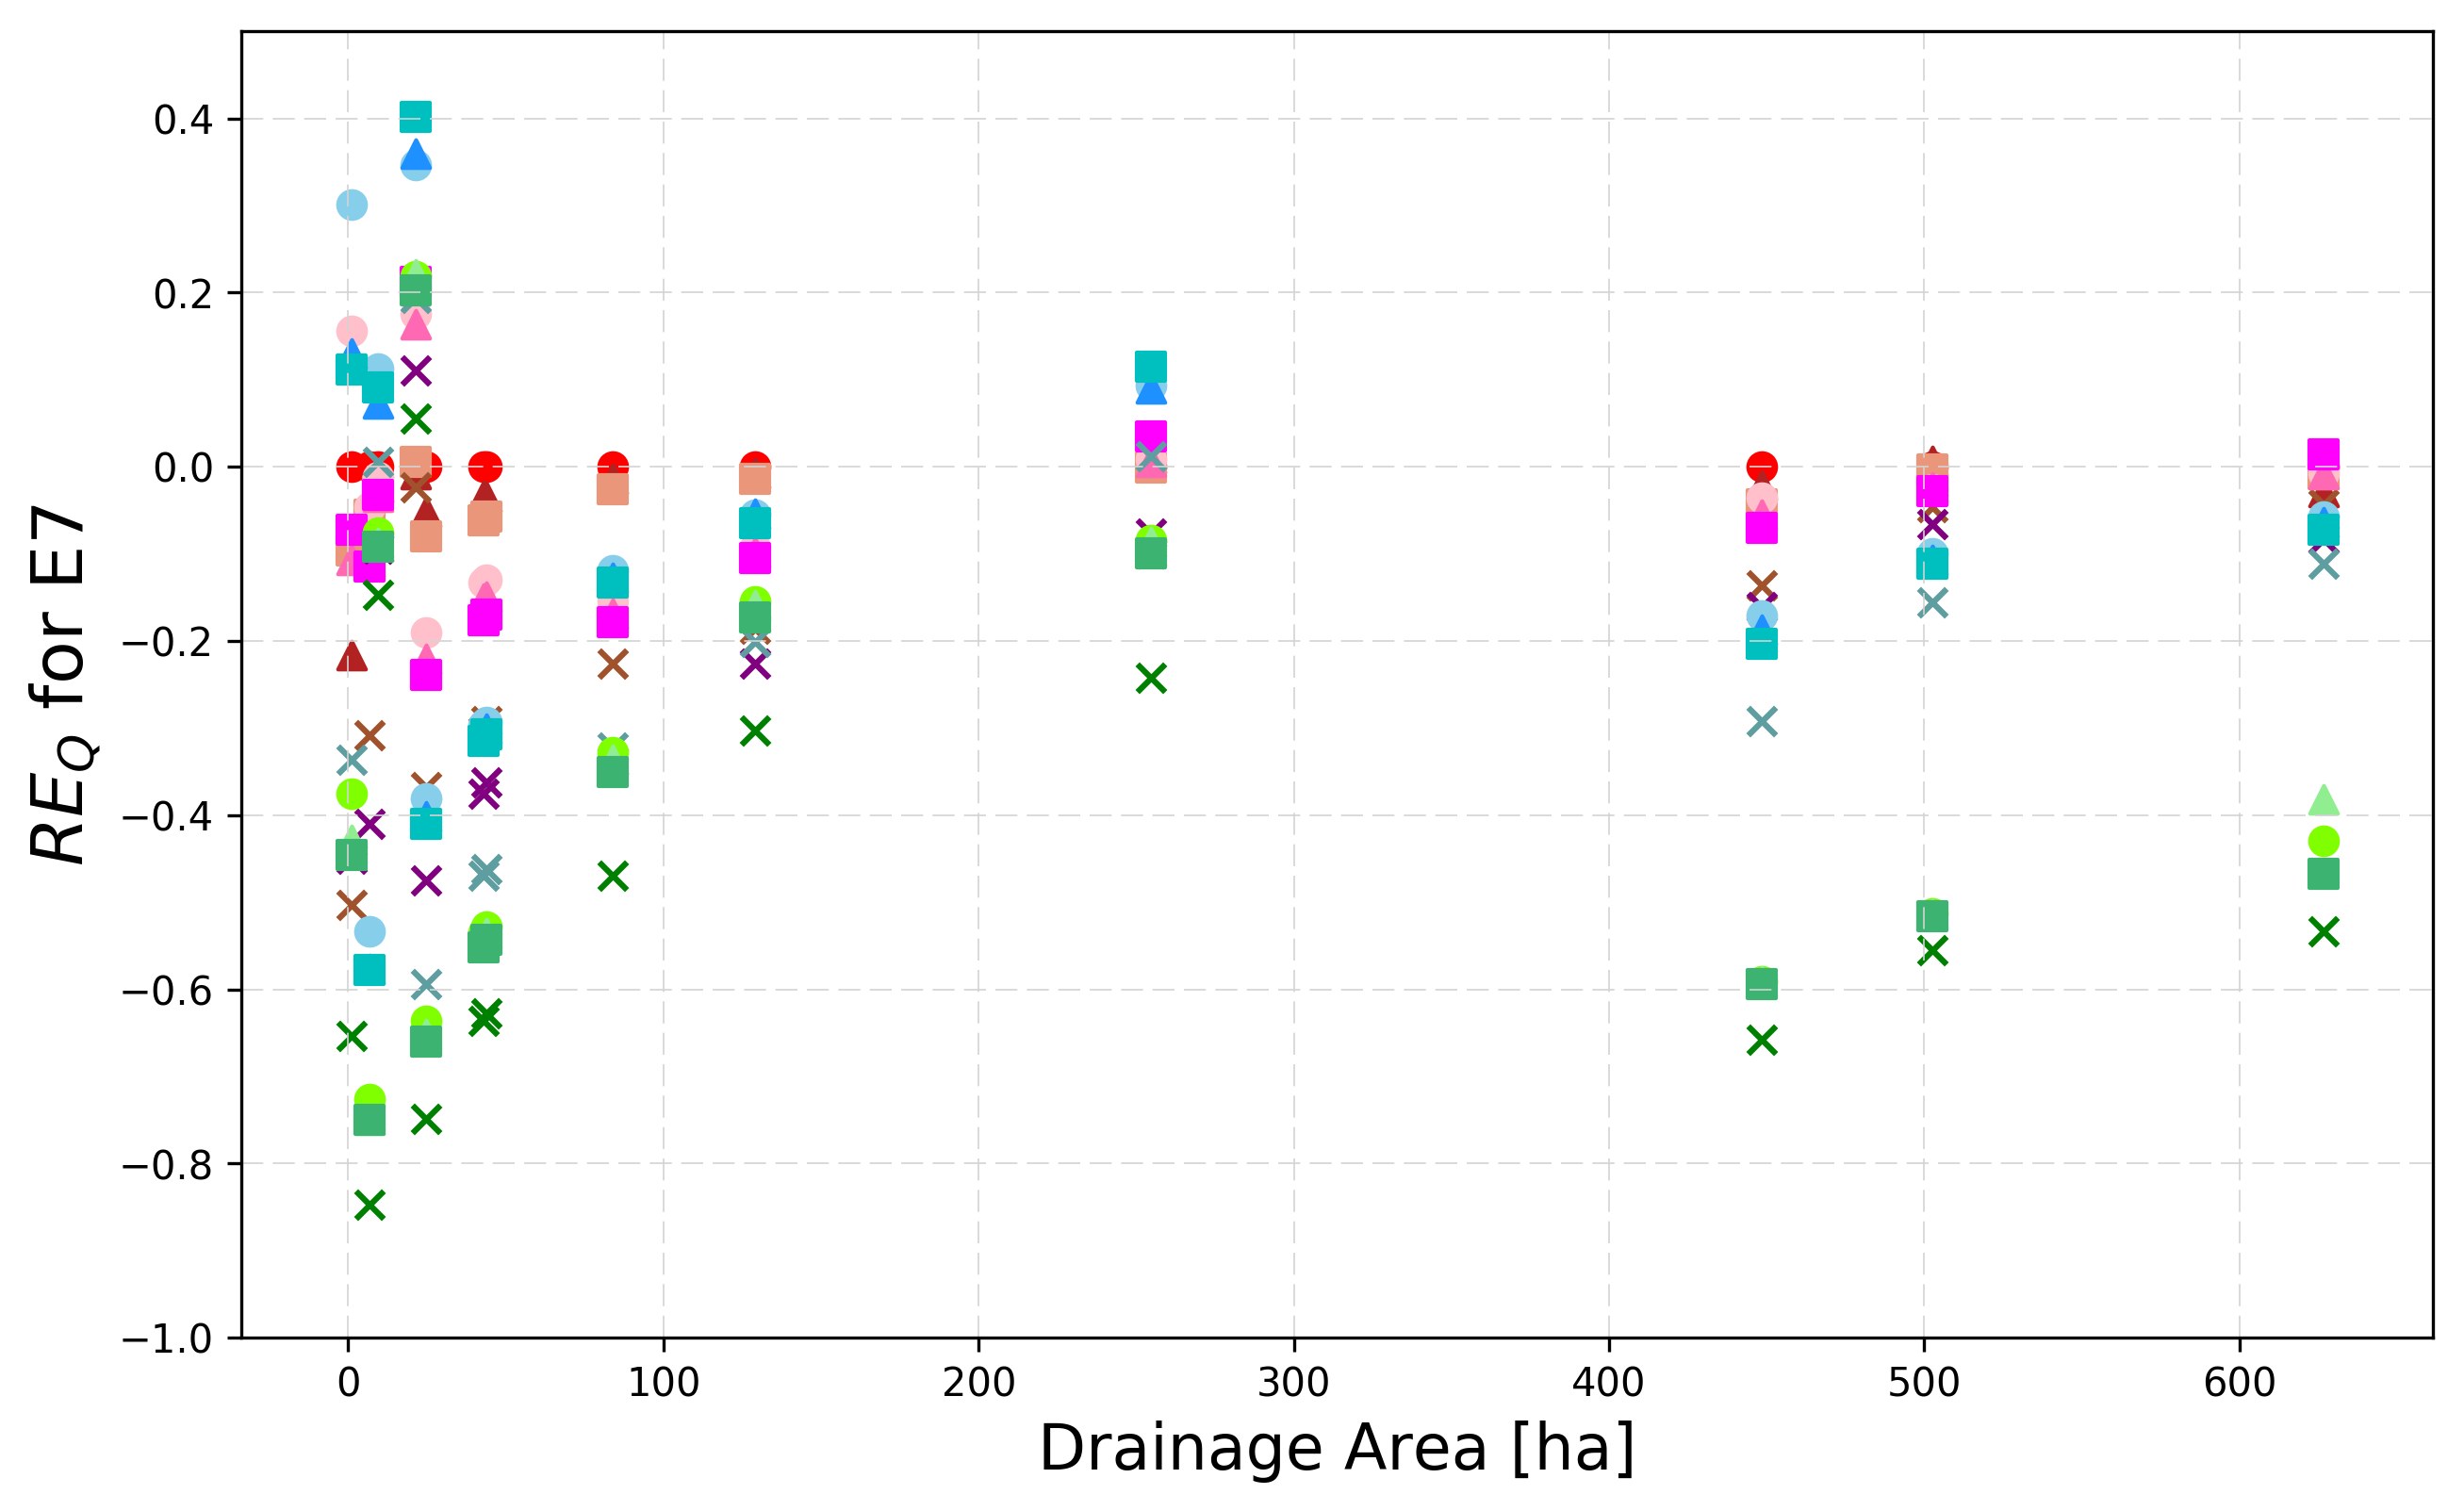

Supplement: Supplementary file 1 [file hess-22-2425-2018-supplement.zip › Flow/Flow3_RE_E7.png]

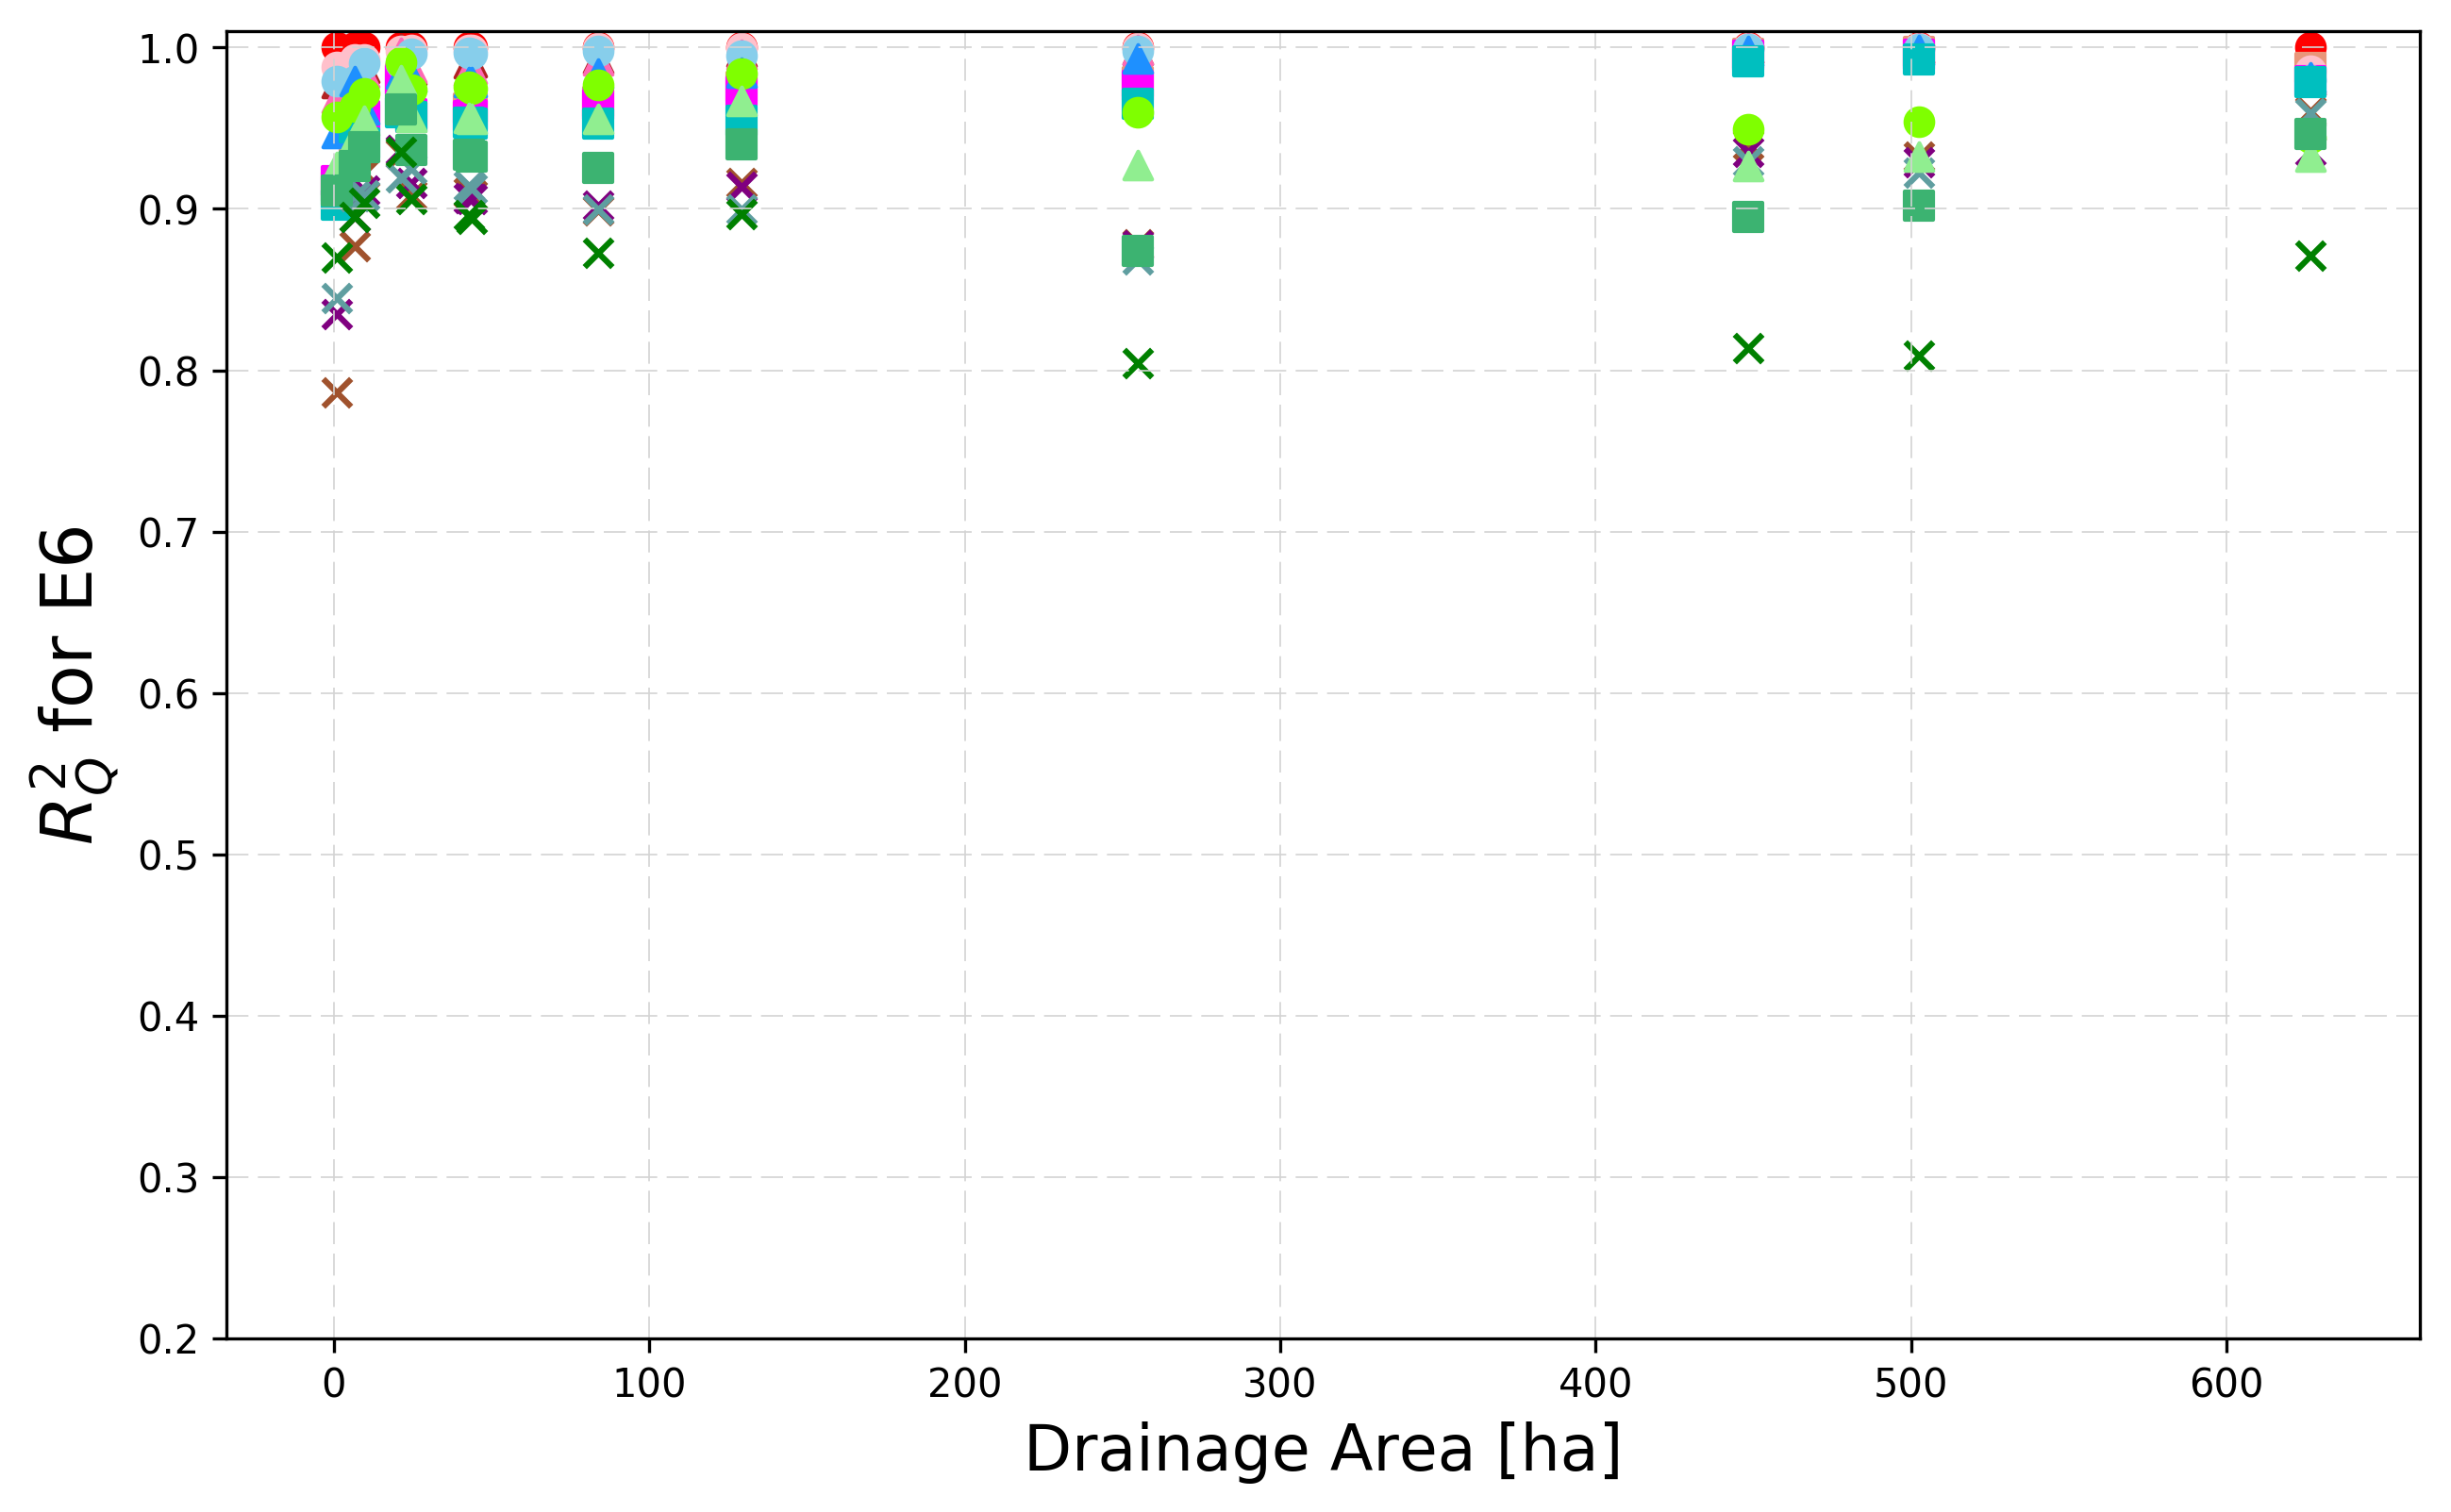

Supplement: Supplementary file 1 [file hess-22-2425-2018-supplement.zip › Flow/Flow3_R2_E6.png]

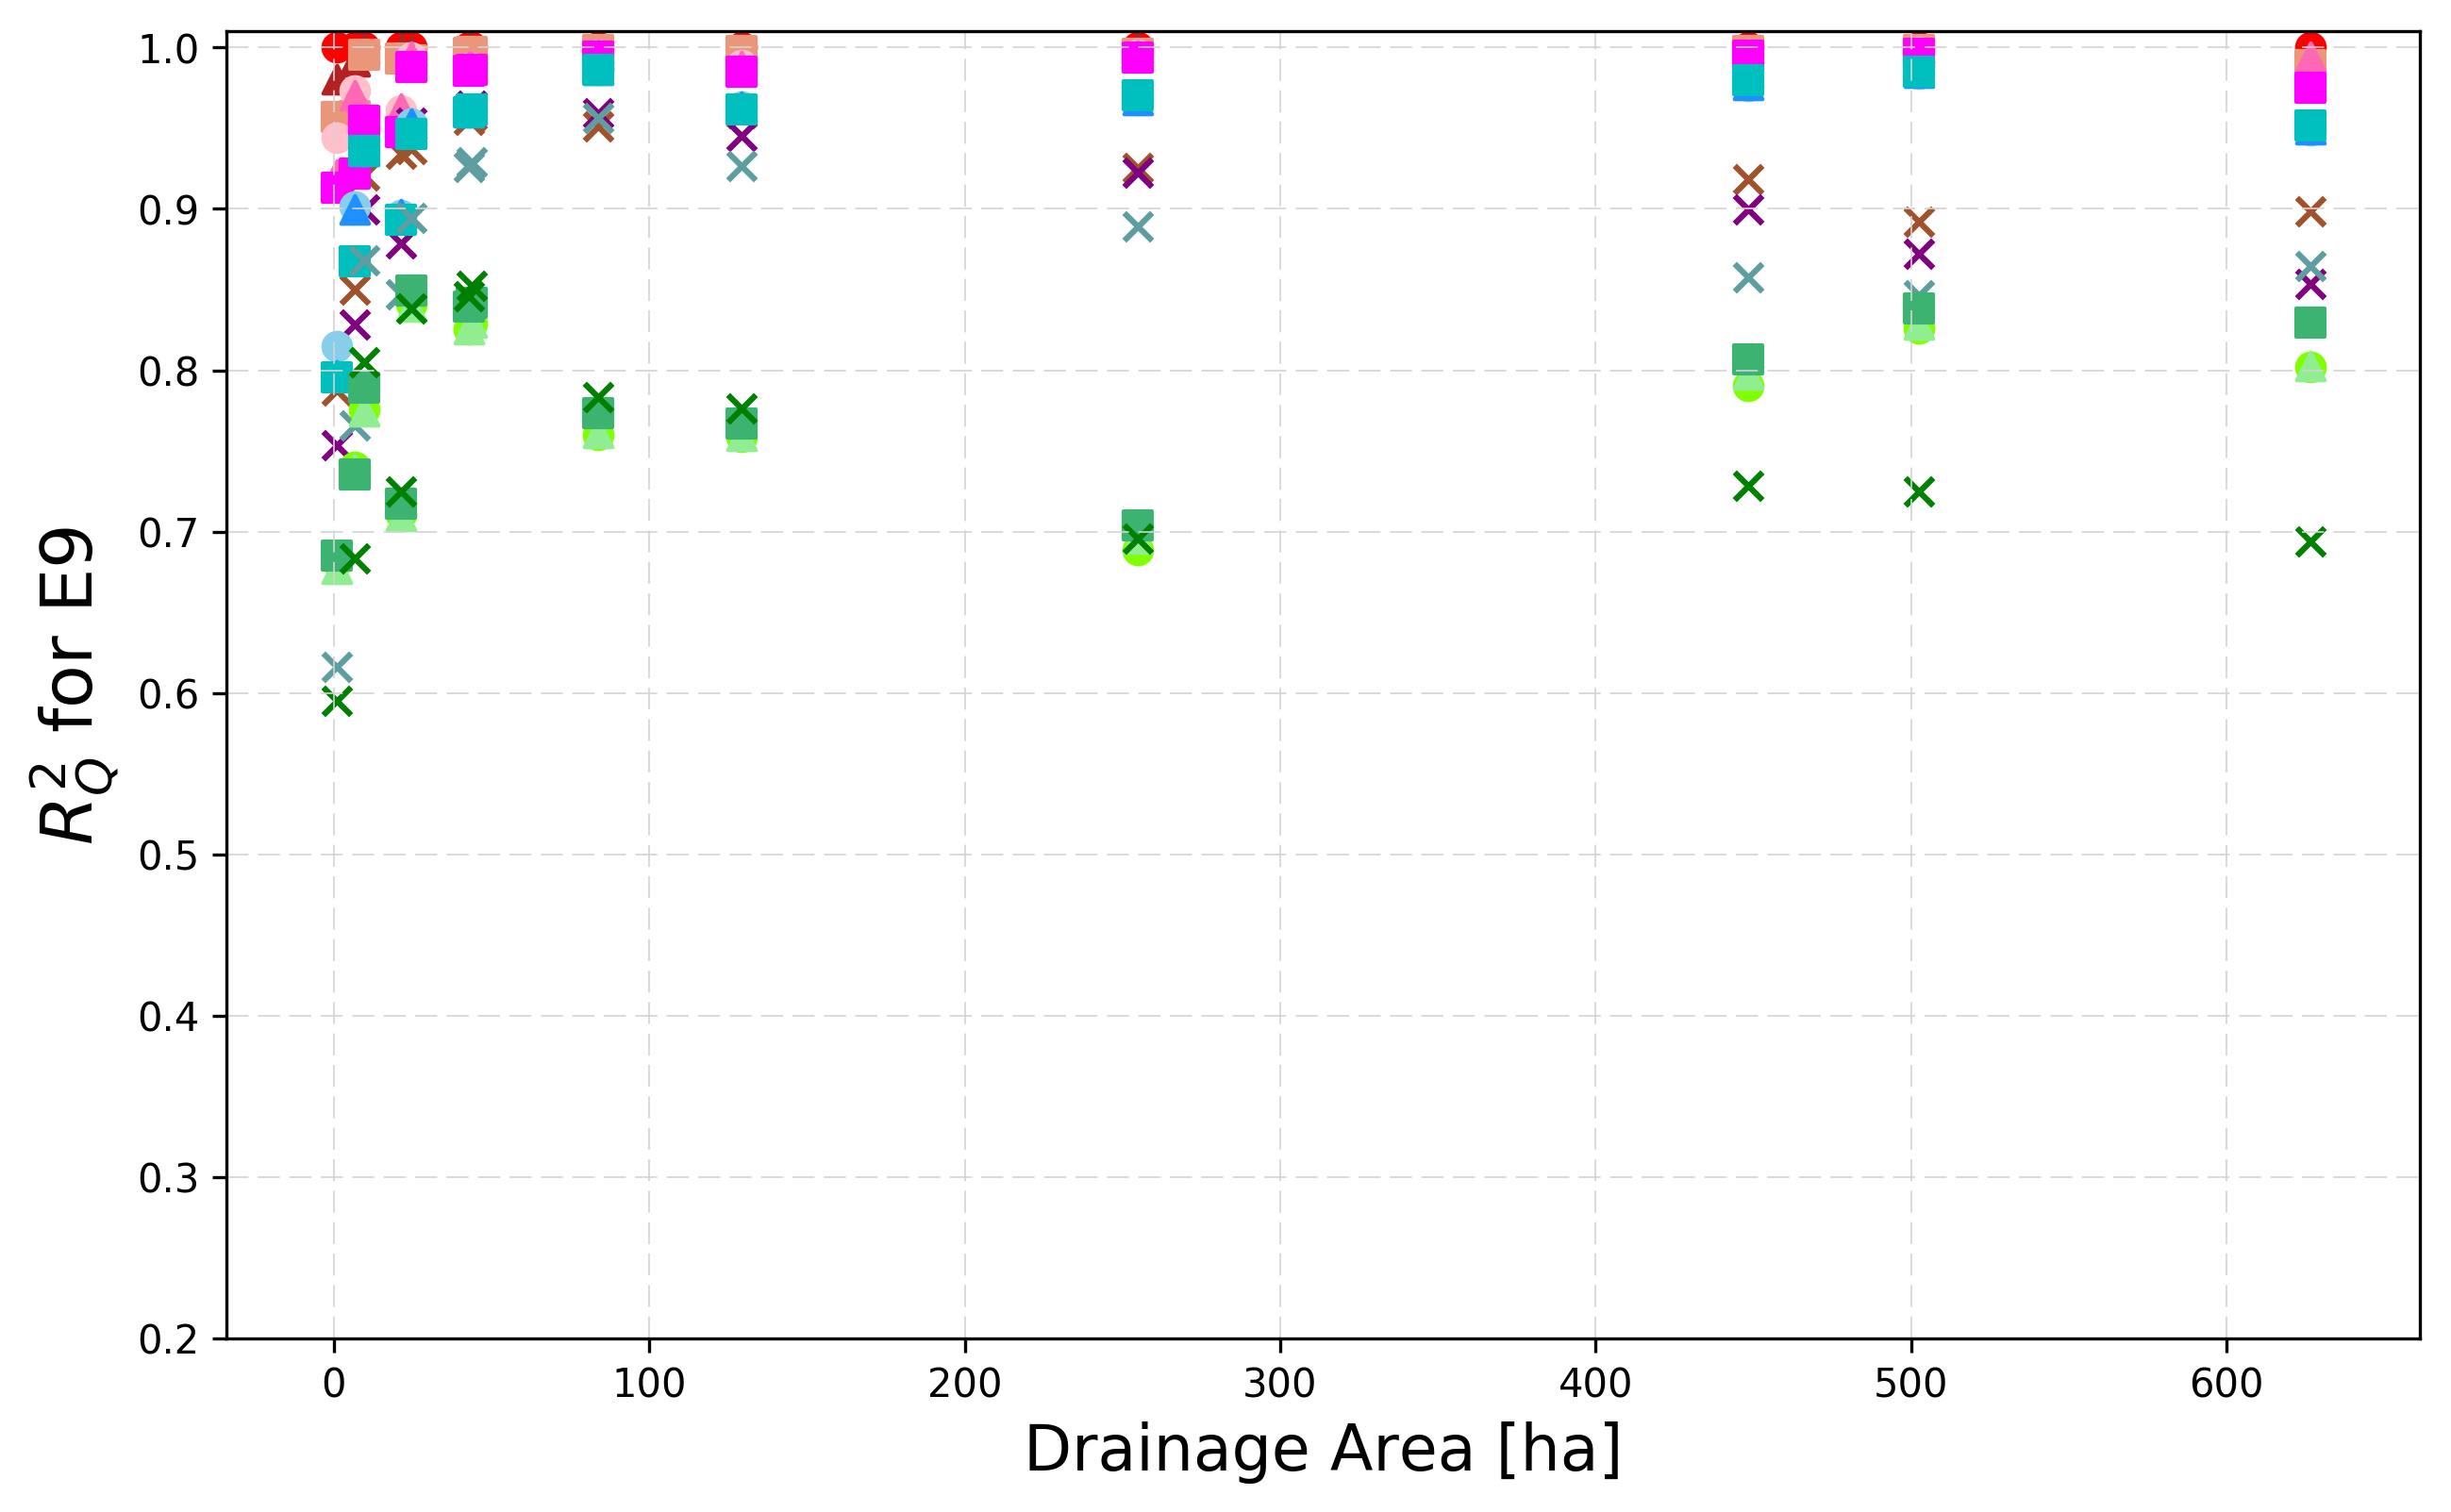

Supplement: Supplementary file 1 [file hess-22-2425-2018-supplement.zip › Flow/Flow3_R2_E9.png]

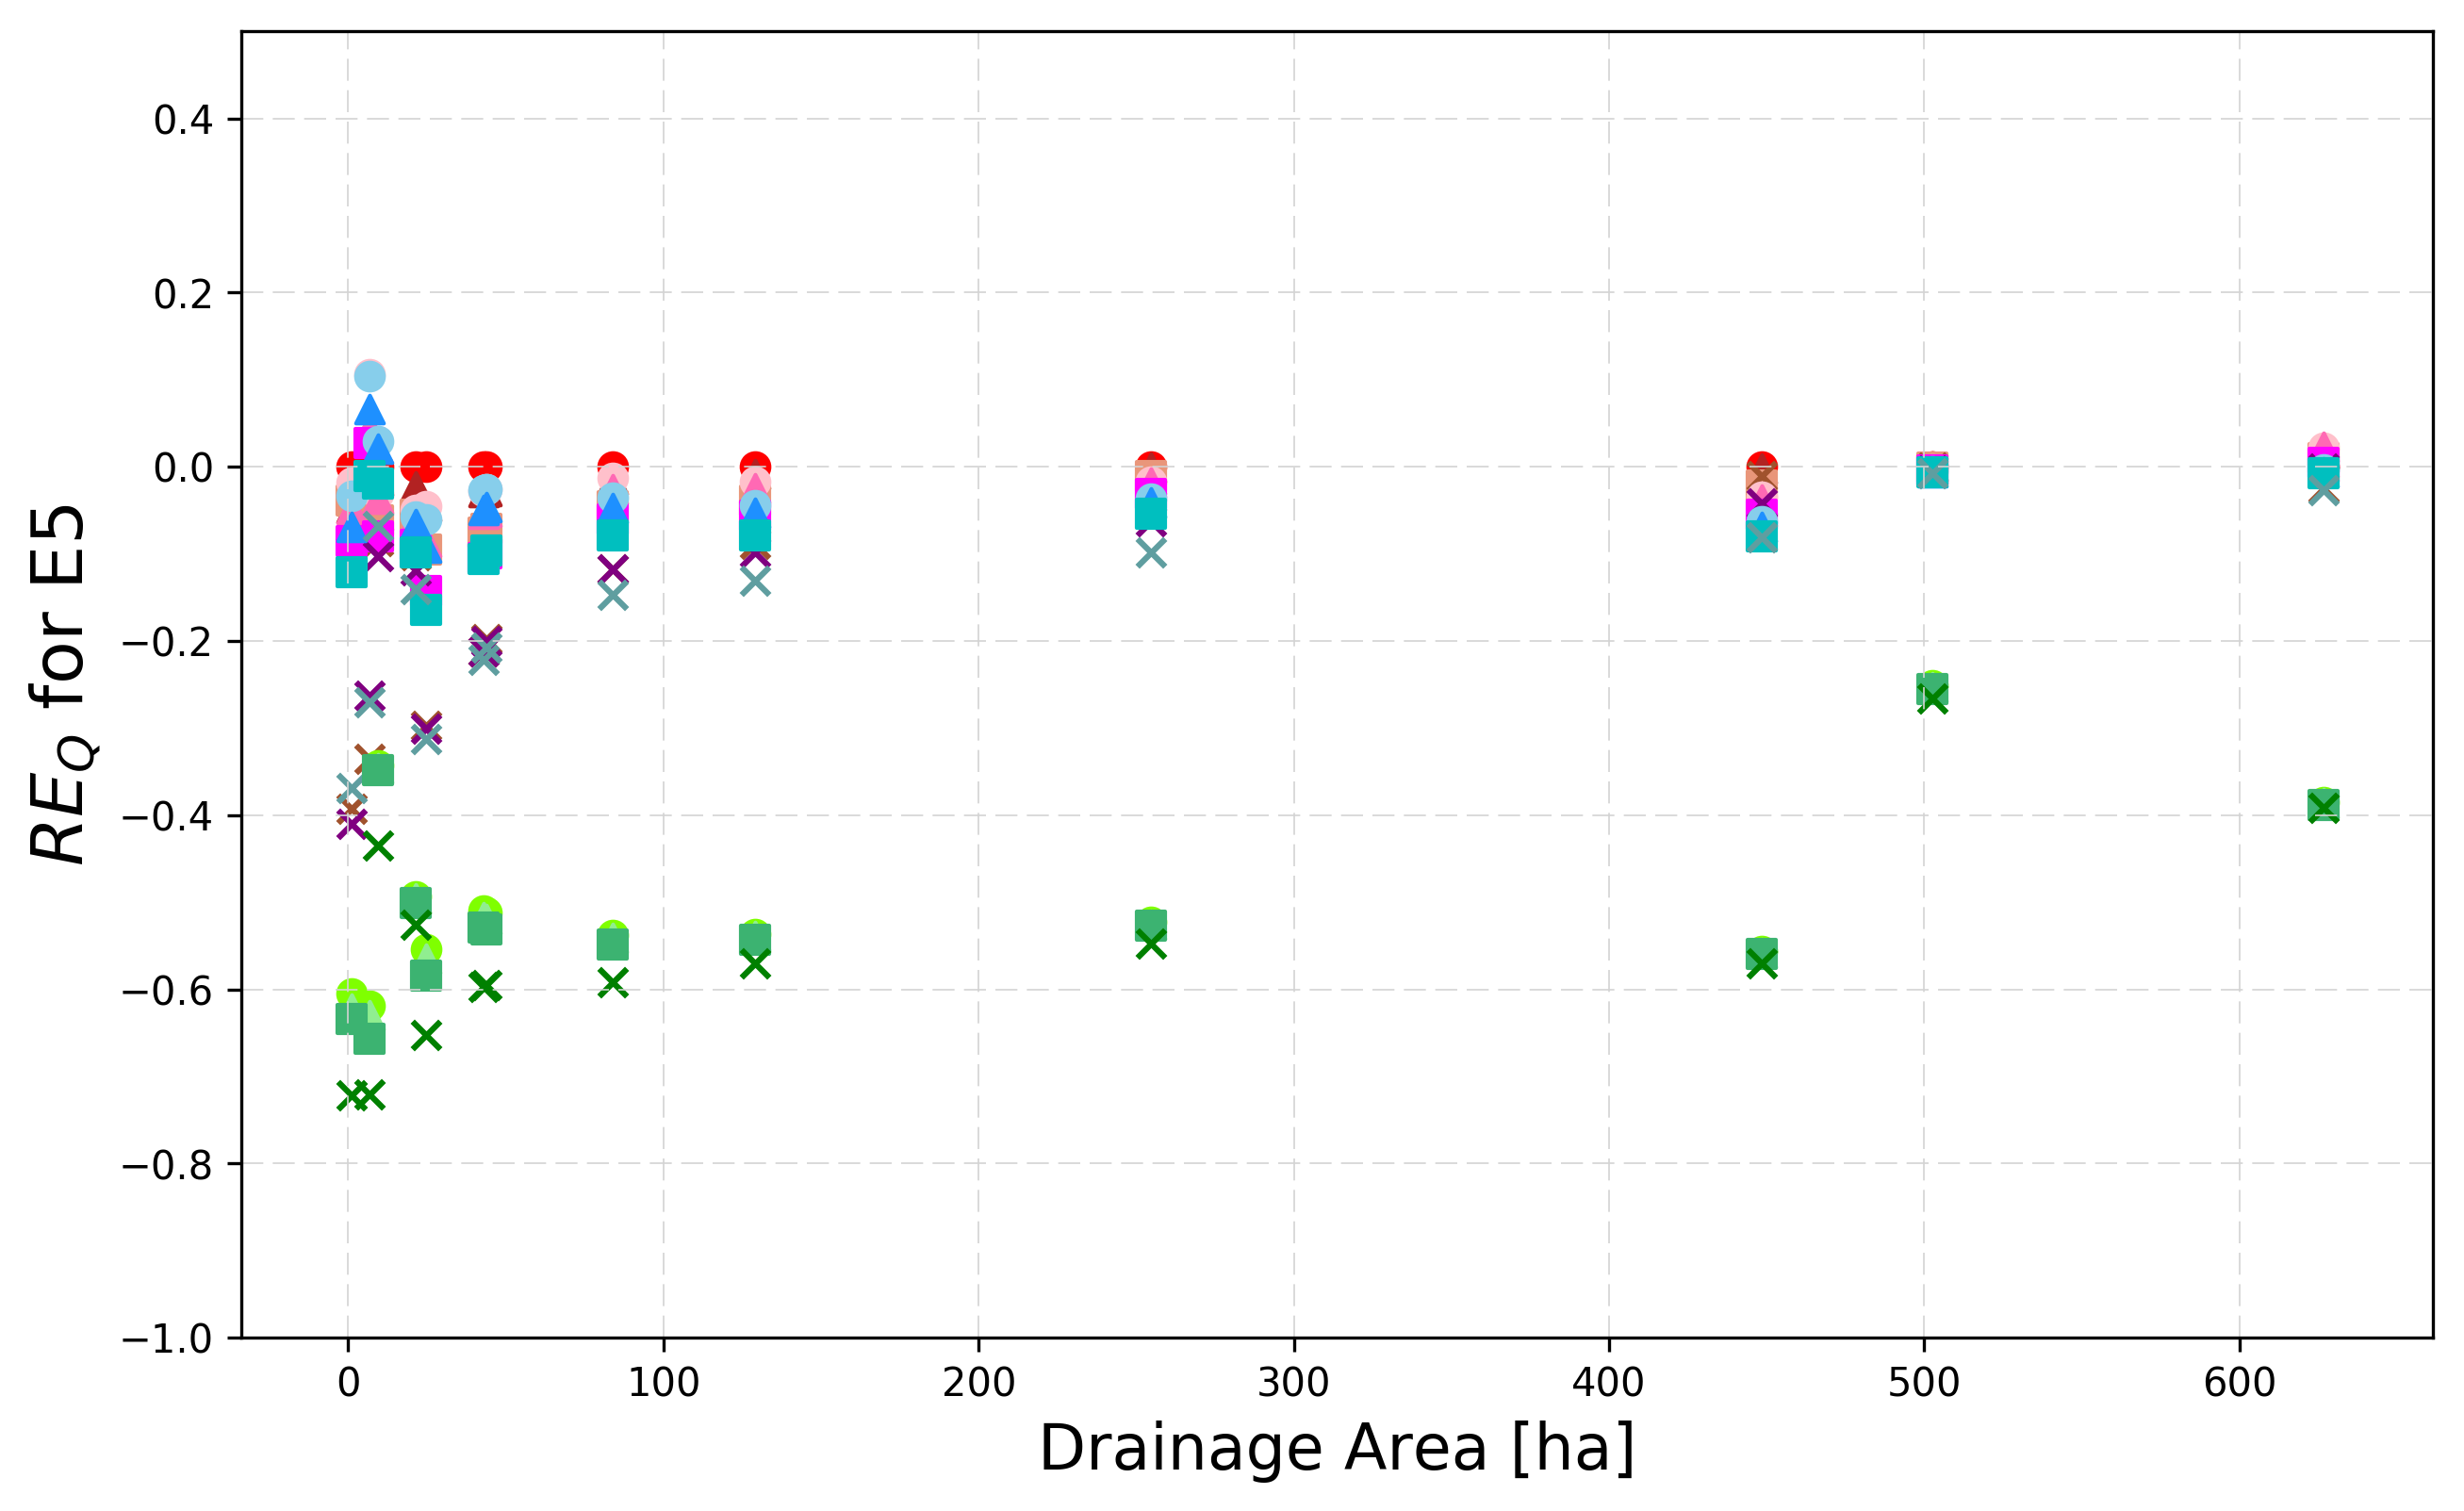

Supplement: Supplementary file 1 [file hess-22-2425-2018-supplement.zip › Flow/Flow3_RE_E5.png]

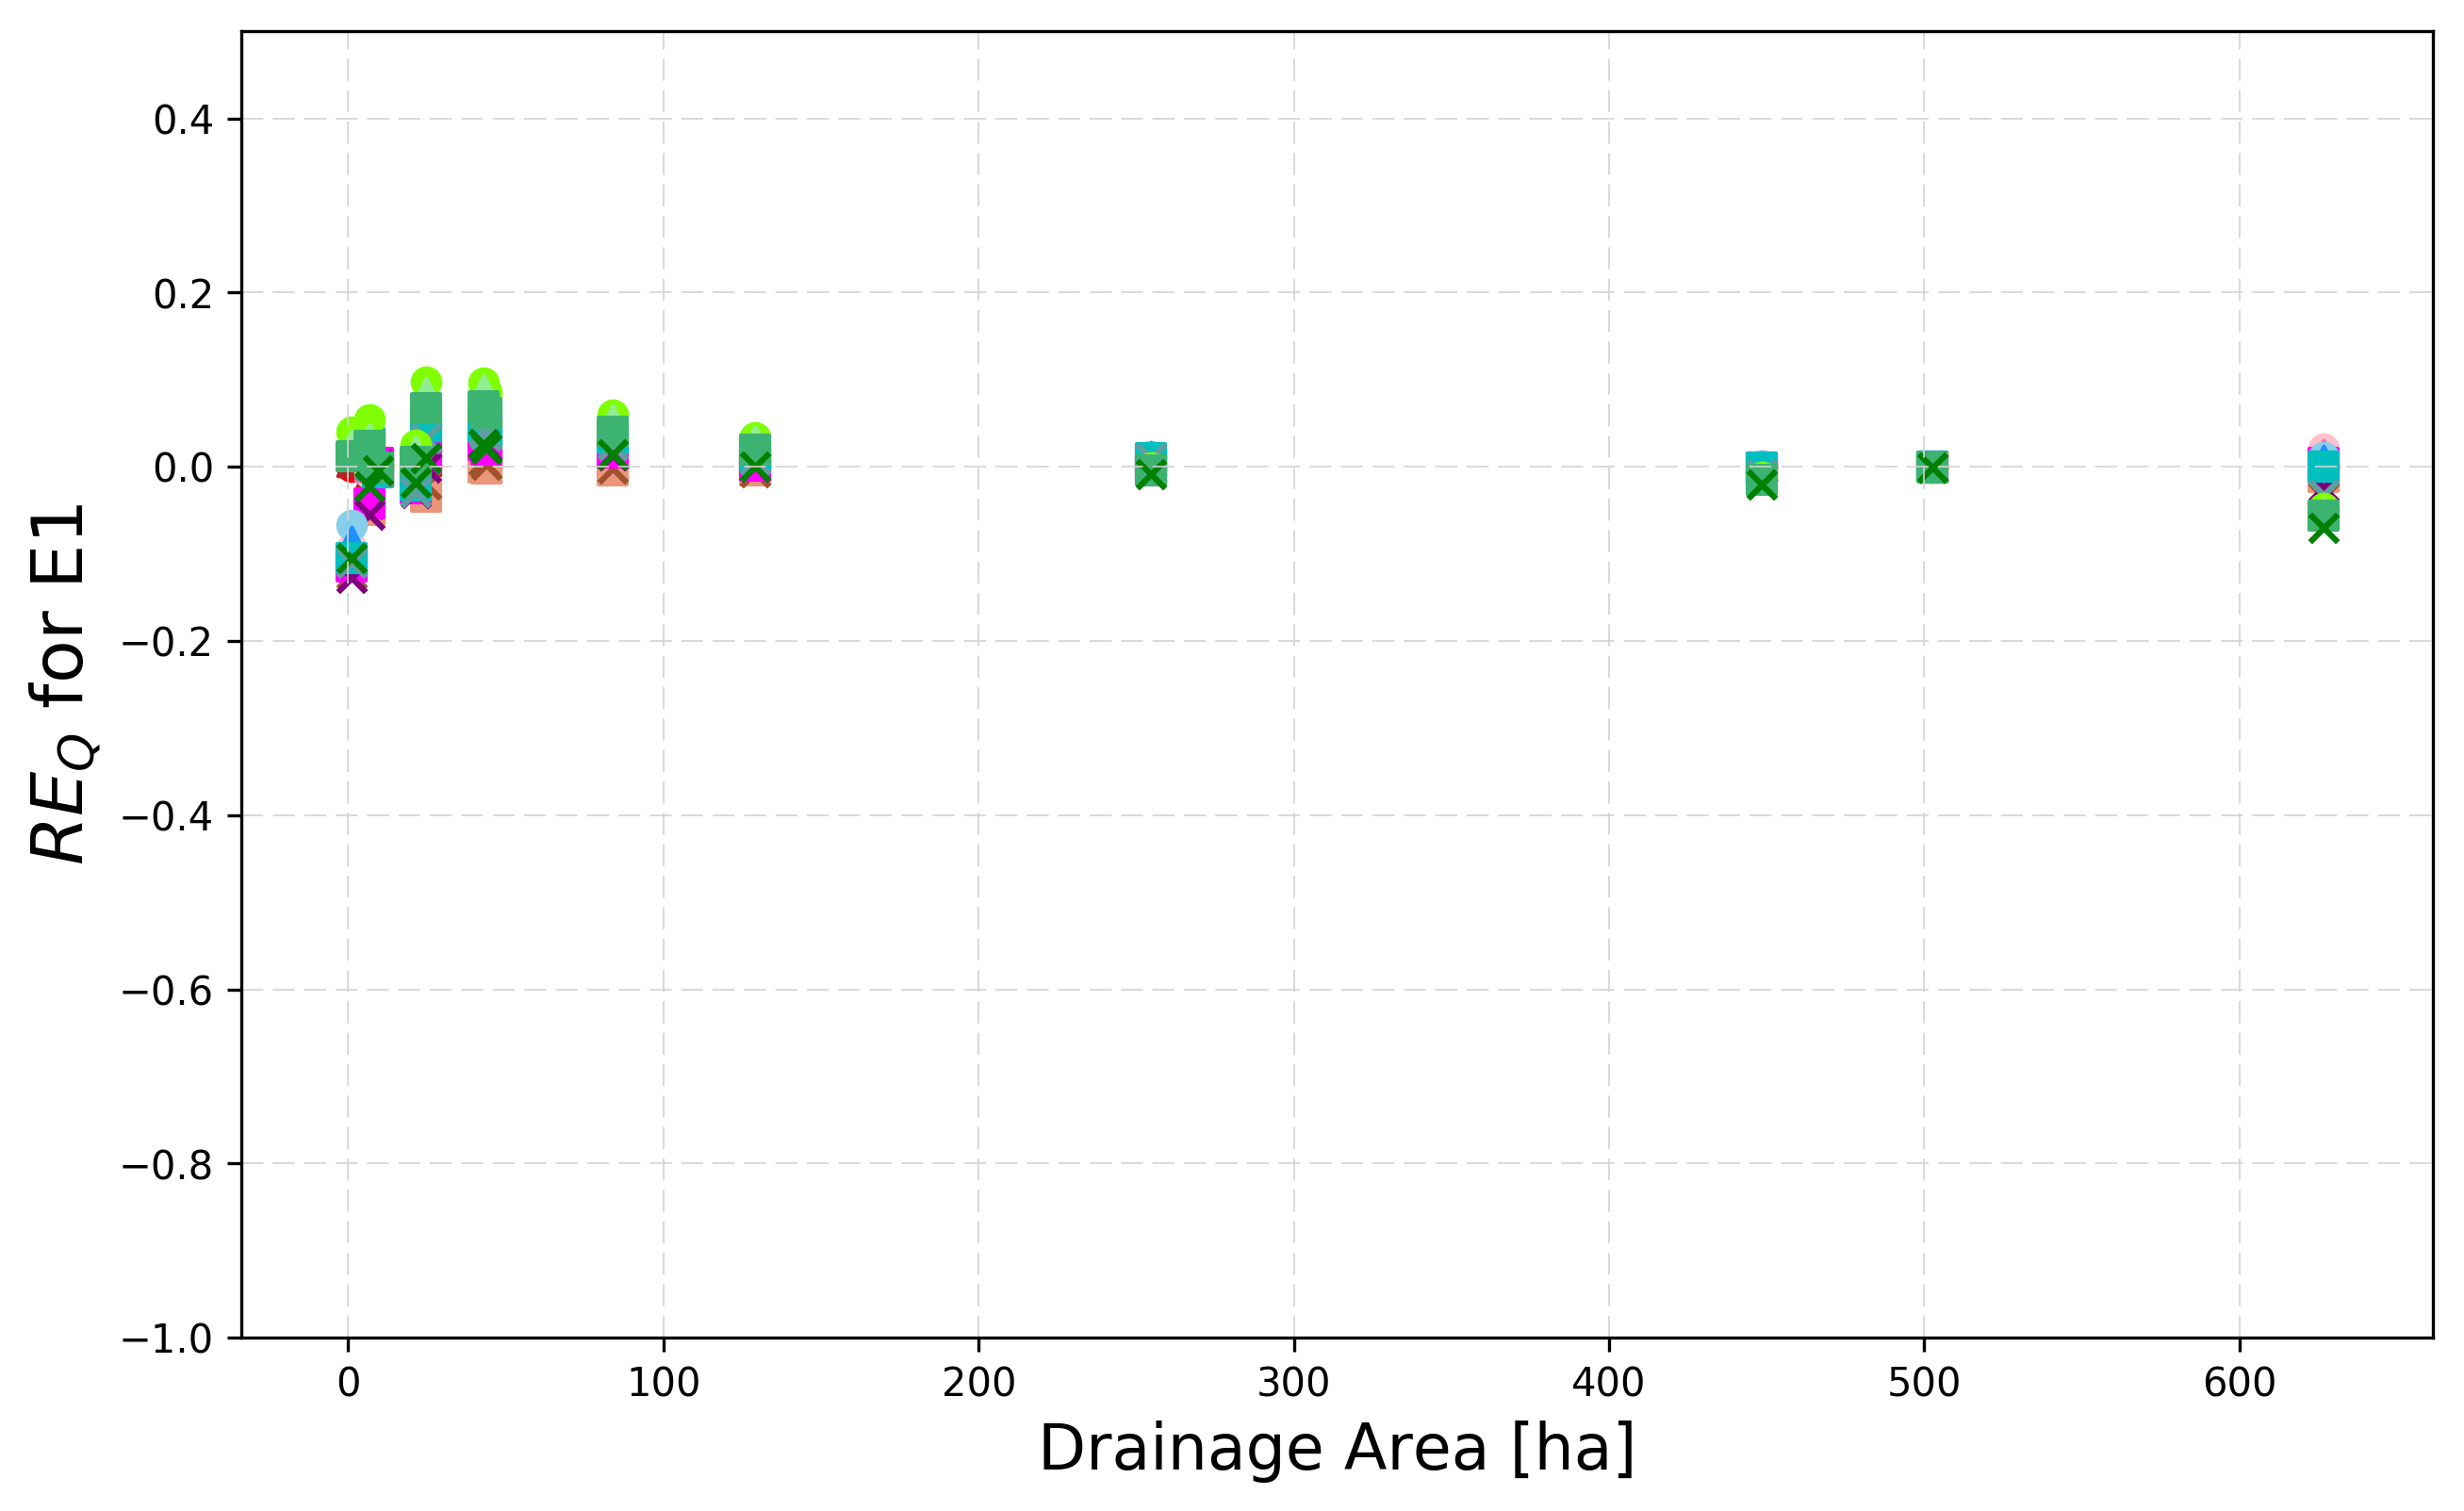

Supplement: Supplementary file 1 [file hess-22-2425-2018-supplement.zip › Flow/Flow3_RE_E1.png]

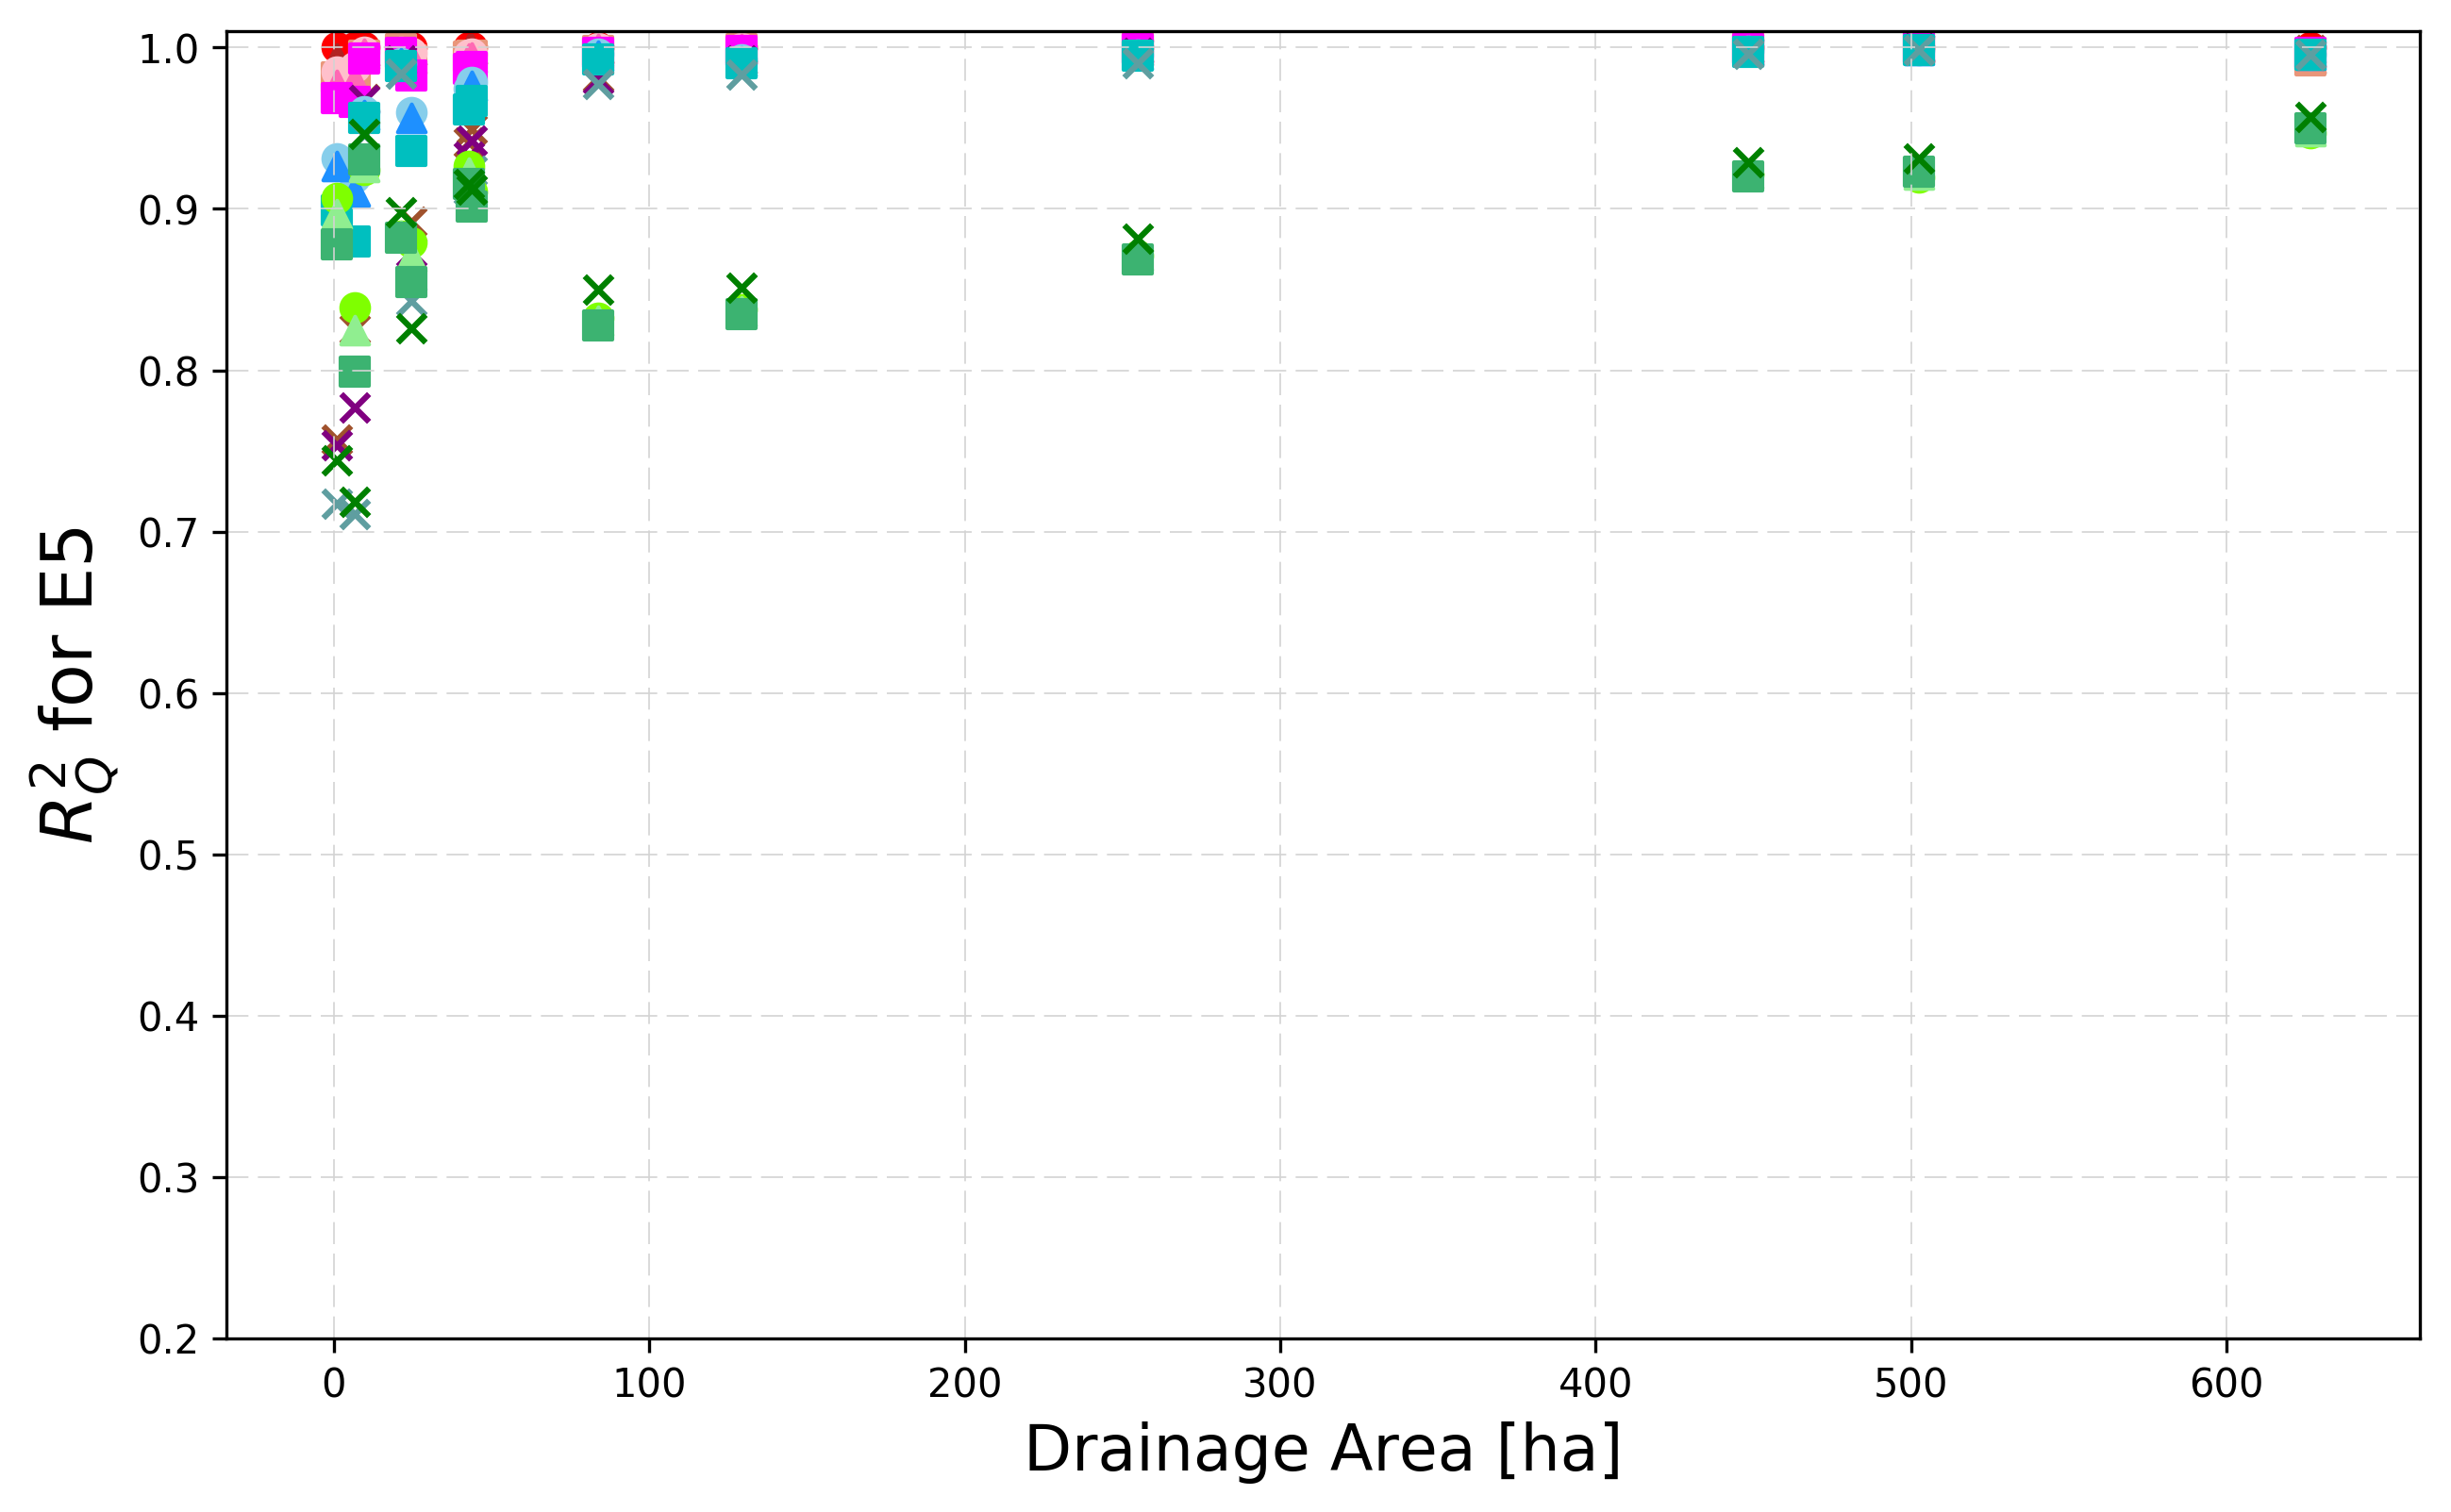

Supplement: Supplementary file 1 [file hess-22-2425-2018-supplement.zip › Flow/Flow3_R2_E5.png]

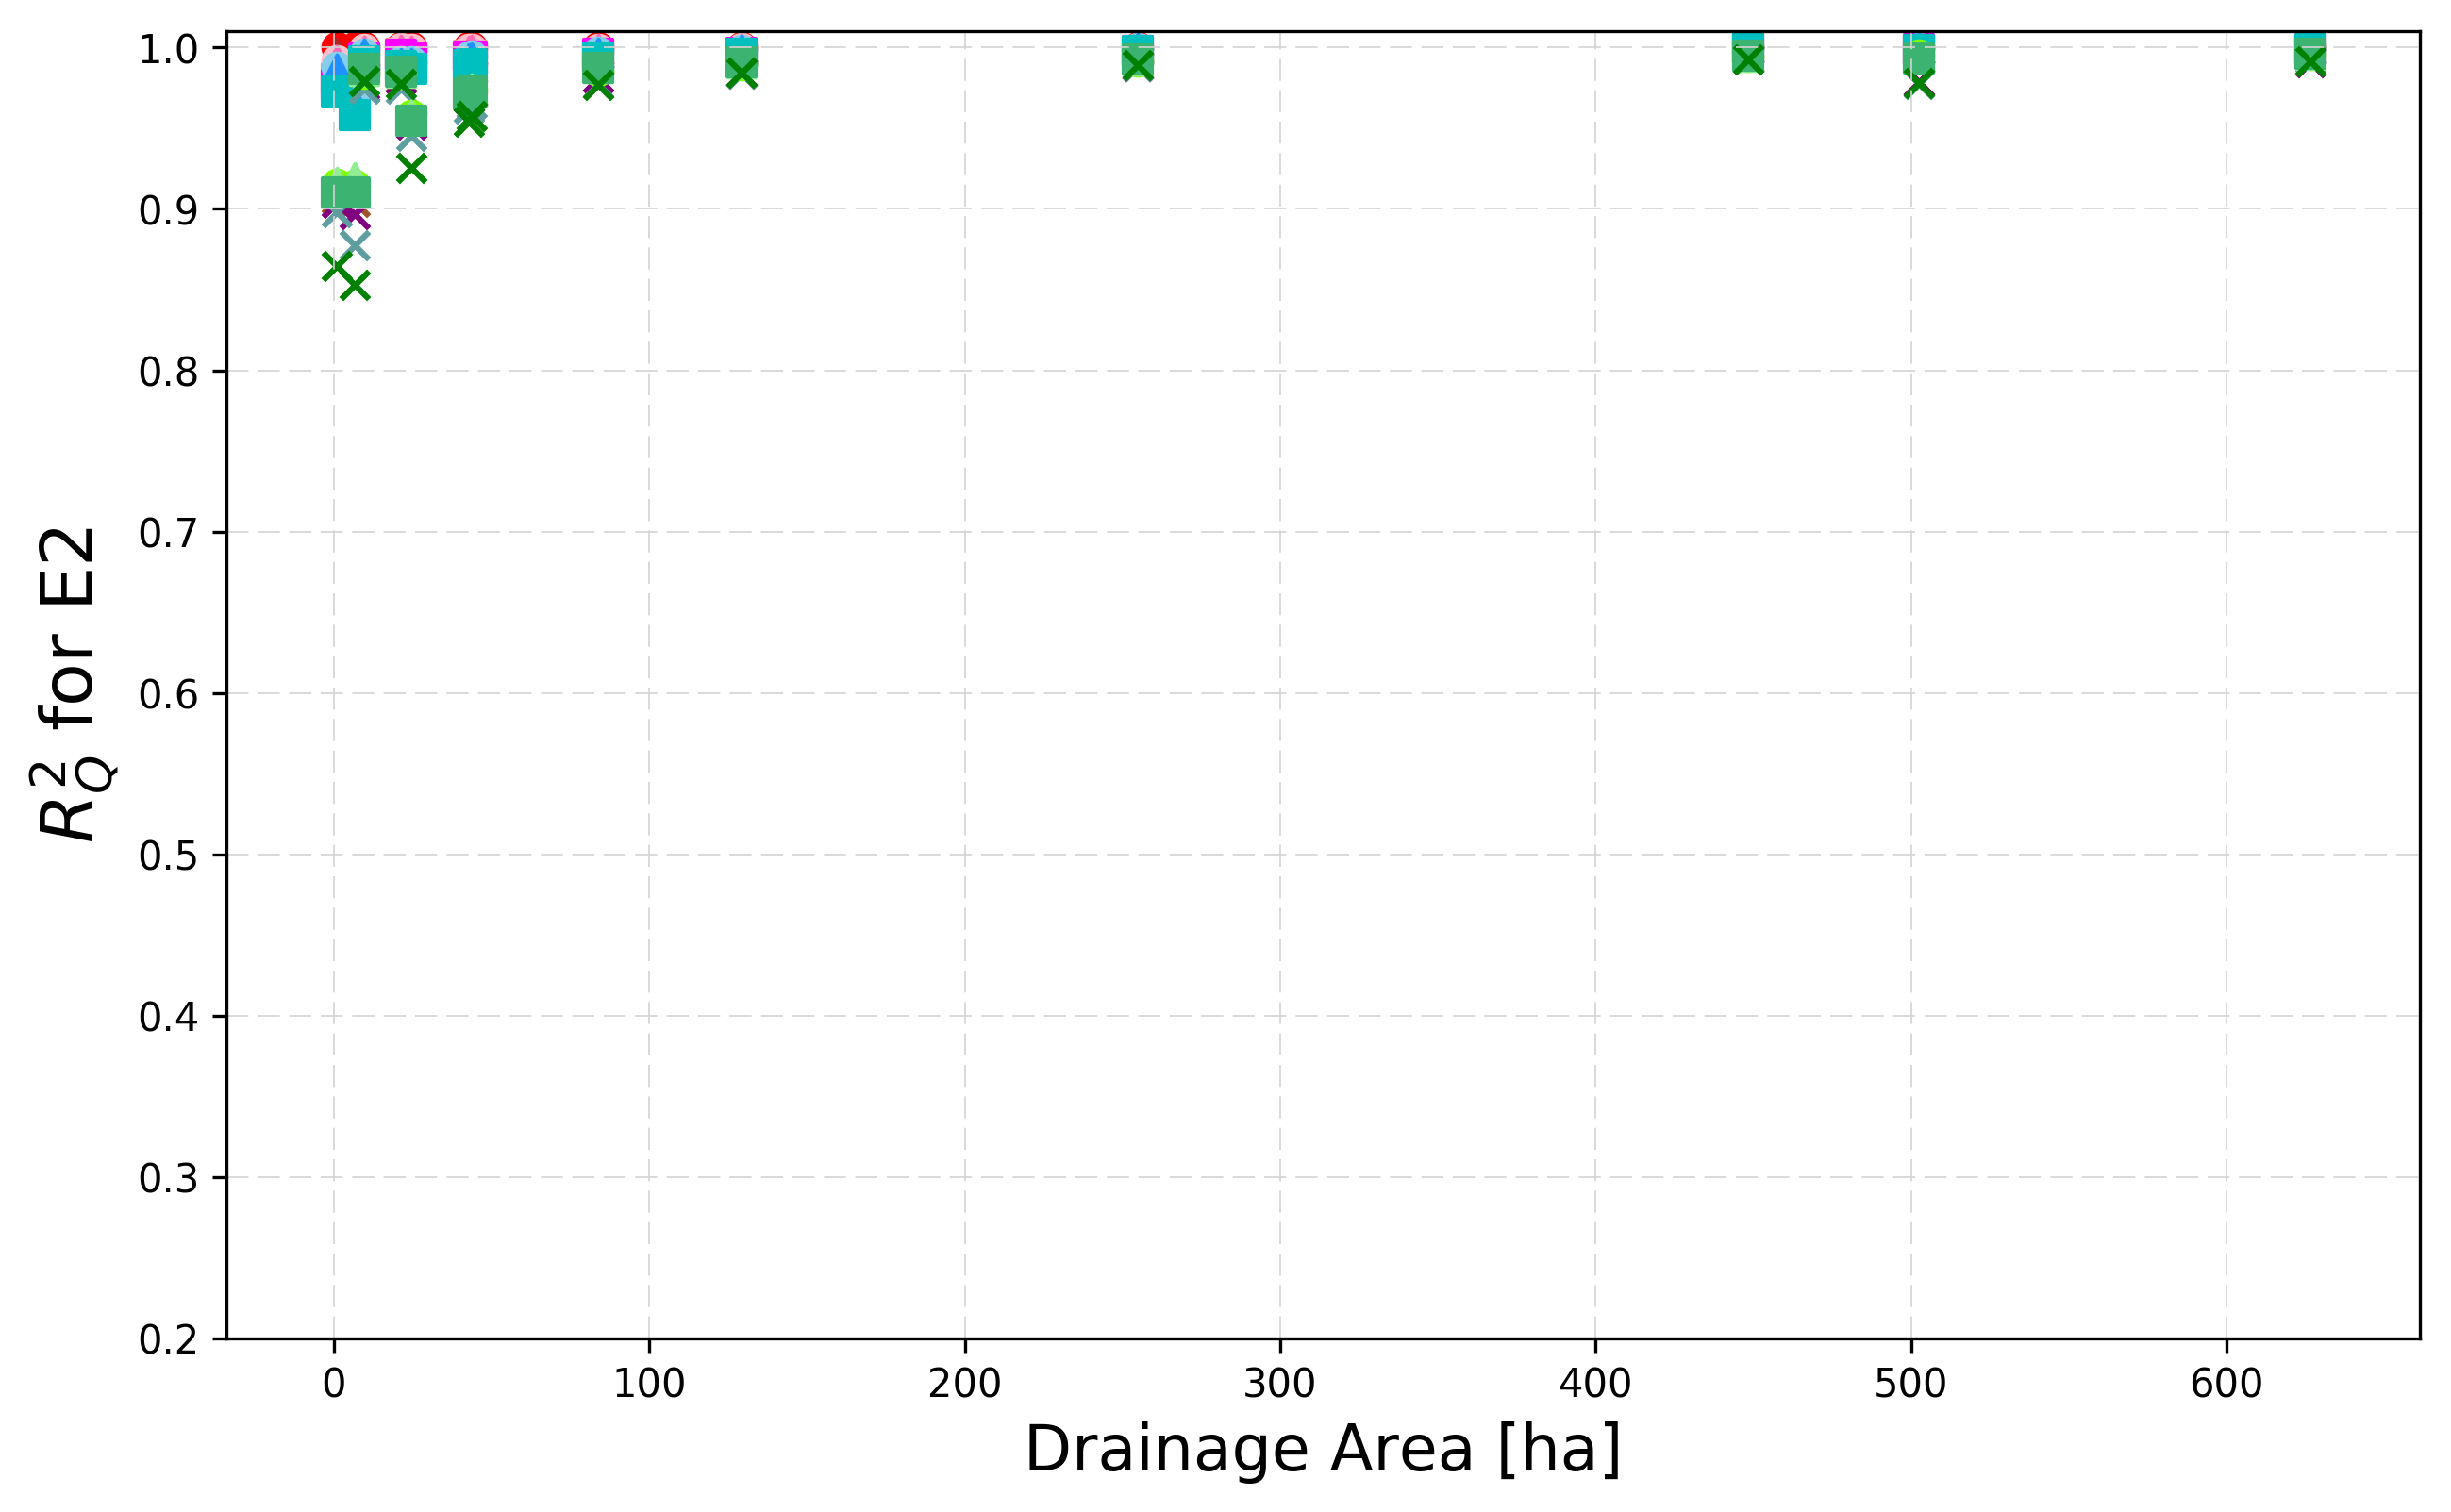

Supplement: Supplementary file 1 [file hess-22-2425-2018-supplement.zip › Flow/Flow3_R2_E2.png]

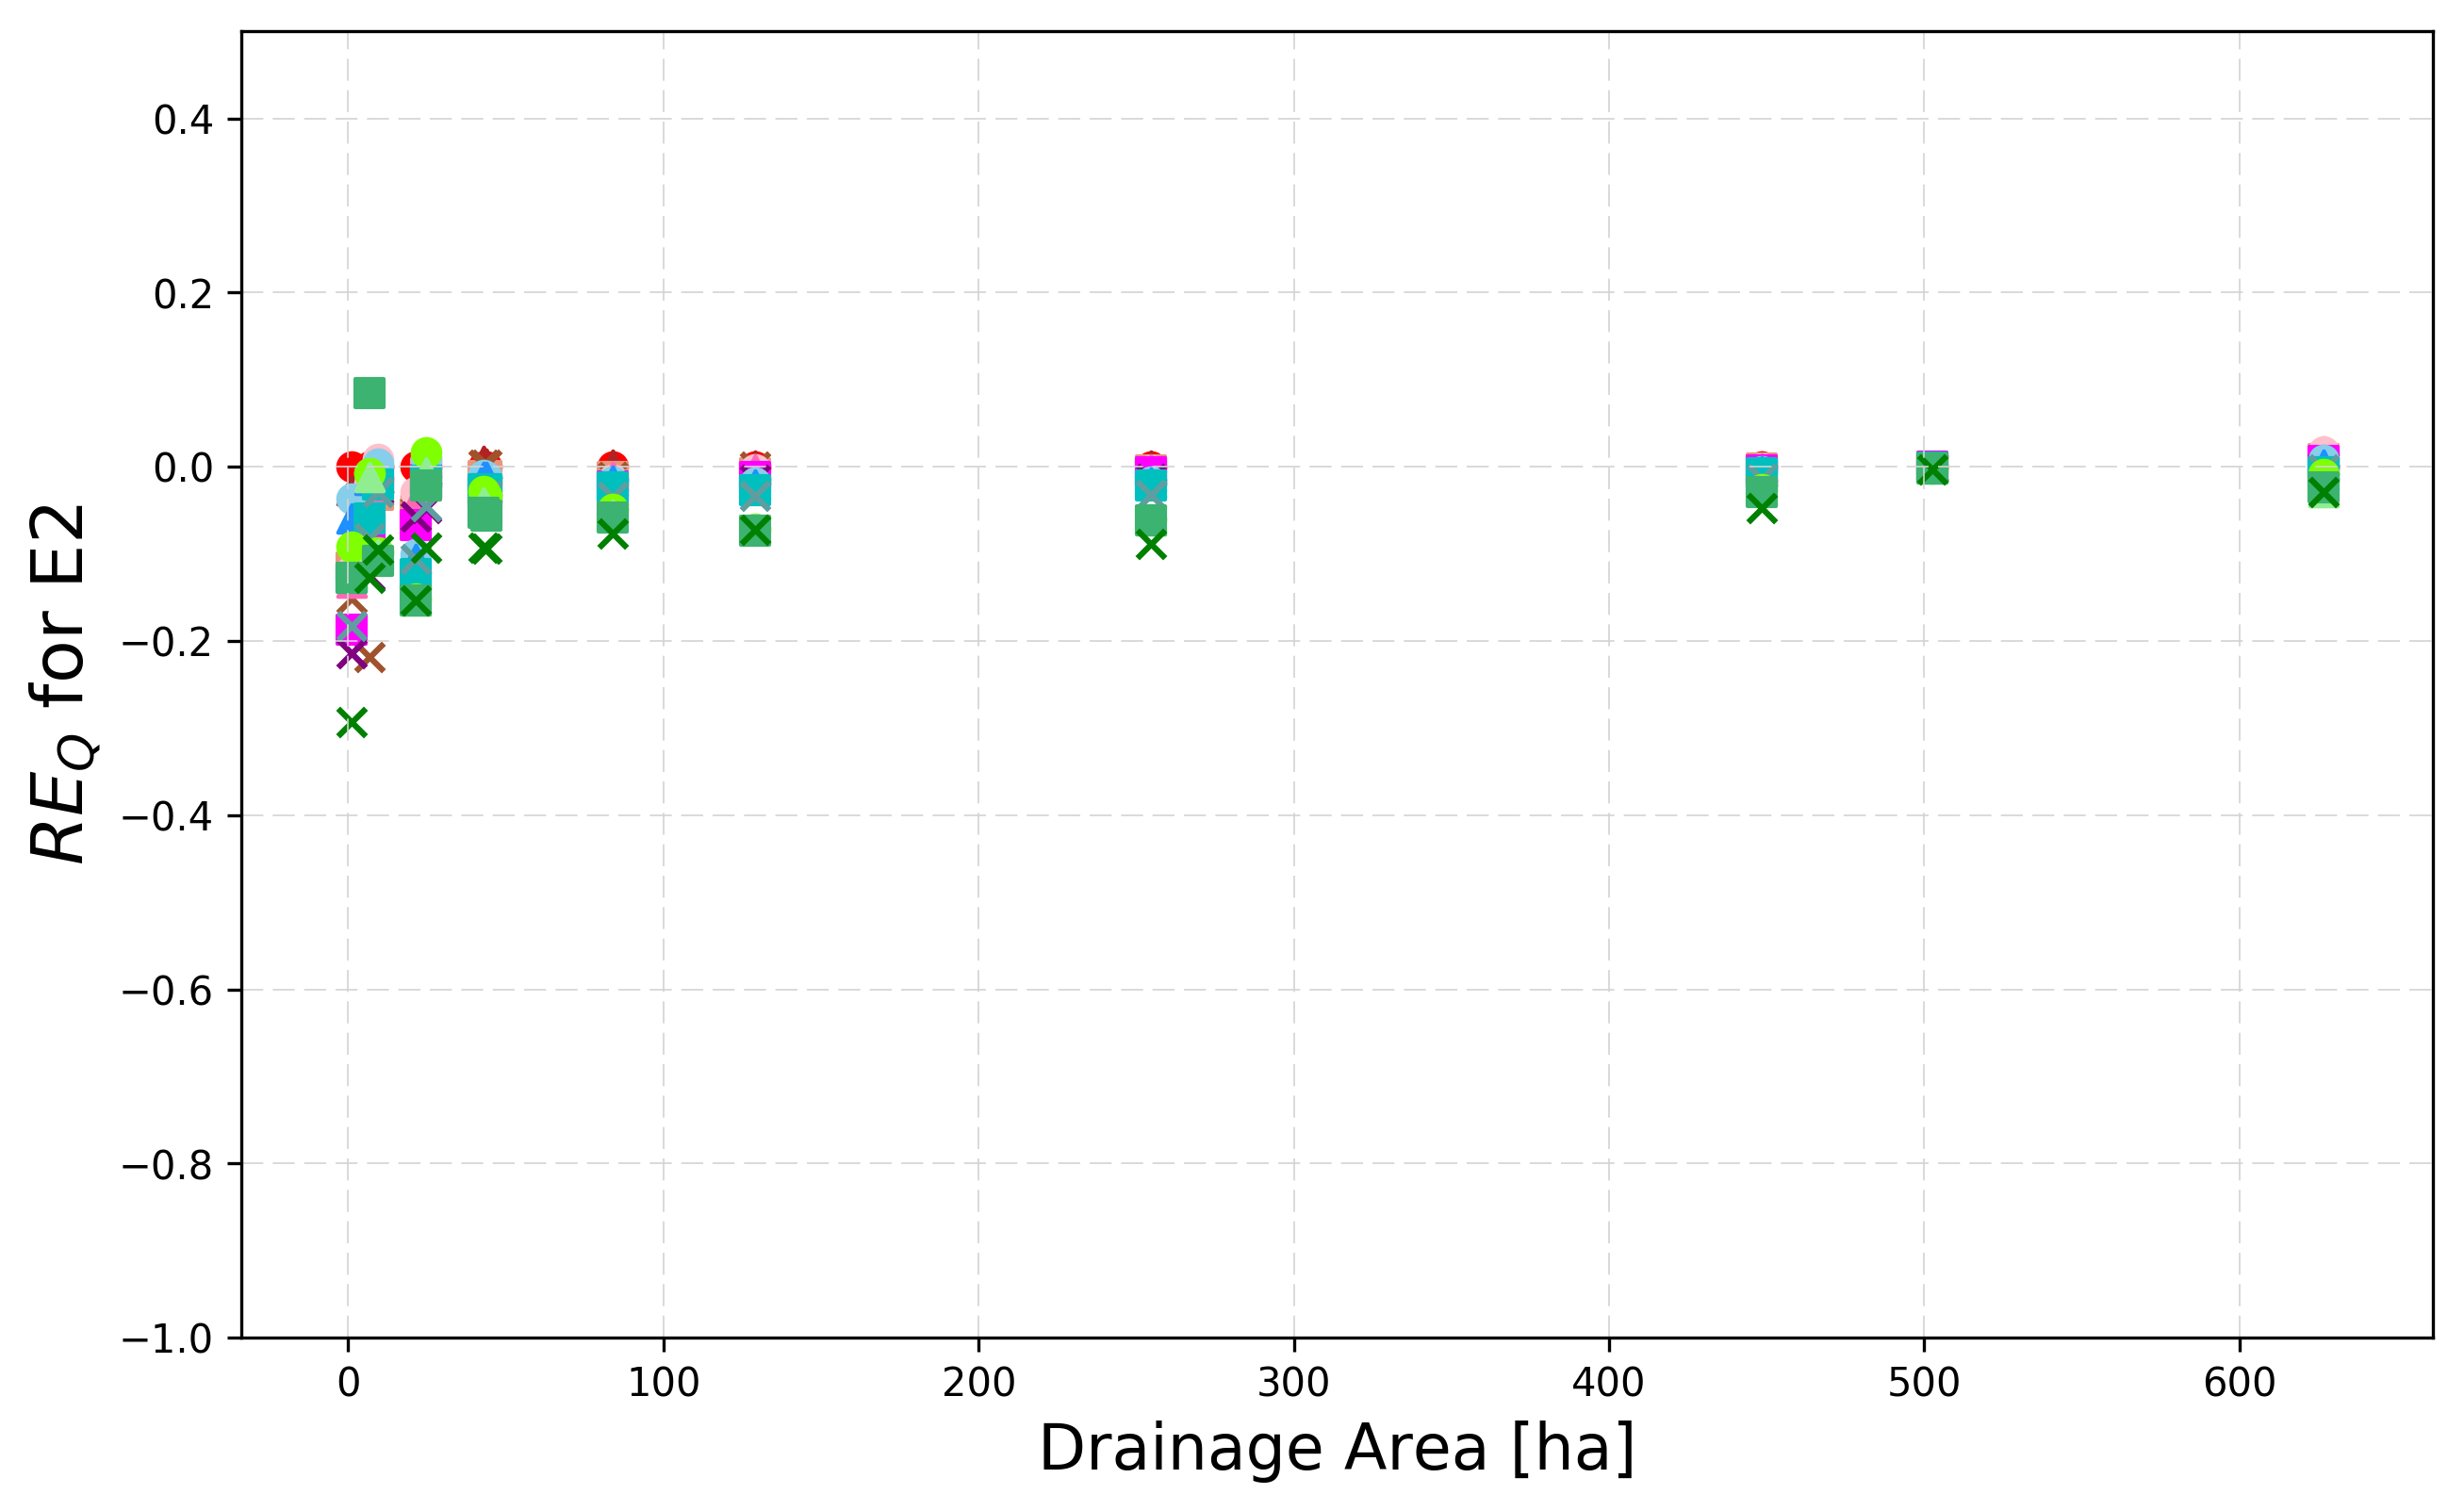

Supplement: Supplementary file 1 [file hess-22-2425-2018-supplement.zip › Flow/Flow3_RE_E2.png]

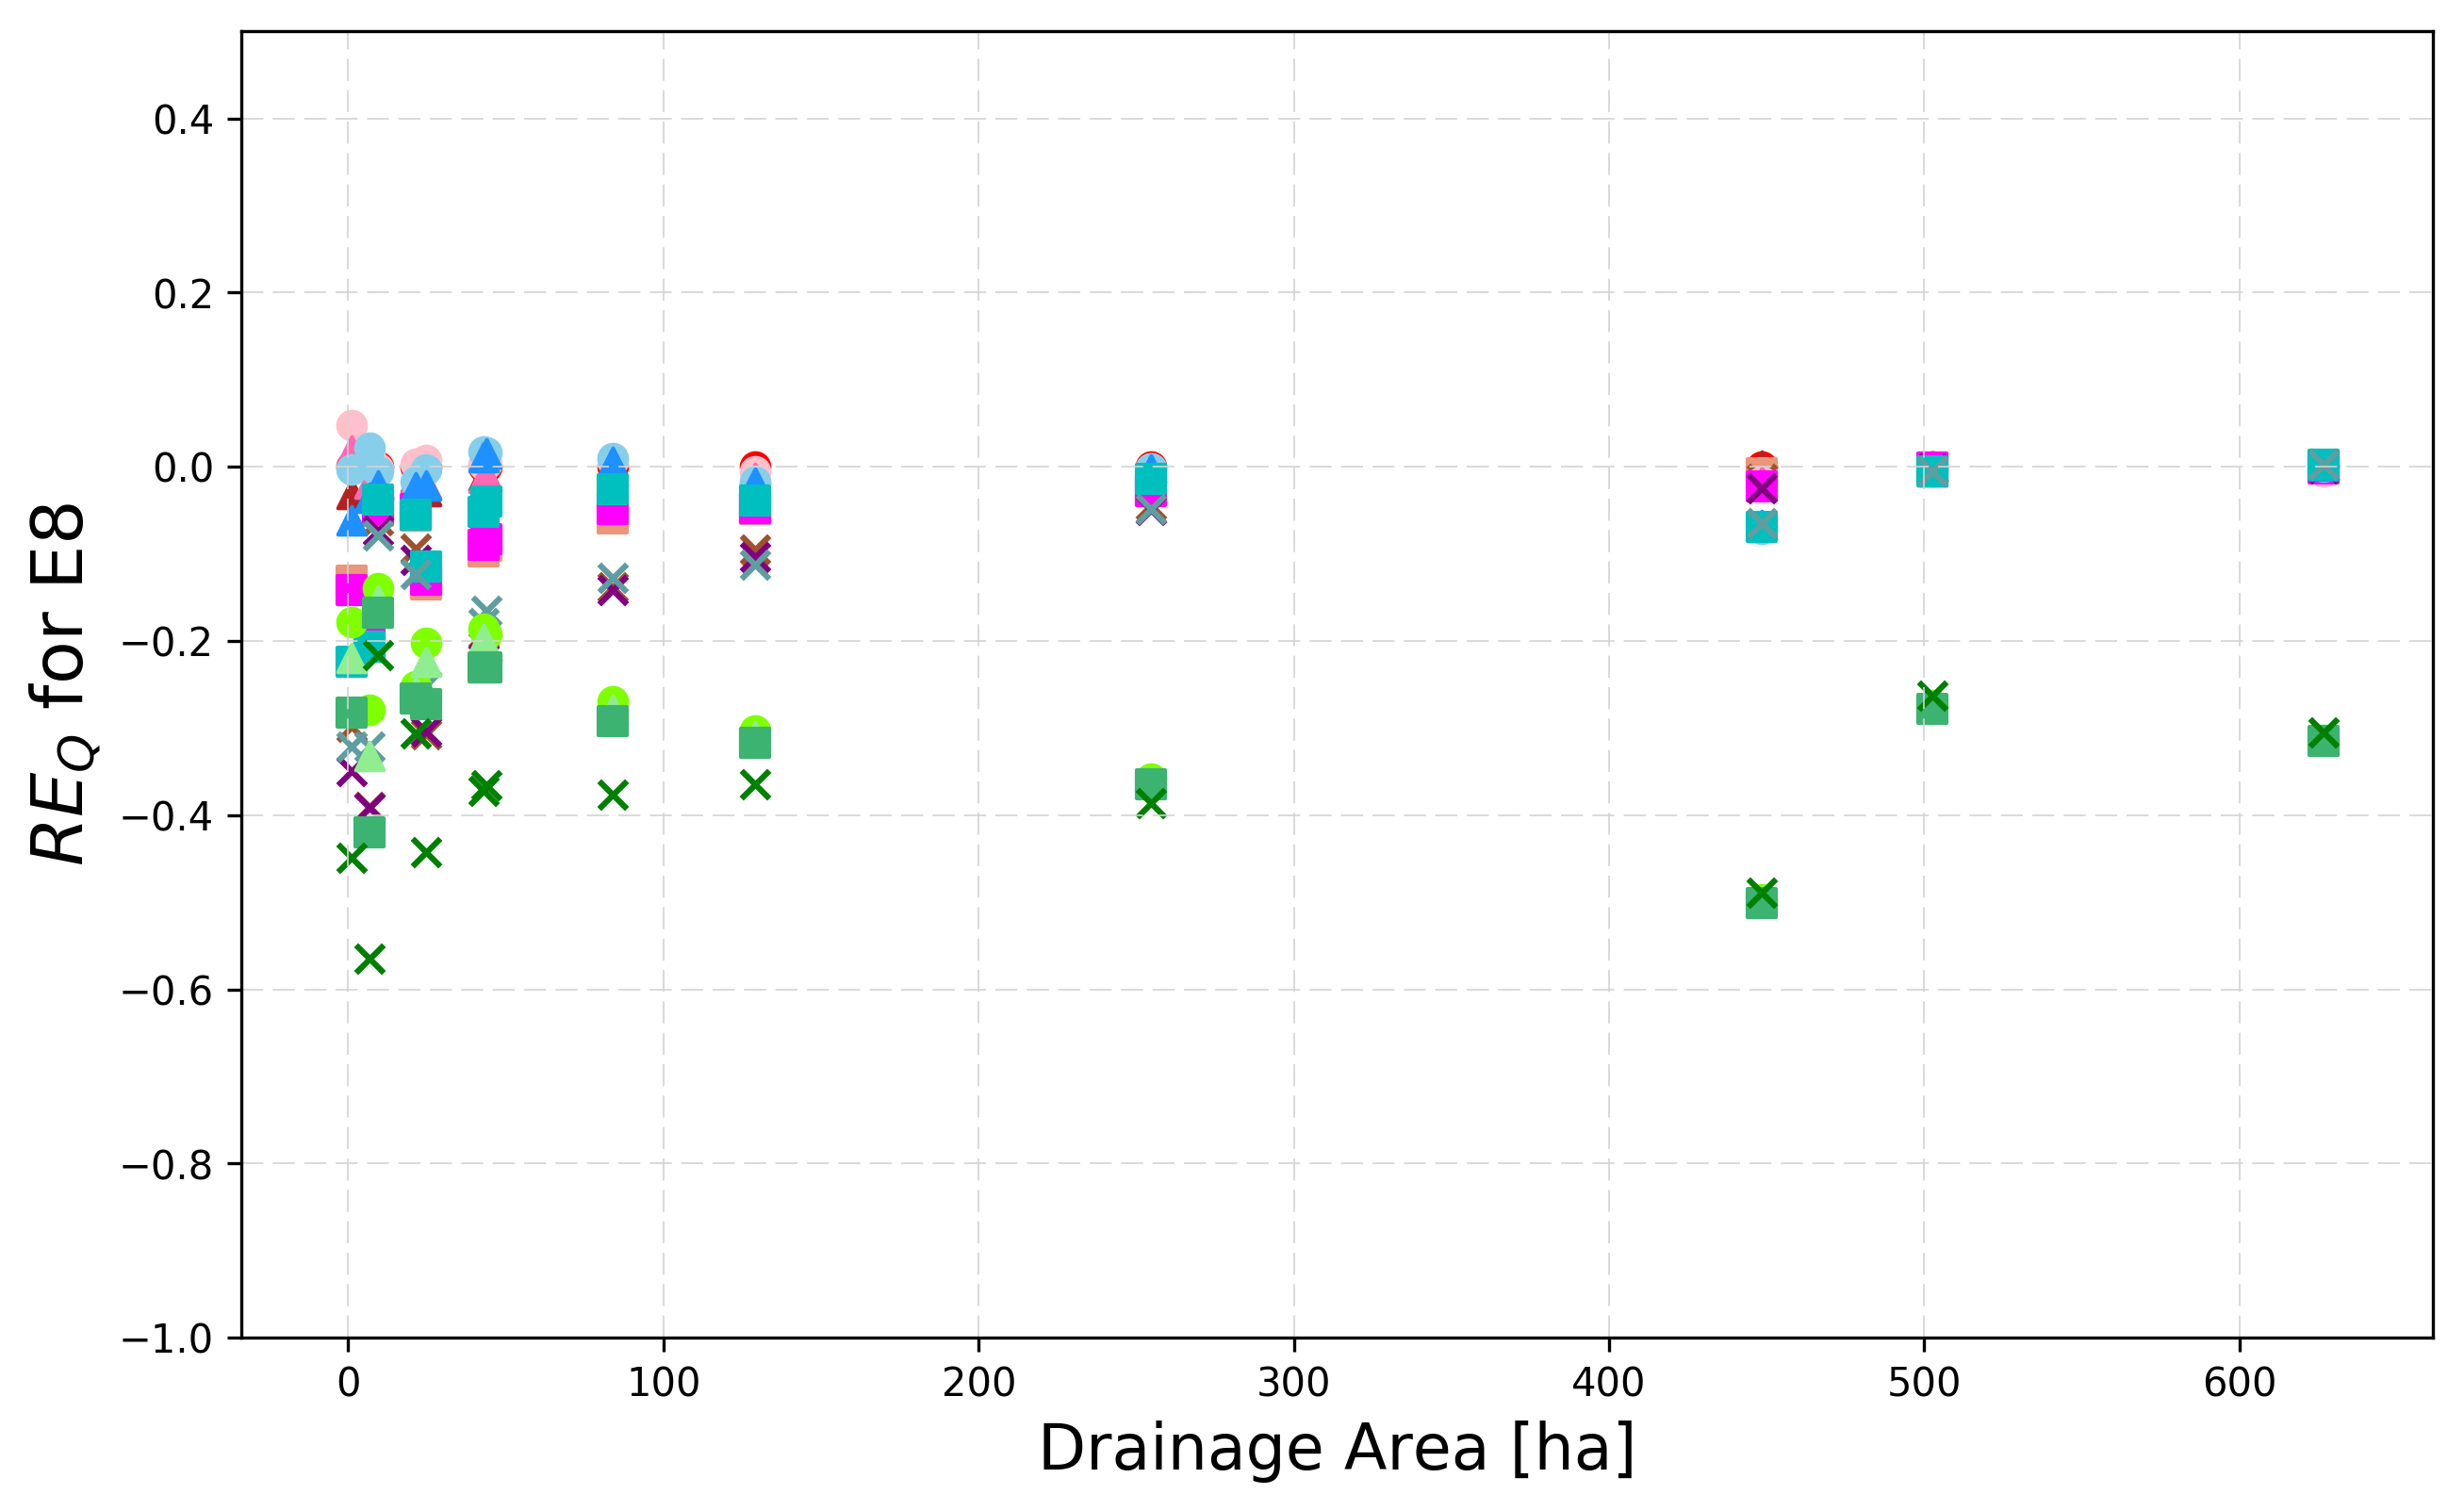

Supplement: Supplementary file 1 [file hess-22-2425-2018-supplement.zip › Flow/Flow3_RE_E8.png]

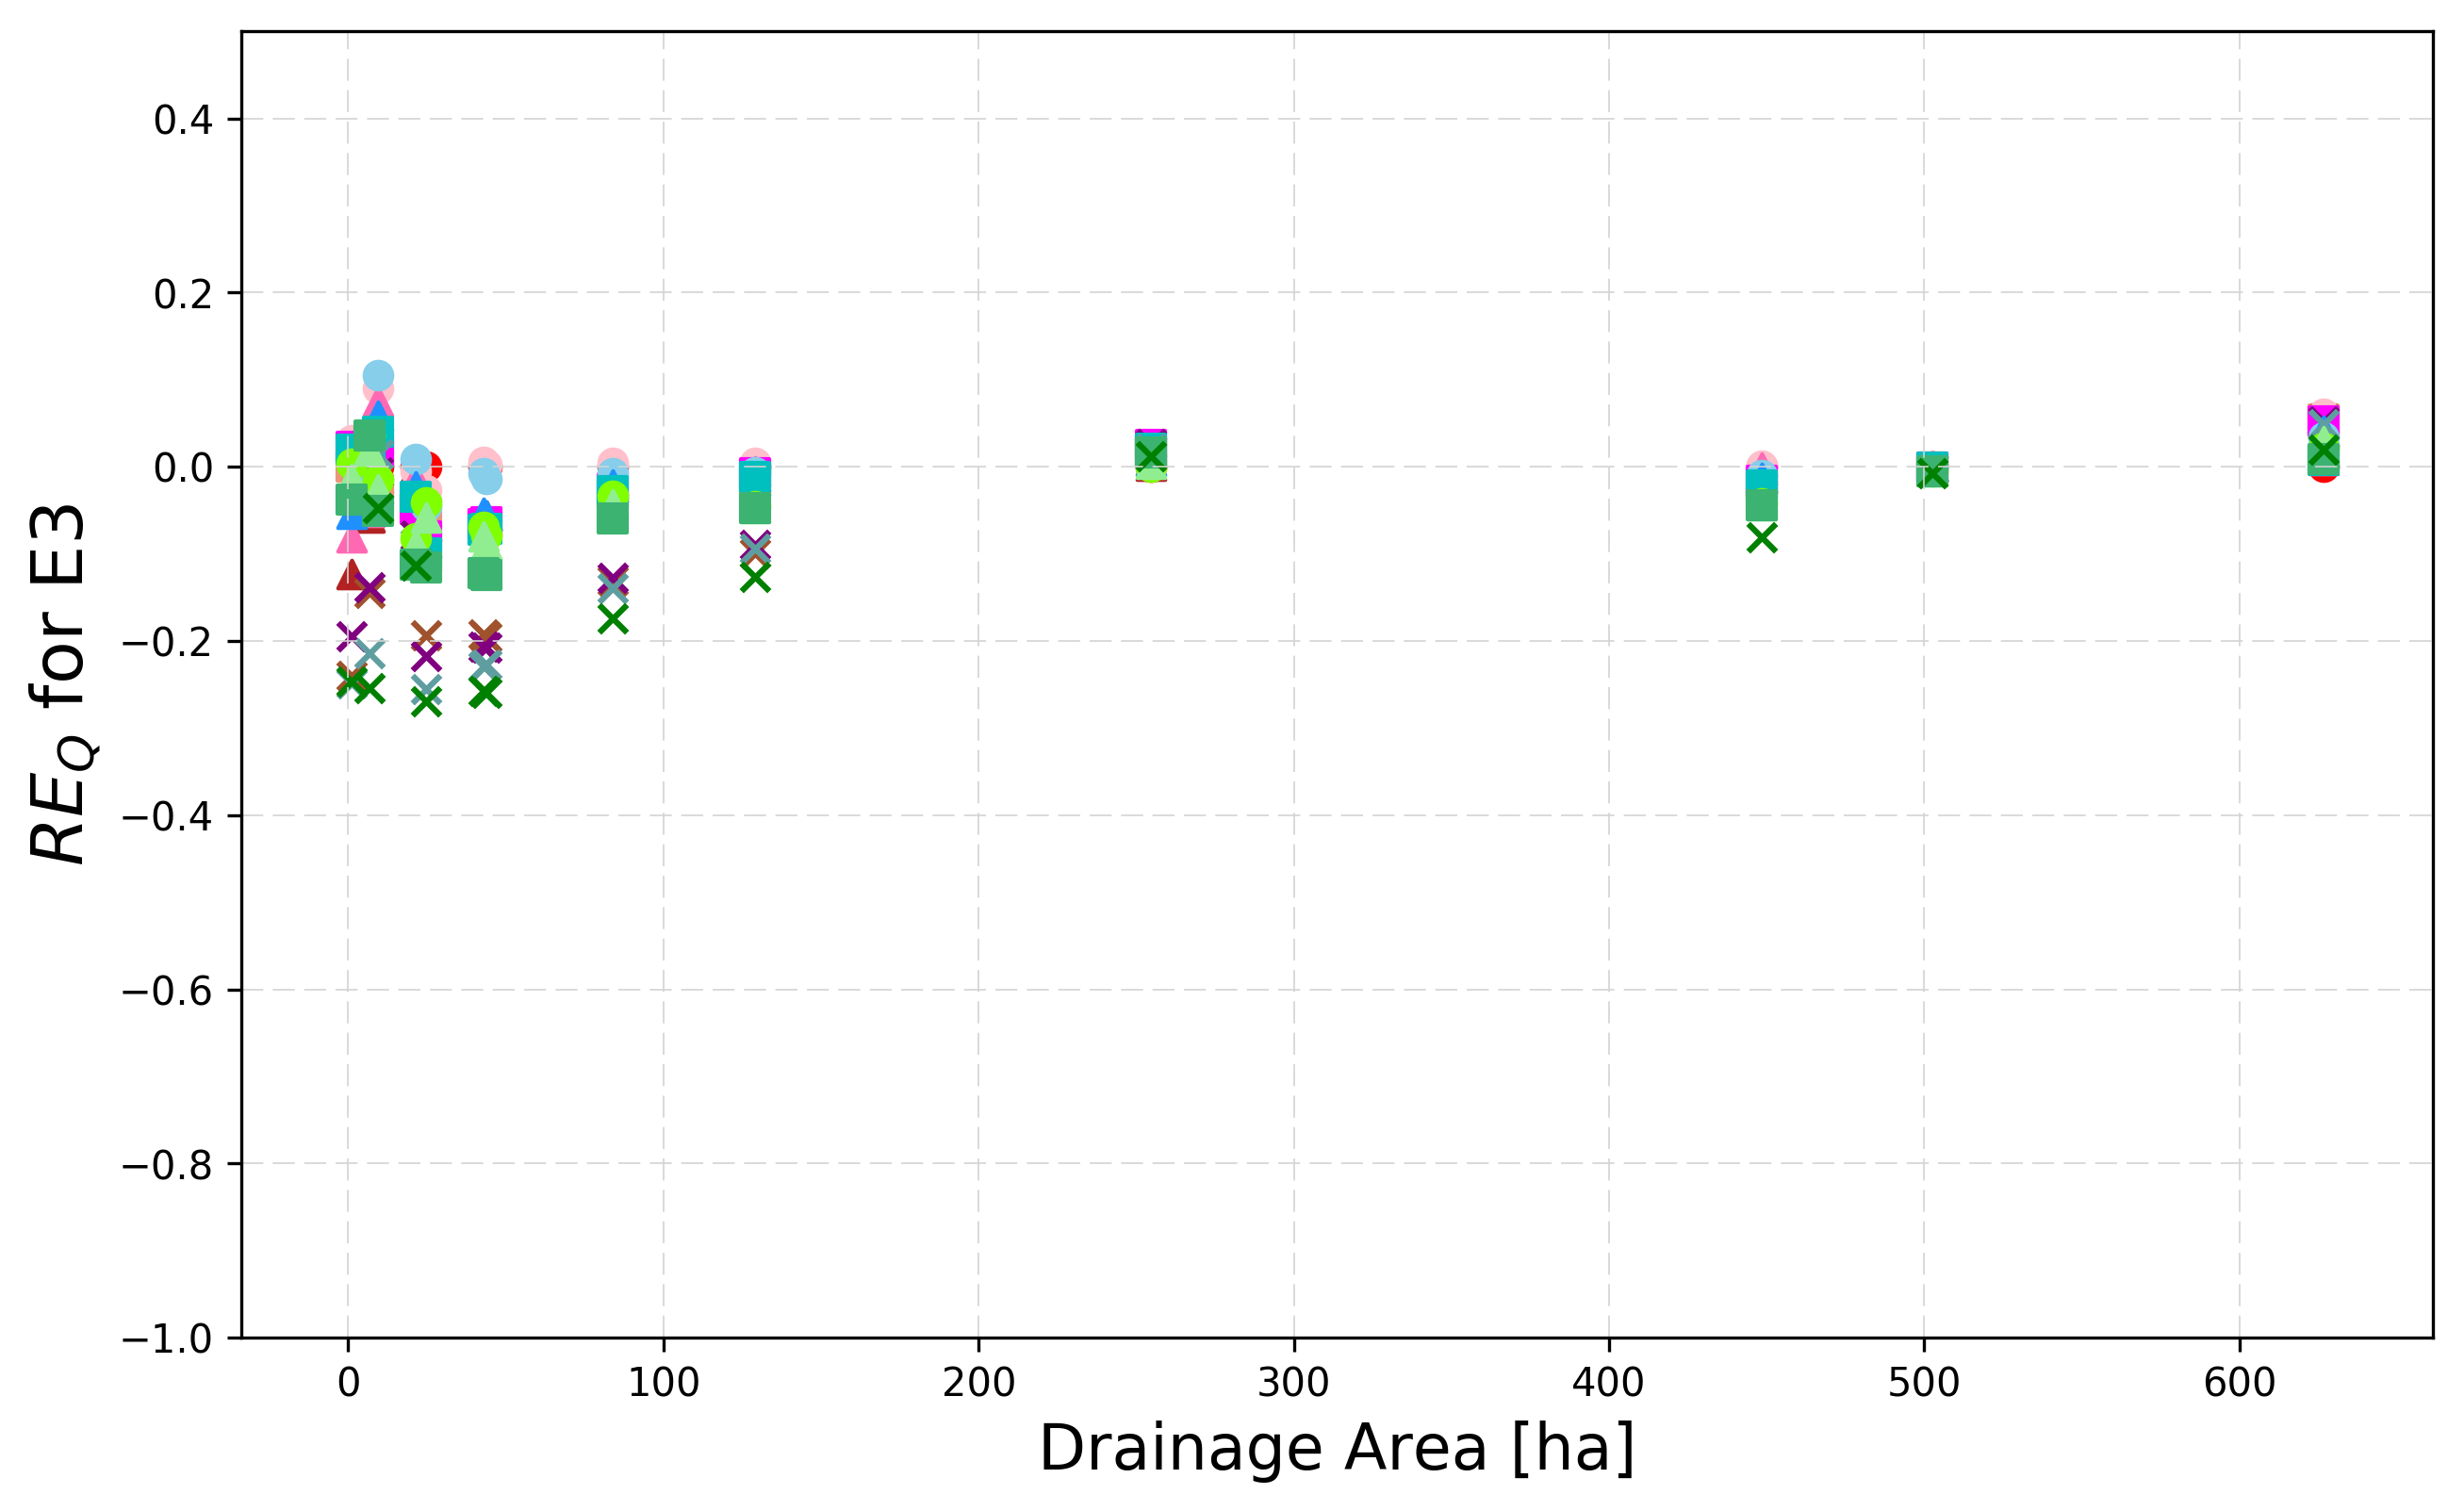

Supplement: Supplementary file 1 [file hess-22-2425-2018-supplement.zip › Flow/Flow3_RE_E3.png]

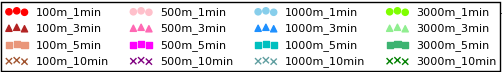

Supplement: Supplementary file 1 [file hess-22-2425-2018-supplement.zip › Flow/Legg.png]

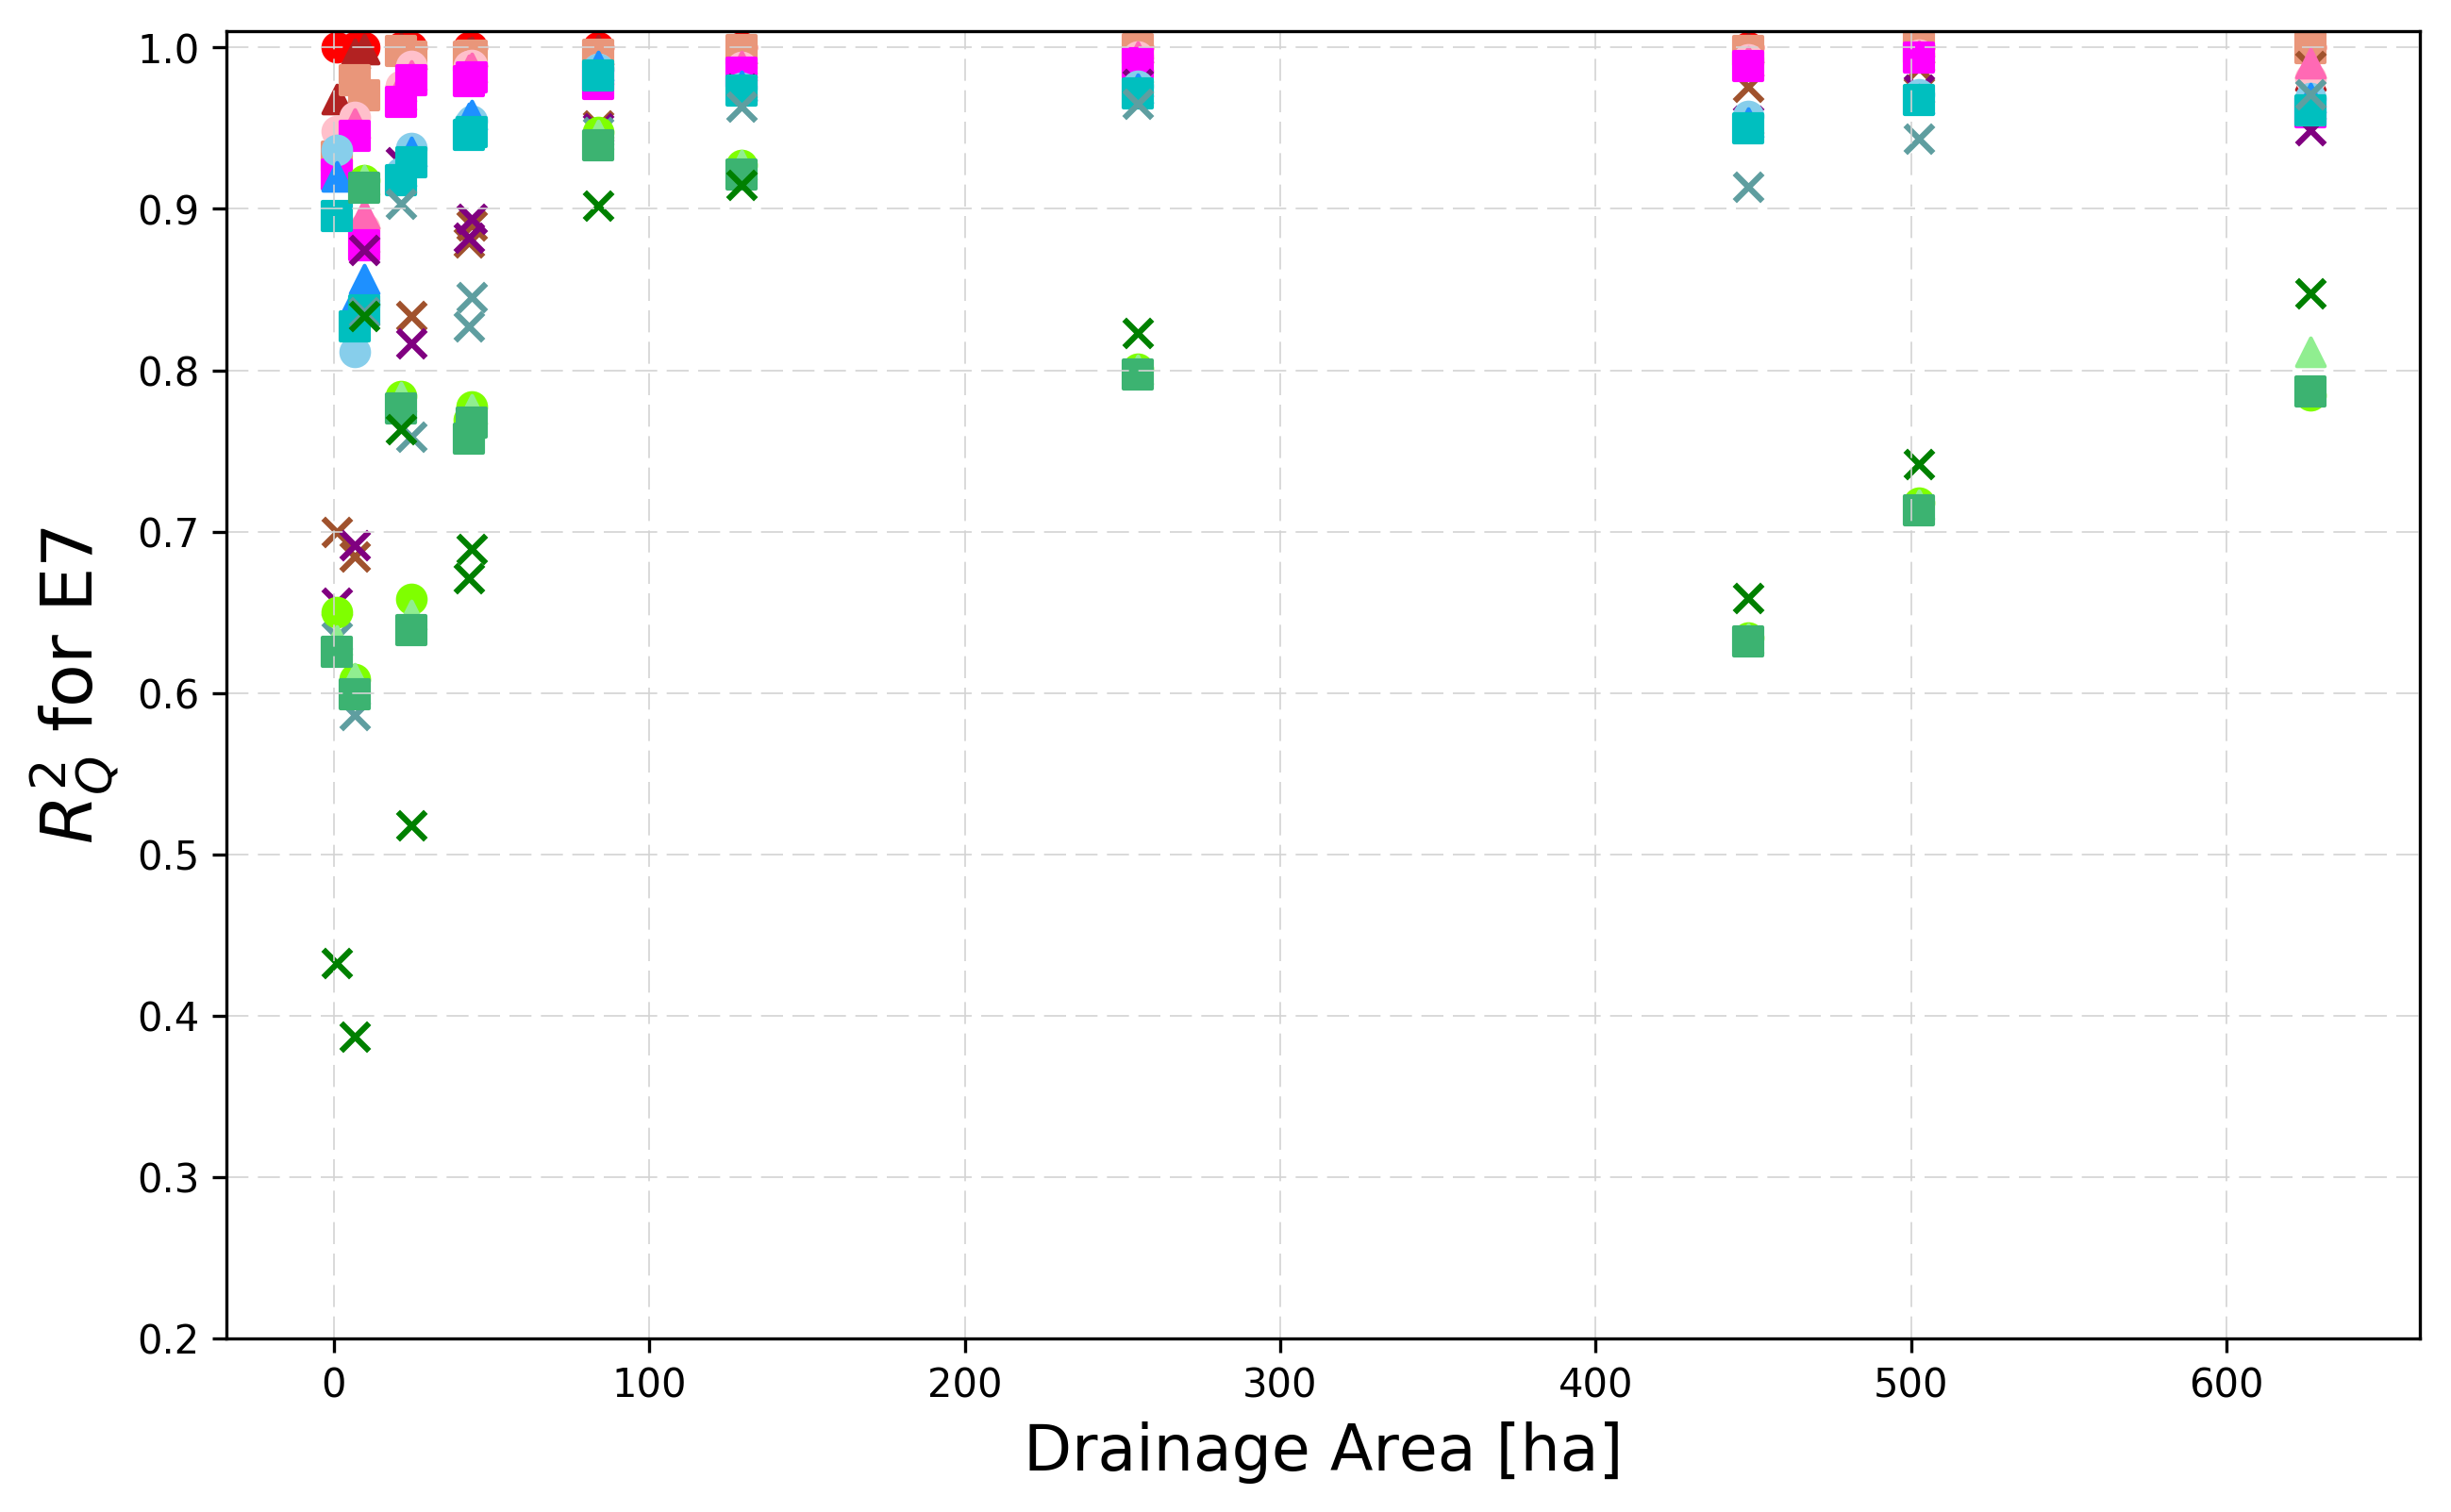

Supplement: Supplementary file 1 [file hess-22-2425-2018-supplement.zip › Flow/Flow3_R2_E7.png]

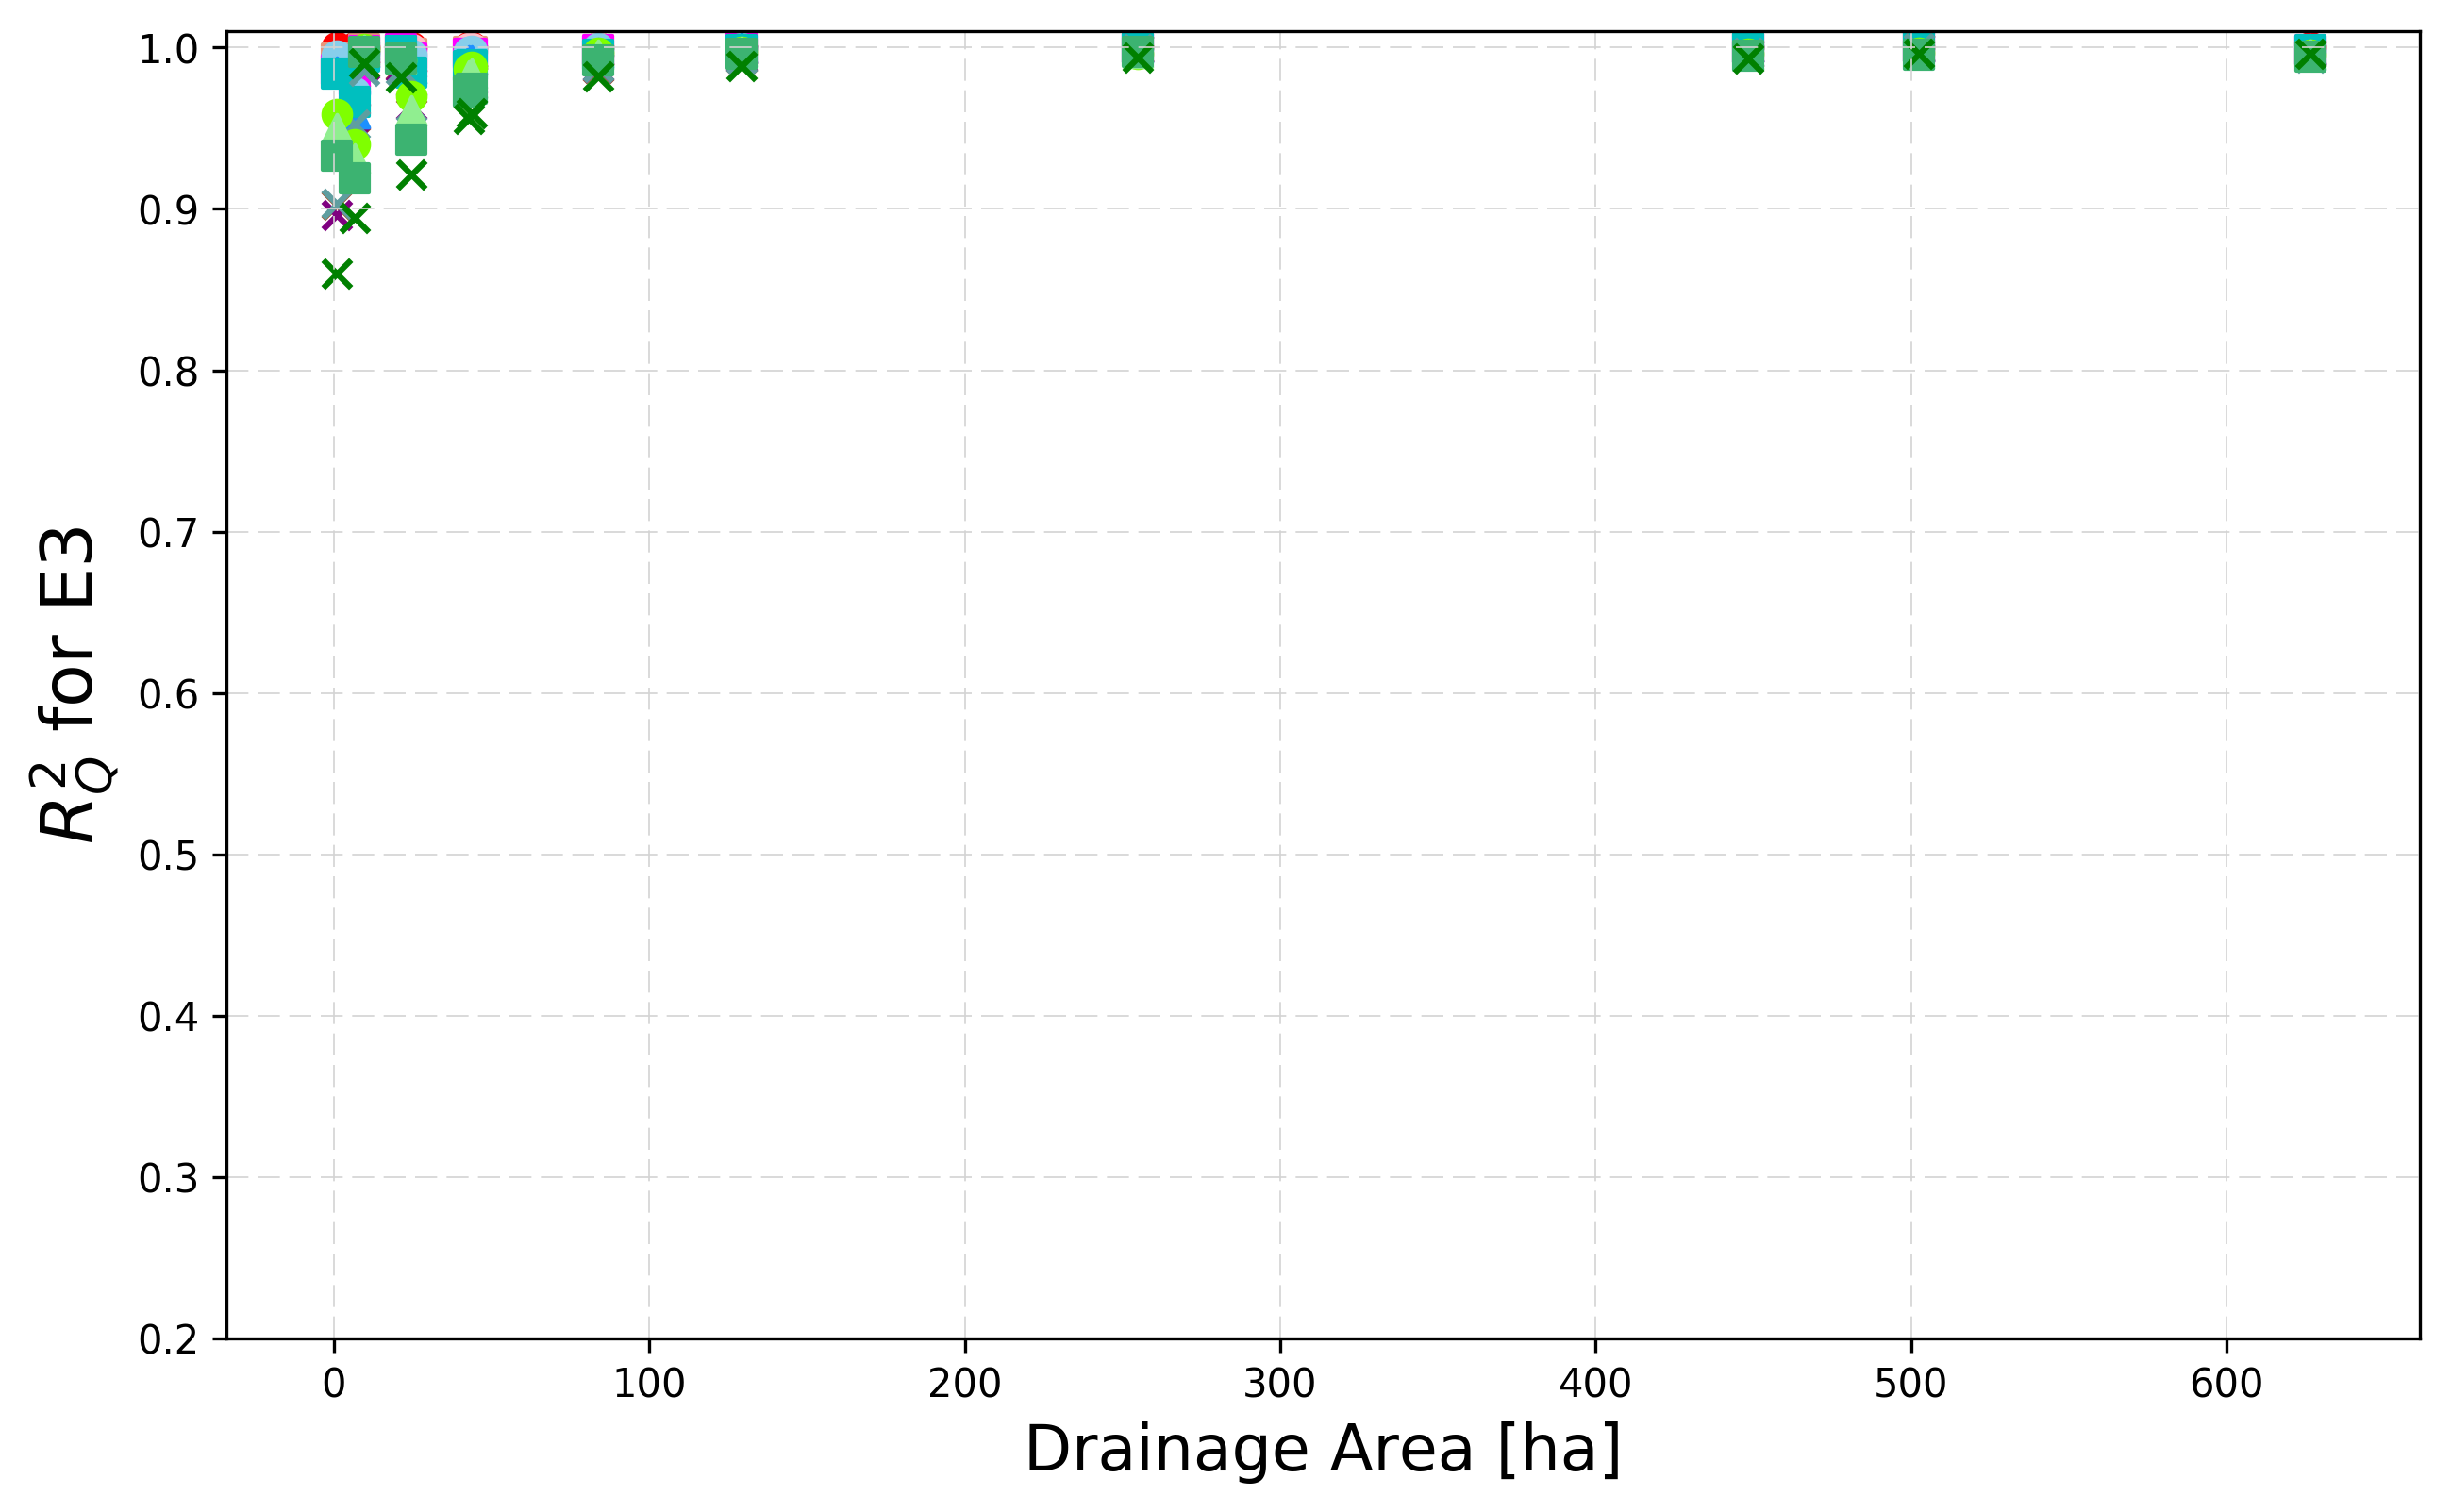

Supplement: Supplementary file 1 [file hess-22-2425-2018-supplement.zip › Flow/Flow3_R2_E3.png]

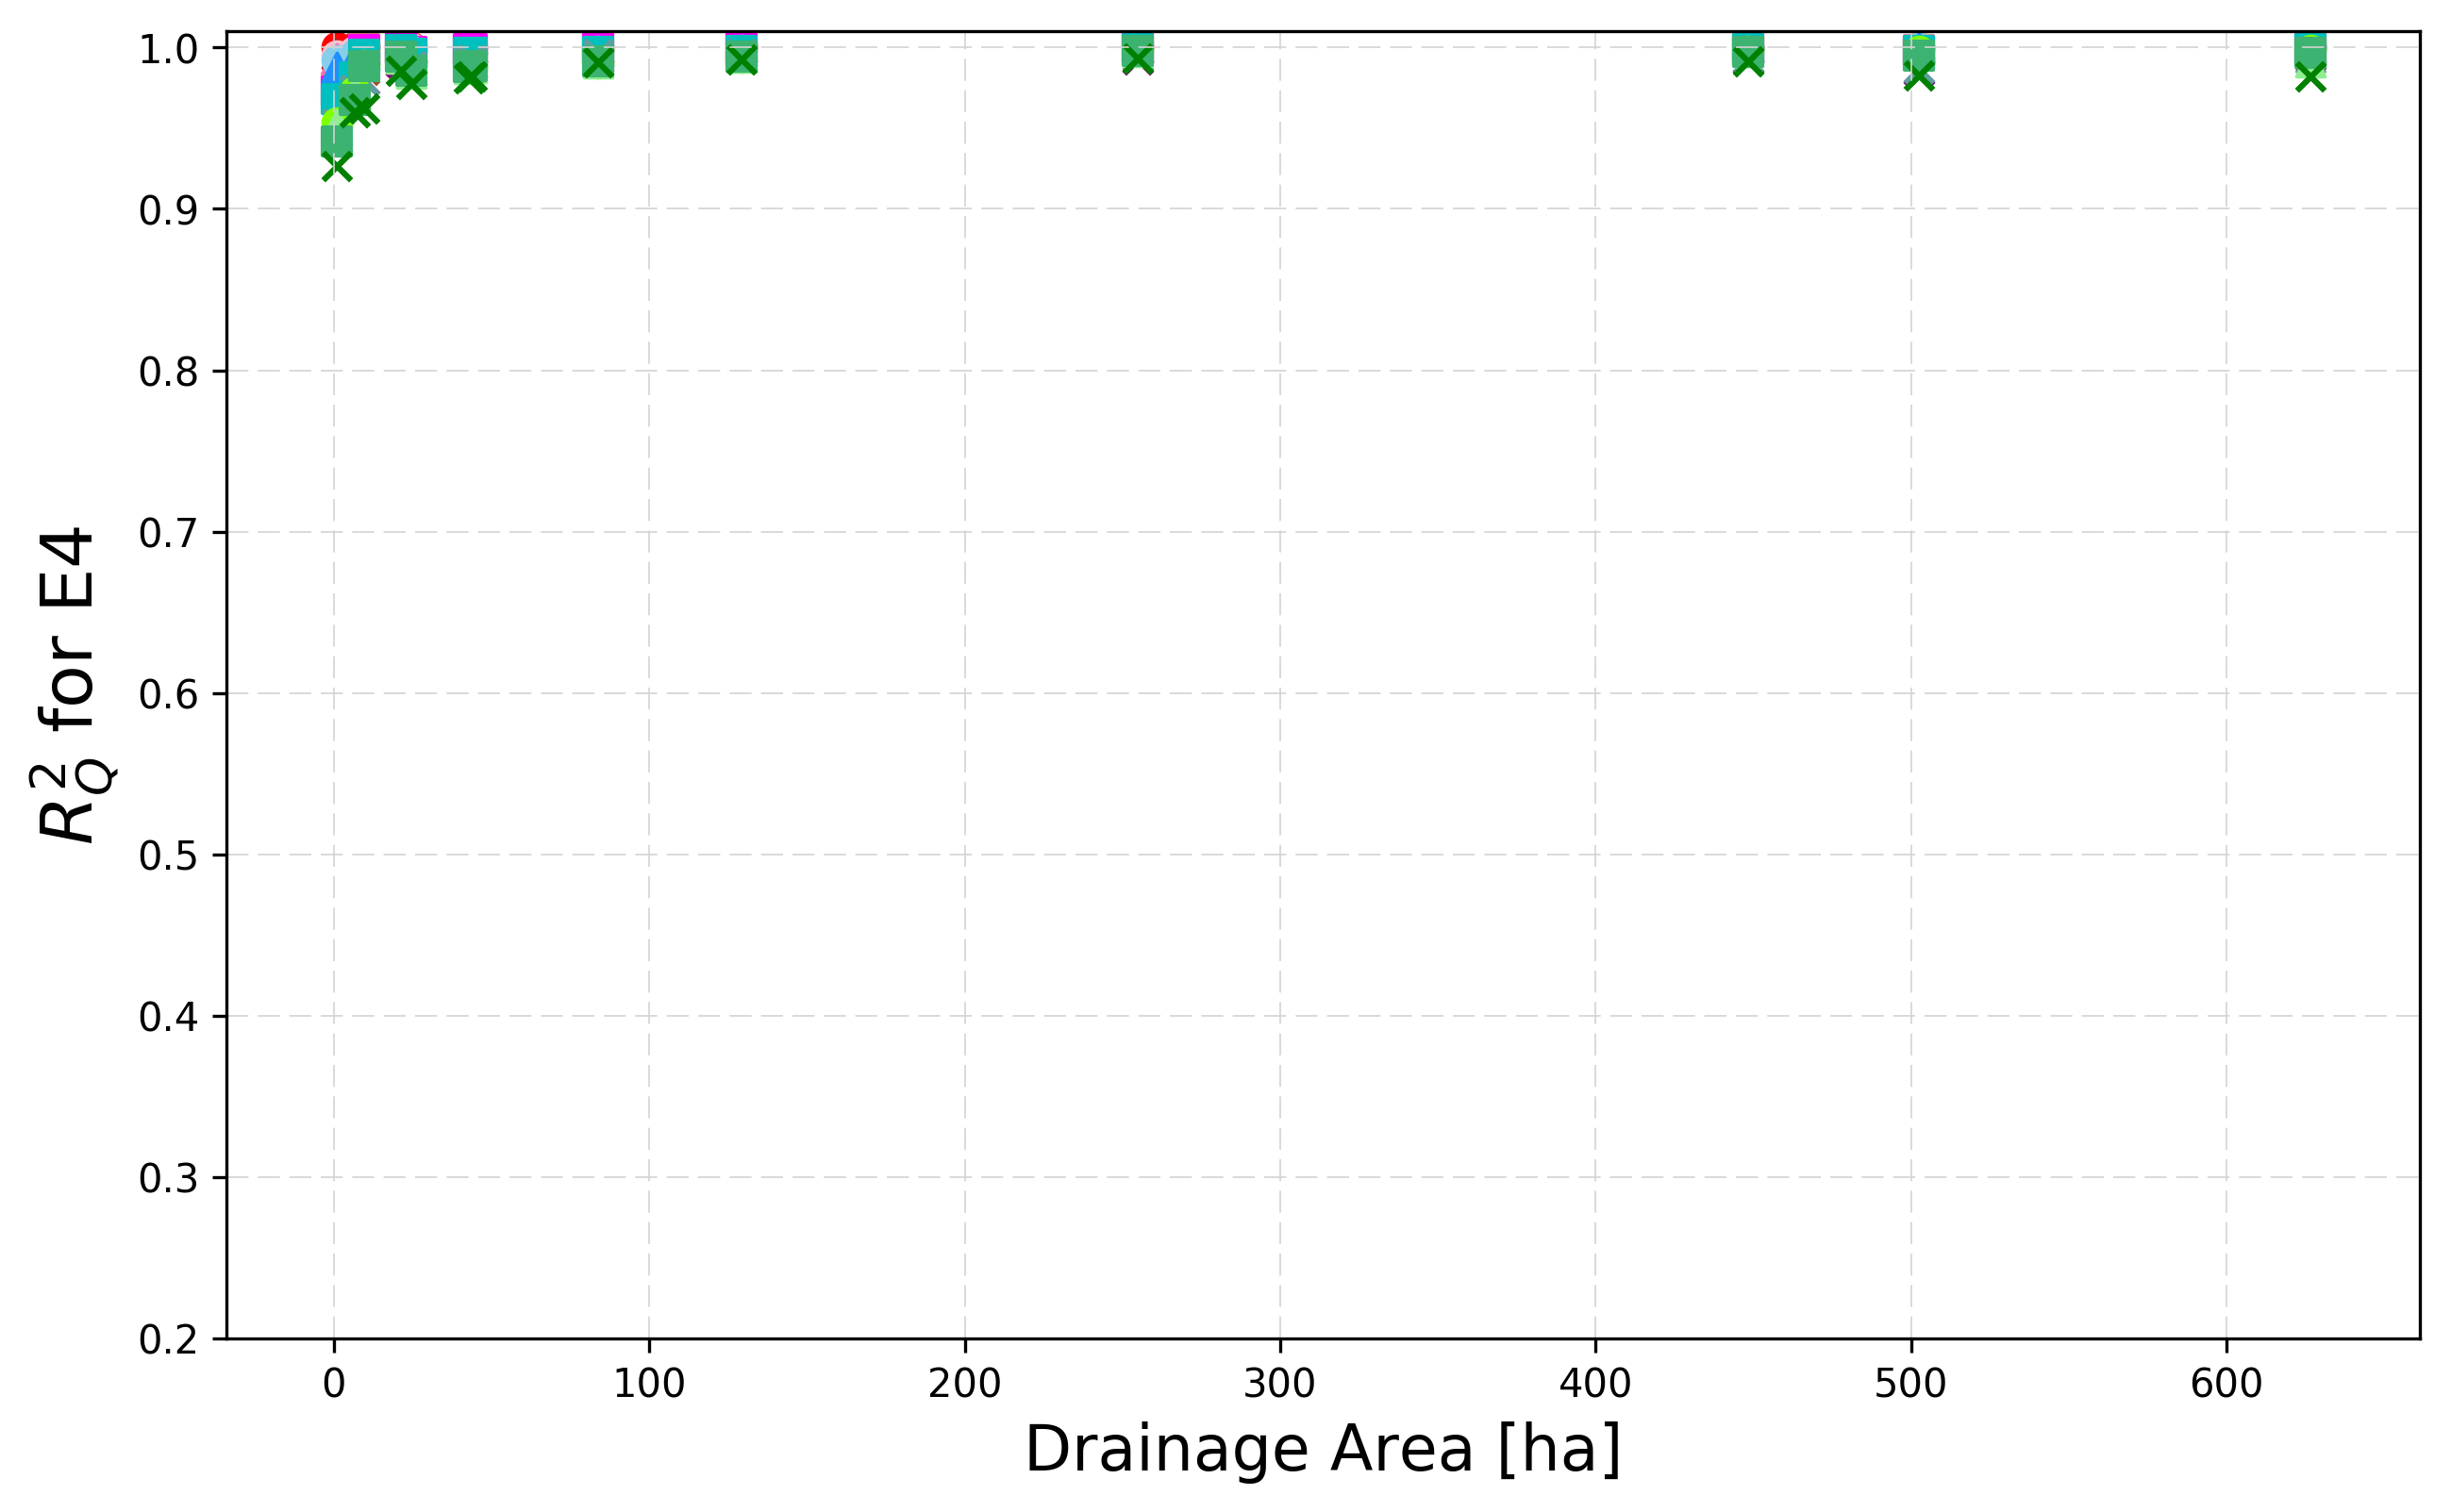

Supplement: Supplementary file 1 [file hess-22-2425-2018-supplement.zip › Flow/Flow3_R2_E4.png]

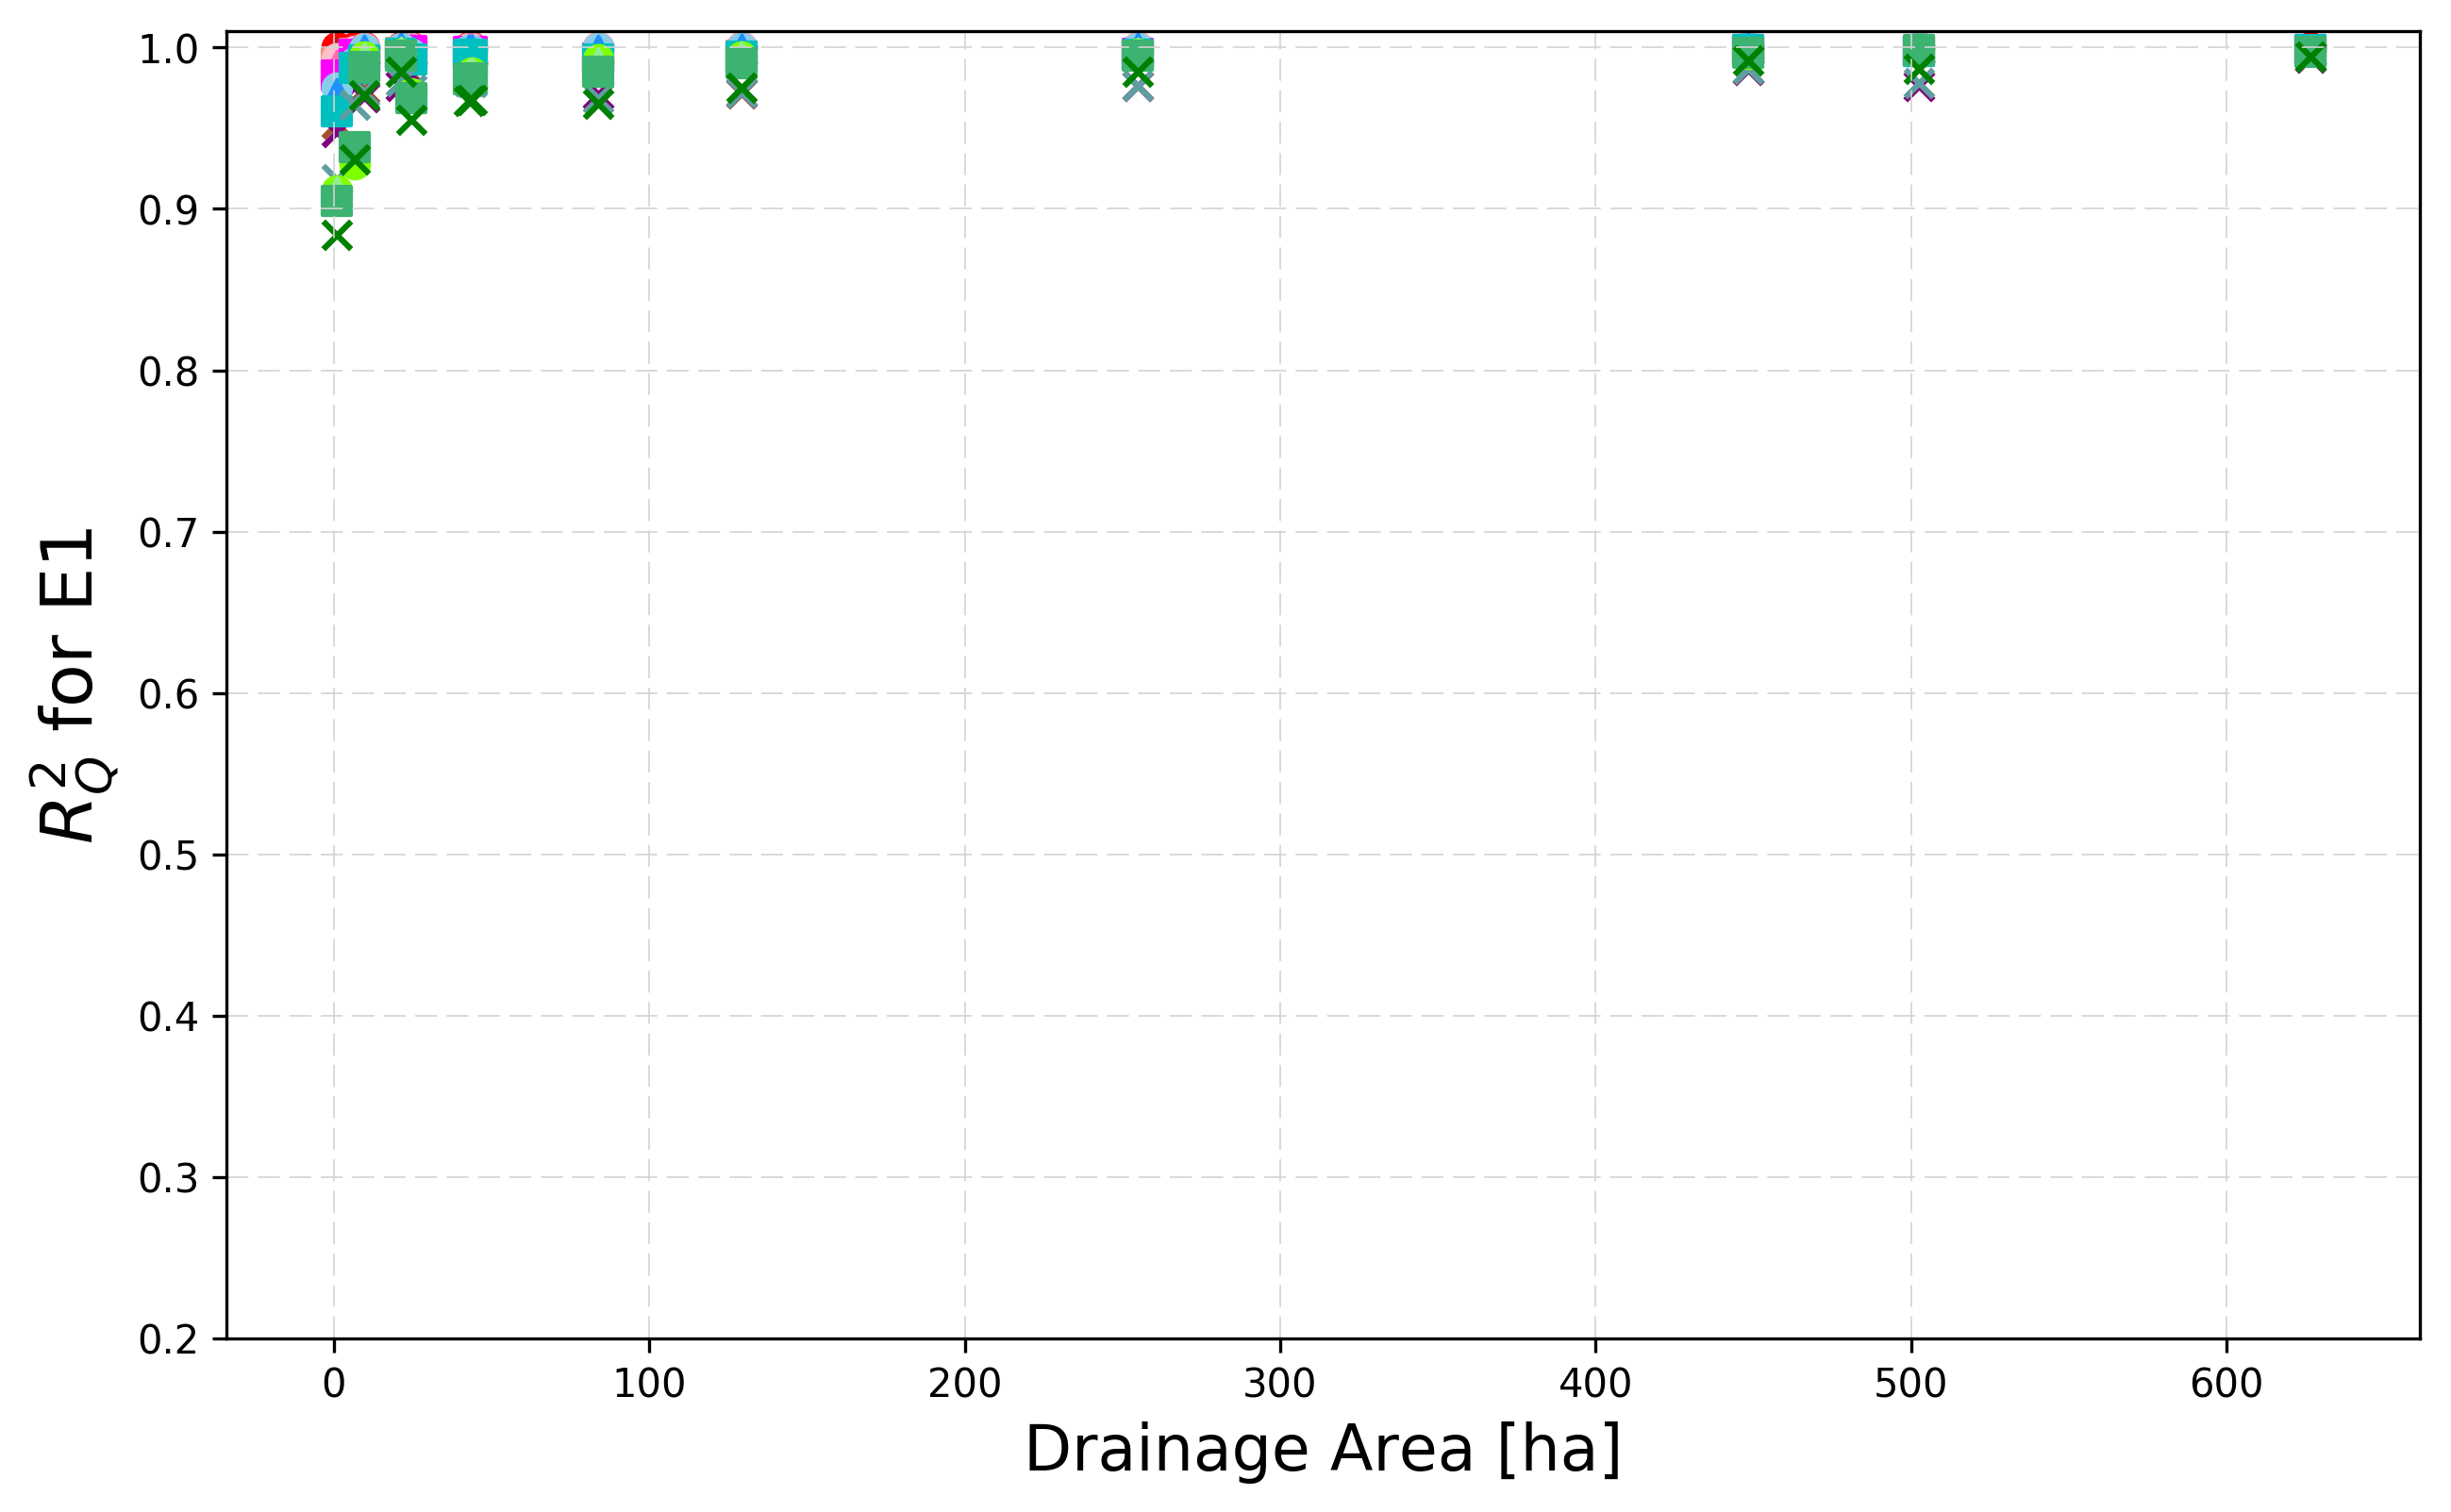

Supplement: Supplementary file 1 [file hess-22-2425-2018-supplement.zip › Flow/Flow3_R2_E1.png]
